# Supplementary material for: Endothelin B receptor inhibition rescues aging-dependent neuronal regenerative decline
Source: eLife. 2025 Sep 9;13:RP100217. doi: 10.7554/eLife.100217 (PMC12419800; doi:10.7554/eLife.100217)
Supplement: Figure 5—source data 1. [file elife-100217-fig5-data1.xls]

## Sheet: FindMarkers_FIB_EF
	p_val	avg_log2FC	pct.1	pct.2	p_val_adj
Slc47a1	0	7.05468	0.871	0.032	0
Eya2	0	4.29993	0.952	0.138	0
Foxp2	0	4.25657	0.955	0.172	0
Tspan11	0	5.82431	0.802	0.037	0
Slc4a10	0	5.99648	0.896	0.159	0
Egfr	0	3.84798	0.79	0.083	0
Cped1	0	3.04972	0.911	0.208	0
Ntn1	0	4.30629	0.751	0.079	0
Mrc2	0	4.02506	0.733	0.091	0
Slit2	0	3.12559	0.838	0.204	0
Abcb1a	0	3.63221	0.708	0.083	0
Smoc2	0	3.56939	0.715	0.091	0
Col12a1	0	5.09297	0.695	0.074	0
Igfbp5	0	5.1119	0.751	0.135	0
Bnc2	0	2.86817	0.95	0.337	0
Prrx1	0	4.96504	0.653	0.047	0
Pid1	0	2.50089	0.818	0.213	0
Trabd2b	0	4.85841	0.667	0.064	0
Col8a1	0	3.85295	0.777	0.175	0
Mgp	0	4.56083	0.663	0.073	0
Tbx15	0	5.25466	0.637	0.05	0
Rspo3	0	6.12515	0.601	0.023	0
Adamtsl3	0	5.15544	0.723	0.145	0
Adamts2	0	3.44372	0.691	0.12	0
Zic1	0	4.11973	0.602	0.044	0
Ddr2	0	3.39468	0.695	0.138	0
Zbtb7c	0	3.0075	0.741	0.187	0
Itgbl1	0	2.98588	0.652	0.101	0
Slc47a2	0	5.70097	0.614	0.066	0
Zic4	0	4.71454	0.574	0.033	0
Slc26a2	0	5.50687	0.602	0.064	0
Htra3	0	4.97235	0.556	0.026	0
Cdon	0	4.19509	0.68	0.15	0
Slc26a7	0	6.49298	0.551	0.032	0
Gm26740	0	2.88889	0.607	0.089	0
Bmp6	0	3.94816	0.62	0.103	0
Prdm6	0	4.62717	0.589	0.076	0
Bmper	0	4.19607	0.647	0.137	0
Col6a2	0	4.50025	0.559	0.058	0
Col6a1	0	4.20988	0.538	0.042	0
Kcnk5	0	3.32015	0.591	0.1	0
Gxylt2	0	4.66795	0.528	0.046	0
Gm29478	0	5.47336	0.507	0.037	0
Gm49417	0	4.14681	0.497	0.061	0
Thbs1	0	5.49879	0.45	0.02	0
Pde5a	0	3.76206	0.49	0.063	0
Col8a2	0	5.05525	0.449	0.025	0
Anxa3	0	3.51294	0.482	0.065	0
Afap1l1	0	4.46643	0.474	0.06	0
Ptgis	0	5.14494	0.437	0.025	0
Smad6	0	4.36091	0.459	0.059	0
Lbp	0	3.65748	0.441	0.049	0
Gm49394	0	5.45643	0.411	0.026	0
Foxd1	0	3.71749	0.411	0.033	0
Scara3	0	3.80638	0.417	0.039	0
Kcnj2	0	4.93834	0.401	0.03	0
Slc9b2	0	5.16538	0.396	0.041	0
Bmp4	0	5.60203	0.358	0.011	0
Klf4	0	4.13433	0.358	0.035	0
Foxc1	0	3.8341	0.343	0.029	0
Foxp1	0	2.87285	0.985	0.684	0
H19	0	5.85229	0.294	0.013	0
Pamr1	0	4.53601	0.289	0.019	0
Cacna1g	0	5.10161	0.281	0.016	0
Gm5860	0	6.12455	0.256	0.012	0
Ecrg4	0	5.13095	0.249	0.011	0
Foxc2	0	4.63345	0.243	0.011	0
Hhip	0	4.79926	0.244	0.015	0
Prg4	0	6.01548	0.21	0.007	0
Gm6260	0	6.79068	0.195	0.008	0
Vsx1	0	8.1895	0.168	0.001	0
Ccn5	0	6.98924	0.162	0.002	0
Myoc	2.07213e-304	5.45231	0.251	0.016	5.63745e-300
Plac9	4.03069e-303	3.22264	0.512	0.078	1.09659e-298
Tnfrsf11b	4.46089e-301	5.24571	0.175	0.007	1.21363e-296
Slc38a2	4.81787e-294	3.57217	0.942	0.581	1.31075e-289
Ccn3	1.03002e-292	4.58717	0.347	0.036	2.80228e-288
Gpc6	5.03476e-292	2.57357	0.967	0.529	1.36976e-287
Ccn1	2.00684e-289	4.9284	0.228	0.014	5.45982e-285
Gm37184	6.70423e-286	6.32382	0.191	0.009	1.82395e-281
Slc23a2	8.33668e-284	3.64084	0.825	0.323	2.26808e-279
Gm973	1.26544e-283	5.16794	0.389	0.049	3.44275e-279
Slc9a2	2.01108e-282	5.38148	0.335	0.035	5.47135e-278
Ramp1	4.83668e-282	4.51142	0.254	0.018	1.31587e-277
Crim1	4.29374e-280	3.38615	0.749	0.225	1.16815e-275
Klf12	5.58098e-277	2.62709	0.903	0.392	1.51836e-272
Prickle1	6.86197e-274	3.09441	0.701	0.186	1.86687e-269
Olfr1033	2.91778e-272	3.50735	0.673	0.172	7.93811e-268
Pi16	3.21224e-272	5.81154	0.264	0.021	8.73923e-268
Hoxa5	2.74178e-271	3.69424	0.53	0.099	7.45929e-267
Krtdap	5.5239e-270	6.37128	0.107	0.002	1.50283e-265
Eln	3.44913e-269	4.70079	0.36	0.043	9.38371e-265
Fbln1	3.90868e-267	4.55665	0.252	0.019	1.0634e-262
Airn	2.67388e-262	2.45244	0.894	0.371	7.27456e-258
Gas1	5.63113e-262	4.84348	0.234	0.017	1.53201e-257
Hoxb6	3.70661e-257	2.89385	0.635	0.15	1.00842e-252
Bgn	1.72146e-255	3.54671	0.366	0.046	4.68342e-251
Col3a1	3.33076e-255	3.53163	0.538	0.103	9.06168e-251
Klf2	9.0433e-255	3.60108	0.332	0.037	2.46032e-250
Mpzl2	3.24673e-251	4.43071	0.195	0.011	8.83305e-247
Sned1	6.02593e-251	2.88441	0.748	0.246	1.63942e-246
Eya1	2.8556e-247	3.68675	0.348	0.043	7.76894e-243
Gm14964	1.36401e-245	5.04327	0.155	0.007	3.71092e-241
F3	3.98941e-242	3.22578	0.525	0.104	1.08536e-237
Rassf2	1.15833e-241	3.08421	0.54	0.11	3.15135e-237
Vill	1.64714e-240	3.91096	0.262	0.024	4.48122e-236
Gm5089.1	1.83013e-240	4.89806	0.15	0.006	4.97905e-236
Col1a1	4.13913e-240	3.20641	0.541	0.109	1.12609e-235
Scarf2	7.44232e-240	3.64938	0.274	0.026	2.02476e-235
Nhsl2	1.76024e-237	2.70684	0.677	0.187	4.78892e-233
Plod2	5.81496e-236	3.98521	0.523	0.113	1.58202e-231
Scara5	2.04476e-234	4.36349	0.343	0.045	5.56298e-230
Msln	4.10525e-234	5.62352	0.106	0.002	1.11688e-229
Pla2g4a	1.67562e-231	3.24665	0.399	0.06	4.5587e-227
Arsi	2.21906e-229	5.06942	0.127	0.004	6.03718e-225
Fam20a	2.20539e-223	3.79236	0.45	0.085	5.99999e-219
Rbp1	2.86122e-223	3.54301	0.358	0.05	7.78423e-219
Fxyd5	1.11978e-222	3.45931	0.472	0.093	3.04648e-218
Fhl2	1.44216e-222	3.66602	0.355	0.05	3.92353e-218
Mn1	1.86936e-220	5.71055	0.135	0.006	5.08577e-216
Nfix	6.73646e-220	2.93456	0.624	0.169	1.83272e-215
Col1a2	2.80616e-218	2.5355	0.8	0.289	7.63443e-214
Prrx2	1.08812e-216	4.50197	0.281	0.032	2.96034e-212
Slc16a9	7.37615e-216	4.01006	0.462	0.093	2.00676e-211
Eya4	2.75602e-215	4.31226	0.32	0.042	7.49802e-211
Twist2	2.25959e-214	4.45367	0.17	0.01	6.14745e-210
Rhoj	6.35888e-214	2.632	0.673	0.192	1.73e-209
Boc	8.98602e-213	3.74947	0.573	0.154	2.44474e-208
Gm20756	9.12011e-212	4.41289	0.177	0.011	2.48122e-207
Id1	1.50222e-208	3.92082	0.332	0.047	4.08695e-204
Slc38a1	9.64309e-204	3.62224	0.611	0.189	2.6235e-199
Pbx1	1.54214e-201	2.01512	0.934	0.602	4.19554e-197
Gmds	1.97823e-201	2.38414	0.817	0.384	5.38197e-197
Crabp2	2.57017e-200	4.31347	0.157	0.009	6.9924e-196
Gli2	1.49613e-198	2.68371	0.345	0.05	4.07037e-194
Dnm3os	7.631e-198	4.60344	0.144	0.008	2.07609e-193
Gm31409	4.82022e-196	6.24349	0.104	0.003	1.31139e-191
Dock5	9.31554e-194	2.56471	0.741	0.296	2.53439e-189
Tmem119	2.63202e-189	5.15722	0.107	0.004	7.16067e-185
Flrt2	2.83315e-189	3.25842	0.556	0.156	7.70787e-185
Dst	6.18779e-189	-1.89115	0.736	0.934	1.68345e-184
Lsp1	1.40143e-188	3.46182	0.271	0.033	3.81273e-184
Slc35g1	9.51052e-187	4.83209	0.219	0.022	2.58743e-182
Gm5089	1.46673e-186	4.48426	0.224	0.023	3.99038e-182
Ildr2	1.47847e-186	3.64782	0.427	0.089	4.02231e-182
Cadm1	3.84864e-185	-3.40868	0.238	0.802	1.04706e-180
Arhgap10	1.2377e-183	2.22594	0.65	0.201	3.36728e-179
Igfbp6	5.54161e-183	2.93336	0.406	0.076	1.50765e-178
Sncaip	7.36439e-183	3.66755	0.376	0.069	2.00356e-178
C430049B03Rik	9.21683e-183	4.33578	0.129	0.006	2.50753e-178
Arhgap6	1.40954e-182	2.66746	0.568	0.159	3.83478e-178
Hoxc6	1.46554e-182	2.61436	0.733	0.312	3.98714e-178
Man1a	1.24643e-181	2.40057	0.531	0.135	3.39103e-177
Thbd	2.46584e-180	3.62386	0.304	0.044	6.70857e-176
Hoxa3	1.59185e-179	2.98848	0.521	0.137	4.33078e-175
Smoc1	1.88896e-178	3.1198	0.53	0.143	5.13911e-174
Pcolce	6.7747e-178	2.73682	0.36	0.061	1.84313e-173
Slc12a7	6.03257e-177	3.28064	0.472	0.114	1.64122e-172
Bmp1	1.08858e-175	2.58595	0.579	0.168	2.96158e-171
Ltbp4	1.20802e-175	2.77658	0.411	0.081	3.28655e-171
Adamtsl1	3.6443e-175	2.90246	0.55	0.156	9.91468e-171
Col25a1	7.51742e-174	5.11049	0.503	0.14	2.04519e-169
Pde3a	4.01116e-173	2.87634	0.436	0.095	1.09128e-168
Kif21a	1.33619e-172	-2.55162	0.371	0.838	3.63523e-168
Fkbp5	3.94514e-171	2.47444	0.746	0.339	1.07332e-166
Sfrp4	7.49916e-171	4.92247	0.314	0.051	2.04022e-166
Zic5	1.53093e-169	4.40496	0.134	0.008	4.16504e-165
Arhgap20	4.1665e-169	3.5001	0.487	0.131	1.13354e-164
Fbxl7	7.71362e-169	2.35179	0.848	0.459	2.09857e-164
Pla2g4f	1.01613e-168	5.38726	0.12	0.006	2.76447e-164
Ptpru	1.17302e-168	4.22635	0.267	0.037	3.1913e-164
Ldlrad4	1.15834e-167	2.0919	0.757	0.317	3.15139e-163
Myof	6.78904e-167	2.23742	0.373	0.068	1.84703e-162
Ppp1r3c	9.59503e-166	4.92869	0.129	0.008	2.61042e-161
Nxn	1.54321e-165	2.54201	0.756	0.362	4.19845e-161
Zbtb16	2.97689e-164	2.16877	0.715	0.281	8.09892e-160
Adamts10	1.37155e-163	2.59612	0.554	0.165	3.73145e-159
Afdn	1.7028e-163	2.22024	0.757	0.359	4.63265e-159
Npr3	4.81204e-163	4.67352	0.157	0.012	1.30916e-158
Atp10a	1.31032e-162	2.70004	0.426	0.095	3.56486e-158
Ednra	1.95379e-162	3.10784	0.371	0.073	5.31548e-158
Nfatc4	5.61025e-162	4.20199	0.13	0.008	1.52632e-157
Fn1	4.71946e-161	3.08565	0.373	0.074	1.28398e-156
St3gal4	6.24151e-159	2.12227	0.843	0.449	1.69806e-154
Wwp1	7.29802e-159	2.47069	0.744	0.378	1.9855e-154
Pdgfd	6.80793e-157	2.88152	0.337	0.061	1.85216e-152
Lrp1	1.53297e-155	2.14176	0.769	0.386	4.1706e-151
Tnfaip8l3	7.56945e-155	5.03753	0.219	0.027	2.05935e-150
Lsamp	3.38915e-152	-3.57415	0.347	0.782	9.22053e-148
Myzap	4.32344e-152	3.4804	0.312	0.055	1.17623e-147
Foxd2os	8.87675e-150	2.21087	0.383	0.079	2.41501e-145
Esr1	1.53639e-148	3.33492	0.492	0.144	4.17989e-144
Phldb2	1.72208e-148	2.46273	0.682	0.286	4.68509e-144
Card14	5.88225e-147	4.28681	0.229	0.031	1.60032e-142
Cald1	1.59249e-146	2.00202	0.728	0.312	4.33253e-142
Tmeff2	5.9286e-146	2.27715	0.764	0.382	1.61293e-141
Rnf220	1.11e-145	2.84506	0.698	0.35	3.01986e-141
Trpm6	1.14092e-145	3.41712	0.285	0.048	3.10398e-141
Adgrl3	1.73033e-145	-3.81745	0.162	0.697	4.70752e-141
Rhobtb1	2.33387e-144	3.35386	0.401	0.098	6.34952e-140
Lrp6	4.85711e-144	2.18401	0.754	0.406	1.32143e-139
Luzp2	4.7513e-143	-3.9313	0.134	0.676	1.29264e-138
Csmd1	2.11406e-142	-2.8668	0.559	0.859	5.75151e-138
Slc5a6	2.47438e-142	3.97273	0.345	0.074	6.73181e-138
Stk39	3.60816e-142	2.18017	0.832	0.552	9.81636e-138
Nfib	1.17126e-141	1.58043	0.88	0.547	3.18652e-137
Jmjd1c	7.37313e-141	1.654	0.881	0.595	2.00593e-136
Etl4	1.22658e-140	2.45614	0.779	0.436	3.33703e-136
Slc24a3	2.63293e-140	2.28066	0.761	0.412	7.16314e-136
Gpr4	1.72431e-139	4.82724	0.102	0.006	4.69116e-135
Nkain2	2.25315e-139	-3.62939	0.177	0.703	6.12992e-135
Frmd4a	9.00498e-139	-3.22645	0.224	0.717	2.4499e-134
Anxa1	1.18354e-134	3.01855	0.221	0.03	3.21995e-130
Nupr1	1.70808e-133	3.44625	0.205	0.026	4.64701e-129
Ptprk	1.13305e-132	2.13757	0.493	0.149	3.08259e-128
Pex5l	6.56665e-132	-3.63779	0.109	0.645	1.78652e-127
Car13	9.07184e-132	3.16333	0.262	0.043	2.46808e-127
Xdh	3.40662e-130	2.21571	0.32	0.063	9.26804e-126
Dse	2.35902e-129	2.63974	0.483	0.153	6.41794e-125
Sulf1	2.87752e-129	1.8516	0.71	0.316	7.82859e-125
Mill2	6.7782e-129	2.13922	0.538	0.18	1.84408e-124
Slc2a13	7.48845e-129	2.98926	0.507	0.171	2.03731e-124
Pals2	8.31661e-129	2.55714	0.559	0.208	2.26262e-124
Fndc3b	8.71739e-129	1.79462	0.741	0.359	2.37165e-124
Strbp	1.2758e-128	1.95148	0.777	0.472	3.47094e-124
Col6a3	1.91369e-128	2.87676	0.353	0.079	5.2064e-124
Emilin1	8.92038e-128	3.9885	0.153	0.015	2.42688e-123
Fbn1	2.65914e-127	3.04143	0.508	0.167	7.23446e-123
Pcdh9	3.18638e-127	-2.62101	0.361	0.792	8.66887e-123
Gli3	1.26933e-126	2.68656	0.375	0.089	3.45333e-122
Samd4	3.22968e-125	1.95283	0.739	0.374	8.78668e-121
Itpr2	1.24996e-124	2.00219	0.554	0.189	3.40064e-120
Akap13	2.66752e-124	1.49621	0.851	0.578	7.25727e-120
Mapt	6.13684e-124	-2.83055	0.17	0.663	1.66959e-119
Slco3a1	3.61319e-123	2.21164	0.749	0.446	9.83005e-119
Ust	1.56831e-122	1.773	0.756	0.397	4.26676e-118
Dlgap1	2.48041e-122	-3.44907	0.165	0.657	6.7482e-118
Adamts6	4.04672e-122	3.05941	0.378	0.097	1.10095e-117
Clic4	1.96962e-121	2.46042	0.622	0.259	5.35856e-117
Ank3	1.78614e-120	-3.07365	0.292	0.709	4.85937e-116
Irag1	4.52803e-119	3.41246	0.221	0.035	1.2319e-114
Pkd1	1.22171e-118	1.93911	0.703	0.368	3.32379e-114
Cit	3.00616e-118	3.01738	0.449	0.146	8.17856e-114
Frk	3.42321e-118	3.57235	0.162	0.018	9.31317e-114
Nat8f3	6.38231e-118	4.45725	0.125	0.011	1.73637e-113
Lmo4	9.20766e-118	2.36248	0.607	0.263	2.50504e-113
Ptprt	9.87817e-118	-3.71789	0.127	0.62	2.68746e-113
Hoxb4	1.03517e-117	2.96833	0.353	0.086	2.81629e-113
Ncam1	9.48654e-117	-3.32316	0.162	0.652	2.58091e-112
Shisa3	1.27294e-116	3.35526	0.256	0.047	3.46316e-112
Dab2	1.54386e-116	2.27704	0.403	0.11	4.20024e-112
Gpc3	2.74317e-116	2.12213	0.487	0.161	7.46307e-112
Sp140	9.51117e-116	2.72781	0.246	0.043	2.58761e-111
Notch2	1.93635e-115	1.82611	0.602	0.231	5.26804e-111
Cmip	2.6047e-115	1.50062	0.853	0.568	7.08635e-111
Setbp1	1.05753e-114	1.53681	0.853	0.519	2.87711e-110
Nbea	5.11616e-114	1.77945	0.751	0.438	1.3919e-109
Gm16046	4.15783e-113	3.52142	0.177	0.023	1.13118e-108
Tcf7l2	1.70545e-112	1.52313	0.776	0.386	4.63985e-108
Abi1	8.51941e-112	2.31675	0.792	0.545	2.31779e-107
Tgfbr1	1.82797e-111	1.8255	0.536	0.198	4.97317e-107
Mpped2	4.4027e-111	2.02126	0.668	0.316	1.1978e-106
Dlg2	5.2179e-111	1.29693	0.776	0.442	1.41958e-106
Cpq	1.01887e-110	1.79441	0.701	0.355	2.77194e-106
Svil	1.94858e-110	1.93823	0.629	0.277	5.30131e-106
Kif1a	4.51914e-109	-2.6538	0.19	0.65	1.22948e-104
Prune2	7.07423e-109	-3.006	0.381	0.716	1.92461e-104
Tsc22d3	5.92902e-107	2.32808	0.601	0.277	1.61305e-102
Snhg18	1.08988e-105	2.48854	0.287	0.062	2.96514e-101
Dtna	2.42577e-105	-3.28112	0.092	0.568	6.59956e-101
Lima1	4.23295e-105	1.98645	0.645	0.317	1.15162e-100
Sik3	4.70108e-105	1.47825	0.769	0.431	1.27898e-100
Tmtc2	1.05596e-104	-3.1457	0.147	0.623	2.87285e-100
Rai14	1.26799e-104	1.94155	0.589	0.252	3.44971e-100
Smad3	6.17959e-104	2.43824	0.342	0.087	1.68122e-99
Rassf8	7.08697e-104	2.08511	0.525	0.2	1.92808e-99
Dhrs3	3.74644e-103	2.35828	0.328	0.08	1.01926e-98
Aatk	6.57094e-103	-3.40197	0.086	0.569	1.78769e-98
Trim2	6.53435e-102	-2.32545	0.257	0.69	1.77773e-97
Zic2	4.23332e-101	3.43375	0.102	0.008	1.15172e-96
Sorcs1	9.31285e-101	-3.72347	0.086	0.549	2.53365e-96
Hes1	1.1845e-100	2.58335	0.459	0.162	3.22254e-96
Ahcyl2	1.62052e-100	1.9391	0.716	0.448	4.40878e-96
Il1rapl1	2.33173e-100	-2.86713	0.188	0.632	6.3437e-96
Tenm3	3.73547e-100	-2.85384	0.144	0.61	1.01627e-95
Tmem100	5.23352e-100	2.95665	0.411	0.133	1.42383e-95
Mical2	7.94038e-99	1.92985	0.655	0.343	2.16026e-94
Kcnq1ot1	1.38986e-98	1.25737	0.835	0.514	3.78125e-94
Soga3	3.60641e-98	-3.10437	0.097	0.556	9.8116e-94
Grb10	3.92167e-98	1.98648	0.587	0.263	1.06693e-93
Arhgef28	6.54119e-98	1.82518	0.644	0.327	1.7796e-93
Xist	8.84207e-98	0.876812	0.972	0.794	2.40557e-93
Tcf7l1	9.6895e-98	1.25779	0.743	0.348	2.63613e-93
A530032D15Rik	2.06241e-97	3.29442	0.173	0.026	5.61099e-93
Slc35f1	6.45767e-97	-3.87058	0.117	0.565	1.75687e-92
Dnajc5b	1.48259e-96	4.79419	0.167	0.025	4.03352e-92
Nr3c2	1.66847e-96	1.76225	0.751	0.471	4.53925e-92
Sobp	2.19798e-96	1.84403	0.668	0.363	5.97982e-92
Papss2	2.35907e-96	3.39862	0.203	0.035	6.41809e-92
Lifr	2.55399e-96	-2.0121	0.233	0.662	6.94839e-92
Tmtc1	2.89132e-96	1.68388	0.744	0.454	7.86614e-92
Ddx5	3.08326e-96	1.1684	0.904	0.755	8.38832e-92
Adgrb3	6.63029e-96	-3.77243	0.114	0.564	1.80384e-91
Gm35853	7.84112e-96	4.44451	0.111	0.011	2.13326e-91
Mfap5	1.74432e-95	2.15383	0.591	0.284	4.7456e-91
Heg1	4.87719e-95	2.61364	0.45	0.163	1.32689e-90
Vps13a	4.9937e-95	1.58532	0.756	0.524	1.35859e-90
Scd2	1.45733e-94	-2.13036	0.323	0.71	3.96482e-90
Skil	5.49628e-94	2.88166	0.35	0.103	1.49532e-89
Zfpm2	8.97277e-94	1.728	0.665	0.332	2.44113e-89
Syt11	2.5102e-93	-2.19033	0.327	0.712	6.82926e-89
Oxr1	3.13487e-92	-2.45665	0.256	0.642	8.52873e-88
Arhgap39	3.33282e-92	-2.74293	0.158	0.601	9.06727e-88
Sorbs3	6.30635e-92	1.9944	0.475	0.174	1.71571e-87
Fzd4	6.67516e-92	3.10923	0.16	0.023	1.81604e-87
Rtl4	4.62771e-91	3.71367	0.35	0.108	1.25902e-86
Nedd4	5.79402e-91	1.11983	0.871	0.718	1.57632e-86
Zfp36l1	1.11739e-90	2.15699	0.434	0.148	3.03996e-86
Arhgap24	1.20108e-90	-3.35092	0.116	0.558	3.26765e-86
Met	3.40196e-90	2.75639	0.215	0.041	9.25537e-86
Ifitm10	4.15575e-90	3.33083	0.323	0.092	1.13061e-85
Cpxm2	7.04267e-90	3.51624	0.165	0.025	1.91603e-85
Cd80	7.09223e-90	3.48102	0.175	0.028	1.92951e-85
Grik2	9.08564e-90	-3.45603	0.111	0.546	2.47184e-85
Slit3	9.65287e-90	3.03479	0.409	0.144	2.62616e-85
Ccdc80	1.75665e-89	3.6814	0.206	0.039	4.77915e-85
Add3	2.15992e-89	1.38376	0.777	0.466	5.87628e-85
Retreg1	3.63758e-89	-2.9582	0.101	0.544	9.89639e-85
Foxn3	5.6273e-89	1.29796	0.814	0.608	1.53096e-84
9330159F19Rik	1.77212e-88	-3.04849	0.063	0.502	4.82122e-84
Adam12	1.79667e-88	2.70265	0.343	0.102	4.88801e-84
C1qtnf7	6.37162e-88	2.90614	0.295	0.077	1.73346e-83
Mdfi	6.81199e-88	3.5317	0.109	0.011	1.85327e-83
Prkg1	9.08664e-88	-1.68418	0.624	0.852	2.47211e-83
Pawr	2.25342e-87	3.27015	0.302	0.083	6.13065e-83
Galnt17	2.56302e-87	-2.60733	0.183	0.596	6.97296e-83
Edil3	5.96184e-87	-1.96817	0.282	0.685	1.62198e-82
Abcg2	1.4006e-86	1.57997	0.521	0.22	3.81048e-82
Dnajc6	2.94505e-86	-3.72108	0.054	0.48	8.01229e-82
Inhba	3.45856e-86	3.87972	0.147	0.021	9.40937e-82
A830008E24Rik	6.21891e-86	4.11736	0.144	0.02	1.69192e-81
Tln2	1.16763e-85	-1.80736	0.31	0.694	3.17665e-81
Sv2c	1.26318e-85	-3.00551	0.092	0.517	3.43661e-81
Nrxn1	1.3646e-85	-3.40549	0.254	0.602	3.71253e-81
Rtn1	2.06265e-85	-1.90068	0.325	0.696	5.61165e-81
Fndc3a	2.34024e-85	1.98153	0.619	0.352	6.36686e-81
Ccn2	2.58232e-85	3.19402	0.13	0.016	7.02545e-81
Grid2	2.70132e-85	-3.54172	0.135	0.544	7.34921e-81
Hcn1	3.11173e-84	-3.764	0.094	0.502	8.46578e-80
Vit	8.34717e-84	1.71943	0.386	0.123	2.27093e-79
Eepd1	1.61644e-83	-2.8716	0.129	0.547	4.39769e-79
Frmd3	1.70306e-83	-3.84053	0.058	0.47	4.63334e-79
Ctnna2	1.75532e-83	-3.92723	0.264	0.607	4.77554e-79
Cadps	3.11489e-83	-3.73811	0.15	0.528	8.47436e-79
Kank2	7.58831e-83	1.98783	0.406	0.138	2.06447e-78
Zdhhc2	2.2024e-82	-2.49022	0.135	0.552	5.99185e-78
Ncam2	3.91384e-82	-4.23299	0.074	0.484	1.0648e-77
Prkag2	4.8111e-82	1.72491	0.672	0.402	1.30891e-77
Nav3	8.27474e-82	-2.80674	0.116	0.537	2.25123e-77
Lrrc4c	1.55831e-81	-3.44536	0.135	0.545	4.23954e-77
Col5a2	3.439e-81	1.71407	0.579	0.263	9.35613e-77
Cacna1c	4.24136e-81	0.967601	0.815	0.507	1.1539e-76
Ror1	8.66907e-81	1.68141	0.545	0.238	2.35851e-76
Sema3d	9.04735e-81	2.82504	0.312	0.092	2.46142e-76
Dpysl2	9.72293e-81	-1.89823	0.257	0.641	2.64522e-76
Loxl1	1.77026e-80	2.18276	0.261	0.064	4.81618e-76
Pdgfrl	1.88507e-80	2.93754	0.226	0.05	5.12851e-76
Mdga2	2.93928e-80	-2.12235	0.205	0.604	7.99661e-76
Efna5	4.12315e-80	1.64006	0.675	0.385	1.12174e-75
9530059O14Rik	1.00987e-79	-3.83505	0.167	0.531	2.74745e-75
Foxp4	1.3222e-79	2.12551	0.401	0.143	3.59718e-75
Gm14093	1.35394e-79	2.44564	0.381	0.133	3.68353e-75
Rrbp1	1.54117e-79	1.48944	0.731	0.481	4.19289e-75
Tfpi	1.99609e-79	3.15591	0.175	0.031	5.43057e-75
Slc24a2	2.04109e-79	-3.56417	0.099	0.49	5.55299e-75
Sh3pxd2a	2.38005e-79	1.64066	0.756	0.569	6.47517e-75
Elf4	5.07561e-79	2.22487	0.276	0.071	1.38087e-74
Enox1	6.05376e-79	-2.9875	0.211	0.574	1.64699e-74
Cavin1	6.99429e-79	2.18767	0.333	0.101	1.90287e-74
Pard3	7.35597e-79	1.22487	0.748	0.456	2.00126e-74
Gramd1b	8.3832e-79	-2.1444	0.193	0.604	2.28073e-74
Rbfox2	9.13841e-79	1.02915	0.863	0.634	2.4862e-74
Farp1	9.55631e-79	1.57957	0.719	0.463	2.59989e-74
Dysf	1.25603e-78	-3.53265	0.058	0.463	3.41716e-74
Snap25	3.44362e-78	-2.43375	0.223	0.588	9.36871e-74
Sh3rf1	6.43901e-78	2.12216	0.477	0.206	1.7518e-73
Slco2a1	6.88402e-78	2.45513	0.32	0.098	1.87287e-73
Plpp3	6.95286e-78	1.44962	0.728	0.422	1.89159e-73
Kif5a	8.85728e-78	-2.47206	0.206	0.577	2.40971e-73
Tcim	1.14546e-77	3.37204	0.152	0.024	3.11634e-73
Ttll7	1.31651e-77	-2.22308	0.274	0.628	3.58171e-73
Per3	1.44003e-77	1.47329	0.691	0.403	3.91775e-73
Morrbid	2.13943e-77	1.5472	0.597	0.285	5.82053e-73
Mboat2	3.11027e-77	-3.27042	0.096	0.495	8.4618e-73
Fzd2	5.87177e-77	2.1993	0.234	0.054	1.59747e-72
Ttc28	8.12235e-77	1.30326	0.746	0.494	2.20977e-72
Cfh	9.59419e-77	2.35992	0.322	0.096	2.61019e-72
Adam23	1.68177e-76	-3.32232	0.094	0.485	4.57543e-72
Grk5	3.10871e-76	1.82165	0.672	0.426	8.45755e-72
Emp1	3.19129e-76	2.55507	0.2	0.041	8.68223e-72
Elovl6	3.50701e-76	-2.88248	0.089	0.495	9.54117e-72
Gdpd5	8.05825e-76	2.19167	0.525	0.269	2.19233e-71
Cdh19	8.13231e-76	-4.36565	0.063	0.447	2.21248e-71
Dclk2	1.01763e-75	-2.90783	0.078	0.481	2.76857e-71
Anks1b	1.03977e-75	-2.90591	0.158	0.531	2.8288e-71
Lix1	1.39574e-75	-2.46044	0.13	0.528	3.79724e-71
Gm42742	2.12977e-75	2.16365	0.531	0.275	5.79425e-71
Bmp5	3.19271e-75	2.57419	0.241	0.059	8.68608e-71
Rims2	4.00458e-75	-3.31095	0.112	0.487	1.08949e-70
Bicc1	4.1758e-75	1.67632	0.561	0.282	1.13607e-70
Scn9a	8.26102e-75	-2.76876	0.185	0.54	2.24749e-70
Nfia	9.46294e-75	0.906619	0.924	0.731	2.57449e-70
Islr	9.54685e-75	2.16077	0.233	0.054	2.59732e-70
Igfbp7	1.08564e-74	1.47067	0.337	0.103	2.9536e-70
Tmem45a	1.2687e-74	3.48153	0.107	0.013	3.45162e-70
Adra1b	1.76179e-74	3.66189	0.155	0.027	4.79312e-70
Cntnap2	4.24847e-74	-3.57411	0.38	0.65	1.15584e-69
Elavl4	7.65334e-74	-2.53022	0.208	0.557	2.08217e-69
Mtcl1	1.331e-73	-3.43557	0.068	0.449	3.62113e-69
Epb41l3	2.10654e-73	-2.29555	0.254	0.599	5.73106e-69
Chst11	2.53863e-73	2.18622	0.545	0.293	6.90659e-69
Akap6	2.85093e-73	-3.02088	0.162	0.518	7.75625e-69
Aebp1	3.03364e-73	2.06192	0.259	0.066	8.25332e-69
Elavl2	3.44858e-73	-2.97702	0.149	0.508	9.38221e-69
Csmd2	3.44987e-73	-3.19564	0.102	0.48	9.38571e-69
Wnt9a	4.89151e-73	3.58397	0.256	0.071	1.33078e-68
Bach2	6.15065e-73	-2.30079	0.219	0.596	1.67334e-68
Anpep	9.91395e-73	2.30215	0.175	0.033	2.69719e-68
Prph	1.18081e-72	-2.135	0.285	0.628	3.21252e-68
Gnas	1.38012e-72	1.40943	0.924	0.826	3.75477e-68
Naaladl2	2.03379e-72	1.47579	0.741	0.503	5.53312e-68
Sgsm2	4.70581e-72	2.13479	0.472	0.217	1.28026e-67
Tns2	4.77546e-72	2.31876	0.384	0.144	1.29921e-67
Mapk10	5.38009e-72	-3.15587	0.096	0.47	1.46371e-67
Zfp618	6.05189e-72	2.40596	0.361	0.131	1.64648e-67
Clk1	7.02125e-72	1.23811	0.766	0.555	1.9102e-67
Neat1	7.04436e-72	0.714411	0.955	0.643	1.91649e-67
Fhip1a	2.24598e-71	2.53225	0.21	0.047	6.11043e-67
Gli1	3.56177e-71	1.84126	0.216	0.048	9.69014e-67
Kcnh7	4.12444e-71	-3.7774	0.142	0.493	1.12209e-66
Elavl3	9.76654e-71	-2.91493	0.089	0.461	2.65708e-66
Hoxb3	1.09617e-70	2.46036	0.36	0.131	2.98225e-66
Spock2	1.22685e-70	-2.32163	0.229	0.582	3.33777e-66
Plagl1	1.46307e-70	3.48584	0.337	0.122	3.98043e-66
Map2	2.17885e-70	-2.96385	0.097	0.474	5.92779e-66
Sntb1	2.55124e-70	-3.30483	0.081	0.455	6.94091e-66
Pbx3	2.6496e-70	1.75544	0.607	0.346	7.20851e-66
Hecw1	4.04193e-70	-3.85708	0.076	0.436	1.09965e-65
Gng2	6.57884e-70	-2.4878	0.096	0.487	1.78984e-65
Pcdh7	8.18505e-70	1.68921	0.721	0.512	2.22682e-65
Rbfox1	2.28013e-69	-2.3015	0.625	0.79	6.20331e-65
Fdft1	2.31473e-69	-2.49443	0.101	0.489	6.29745e-65
Podn	3.30441e-69	2.89849	0.147	0.025	8.98999e-65
Sox2ot	3.59094e-69	-3.70253	0.092	0.457	9.7695e-65
Ndrg4	5.68095e-69	-2.14135	0.305	0.629	1.54556e-64
Astn2	5.74181e-69	-2.97369	0.13	0.499	1.56212e-64
Fhl1	1.24783e-68	1.84827	0.586	0.35	3.39484e-64
Cygb	1.51482e-68	2.75292	0.281	0.085	4.12123e-64
Cntn1	1.71807e-68	-3.12764	0.111	0.475	4.67417e-64
Phf24	4.53565e-68	-2.67624	0.208	0.549	1.23397e-63
Reep1	5.00371e-68	-2.95689	0.101	0.46	1.36131e-63
Sec24d	8.96415e-68	1.83216	0.508	0.248	2.43879e-63
Pcbp3	9.3976e-68	-2.4884	0.177	0.526	2.55671e-63
N4bp2	9.99715e-68	2.80301	0.314	0.106	2.71982e-63
Unc80	1.17813e-67	-3.23512	0.059	0.427	3.20521e-63
Kcna2	1.33781e-67	-2.73559	0.116	0.494	3.63964e-63
Msi2	1.5174e-67	1.05623	0.871	0.686	4.12824e-63
Tshz2	3.08441e-67	0.670912	0.916	0.663	8.39145e-63
Tubb3	3.77282e-67	-1.98784	0.327	0.661	1.02643e-62
Klf3	5.47058e-67	1.89197	0.546	0.295	1.48833e-62
Piezo2	5.54313e-67	0.760364	0.896	0.668	1.50806e-62
Amph	9.36785e-67	-2.63926	0.087	0.461	2.54862e-62
Fap	1.14917e-66	2.57413	0.287	0.087	3.12643e-62
Hmgcs1	1.38796e-66	-2.03026	0.219	0.579	3.7761e-62
Nfat5	1.42936e-66	1.14255	0.785	0.608	3.88872e-62
Slc9a9	1.76206e-66	-2.4522	0.307	0.603	4.79385e-62
Pmepa1	2.9578e-66	0.915239	0.766	0.439	8.047e-62
Kcnip3	6.8415e-66	-2.97227	0.068	0.431	1.8613e-61
Grb14	8.34009e-66	-3.01175	0.071	0.436	2.269e-61
Thbs2	1.03536e-65	2.99177	0.119	0.018	2.81679e-61
Fgf12	1.43556e-65	-3.17412	0.234	0.555	3.90559e-61
Robo2	1.52439e-65	-3.23002	0.111	0.46	4.14726e-61
Ppm1l	1.73526e-65	-1.86493	0.215	0.575	4.72095e-61
Lrrk1	2.47368e-65	1.90566	0.386	0.149	6.72991e-61
Scg3	4.12074e-65	-2.47582	0.18	0.533	1.12109e-60
Syt1	1.62379e-64	-3.10293	0.185	0.512	4.41768e-60
Clmp	1.79604e-64	1.70663	0.488	0.232	4.8863e-60
Stmn2	3.48331e-64	-1.71042	0.434	0.692	9.47668e-60
Cntln	3.55327e-64	1.54072	0.622	0.384	9.66703e-60
Map1b	4.7087e-64	-1.80206	0.906	0.939	1.28105e-59
Ralyl	9.24852e-64	-3.78877	0.117	0.455	2.51615e-59
Irs1	1.10928e-63	2.19682	0.414	0.175	3.0179e-59
Rims1	2.27029e-63	-3.14134	0.119	0.459	6.17656e-59
Prps2	3.49073e-63	3.39929	0.223	0.06	9.49687e-59
Rab7b	4.88894e-63	2.44615	0.153	0.029	1.33008e-58
Ppp1r1c	5.12954e-63	-2.80043	0.097	0.444	1.39554e-58
Nedd4l	9.96981e-63	-2.02621	0.35	0.641	2.71239e-58
Sik1	1.08492e-62	3.08589	0.188	0.044	2.95164e-58
Myt1l	1.24907e-62	-3.62175	0.083	0.419	3.39822e-58
Trim36	1.38909e-62	-2.79606	0.081	0.429	3.77917e-58
Epb41l2	2.41056e-62	1.05201	0.751	0.486	6.55817e-58
Mast4	2.80962e-62	2.08568	0.573	0.342	7.64384e-58
Npas3	3.07747e-62	-2.84488	0.104	0.455	8.37257e-58
Kif5c	3.09399e-62	-2.20178	0.196	0.536	8.4175e-58
Rab3c	4.95991e-62	-3.45981	0.056	0.397	1.34939e-57
Marveld1	5.89458e-62	2.24556	0.325	0.116	1.60368e-57
Fzd7	6.2648e-62	2.82882	0.165	0.034	1.7044e-57
Ppp1r9a	8.35411e-62	-2.38582	0.17	0.521	2.27282e-57
Zmiz1	9.13574e-62	1.28706	0.71	0.5	2.48547e-57
Gabbr2	9.75222e-62	-3.27836	0.087	0.42	2.65319e-57
Smo	1.93058e-61	1.73153	0.355	0.128	5.25233e-57
Abca8b	3.00979e-61	-3.40796	0.099	0.445	8.18844e-57
Kcnab2	3.98873e-61	-2.30297	0.145	0.495	1.08517e-56
L1cam	6.27604e-61	-2.61823	0.086	0.436	1.70746e-56
Dock3	6.29998e-61	-3.52617	0.061	0.396	1.71397e-56
Itga5	7.35563e-61	2.42203	0.201	0.049	2.00117e-56
Itga7	7.8134e-61	-3.14345	0.043	0.388	2.12571e-56
Tmod2	8.11219e-61	-1.63435	0.29	0.629	2.207e-56
Ppp1r12b	8.68386e-61	1.29834	0.688	0.459	2.36253e-56
Gm26871	1.64985e-60	-3.73119	0.17	0.476	4.48857e-56
Ptpn14	2.19536e-60	1.31003	0.426	0.171	5.9727e-56
Fmn2	2.33501e-60	-3.00633	0.068	0.41	6.35262e-56
Tnik	2.50623e-60	-1.98298	0.168	0.526	6.81845e-56
Uchl1	2.52527e-60	-1.52229	0.477	0.739	6.87025e-56
Ahnak	3.25417e-60	0.86136	0.866	0.672	8.85328e-56
Fmo1	3.90746e-60	1.72216	0.442	0.188	1.06306e-55
Itgb5	4.78409e-60	1.69159	0.388	0.155	1.30156e-55
Pkp4	4.89188e-60	1.69284	0.554	0.322	1.33089e-55
Angpt1	5.03827e-60	2.86481	0.276	0.09	1.37071e-55
Rnf157	6.05004e-60	-2.55872	0.089	0.439	1.64597e-55
Rgs7	7.10797e-60	-3.53571	0.087	0.419	1.93379e-55
Sema3c	8.68297e-60	2.61225	0.335	0.127	2.36229e-55
Cdr1os	8.89982e-60	-3.45538	0.064	0.397	2.42129e-55
Medag	1.31385e-59	3.08303	0.177	0.04	3.57447e-55
5330434G04Rik	1.53554e-59	-3.86018	0.038	0.365	4.1776e-55
Dgkh	1.94793e-59	-2.32157	0.434	0.665	5.29953e-55
Tnxb	2.12244e-59	1.77114	0.446	0.195	5.7743e-55
Ext1	2.58725e-59	0.929187	0.843	0.644	7.03887e-55
Chl1	2.88429e-59	-3.24712	0.066	0.402	7.847e-55
Kif1b	3.09466e-59	-1.06533	0.784	0.881	8.41932e-55
Rab6b	3.6902e-59	-1.77832	0.315	0.617	1.00396e-54
Ppp2r2c	4.25736e-59	-2.65403	0.063	0.405	1.15826e-54
Zfp536	4.77122e-59	-2.74451	0.119	0.457	1.29806e-54
Aff3	4.84515e-59	0.958159	0.771	0.507	1.31817e-54
Nefm	5.7677e-59	-2.31878	0.495	0.762	1.56916e-54
Dpyd	9.64648e-59	-2.14937	0.188	0.529	2.62442e-54
Ank	9.69183e-59	-1.05183	0.153	0.522	2.63676e-54
Add2	9.83216e-59	-2.89425	0.071	0.407	2.67494e-54
Tmem164	1.31069e-58	1.26358	0.691	0.471	3.56587e-54
Calm1	1.34203e-58	-1.61943	0.663	0.838	3.65111e-54
Kctd12	1.42108e-58	2.95703	0.137	0.026	3.86618e-54
Palmd	1.43928e-58	1.75947	0.551	0.324	3.91571e-54
Igsf11	1.5608e-58	-3.56152	0.056	0.384	4.2463e-54
Nox4	1.76658e-58	4.5559	0.183	0.045	4.80614e-54
Hacd4	1.92303e-58	2.51849	0.172	0.038	5.2318e-54
Ppp2r2b	2.26539e-58	-2.10351	0.157	0.497	6.16322e-54
Prex2	3.9849e-58	-3.14077	0.086	0.416	1.08413e-53
Fgf13	5.32763e-58	-1.89916	0.162	0.499	1.44943e-53
Cacna1b	6.26476e-58	-3.35752	0.056	0.38	1.70439e-53
Arfgef3	6.62656e-58	-2.75109	0.084	0.415	1.80282e-53
Kcna6	7.20691e-58	-3.13721	0.046	0.377	1.96071e-53
Dlg1	7.61116e-58	1.31695	0.629	0.386	2.07069e-53
Prelp	1.08601e-57	2.47219	0.134	0.024	2.95459e-53
Tuba1a	1.11569e-57	-1.63729	0.592	0.795	3.03535e-53
Nrg3	1.11693e-57	-3.6076	0.219	0.506	3.03872e-53
Kcnip4	1.26379e-57	-3.50055	0.302	0.577	3.43826e-53
Nrcam	1.3412e-57	-3.16941	0.061	0.39	3.64888e-53
Sema6d	1.39631e-57	-2.70706	0.158	0.479	3.79881e-53
Hspa12b	1.80175e-57	2.9772	0.153	0.032	4.90185e-53
Plp1	2.61012e-57	-2.68769	0.129	0.463	7.1011e-53
Msmo1	2.65748e-57	-2.33515	0.099	0.444	7.22993e-53
Scn7a	3.14581e-57	-2.45705	0.124	0.463	8.55849e-53
Srsf11	3.6851e-57	1.15949	0.764	0.596	1.00257e-52
Spire1	3.71601e-57	-2.01088	0.139	0.493	1.01098e-52
Aox1	4.29844e-57	1.83773	0.508	0.28	1.16943e-52
Zfp423	5.07468e-57	1.62924	0.526	0.289	1.38062e-52
Mllt3	5.44822e-57	1.2569	0.731	0.558	1.48224e-52
Afap1	7.97459e-57	1.77621	0.508	0.281	2.16957e-52
Bhlhe40	8.22468e-57	2.41291	0.259	0.082	2.23761e-52
Atp6v0a4	9.74544e-57	3.63623	0.16	0.036	2.65134e-52
Nrg1	1.29858e-56	-3.30926	0.142	0.458	3.53291e-52
Mbnl1	1.59865e-56	1.04481	0.807	0.647	4.3493e-52
Wwc2	1.78562e-56	1.35941	0.559	0.302	4.85796e-52
C78859	2.60253e-56	-3.95219	0.043	0.355	7.08046e-52
Snrpn	2.89342e-56	-1.93573	0.196	0.526	7.87185e-52
Dock10	3.00539e-56	-1.72853	0.271	0.608	8.17646e-52
Hoxc8	3.01193e-56	2.74827	0.31	0.118	8.19426e-52
Fto	3.90405e-56	1.01958	0.769	0.58	1.06213e-51
Gsn	4.17467e-56	1.8414	0.566	0.341	1.13576e-51
Nefl	4.25301e-56	-2.04376	0.632	0.819	1.15707e-51
Ramp2	4.35472e-56	2.27793	0.228	0.065	1.18474e-51
Cxcl16	7.3008e-56	2.96684	0.135	0.026	1.98626e-51
Srgap1	7.521e-56	-1.86889	0.165	0.506	2.04616e-51
Il17ra	8.90643e-56	2.08538	0.193	0.049	2.42308e-51
Hnrnph1	1.14084e-55	1.29825	0.678	0.485	3.10377e-51
Ptprz1	1.17396e-55	-3.38628	0.071	0.389	3.19387e-51
Epha4	1.31109e-55	2.29358	0.234	0.069	3.56695e-51
Mical3	2.28554e-55	1.04565	0.774	0.583	6.21804e-51
Grid1	3.0296e-55	-3.40586	0.069	0.385	8.24233e-51
Pdgfra	5.36173e-55	2.33821	0.185	0.046	1.45871e-50
Parm1	6.57934e-55	-2.15599	0.158	0.483	1.78997e-50
Grik3	6.94722e-55	-1.95215	0.16	0.508	1.89006e-50
St6gal1	7.15619e-55	-1.71419	0.229	0.574	1.94691e-50
Hspa12a	8.67156e-55	-1.50883	0.282	0.612	2.35919e-50
Trarg1	9.95218e-55	-2.57188	0.101	0.428	2.70759e-50
Art3	9.99658e-55	-3.57253	0.063	0.375	2.71967e-50
Apbb2	1.01857e-54	1.00149	0.764	0.579	2.77112e-50
Elovl7	1.17711e-54	-2.82044	0.05	0.367	3.20245e-50
Rbfox3	1.93992e-54	-2.22766	0.127	0.454	5.27776e-50
Zfyve28	2.33859e-54	-2.95161	0.056	0.374	6.36237e-50
Dpp6	2.47828e-54	-2.94948	0.284	0.551	6.7424e-50
Cacna1a	2.49743e-54	-2.08605	0.208	0.515	6.79451e-50
Fdps	3.24024e-54	-2.1726	0.109	0.445	8.81539e-50
Garnl3	3.70999e-54	-2.30393	0.142	0.458	1.00934e-49
Itga11	3.89363e-54	3.05079	0.238	0.075	1.0593e-49
Id2	4.52631e-54	2.47617	0.328	0.133	1.23143e-49
Map7d2	5.25659e-54	-2.12727	0.233	0.559	1.43011e-49
Slc4a4	5.83995e-54	0.896133	0.812	0.608	1.58882e-49
Lhfpl4	7.28055e-54	-2.69659	0.069	0.391	1.98075e-49
Cdkn1c	7.49704e-54	2.62681	0.114	0.019	2.03965e-49
Ppargc1a	9.02991e-54	-3.49272	0.043	0.354	2.45668e-49
Kctd16	1.07093e-53	-3.94724	0.137	0.431	2.91359e-49
Aldh1a1	1.16892e-53	2.82023	0.2	0.055	3.18015e-49
Acot7	1.49539e-53	-2.13965	0.125	0.455	4.06835e-49
Cyth3	1.91223e-53	1.52206	0.587	0.378	5.20241e-49
Scn10a	1.92842e-53	-3.16225	0.147	0.442	5.24647e-49
Limch1	2.20894e-53	-2.30165	0.144	0.471	6.00965e-49
Abca8a	2.99881e-53	-2.77812	0.145	0.457	8.15856e-49
Sh3rf3	3.07311e-53	1.68261	0.404	0.177	8.3607e-49
Kcnt2	4.6924e-53	1.88112	0.363	0.15	1.27662e-48
Trim9	4.70881e-53	-3.40036	0.036	0.343	1.28108e-48
Pacsin1	5.50887e-53	-2.32938	0.102	0.427	1.49874e-48
Megf9	5.79626e-53	-1.94918	0.177	0.514	1.57693e-48
Cnksr2	7.23237e-53	-3.02801	0.051	0.362	1.96764e-48
9530026P05Rik	7.54273e-53	1.11418	0.682	0.443	2.05207e-48
Gria4	8.12469e-53	-2.30834	0.107	0.429	2.2104e-48
Ano3	9.88753e-53	-2.89033	0.122	0.436	2.69e-48
Pla2g7	1.24961e-52	-2.46842	0.066	0.384	3.39969e-48
Rev3l	1.45731e-52	1.26858	0.65	0.438	3.96475e-48
Pcsk5	1.53422e-52	1.36087	0.607	0.346	4.17399e-48
Hdac4	1.9184e-52	1.38649	0.634	0.437	5.21919e-48
Meg3	1.94157e-52	-2.62296	0.653	0.783	5.28223e-48
Gab2	2.25384e-52	1.01837	0.731	0.51	6.13181e-48
Epb41l4b	2.89106e-52	-2.65174	0.087	0.402	7.86543e-48
Spata13	3.0869e-52	-2.08959	0.135	0.466	8.39822e-48
Dpysl5	3.39812e-52	-3.54731	0.038	0.339	9.24492e-48
Pgm2l1	3.45633e-52	-2.27769	0.157	0.471	9.4033e-48
Cacnb4	4.12764e-52	-2.40759	0.14	0.451	1.12296e-47
Acss2	4.6647e-52	-2.67344	0.071	0.388	1.26908e-47
Adamts1	5.17108e-52	2.70169	0.191	0.052	1.40684e-47
Ptpre	6.37653e-52	-2.52184	0.079	0.393	1.7348e-47
Pirt	7.1327e-52	-2.34603	0.139	0.453	1.94052e-47
Ctnnal1	8.17055e-52	-2.18222	0.155	0.48	2.22288e-47
Osbpl3	9.26274e-52	-2.45278	0.178	0.47	2.52002e-47
Pag1	1.07894e-51	-2.16441	0.117	0.442	2.93536e-47
Cpeb2	1.27251e-51	-1.82866	0.155	0.491	3.46199e-47
Map1a	1.38165e-51	-2.1677	0.414	0.658	3.75892e-47
Sox6	1.57633e-51	-3.12489	0.084	0.388	4.28857e-47
Csrnp3	1.66943e-51	-2.96262	0.061	0.366	4.54185e-47
Gnal	1.83162e-51	-2.54094	0.125	0.436	4.9831e-47
Ppic	2.43495e-51	2.63861	0.117	0.021	6.62452e-47
Stmn3	2.52986e-51	-1.62994	0.208	0.543	6.88275e-47
Cdc42ep5	2.82509e-51	2.87134	0.124	0.024	7.68595e-47
Zbtb20	2.86337e-51	0.50617	0.993	0.932	7.79009e-47
Nalcn	3.47602e-51	1.55255	0.517	0.295	9.45687e-47
Ywhag	3.62047e-51	-1.81008	0.413	0.658	9.84985e-47
Zc3h11a.1	3.91809e-51	1.10927	0.728	0.554	1.06595e-46
Mfsd6	4.72833e-51	-2.56198	0.064	0.375	1.28639e-46
Arhgap28	5.01868e-51	-2.58625	0.091	0.4	1.36538e-46
Atp8a2	5.34575e-51	-2.55406	0.122	0.435	1.45436e-46
Csrp2	5.4505e-51	2.53383	0.228	0.071	1.48286e-46
Fndc1	5.82039e-51	2.83474	0.211	0.063	1.5835e-46
Snhg14	6.92425e-51	-2.93264	0.112	0.415	1.88381e-46
Lrfn5	8.04959e-51	-3.50686	0.083	0.379	2.18997e-46
Antxr1	8.63043e-51	1.61771	0.546	0.315	2.348e-46
Nrp1	8.77051e-51	1.23813	0.518	0.269	2.38611e-46
Rufy3	8.8957e-51	-1.26624	0.388	0.666	2.42017e-46
Cdh2	9.3036e-51	-1.77671	0.111	0.433	2.53114e-46
Dgki	1.21316e-50	-4.18206	0.125	0.418	3.30052e-46
Dpp10	1.25333e-50	-3.5023	0.162	0.458	3.4098e-46
Rph3a	1.78855e-50	-2.54701	0.086	0.393	4.86592e-46
Rab43	1.81739e-50	1.97271	0.408	0.202	4.94438e-46
Irak3	1.91323e-50	2.50202	0.249	0.084	5.20512e-46
Egflam	2.38998e-50	2.00596	0.274	0.096	6.50217e-46
Tspan7	2.62131e-50	-2.06389	0.109	0.43	7.13154e-46
Zcchc24	2.83111e-50	1.41449	0.426	0.192	7.70232e-46
Tmod3	2.91386e-50	1.39029	0.576	0.361	7.92743e-46
Mdfic	3.45248e-50	1.15529	0.365	0.143	9.39283e-46
Ism1	3.55358e-50	4.46907	0.145	0.033	9.66786e-46
Syn2	3.59134e-50	-2.62643	0.064	0.37	9.7706e-46
Unc79	3.59974e-50	-3.70279	0.043	0.333	9.79347e-46
Rapgef5	3.93269e-50	-2.8326	0.064	0.369	1.06993e-45
Magi1	4.29153e-50	-1.27659	0.417	0.693	1.16755e-45
Sorbs2	4.63399e-50	-3.29587	0.074	0.374	1.26072e-45
Osgin2	5.11205e-50	2.5257	0.289	0.11	1.39079e-45
Plekhg3	5.16286e-50	1.82104	0.414	0.199	1.40461e-45
Glis2	5.22697e-50	2.42011	0.31	0.125	1.42205e-45
Adamtsl4	6.44389e-50	2.43915	0.231	0.073	1.75312e-45
Tll1	8.41389e-50	1.98507	0.264	0.09	2.28908e-45
B4galt6	1.24648e-49	-2.67164	0.045	0.346	3.39117e-45
Bcl2	1.546e-49	-1.92034	0.215	0.529	4.20605e-45
Fcho2	1.84272e-49	1.18076	0.644	0.445	5.01331e-45
Avil	1.8725e-49	-1.95172	0.172	0.476	5.09433e-45
Asic2	2.14105e-49	-3.46389	0.186	0.467	5.82494e-45
Car10	3.85834e-49	-3.62168	0.071	0.362	1.0497e-44
Fads2	3.8712e-49	-2.1874	0.106	0.42	1.0532e-44
Prickle2	4.66732e-49	-1.88661	0.163	0.473	1.26979e-44
Stox2	4.70235e-49	-1.93118	0.236	0.556	1.27932e-44
D130009I18Rik	4.96751e-49	-3.34759	0.134	0.424	1.35146e-44
Scn11a	5.14175e-49	-3.2934	0.073	0.362	1.39887e-44
Prkar1b	5.74071e-49	-2.29204	0.12	0.425	1.56182e-44
Kcnh8	5.97539e-49	-3.77061	0.045	0.332	1.62566e-44
Efr3b	8.28712e-49	-3.33329	0.028	0.315	2.25459e-44
Snap91	9.41945e-49	-2.47698	0.096	0.393	2.56266e-44
Sncg	1.12893e-48	-1.43226	0.515	0.755	3.07136e-44
Syt7	1.15386e-48	-2.95782	0.092	0.387	3.13918e-44
Atp8a1	1.49905e-48	-1.17312	0.523	0.745	4.07831e-44
Abi3bp	1.76616e-48	1.78294	0.353	0.149	4.80502e-44
Dhcr24	1.89045e-48	-2.226	0.101	0.409	5.14316e-44
Tppp3	2.49045e-48	-1.57779	0.325	0.617	6.77551e-44
Tspan5	2.54936e-48	0.974983	0.726	0.508	6.93578e-44
Rarb	2.71928e-48	1.63439	0.47	0.244	7.39808e-44
Dgkz	2.82768e-48	-2.08405	0.236	0.522	7.69299e-44
Col28a1	2.90293e-48	-3.87355	0.048	0.331	7.89772e-44
Fbxl2	2.97622e-48	-3.19807	0.036	0.324	8.0971e-44
Caskin1	3.26219e-48	-3.23778	0.038	0.326	8.87512e-44
Lamb1	3.87632e-48	-3.42635	0.051	0.336	1.05459e-43
Wwtr1	3.91329e-48	1.27794	0.477	0.236	1.06465e-43
Crmp1	4.49525e-48	-2.85249	0.045	0.334	1.22298e-43
Ywhah	4.64614e-48	-1.68412	0.345	0.618	1.26403e-43
Ppp1r14c	4.73191e-48	-3.63795	0.048	0.332	1.28736e-43
Cldn11	5.41303e-48	1.90834	0.172	0.044	1.47267e-43
Pdlim5	5.49815e-48	1.33974	0.596	0.371	1.49583e-43
Spock1	6.06117e-48	-3.08489	0.071	0.359	1.649e-43
Ralgps1	6.15041e-48	-2.42107	0.064	0.361	1.67328e-43
Med12l	7.27002e-48	-2.68661	0.059	0.353	1.97788e-43
Nfatc1	8.07861e-48	1.61406	0.262	0.089	2.19787e-43
Itga6	8.244e-48	-3.21549	0.053	0.341	2.24286e-43
Rbms3	9.04294e-48	-1.02404	0.865	0.869	2.46022e-43
Fez1	1.0795e-47	-2.37972	0.087	0.39	2.93689e-43
Il33	1.08474e-47	2.93622	0.2	0.059	2.95114e-43
Tafa1	1.18346e-47	-3.85476	0.071	0.359	3.21971e-43
Ap3b2	1.2107e-47	-2.62755	0.059	0.354	3.29383e-43
Syn1	1.23402e-47	-2.20359	0.107	0.408	3.35726e-43
Mfap3l	1.85116e-47	-3.35981	0.036	0.319	5.03628e-43
Hmgcr	2.06302e-47	-1.93134	0.109	0.421	5.61265e-43
Cers4	2.1888e-47	-1.4857	0.107	0.428	5.95484e-43
Cds2	2.32006e-47	-2.05522	0.18	0.478	6.31196e-43
Atp1a1	2.48732e-47	-1.65083	0.465	0.68	6.76701e-43
Atp1a2	3.09267e-47	-1.61858	0.165	0.469	8.41393e-43
Neo1	3.15828e-47	1.90064	0.477	0.282	8.59242e-43
Mbp	3.49231e-47	-2.03562	0.206	0.522	9.50118e-43
Ptprf	5.59145e-47	-1.37961	0.325	0.604	1.52121e-42
Sv2b	6.1919e-47	-3.07552	0.041	0.325	1.68457e-42
Nek1	7.17238e-47	-1.49094	0.337	0.605	1.95132e-42
Tox	7.83847e-47	-3.10943	0.068	0.35	2.13254e-42
Cited2	8.36306e-47	2.998	0.162	0.042	2.27525e-42
Dync1i2	9.31197e-47	-1.1092	0.566	0.741	2.53342e-42
1500004A13Rik	1.01818e-46	-2.38998	0.074	0.369	2.77007e-42
Rian	1.16791e-46	-2.29021	0.218	0.487	3.17741e-42
Lgi1	1.17905e-46	-2.88722	0.054	0.341	3.20772e-42
Sh3kbp1	1.69661e-46	-1.95155	0.163	0.467	4.6158e-42
Syne2	1.74102e-46	1.09194	0.667	0.445	4.73662e-42
Bbs9	1.8034e-46	1.36923	0.602	0.4	4.90633e-42
Srsf5	2.06236e-46	0.913556	0.782	0.644	5.61085e-42
Slc6a6	2.08418e-46	1.66787	0.408	0.199	5.67022e-42
Lpp	3.49615e-46	0.742834	0.842	0.723	9.51161e-42
Asap1	3.90863e-46	-1.14363	0.472	0.721	1.06338e-41
Syt4	3.9433e-46	-2.19058	0.132	0.429	1.07281e-41
Pcdhac2	3.97262e-46	-2.07874	0.094	0.397	1.08079e-41
Tcf12	4.0662e-46	0.766392	0.794	0.612	1.10625e-41
Tmod1	4.41023e-46	-2.49094	0.051	0.339	1.19985e-41
Hoxb9	4.77883e-46	2.62477	0.185	0.053	1.30013e-41
Rtn4	5.15322e-46	-1.09862	0.569	0.758	1.40198e-41
Grm7	5.2394e-46	-3.17335	0.165	0.436	1.42543e-41
Atl1	6.19957e-46	-2.08468	0.097	0.4	1.68666e-41
Jph4	7.31163e-46	-2.42674	0.056	0.344	1.9892e-41
Tmcc3	8.32354e-46	1.37814	0.536	0.326	2.2645e-41
Gm49678	9.94184e-46	-4.30175	0.048	0.317	2.70478e-41
Smg6	1.1746e-45	1.07821	0.7	0.528	3.19563e-41
Sult4a1	1.30582e-45	-2.08989	0.149	0.447	3.5526e-41
Slc6a7	1.50806e-45	3.69182	0.132	0.03	4.10284e-41
Jakmip2	1.79475e-45	-3.2097	0.036	0.311	4.88281e-41
Kcna1	1.88778e-45	-2.65342	0.091	0.379	5.1359e-41
Mecom	1.992e-45	1.90071	0.239	0.082	5.41944e-41
Clgn	2.44378e-45	-2.92573	0.036	0.312	6.64855e-41
Lrrn1	3.1246e-45	-2.87393	0.056	0.335	8.50078e-41
Brsk2	3.23435e-45	-3.04908	0.021	0.292	8.79938e-41
Hoxb5	3.29344e-45	2.08962	0.307	0.127	8.96012e-41
Ttc9	3.44461e-45	-2.53658	0.058	0.344	9.37142e-41
Mapre2	4.35889e-45	-1.33902	0.368	0.646	1.18588e-40
Arhgap26	4.38582e-45	-1.51145	0.282	0.575	1.19321e-40
Dok6	7.9013e-45	-2.32155	0.071	0.358	2.14963e-40
Ttyh1	8.82271e-45	-3.5961	0.043	0.311	2.40031e-40
Plcl1	9.21862e-45	1.1242	0.487	0.257	2.50802e-40
Frmpd1	9.38256e-45	-3.11685	0.043	0.316	2.55262e-40
Thsd4	9.59123e-45	1.91009	0.475	0.28	2.60939e-40
Grik1	2.04915e-44	-4.04444	0.215	0.484	5.57492e-40
Ank1	2.95335e-44	-2.42664	0.081	0.364	8.03487e-40
Tbc1d9	3.69617e-44	-3.20049	0.035	0.303	1.00558e-39
Pcsk2	3.9838e-44	-2.02974	0.195	0.472	1.08383e-39
Onecut2	4.71945e-44	-2.63459	0.064	0.341	1.28397e-39
Atp1b3	5.40445e-44	-1.51755	0.203	0.503	1.47033e-39
Srek1	5.44874e-44	0.994238	0.744	0.572	1.48238e-39
Srrm3	6.34285e-44	-2.84265	0.046	0.318	1.72563e-39
Il15	6.54619e-44	1.7295	0.198	0.059	1.78096e-39
Rap1gap	6.73811e-44	-2.54988	0.053	0.329	1.83317e-39
Nwd2	9.59887e-44	-3.45573	0.05	0.316	2.61147e-39
Fign	1.06437e-43	-2.15658	0.177	0.458	2.89572e-39
Rcn3	1.14136e-43	2.47317	0.158	0.041	3.10519e-39
Zfp950	1.14272e-43	1.19975	0.601	0.411	3.10889e-39
Syngr1	1.15708e-43	-2.2464	0.074	0.361	3.14795e-39
Ggt7	1.1681e-43	-3.0028	0.02	0.283	3.17793e-39
Dock4	1.22458e-43	1.05623	0.662	0.447	3.33159e-39
Aig1	1.27624e-43	-1.55108	0.144	0.452	3.47213e-39
Peg3	1.36343e-43	-1.80922	0.173	0.457	3.70936e-39
Baz2b	1.60057e-43	0.719189	0.845	0.699	4.3545e-39
Prkd1	3.46225e-43	-1.90514	0.155	0.44	9.4194e-39
Kif13a	3.96364e-43	1.24436	0.632	0.456	1.07835e-38
Coro2a	4.73707e-43	-2.59042	0.043	0.314	1.28877e-38
Dmd	4.79525e-43	-1.58257	0.462	0.688	1.3046e-38
Zcchc18	4.90437e-43	-2.41901	0.073	0.352	1.33428e-38
Mapk8ip1	7.02414e-43	-1.68596	0.12	0.418	1.91099e-38
Sult1a1	8.55206e-43	1.69528	0.213	0.067	2.32667e-38
Ppp3ca	8.83674e-43	-0.915781	0.744	0.869	2.40412e-38
Sik2	9.07018e-43	1.36009	0.447	0.23	2.46763e-38
Ptprd	9.53807e-43	0.287278	0.706	0.444	2.59493e-38
Nfkbia	9.72139e-43	1.77051	0.401	0.205	2.6448e-38
Sgpp2	9.9156e-43	-2.79634	0.041	0.308	2.69764e-38
Apc2	1.12919e-42	-2.37475	0.053	0.328	3.07208e-38
Pou4f1	1.4858e-42	-2.29233	0.087	0.368	4.04227e-38
Ncoa7	2.26582e-42	-1.31045	0.277	0.562	6.1644e-38
Cntn2	2.28446e-42	-2.38764	0.054	0.327	6.2151e-38
Prkar2b	2.76518e-42	-2.69564	0.073	0.344	7.52294e-38
Rgs4	3.04459e-42	-2.10588	0.188	0.47	8.28311e-38
Dclk1	3.43158e-42	1.11667	0.705	0.511	9.33594e-38
Cavin2	4.00291e-42	2.11858	0.153	0.04	1.08903e-37
Cadm2	4.05019e-42	-1.78823	0.236	0.518	1.10189e-37
Sp100	4.1622e-42	1.37536	0.323	0.137	1.13237e-37
A4galt	4.26336e-42	1.80639	0.365	0.178	1.15989e-37
Cplx1	4.29171e-42	-1.87532	0.147	0.442	1.1676e-37
Armh4	4.47912e-42	-2.59707	0.064	0.333	1.21859e-37
Rhobtb3	5.02539e-42	-2.39889	0.061	0.333	1.36721e-37
Mast1	5.03039e-42	-2.48758	0.043	0.311	1.36857e-37
Tuba1b	7.08895e-42	-1.57666	0.266	0.545	1.92862e-37
Apoe	7.2485e-42	-1.34639	0.361	0.655	1.97203e-37
Nrn1	7.61721e-42	-1.95374	0.114	0.396	2.07234e-37
Slc43a2	8.33147e-42	-2.17213	0.078	0.358	2.26666e-37
Septin3	8.48339e-42	-2.85944	0.041	0.305	2.30799e-37
Hoxc9	9.37133e-42	2.39479	0.322	0.149	2.54956e-37
Agbl4	1.01255e-41	-3.03092	0.079	0.342	2.75475e-37
Dennd4a	1.03408e-41	1.3356	0.571	0.388	2.81332e-37
Cend1	1.13078e-41	-2.34155	0.073	0.347	3.07641e-37
Serpinh1	1.34915e-41	1.97971	0.233	0.082	3.6705e-37
Nfasc	1.49467e-41	-2.13083	0.099	0.38	4.06641e-37
Cdh6	1.69937e-41	-3.04599	0.054	0.315	4.6233e-37
Scg5	2.08248e-41	-2.68625	0.046	0.311	5.66561e-37
Nipal3	2.6026e-41	-1.87158	0.134	0.416	7.08062e-37
Gdap1	2.74862e-41	-2.27213	0.05	0.318	7.47791e-37
Stmn1	3.21098e-41	-2.03241	0.107	0.388	8.73579e-37
Gfra1	3.30121e-41	-3.18303	0.066	0.332	8.98126e-37
Eef1a2	3.37613e-41	-1.99878	0.129	0.41	9.18511e-37
Mapk4	3.73523e-41	-2.72613	0.078	0.343	1.01621e-36
Smim14	4.49312e-41	1.07855	0.653	0.477	1.2224e-36
Mapk8ip2	4.80622e-41	-2.00487	0.111	0.391	1.30758e-36
D130043K22Rik	4.99766e-41	-2.79488	0.038	0.295	1.35966e-36
Ccdc92	5.22346e-41	-1.86162	0.112	0.396	1.42109e-36
Gabra2	5.95973e-41	-3.39644	0.041	0.295	1.6214e-36
Ogt	6.26371e-41	0.858462	0.723	0.575	1.7041e-36
Isl1	9.01531e-41	-2.23087	0.045	0.309	2.4527e-36
Tmem131l	9.11479e-41	-2.75304	0.053	0.312	2.47977e-36
Sparcl1	9.40693e-41	-1.89292	0.132	0.409	2.55925e-36
Aff2	9.53548e-41	2.25829	0.399	0.217	2.59422e-36
Nsdhl	1.00968e-40	-2.02421	0.106	0.388	2.74693e-36
A830018L16Rik	1.19417e-40	-2.96885	0.083	0.341	3.24886e-36
Nacc2	1.32682e-40	-1.45928	0.233	0.52	3.60975e-36
Nat8l	1.33818e-40	-2.18702	0.079	0.352	3.64066e-36
Psd3	1.37102e-40	1.21549	0.597	0.412	3.72999e-36
Spire2	1.39137e-40	-2.42568	0.036	0.295	3.78536e-36
Slc7a14	1.44908e-40	-3.05224	0.04	0.293	3.94237e-36
Gnao1	1.52278e-40	-1.49976	0.413	0.618	4.14288e-36
Arhgap29	1.77567e-40	1.49344	0.381	0.184	4.83088e-36
Myo5a	1.88033e-40	-1.61653	0.287	0.543	5.11562e-36
Fam189b	2.15145e-40	-1.75633	0.165	0.447	5.85325e-36
Gabrb3	2.15192e-40	-1.66693	0.061	0.322	5.8545e-36
Galnt14	2.2573e-40	-3.49525	0.04	0.289	6.14122e-36
Rbm39	2.66099e-40	0.645989	0.871	0.793	7.23949e-36
Xkr6	2.99113e-40	-2.3726	0.071	0.334	8.13767e-36
Kctd1	3.2661e-40	-2.479	0.097	0.365	8.88576e-36
Nefh	3.43172e-40	-2.36153	0.427	0.675	9.33632e-36
Kif3a	3.45617e-40	-1.53879	0.147	0.441	9.40286e-36
Slc17a6	3.75889e-40	-2.63305	0.038	0.294	1.02264e-35
Necab1	4.27186e-40	-2.87954	0.045	0.299	1.1622e-35
Wls	4.54736e-40	1.40462	0.455	0.256	1.23715e-35
Sgcz	4.59447e-40	-3.45183	0.206	0.453	1.24997e-35
Itga10	4.72274e-40	2.7727	0.144	0.038	1.28487e-35
Cadm3	4.84822e-40	-1.92195	0.087	0.362	1.31901e-35
Ccnd3	4.93709e-40	0.771658	0.495	0.273	1.34319e-35
Ski	5.61038e-40	1.14407	0.619	0.455	1.52636e-35
Ldlr	6.12359e-40	-1.48686	0.153	0.448	1.66598e-35
Tnfrsf21	6.15306e-40	-2.36226	0.054	0.314	1.674e-35
Casz1	6.24634e-40	-2.75028	0.068	0.325	1.69938e-35
Mgll	6.40539e-40	1.12944	0.566	0.368	1.74265e-35
Egfem1	6.56172e-40	-3.51163	0.074	0.324	1.78518e-35
Zmat4	7.84289e-40	-4.08526	0.035	0.279	2.13374e-35
Rundc3a	8.55038e-40	-2.21553	0.056	0.319	2.32622e-35
Jakmip1	9.48348e-40	-2.69788	0.036	0.288	2.58007e-35
Igf1	1.02101e-39	2.47633	0.177	0.053	2.77776e-35
Olfm1	1.06446e-39	-1.85313	0.144	0.423	2.89596e-35
Plxnd1	1.0963e-39	-2.45521	0.051	0.308	2.98259e-35
Slc6a15	1.20463e-39	-2.77816	0.03	0.279	3.27731e-35
Paqr8	1.23611e-39	-3.03933	0.048	0.3	3.36296e-35
Lamb2	1.29987e-39	1.60499	0.276	0.108	3.53642e-35
Epha3	1.34576e-39	3.8445	0.183	0.059	3.66127e-35
Smad7	1.49427e-39	2.63612	0.236	0.09	4.0653e-35
Bcan	1.51011e-39	-3.52057	0.033	0.277	4.10842e-35
Dok4	1.77112e-39	-2.07005	0.099	0.37	4.81852e-35
Synpr	1.82995e-39	-3.58507	0.054	0.301	4.97857e-35
Epb41	2.34468e-39	-1.76355	0.155	0.433	6.37893e-35
Sparc	2.39126e-39	0.919376	0.667	0.449	6.50566e-35
Napb	2.42923e-39	-1.63273	0.2	0.48	6.60896e-35
Scd1	2.88781e-39	-2.02821	0.12	0.392	7.85657e-35
Stag1	2.94316e-39	0.778208	0.769	0.611	8.00716e-35
Kcnt1	2.98007e-39	-3.50329	0.023	0.264	8.10758e-35
Pcnx2	3.90806e-39	-3.63826	0.015	0.25	1.06323e-34
Acly	4.0437e-39	-1.61834	0.144	0.43	1.10013e-34
Phlpp1	4.22375e-39	-1.70662	0.208	0.489	1.14911e-34
Sox10	5.25497e-39	-3.35182	0.041	0.283	1.42967e-34
Cabp1	6.01196e-39	-2.37877	0.073	0.33	1.63561e-34
Sema6a	6.60116e-39	-2.55783	0.053	0.302	1.79591e-34
Ankrd33b	7.15201e-39	2.05935	0.259	0.104	1.94577e-34
Kif3c	7.15272e-39	-1.49063	0.13	0.417	1.94597e-34
Vat1l	7.4744e-39	-2.6109	0.071	0.328	2.03348e-34
Wnk1	7.6578e-39	0.760025	0.802	0.685	2.08338e-34
C130071C03Rik	1.01959e-38	-4.11118	0.03	0.265	2.77389e-34
Slc36a1	1.19723e-38	-1.9983	0.112	0.383	3.25718e-34
Mmd2	1.28044e-38	-3.35821	0.045	0.286	3.48357e-34
Sqle	1.28348e-38	-2.08354	0.071	0.336	3.49184e-34
Elapor2	1.39082e-38	-2.80509	0.043	0.29	3.78388e-34
Mir124a-1hg	1.44674e-38	-3.72911	0.017	0.25	3.93601e-34
Reep5	1.47342e-38	-1.33633	0.406	0.641	4.00859e-34
Pakap.1	1.73997e-38	-1.22613	0.172	0.463	4.73377e-34
Wbp1l	1.91527e-38	1.71806	0.427	0.248	5.21067e-34
Klf13	2.04036e-38	-1.4821	0.186	0.473	5.55101e-34
Sms	2.15054e-38	-1.97556	0.064	0.326	5.85076e-34
Ikbke	2.18257e-38	2.18949	0.163	0.047	5.9379e-34
Ccser1	2.19744e-38	-2.45588	0.124	0.373	5.97835e-34
Mark1	2.26924e-38	2.09075	0.389	0.221	6.1737e-34
Colgalt2	2.36916e-38	-3.05229	0.035	0.276	6.44555e-34
C030017B01Rik	2.43577e-38	-3.01688	0.035	0.277	6.62674e-34
Gpam	2.48139e-38	-2.56007	0.134	0.393	6.75086e-34
Abcc4	3.53924e-38	2.3819	0.384	0.216	9.62886e-34
Hoxa9	3.63062e-38	2.25224	0.373	0.202	9.87745e-34
Gm1043	4.12627e-38	-3.71174	0.017	0.248	1.12259e-33
Kit	4.18308e-38	-3.5806	0.036	0.272	1.13805e-33
Abcg1	4.21327e-38	-2.89565	0.038	0.281	1.14626e-33
Ndst3	4.73201e-38	-3.73571	0.012	0.24	1.28739e-33
Plce1	4.86814e-38	0.320223	0.769	0.462	1.32443e-33
Evl	5.38526e-38	-1.6869	0.089	0.358	1.46511e-33
Cpne4	5.69714e-38	-2.7466	0.068	0.317	1.54996e-33
Gng11	5.93753e-38	2.17185	0.135	0.034	1.61537e-33
Gse1	6.04552e-38	1.56148	0.528	0.358	1.64474e-33
Unc13b	6.12578e-38	1.39551	0.523	0.336	1.66658e-33
Gm2115	8.37308e-38	-3.47078	0.04	0.277	2.27798e-33
Nbl1	9.60281e-38	1.68711	0.417	0.233	2.61254e-33
Grin1	1.11044e-37	-2.53247	0.031	0.272	3.02106e-33
Slc22a23	1.11395e-37	-3.11616	0.033	0.272	3.0306e-33
Pclo	1.2329e-37	-1.41536	0.333	0.555	3.35423e-33
Tmem86a	1.52945e-37	2.62519	0.162	0.048	4.16102e-33
Thoc2	1.7138e-37	0.963349	0.723	0.575	4.66255e-33
Sacs	1.76651e-37	-2.0102	0.079	0.338	4.80596e-33
Fgf2	1.90586e-37	1.66191	0.282	0.117	5.18508e-33
Marchf11	1.92912e-37	-3.90173	0.017	0.244	5.24836e-33
Camk2a	1.9776e-37	-2.90581	0.056	0.298	5.38025e-33
Nalf1	2.03211e-37	-3.25202	0.081	0.326	5.52856e-33
Hs3st1	2.2825e-37	2.12029	0.266	0.11	6.20978e-33
Sema4b	2.59316e-37	-2.21877	0.076	0.331	7.05494e-33
Ldlrad3	2.70156e-37	1.09608	0.495	0.284	7.34987e-33
Abca9	3.25478e-37	1.32026	0.262	0.102	8.85496e-33
Clip3	4.27638e-37	-1.62175	0.125	0.4	1.16343e-32
Map7	4.44672e-37	-2.04138	0.125	0.379	1.20977e-32
Ctnna3	4.89726e-37	-2.97806	0.153	0.415	1.33235e-32
Abcd3	5.4784e-37	1.49567	0.535	0.372	1.49045e-32
Prdm16	5.4966e-37	-1.42679	0.328	0.588	1.49541e-32
Son	5.8931e-37	0.414069	0.964	0.905	1.60328e-32
Hspa8	6.2228e-37	-1.27066	0.596	0.769	1.69297e-32
Isl2	6.57361e-37	-2.71045	0.038	0.277	1.78842e-32
Gulp1	7.12918e-37	0.486485	0.769	0.487	1.93956e-32
Nacad	8.08352e-37	-2.06015	0.063	0.315	2.1992e-32
Disp2	8.55788e-37	-2.40583	0.041	0.283	2.32826e-32
Asxl3	9.23767e-37	-2.61627	0.036	0.274	2.5132e-32
Nap1l5	1.00725e-36	-1.97732	0.091	0.348	2.74034e-32
Gpt2	1.17565e-36	-2.63475	0.041	0.281	3.19847e-32
Fmnl2	1.32796e-36	0.64937	0.863	0.725	3.61284e-32
Otud7a	1.36932e-36	-2.72299	0.092	0.333	3.72537e-32
Kcnh1	1.51788e-36	-2.64341	0.041	0.279	4.12955e-32
Lcp1	1.53209e-36	-2.62138	0.068	0.311	4.1682e-32
Ntrk2	1.53686e-36	-1.81109	0.198	0.458	4.18119e-32
Coro2b	1.55078e-36	-1.4301	0.13	0.409	4.21906e-32
Ankrd12	1.70739e-36	0.75353	0.851	0.761	4.64512e-32
Ncdn	1.80983e-36	-1.81269	0.135	0.401	4.92383e-32
Syp	2.19587e-36	-2.08706	0.068	0.317	5.97408e-32
Luc7l2	2.25432e-36	0.622211	0.878	0.754	6.13311e-32
Exoc4	2.31974e-36	0.636586	0.871	0.746	6.31108e-32
St6galnac3	2.82216e-36	-3.19676	0.073	0.309	7.67797e-32
Ttl	3.3123e-36	-1.80723	0.125	0.385	9.01145e-32
Acyp2	3.44405e-36	-1.29202	0.269	0.543	9.36988e-32
Ap1s2	3.67808e-36	-1.61857	0.099	0.366	1.00066e-31
Osbpl10	3.79402e-36	-2.85798	0.058	0.295	1.0322e-31
Slco4a1	3.96986e-36	3.58768	0.129	0.034	1.08004e-31
Aldoa	4.0538e-36	-1.36106	0.393	0.634	1.10288e-31
Acsl6	4.17034e-36	-2.88532	0.041	0.276	1.13458e-31
Ulk2	4.31742e-36	1.24804	0.601	0.442	1.1746e-31
Pde2a	4.41858e-36	-3.08079	0.028	0.257	1.20212e-31
Crispld1	4.83237e-36	1.95987	0.188	0.062	1.3147e-31
Cdh20	5.65746e-36	-4.17395	0.031	0.254	1.53917e-31
Kif26b	5.77412e-36	-2.64563	0.051	0.287	1.57091e-31
Gpr158	5.81054e-36	-2.97923	0.079	0.319	1.58082e-31
Kcnd3	5.90627e-36	-2.80687	0.091	0.337	1.60686e-31
Chn1	6.04215e-36	-1.91518	0.081	0.334	1.64383e-31
Ghr	6.13264e-36	1.64114	0.64	0.459	1.66845e-31
Il17rd	6.77422e-36	2.30627	0.243	0.099	1.84299e-31
Nr3c1	6.78345e-36	1.09156	0.578	0.394	1.84551e-31
Bcam	6.80069e-36	-1.67474	0.114	0.378	1.85019e-31
Aacs	7.05044e-36	-1.83006	0.071	0.324	1.91814e-31
Arhgap22	8.91566e-36	-3.64951	0.015	0.235	2.4256e-31
Filip1	9.71292e-36	-2.7209	0.066	0.309	2.6425e-31
Unc13a	9.72737e-36	-2.30321	0.048	0.287	2.64643e-31
Prrxl1	9.7341e-36	-2.20233	0.053	0.295	2.64826e-31
Cd59a	9.84775e-36	-2.19079	0.071	0.318	2.67918e-31
Wipf3	1.13412e-35	-2.67806	0.056	0.291	3.08549e-31
Hsp90aa1	1.14728e-35	-1.45342	0.5	0.704	3.12128e-31
Rgs3	1.16279e-35	-2.37154	0.087	0.33	3.1635e-31
Arhgdib	1.24938e-35	2.07871	0.117	0.028	3.39907e-31
Acsbg1	1.3058e-35	-3.245	0.05	0.278	3.55257e-31
Ctsh	1.30595e-35	1.38082	0.17	0.051	3.55298e-31
Stard13	1.47654e-35	-1.95918	0.512	0.678	4.01708e-31
Marchf3	1.50498e-35	1.29127	0.446	0.264	4.09445e-31
Ksr2	1.62238e-35	-2.44511	0.083	0.323	4.41385e-31
Hspa4l	1.78258e-35	-1.51595	0.16	0.424	4.8497e-31
Adam11	2.1448e-35	-2.49254	0.053	0.288	5.83516e-31
Bicdl1	2.15637e-35	-2.6924	0.028	0.256	5.86661e-31
Cracd	2.21835e-35	-1.56135	0.144	0.412	6.03523e-31
Rims3	2.34728e-35	-2.62275	0.051	0.286	6.38602e-31
Mir99ahg	2.4659e-35	0.232115	0.936	0.702	6.70872e-31
Atp2b2	2.60408e-35	-2.44028	0.073	0.312	7.08466e-31
Slc66a2	2.64785e-35	-2.14148	0.056	0.297	7.20374e-31
Gabarapl1	2.73327e-35	-1.54399	0.19	0.457	7.43613e-31
Scn1a	3.06745e-35	-2.75657	0.076	0.311	8.34529e-31
Etv1	3.51677e-35	-2.43924	0.079	0.32	9.56771e-31
Slc6a17	3.58603e-35	-2.88384	0.033	0.259	9.75614e-31
Tram2	3.62659e-35	2.0605	0.193	0.066	9.86651e-31
Gfra2	3.6341e-35	-2.60606	0.066	0.3	9.88694e-31
Ivns1abp	3.66446e-35	-1.36832	0.135	0.402	9.96954e-31
Myh14	3.94815e-35	-2.90065	0.028	0.252	1.07413e-30
Gm43445	4.13609e-35	2.46382	0.132	0.035	1.12526e-30
Abca7	5.03153e-35	-1.89748	0.073	0.321	1.36888e-30
Parva	8.40534e-35	0.991562	0.604	0.427	2.28676e-30
Snph	8.65698e-35	-1.9459	0.061	0.302	2.35522e-30
Cacnb3	8.68421e-35	-1.92314	0.083	0.332	2.36263e-30
Dnm1	8.80324e-35	-1.27176	0.145	0.416	2.39501e-30
Txn1	8.97328e-35	-1.475	0.272	0.533	2.44127e-30
Ecm2	1.07447e-34	2.18839	0.17	0.054	2.9232e-30
Lingo2	1.08565e-34	-3.19696	0.19	0.421	2.95361e-30
Tspan18	1.24187e-34	-2.16914	0.168	0.413	3.37863e-30
Jph3	1.25951e-34	-2.34487	0.035	0.263	3.42663e-30
Reep2	1.26594e-34	-2.46947	0.041	0.272	3.44411e-30
Cttnbp2nl	1.30056e-34	-1.8993	0.097	0.345	3.5383e-30
Sema4d	1.31951e-34	-2.36349	0.041	0.273	3.58986e-30
Astn1	1.32146e-34	-2.6372	0.036	0.263	3.59515e-30
Megf10	1.32678e-34	-2.91553	0.056	0.282	3.60963e-30
Mkx	1.38477e-34	2.08231	0.325	0.163	3.76739e-30
Hlf	1.40334e-34	1.2894	0.236	0.089	3.81792e-30
Abr	1.52291e-34	-1.60478	0.201	0.463	4.14323e-30
Cttnbp2	1.55881e-34	-1.89906	0.119	0.364	4.2409e-30
Pdcd4	1.66916e-34	1.63358	0.419	0.252	4.54113e-30
Clec2d	1.80054e-34	1.52864	0.216	0.077	4.89854e-30
Map6	2.29171e-34	-1.43008	0.198	0.451	6.23481e-30
Cd24a	2.34185e-34	-1.84733	0.132	0.386	6.37125e-30
Plscr1	2.51308e-34	1.98495	0.145	0.042	6.83707e-30
Adgrg1	2.595e-34	-2.46259	0.033	0.258	7.05994e-30
Ppp1r3b	2.95347e-34	2.67251	0.114	0.028	8.03522e-30
Acss1	3.25862e-34	-3.61011	0.036	0.253	8.86541e-30
Iqgap2	3.27605e-34	-2.75506	0.063	0.292	8.91283e-30
Mirg	3.63183e-34	-3.24902	0.033	0.251	9.88077e-30
Fasn	4.33145e-34	-1.58397	0.092	0.345	1.17841e-29
Ackr1	4.79313e-34	-2.22981	0.041	0.27	1.30402e-29
Atp1a3	5.39144e-34	-1.90966	0.064	0.304	1.46679e-29
Calm3	5.65843e-34	-1.56499	0.226	0.482	1.53943e-29
Dnm3	6.04089e-34	-1.3341	0.444	0.615	1.64349e-29
Gsap	6.09701e-34	-2.90452	0.056	0.28	1.65875e-29
Trnp1	6.62211e-34	-1.50545	0.172	0.435	1.80161e-29
Mcf2l	6.82094e-34	-2.31483	0.046	0.276	1.8557e-29
Mblac2	7.76561e-34	-1.70158	0.109	0.358	2.11271e-29
Acer3	8.06219e-34	1.24308	0.551	0.392	2.1934e-29
Gatm	8.10393e-34	-2.97086	0.041	0.262	2.20476e-29
Pde1a	8.12493e-34	1.04297	0.411	0.214	2.21047e-29
Slc35f4	8.26537e-34	-4.20002	0.021	0.232	2.24868e-29
Tubb2a	8.68991e-34	-1.57015	0.213	0.466	2.36418e-29
Spock3	9.38694e-34	-2.79724	0.056	0.282	2.55381e-29
Pde4d	1.05417e-33	-1.41017	0.541	0.704	2.86798e-29
Lhfpl2	1.17484e-33	1.63124	0.381	0.21	3.19627e-29
Sp110	1.2058e-33	1.68818	0.16	0.049	3.28049e-29
Bmerb1	1.48108e-33	-1.81489	0.068	0.307	4.02943e-29
Msrb3	1.70188e-33	1.97643	0.327	0.168	4.63013e-29
Ptp4a2	1.73589e-33	0.992455	0.606	0.456	4.72266e-29
Endod1	1.8453e-33	-1.74195	0.125	0.376	5.02032e-29
Dscam	1.86699e-33	-2.74755	0.068	0.294	5.07934e-29
Amer2	1.87049e-33	-2.67419	0.025	0.241	5.08885e-29
Satb1	2.11708e-33	-2.42334	0.059	0.289	5.75973e-29
Actr3b	2.15562e-33	-2.78874	0.035	0.253	5.86458e-29
Stard9	2.27176e-33	-1.61789	0.132	0.385	6.18054e-29
Cxadr	2.2848e-33	1.73457	0.251	0.106	6.21601e-29
Gm26754	2.86326e-33	2.74293	0.147	0.044	7.78979e-29
Kcnq2	3.27904e-33	-2.99936	0.023	0.235	8.92096e-29
Gria2	3.38731e-33	-3.12469	0.03	0.244	9.21552e-29
Rgs17	4.34547e-33	-2.10873	0.033	0.251	1.18223e-28
Cerk	4.50178e-33	-1.65258	0.124	0.378	1.22475e-28
Tafa5	5.07103e-33	-2.17214	0.112	0.348	1.37962e-28
Lrp1b	5.55339e-33	-2.82498	0.2	0.428	1.51085e-28
Uhmk1	5.56471e-33	-1.67161	0.127	0.376	1.51393e-28
Prdm12	5.68931e-33	-2.28523	0.053	0.279	1.54783e-28
Myo18a	5.87028e-33	-1.13046	0.285	0.56	1.59707e-28
Kcnc3	6.88307e-33	-2.12626	0.056	0.286	1.87261e-28
Gfod1	7.11726e-33	-1.67318	0.097	0.34	1.93632e-28
Ddhd1	7.92165e-33	-1.23585	0.373	0.618	2.15517e-28
Shank2	8.08666e-33	-3.38585	0.048	0.261	2.20006e-28
Bex2	8.20713e-33	-1.72212	0.124	0.372	2.23283e-28
Ackr3	8.62045e-33	2.62485	0.16	0.051	2.34528e-28
Cpne6	8.68254e-33	-2.22493	0.059	0.287	2.36217e-28
Clip2	8.71334e-33	-1.45647	0.114	0.368	2.37055e-28
Itprid2	8.72815e-33	-1.85546	0.086	0.325	2.37458e-28
Cntnap5a	8.89188e-33	-2.37327	0.071	0.298	2.41912e-28
Ogfrl1	9.02682e-33	-1.66024	0.111	0.358	2.45584e-28
Fat3	9.47148e-33	-2.75657	0.092	0.319	2.57681e-28
Ano6	9.53814e-33	0.871702	0.67	0.516	2.59495e-28
Lgmn	1.08699e-32	-1.87049	0.094	0.335	2.95727e-28
Clint1	1.08938e-32	1.33349	0.502	0.347	2.96376e-28
Zfp385b	1.10935e-32	-2.45656	0.107	0.337	3.0181e-28
Snhg11	1.13712e-32	-2.00187	0.429	0.576	3.09365e-28
D630045J12Rik	1.15617e-32	1.62238	0.383	0.217	3.14547e-28
Lin7a	1.19963e-32	-2.90308	0.048	0.264	3.2637e-28
Insc	1.20095e-32	-3.07971	0.036	0.249	3.2673e-28
Ryr2	1.26137e-32	-2.94914	0.054	0.273	3.4317e-28
Shc4	1.2794e-32	-3.89772	0.025	0.231	3.48074e-28
Prdm5	1.39023e-32	1.35733	0.381	0.202	3.78226e-28
Pcdh10	1.74141e-32	-2.64211	0.046	0.265	4.73769e-28
Rnf112	1.82621e-32	-3.12518	0.03	0.241	4.96838e-28
Runx1t1	1.83863e-32	-1.71743	0.127	0.368	5.00217e-28
Gng3	1.88405e-32	-1.23839	0.157	0.42	5.12574e-28
Rit2	1.9859e-32	-2.78229	0.045	0.261	5.40285e-28
Ecm1	2.00813e-32	2.73727	0.117	0.03	5.46332e-28
Crebbp	2.03184e-32	0.684362	0.762	0.655	5.52782e-28
Gas2l3	2.15831e-32	-3.54718	0.031	0.24	5.8719e-28
Atp6v1a	2.19667e-32	-1.22692	0.328	0.571	5.97627e-28
Lhfpl3	2.20577e-32	-2.34758	0.175	0.402	6.00102e-28
Pde4dip	2.26708e-32	-1.5326	0.238	0.466	6.16783e-28
Pld5	2.26988e-32	-2.82063	0.066	0.284	6.17545e-28
Ret	2.44809e-32	-1.88472	0.109	0.349	6.66026e-28
Tvp23a	2.48128e-32	-2.58703	0.026	0.238	6.75056e-28
Hey2	2.61016e-32	-3.49619	0.026	0.232	7.1012e-28
Syt2	2.65395e-32	-2.37936	0.076	0.301	7.22033e-28
Mmp14	2.66325e-32	1.64103	0.279	0.124	7.24564e-28
Plekha5	2.66639e-32	-1.37727	0.363	0.563	7.25417e-28
Norad	2.70732e-32	-1.52108	0.248	0.493	7.36554e-28
Vstm5	2.84412e-32	-2.79883	0.021	0.229	7.73771e-28
Dlgap3	3.01717e-32	-3.57751	0.017	0.219	8.20851e-28
Wnk2	3.2013e-32	-2.96278	0.033	0.244	8.70945e-28
Kdelr3	3.37988e-32	2.38204	0.101	0.023	9.1953e-28
2610035D17Rik	3.87209e-32	-1.79865	0.236	0.478	1.05344e-27
Calca	4.10649e-32	-2.08893	0.277	0.512	1.11721e-27
Tes	4.1581e-32	2.53594	0.178	0.063	1.13125e-27
Cdh10	4.32684e-32	-3.21076	0.046	0.258	1.17716e-27
Lrrc8b	4.89263e-32	-2.50404	0.041	0.256	1.33109e-27
Tspyl4	5.62451e-32	-1.89077	0.111	0.349	1.5302e-27
Ptch1	5.69452e-32	-1.85906	0.152	0.401	1.54925e-27
Eml5	5.79801e-32	-2.42406	0.041	0.257	1.57741e-27
Ndfip2	6.31882e-32	-1.33484	0.165	0.423	1.7191e-27
Rab15	6.43133e-32	-2.57846	0.038	0.252	1.74971e-27
Sptbn2	6.43629e-32	-2.8916	0.018	0.222	1.75106e-27
Nyap1	6.48026e-32	-2.27333	0.041	0.258	1.76302e-27
Eda	6.67291e-32	1.48576	0.434	0.258	1.81543e-27
Agmo	6.75609e-32	1.07868	0.462	0.27	1.83806e-27
Tenm4	7.28046e-32	-1.87289	0.086	0.312	1.98072e-27
Agfg2	7.60542e-32	-1.65963	0.078	0.314	2.06913e-27
Scrn1	7.70161e-32	-1.81847	0.059	0.286	2.0953e-27
Tspan15	8.04686e-32	-2.77923	0.03	0.237	2.18923e-27
Myo16	8.18526e-32	-3.37227	0.04	0.247	2.22688e-27
Tubb4a	9.1332e-32	-1.65491	0.084	0.321	2.48478e-27
Ppp1r12a	9.30639e-32	0.754369	0.754	0.631	2.5319e-27
Csgalnact1	9.3972e-32	-1.25249	0.201	0.459	2.5566e-27
Igsf9b	9.539e-32	-2.33931	0.041	0.257	2.59518e-27
Serpini1	9.9987e-32	-2.66643	0.031	0.242	2.72025e-27
Lrp11	1.1717e-31	-1.88998	0.056	0.28	3.18772e-27
Baiap2l1	1.23641e-31	1.49538	0.309	0.15	3.36377e-27
Gapdh	1.251e-31	-1.84691	0.104	0.338	3.40348e-27
Pcyt1b	1.27227e-31	-1.67101	0.076	0.311	3.46133e-27
Ston1	1.33904e-31	1.44513	0.309	0.145	3.64299e-27
Ncald	1.56337e-31	-1.15152	0.173	0.429	4.25331e-27
Sc5d	1.61763e-31	-1.51966	0.089	0.327	4.40092e-27
Fam171b	1.75143e-31	-1.42987	0.119	0.366	4.76494e-27
Fam107b	1.78628e-31	-2.71933	0.03	0.238	4.85977e-27
Rock2	1.80359e-31	0.924482	0.677	0.544	4.90685e-27
Erbb3	1.8078e-31	-3.45851	0.028	0.229	4.9183e-27
Plxnc1	1.87733e-31	-1.82113	0.129	0.364	5.10747e-27
Myo1b	1.97248e-31	-2.77775	0.035	0.244	5.36632e-27
Fads6	2.03749e-31	-3.24869	0.031	0.235	5.54319e-27
D130079A08Rik	2.36783e-31	-3.58623	0.074	0.298	6.44192e-27
Trpc3	2.42864e-31	-3.69995	0.028	0.23	6.60735e-27
Tmem255a	2.46985e-31	-2.32088	0.036	0.248	6.71948e-27
Synj2	2.64101e-31	1.8922	0.315	0.163	7.18513e-27
A330102I10Rik	2.75416e-31	-3.53609	0.02	0.218	7.49297e-27
Mertk	3.14008e-31	-2.50216	0.099	0.315	8.54289e-27
Gm35501	3.57873e-31	-3.72629	0.012	0.206	9.7363e-27
Svip	3.96118e-31	-1.3901	0.053	0.274	1.07768e-26
Sez6l2	4.3792e-31	-2.2867	0.038	0.249	1.1914e-26
Ppp2r5b	4.4456e-31	-1.51163	0.106	0.348	1.20947e-26
Robo1	4.59243e-31	1.237	0.439	0.26	1.24942e-26
Fam172a	4.7787e-31	0.783483	0.726	0.583	1.30009e-26
Gypc	4.82267e-31	1.42427	0.163	0.053	1.31205e-26
Tubb4b	5.19414e-31	-1.5045	0.238	0.479	1.41312e-26
Notch1	5.61238e-31	-2.74719	0.058	0.266	1.5269e-26
Afap1l2	5.66132e-31	-2.24726	0.111	0.329	1.54022e-26
Trim67	5.87406e-31	-2.93182	0.023	0.224	1.5981e-26
Thbs3	6.02477e-31	2.83051	0.2	0.079	1.6391e-26
Lrp5	6.25784e-31	1.63468	0.241	0.101	1.70251e-26
Lin28b	6.79032e-31	-2.89397	0.025	0.227	1.84737e-26
Mfhas1	6.84921e-31	-1.40509	0.134	0.378	1.8634e-26
Zfhx3	6.96072e-31	0.574287	0.83	0.706	1.89373e-26
Cdc14a	7.13249e-31	1.32001	0.414	0.236	1.94046e-26
Idi1	7.25247e-31	-2.03782	0.061	0.282	1.97311e-26
Mmp24	7.70376e-31	-3.28833	0.012	0.204	2.09589e-26
Gnaz	8.19042e-31	-1.76165	0.058	0.278	2.22829e-26
Klhl5	8.30917e-31	-1.71304	0.106	0.337	2.26059e-26
Pgam1	8.41092e-31	-1.71847	0.119	0.356	2.28828e-26
Phactr3	8.81196e-31	-2.4754	0.026	0.23	2.39738e-26
Il17rc	9.19813e-31	2.32836	0.142	0.044	2.50244e-26
Dusp15	1.01835e-30	-3.67674	0.021	0.219	2.77052e-26
Adam22	1.02959e-30	-1.42426	0.203	0.438	2.80111e-26
Fstl1	1.02975e-30	0.437666	0.916	0.771	2.80153e-26
Parvb	1.03999e-30	-2.09014	0.05	0.265	2.82939e-26
Pik3cd	1.11546e-30	-2.53436	0.031	0.237	3.03473e-26
Tro	1.16626e-30	-1.86589	0.069	0.294	3.17293e-26
Ptprn	1.2438e-30	-2.14265	0.061	0.279	3.38389e-26
St8sia3	1.24708e-30	-3.2075	0.018	0.214	3.39279e-26
Chd7	1.34502e-30	-2.6304	0.053	0.261	3.65927e-26
Carmil3	1.34527e-30	-1.60193	0.053	0.271	3.65994e-26
Mamld1	1.48483e-30	-1.72668	0.069	0.291	4.03964e-26
Nrip3	1.61923e-30	-2.14714	0.053	0.267	4.40528e-26
Cfl1	1.7195e-30	-1.37441	0.261	0.502	4.67808e-26
Fam171a1	1.78899e-30	-1.45603	0.129	0.371	4.86713e-26
Atp8b1	1.84726e-30	1.72329	0.201	0.076	5.02565e-26
Armcx1	1.87993e-30	-1.96429	0.056	0.275	5.11453e-26
Pcdh17	1.9174e-30	-2.28944	0.063	0.276	5.21648e-26
Skp1	1.96172e-30	-1.4556	0.246	0.491	5.33706e-26
Mapk3	2.01674e-30	-1.2192	0.257	0.504	5.48675e-26
Strn3	2.04057e-30	0.763179	0.721	0.599	5.55156e-26
Rtn4rl1	2.04347e-30	-1.90831	0.059	0.277	5.55947e-26
Stac2	2.04519e-30	-2.79605	0.021	0.219	5.56413e-26
Mpp7	2.16554e-30	1.39842	0.426	0.262	5.89157e-26
Cpeb4	2.18063e-30	-1.27945	0.196	0.451	5.93261e-26
Sort1	2.25195e-30	-2.93762	0.035	0.236	6.12664e-26
Zfp804a	2.34193e-30	-3.03821	0.048	0.254	6.37144e-26
Tmem233	2.34306e-30	-2.12309	0.178	0.404	6.37454e-26
Ccdc141	2.49981e-30	-1.89665	0.107	0.332	6.80099e-26
Entpd3	2.96986e-30	-2.16951	0.043	0.253	8.07981e-26
Eno1	3.10246e-30	-1.36188	0.119	0.36	8.44055e-26
Esyt2	3.10584e-30	1.05187	0.597	0.462	8.44975e-26
Gjc3	3.16903e-30	-4.46618	0.013	0.201	8.62167e-26
Sipa1l1	3.37337e-30	0.734614	0.589	0.398	9.17758e-26
Erg	3.46445e-30	2.21708	0.135	0.041	9.42537e-26
Id3	3.82254e-30	1.15683	0.432	0.251	1.03996e-25
Ngfr	3.8779e-30	-2.21972	0.091	0.312	1.05502e-25
Myt1	3.93266e-30	-2.9818	0.013	0.204	1.06992e-25
Tubb2b	4.15792e-30	-1.88636	0.112	0.34	1.1312e-25
Adgra2	4.21376e-30	1.45114	0.281	0.128	1.1464e-25
Erich3	4.25899e-30	-4.0013	0.012	0.199	1.1587e-25
Ubb	4.28731e-30	-1.1197	0.558	0.735	1.1664e-25
Pfkm	4.4094e-30	-1.66573	0.056	0.274	1.19962e-25
B830012L14Rik	4.7005e-30	-2.84121	0.038	0.239	1.27882e-25
Dynll2	4.81827e-30	-1.30338	0.254	0.501	1.31086e-25
Scamp5	5.04677e-30	-1.75022	0.074	0.298	1.37302e-25
Dapk1	5.10789e-30	1.14987	0.601	0.446	1.38965e-25
Camta1	5.23786e-30	-0.984605	0.508	0.661	1.42501e-25
Nsd1	5.91769e-30	0.67269	0.764	0.646	1.60997e-25
Tmem63c	5.97649e-30	-2.71981	0.021	0.216	1.62596e-25
Rimkla	6.07037e-30	-2.84016	0.023	0.219	1.65151e-25
Hsp90ab1	6.10458e-30	-1.27979	0.771	0.83	1.66081e-25
Folh1	6.30516e-30	-3.86962	0.023	0.215	1.71538e-25
Lgr5	6.40217e-30	-3.30562	0.038	0.236	1.74177e-25
Tubb5	6.51668e-30	-1.28861	0.404	0.607	1.77293e-25
Plcxd3	6.55445e-30	-2.82567	0.059	0.266	1.7832e-25
Lrp8	6.65178e-30	-2.22536	0.023	0.221	1.80968e-25
Syngr3	6.73066e-30	-2.41088	0.03	0.23	1.83114e-25
Tmem150c	7.12517e-30	-2.30449	0.028	0.228	1.93847e-25
Plekha7	7.17192e-30	-3.45554	0.036	0.233	1.95119e-25
P3h3	7.43241e-30	2.22779	0.185	0.069	2.02206e-25
Ppef1	7.4565e-30	-2.41716	0.045	0.25	2.02862e-25
Serinc1	8.50277e-30	-1.28898	0.251	0.494	2.31326e-25
Sgsm1	8.61825e-30	-3.35231	0.012	0.199	2.34468e-25
Hmbox1	8.67522e-30	-1.18778	0.332	0.542	2.36018e-25
Alpl	9.37831e-30	2.02423	0.208	0.082	2.55146e-25
Ghitm	1.05125e-29	-1.40172	0.165	0.408	2.86004e-25
Clvs1	1.07317e-29	-3.39361	0.02	0.211	2.91965e-25
Epb41l5	1.09273e-29	1.78887	0.393	0.245	2.97289e-25
Map4k4	1.23335e-29	-0.995701	0.424	0.653	3.35544e-25
Pdlim7	1.30471e-29	1.65837	0.416	0.268	3.54959e-25
Tmem130	1.31009e-29	-3.16778	0.012	0.198	3.56422e-25
Fhit	1.40245e-29	0.962902	0.642	0.501	3.81549e-25
Rnf24	1.41941e-29	-1.7654	0.064	0.281	3.86164e-25
Atcay	1.63768e-29	-1.80107	0.045	0.254	4.45546e-25
9130410C08Rik	1.71607e-29	0.669307	0.167	0.055	4.66874e-25
Rab37	1.73426e-29	-3.76332	0.008	0.191	4.71821e-25
Dusp26	1.78406e-29	-2.38672	0.054	0.262	4.85372e-25
Gpr45	1.7923e-29	-2.79078	0.023	0.216	4.87614e-25
Tspan17	1.97618e-29	-1.48346	0.149	0.39	5.37639e-25
Calcb	2.03279e-29	-2.37886	0.035	0.235	5.53042e-25
Khdrbs2	2.12538e-29	-2.82216	0.053	0.254	5.78232e-25
Rab3a	2.1426e-29	-1.56017	0.114	0.345	5.82916e-25
Tcerg1l	2.18305e-29	-2.98982	0.017	0.204	5.9392e-25
Dner	2.18953e-29	-2.10255	0.068	0.28	5.95685e-25
Immp2l	2.3081e-29	-1.3305	0.165	0.411	6.27941e-25
Fam219a	2.43225e-29	-0.908118	0.33	0.578	6.61717e-25
Hs6st3	2.87261e-29	-2.98147	0.109	0.316	7.81522e-25
Sptbn4	2.96318e-29	-2.2983	0.036	0.237	8.06163e-25
Dmxl2	2.99975e-29	-1.21883	0.216	0.454	8.16113e-25
Rgmb	3.06609e-29	-1.16029	0.224	0.471	8.34161e-25
Arnt2	3.22671e-29	-1.89731	0.092	0.313	8.7786e-25
Slc27a1	3.24114e-29	-2.06513	0.079	0.292	8.81785e-25
Mctp1	3.26178e-29	-2.45966	0.069	0.279	8.874e-25
Klhl32	3.2871e-29	-2.32096	0.035	0.233	8.94289e-25
Pcsk1n	3.63568e-29	-1.27103	0.163	0.409	9.89122e-25
Kmt2e	3.86067e-29	0.577599	0.814	0.705	1.05033e-24
Fam118b	4.11455e-29	2.25315	0.285	0.147	1.11941e-24
Rab11fip4	4.39708e-29	-2.19979	0.028	0.224	1.19627e-24
Tbc1d30	4.40943e-29	-3.1788	0.017	0.203	1.19963e-24
St8sia1	4.4171e-29	-3.22216	0.018	0.205	1.20172e-24
Oprm1	4.6325e-29	-2.26533	0.059	0.264	1.26032e-24
Ldhb	5.04237e-29	-1.54556	0.129	0.359	1.37183e-24
Grip1	5.04948e-29	-2.05662	0.262	0.452	1.37376e-24
Hsbp1l1	5.35477e-29	-2.29692	0.035	0.233	1.45682e-24
Atp13a2	5.41318e-29	-1.54938	0.078	0.302	1.47271e-24
Lpin1	5.46289e-29	-1.41908	0.119	0.352	1.48623e-24
Arvcf	5.74401e-29	-2.44354	0.038	0.236	1.56272e-24
Nr1d2	5.75869e-29	1.18376	0.455	0.286	1.56671e-24
Ptprr	6.08172e-29	-2.72028	0.066	0.269	1.65459e-24
Plcd3	6.78251e-29	1.68372	0.201	0.079	1.84525e-24
Pfkfb3	7.50336e-29	-2.44938	0.043	0.243	2.04136e-24
Apba2	7.72063e-29	-2.84052	0.03	0.222	2.10047e-24
Zdhhc14	8.22531e-29	-1.53236	0.158	0.392	2.23778e-24
Gcnt2	8.94859e-29	-1.09596	0.317	0.544	2.43455e-24
Nsg2	9.2824e-29	-2.33723	0.038	0.236	2.52537e-24
Bean1	9.59579e-29	-1.47884	0.094	0.319	2.61063e-24
Pnma2	9.66039e-29	-2.53813	0.028	0.221	2.62821e-24
Ank2	1.01476e-28	0.314901	0.962	0.828	2.76075e-24
Coro1a	1.02955e-28	-1.92815	0.059	0.269	2.80098e-24
Pacrg	1.06014e-28	-1.82018	0.074	0.289	2.8842e-24
Rasgef1a	1.11537e-28	-1.67183	0.091	0.311	3.03447e-24
Filip1l	1.28299e-28	1.62703	0.32	0.173	3.49051e-24
Kansl1	1.32372e-28	0.597481	0.815	0.681	3.60132e-24
Asap3	1.40707e-28	1.76891	0.281	0.136	3.82807e-24
Gk	1.47541e-28	-2.02156	0.043	0.245	4.014e-24
Basp1	1.53046e-28	-1.73796	0.12	0.341	4.16376e-24
Epha5	1.55268e-28	-2.68828	0.045	0.241	4.22422e-24
Ttbk1	1.65634e-28	-2.18277	0.035	0.231	4.50623e-24
Klf5	1.74206e-28	1.46931	0.368	0.212	4.73946e-24
Adcy9	1.767e-28	1.02219	0.553	0.407	4.80731e-24
Usp20	1.77915e-28	-1.54569	0.096	0.321	4.84035e-24
Ebf3	1.85313e-28	-1.70821	0.101	0.319	5.04163e-24
Pcyt2	1.89298e-28	-1.23643	0.12	0.355	5.15005e-24
Lrrc8c	1.93941e-28	-1.42631	0.096	0.322	5.27635e-24
Fcgrt	2.05418e-28	1.6043	0.163	0.056	5.58859e-24
Fkbp1a	2.29997e-28	-1.0462	0.188	0.437	6.25731e-24
Comp	2.63022e-28	3.92533	0.116	0.033	7.15577e-24
Tgfb3	2.67292e-28	2.63629	0.185	0.073	7.27196e-24
Tmem132e	2.7603e-28	-1.88482	0.059	0.266	7.50966e-24
Ybx3	2.94595e-28	1.57068	0.365	0.21	8.01474e-24
Susd2	3.22545e-28	-1.9947	0.05	0.252	8.77516e-24
Prkcz	3.2892e-28	-1.55419	0.071	0.289	8.94861e-24
Grm8	3.72111e-28	-3.37131	0.045	0.237	1.01237e-23
Svep1	3.90595e-28	2.10135	0.149	0.049	1.06265e-23
Ptprn2	3.93447e-28	-2.57568	0.048	0.244	1.07041e-23
Tgfbi	4.01218e-28	0.771296	0.248	0.104	1.09155e-23
Ica1	4.20384e-28	-1.67314	0.068	0.279	1.1437e-23
Nrxn3	4.20901e-28	-1.07218	0.276	0.498	1.1451e-23
Ids	4.21659e-28	-1.70205	0.087	0.305	1.14716e-23
Khdrbs3	4.26071e-28	-2.12341	0.048	0.248	1.15917e-23
Tgfbr2	4.56742e-28	0.953123	0.427	0.242	1.24261e-23
Ubn2	4.65982e-28	0.7397	0.721	0.603	1.26775e-23
Mllt11	5.31428e-28	-1.3816	0.096	0.322	1.4458e-23
Pnisr	5.59887e-28	0.66164	0.84	0.738	1.52323e-23
Ksr1	5.63783e-28	-1.23442	0.155	0.391	1.53383e-23
Serinc5	6.26247e-28	-1.60456	0.107	0.332	1.70377e-23
Rere	6.66241e-28	0.494494	0.84	0.734	1.81258e-23
Tcp11l1	6.81929e-28	-1.04738	0.261	0.494	1.85526e-23
Ccnl2	7.25734e-28	1.08673	0.533	0.386	1.97443e-23
Cyp2j6	8.08267e-28	-2.70355	0.041	0.232	2.19897e-23
Ror2	8.18264e-28	-2.19651	0.074	0.277	2.22617e-23
Pak3	8.78078e-28	-1.74736	0.073	0.279	2.3889e-23
Sltm	8.85789e-28	0.725385	0.724	0.617	2.40988e-23
Mllt10	9.07504e-28	0.69003	0.743	0.609	2.46895e-23
Gm12185	1.03272e-27	1.48939	0.177	0.064	2.80962e-23
Rnf180	1.06551e-27	-2.21064	0.046	0.242	2.89882e-23
Ece2	1.12718e-27	-1.94463	0.051	0.252	3.0666e-23
Cacna2d1	1.17336e-27	-1.51865	0.33	0.52	3.19224e-23
Erbin	1.19418e-27	1.13436	0.469	0.305	3.24889e-23
Ctsb	1.25248e-27	-1.1605	0.335	0.559	3.40751e-23
Cda	1.30297e-27	-1.79358	0.046	0.246	3.54486e-23
Slc44a2	1.31087e-27	-1.14339	0.167	0.411	3.56636e-23
Ppia	1.34454e-27	-1.15156	0.31	0.545	3.65795e-23
Atp6v1b2	1.35697e-27	-1.14005	0.203	0.45	3.69176e-23
Calhm2	1.37597e-27	2.0762	0.15	0.051	3.74345e-23
Tmem151a	1.47777e-27	-1.97284	0.046	0.244	4.02043e-23
Gm10419	1.50145e-27	-3.42482	0.012	0.187	4.08485e-23
Pmm1	1.74327e-27	-1.10979	0.142	0.378	4.74275e-23
Arl6ip1	1.93849e-27	-1.30651	0.206	0.44	5.27386e-23
Cadm4	1.98519e-27	-3.09486	0.033	0.218	5.40092e-23
Ptprm	2.05476e-27	0.776811	0.606	0.438	5.59019e-23
Crppa	2.13529e-27	-1.29451	0.177	0.415	5.80928e-23
Nol4	2.13737e-27	-2.72681	0.036	0.223	5.81493e-23
Gpm6a	2.25316e-27	-3.67622	0.023	0.202	6.12994e-23
Samd14	2.78036e-27	-2.02706	0.064	0.266	7.56424e-23
Rnd3	2.85791e-27	1.61755	0.243	0.109	7.77524e-23
Ntm	2.86444e-27	-3.18154	0.058	0.25	7.793e-23
Rusc1	3.44419e-27	-1.43814	0.078	0.291	9.37027e-23
Susd4	3.44834e-27	-1.78427	0.078	0.285	9.38155e-23
4930588A03Rik	3.73427e-27	-3.36735	0.021	0.2	1.01594e-22
Gm10863	4.24863e-27	-3.80023	0.03	0.207	1.15588e-22
Cyp1b1	4.32819e-27	2.21757	0.155	0.055	1.17753e-22
Csdc2	4.3424e-27	-2.12831	0.035	0.223	1.18139e-22
Prelid1	4.40021e-27	-1.58381	0.079	0.29	1.19712e-22
Srxn1	4.47821e-27	-1.70556	0.058	0.259	1.21834e-22
Hoxc4	4.82174e-27	1.79678	0.355	0.213	1.3118e-22
Ppfia2	4.84195e-27	-1.35831	0.155	0.37	1.3173e-22
Col5a1	4.92916e-27	1.59186	0.221	0.093	1.34103e-22
Pak1	5.24983e-27	-1.60117	0.069	0.276	1.42827e-22
Cdk5r2	5.40152e-27	-2.1446	0.04	0.23	1.46954e-22
Tnrc6c	5.5096e-27	0.779564	0.686	0.561	1.49894e-22
Prkcq	5.83701e-27	-2.99402	0.031	0.213	1.58802e-22
Tpd52	6.0612e-27	-1.20456	0.186	0.421	1.64901e-22
Nars	6.21311e-27	-1.14856	0.264	0.502	1.69034e-22
Ralgps2	6.38176e-27	-1.79192	0.101	0.313	1.73622e-22
Dgkg	6.43956e-27	-2.59482	0.059	0.251	1.75195e-22
Brinp2	6.65848e-27	-2.69615	0.035	0.219	1.81151e-22
Snx10	7.80171e-27	-1.12195	0.223	0.461	2.12253e-22
Ppp2r1a	8.25647e-27	-1.40487	0.155	0.384	2.24626e-22
Eno2	8.61983e-27	-1.31812	0.165	0.395	2.34511e-22
Arhgef26	8.66901e-27	-3.42429	0.03	0.207	2.35849e-22
Mapk11	8.7015e-27	-2.22826	0.033	0.22	2.36733e-22
Pcx	8.98924e-27	-2.0232	0.063	0.26	2.44561e-22
Syt14	9.1559e-27	-2.27364	0.026	0.208	2.49095e-22
Pcp4	1.06095e-26	-1.74494	0.145	0.362	2.88641e-22
Srrm4	1.12831e-26	-2.34814	0.023	0.202	3.06967e-22
Enah	1.15839e-26	-1.40716	0.233	0.453	3.15151e-22
Hs3st5	1.1924e-26	-2.0233	0.112	0.315	3.24405e-22
Kazn	1.24013e-26	-1.50333	0.14	0.359	3.37389e-22
Arhgef4	1.3557e-26	-2.59814	0.035	0.218	3.68832e-22
Mapre3	1.38885e-26	-1.05863	0.185	0.43	3.77852e-22
Rassf4	1.41514e-26	-3.37458	0.03	0.208	3.85004e-22
Spats2l	1.52385e-26	1.52996	0.424	0.279	4.14578e-22
Gpc1	1.53694e-26	-1.58877	0.061	0.261	4.18141e-22
Pde8a	1.5885e-26	1.63221	0.302	0.16	4.32167e-22
9430041J12Rik	1.7817e-26	-4.23207	0.017	0.186	4.8473e-22
Yap1	1.80575e-26	1.21795	0.338	0.178	4.91272e-22
Tenm2	1.8444e-26	-2.5154	0.145	0.357	5.01787e-22
Cd44	1.86704e-26	-1.49331	0.18	0.391	5.07946e-22
Exoc6	1.92391e-26	-1.61607	0.084	0.293	5.23419e-22
5031439G07Rik	1.92477e-26	-1.36579	0.094	0.31	5.23654e-22
Adgrl2	1.93522e-26	1.29175	0.404	0.246	5.26497e-22
Lss	1.96575e-26	-1.86487	0.046	0.239	5.34802e-22
Nrxn2	1.96992e-26	-1.25138	0.195	0.425	5.35937e-22
Stac	2.10207e-26	-3.4298	0.033	0.212	5.71888e-22
Cyp51	2.12174e-26	-1.41421	0.079	0.288	5.7724e-22
Cmtm5	2.18795e-26	-3.57384	0.021	0.193	5.95254e-22
Cxxc4	2.21811e-26	-2.46735	0.021	0.197	6.0346e-22
Fth1	2.50042e-26	-0.767858	0.521	0.742	6.80265e-22
Pik3r1	2.50266e-26	-0.800855	0.403	0.645	6.80875e-22
AI593442	2.55362e-26	-2.513	0.026	0.205	6.94737e-22
Capn5	2.65307e-26	-1.85353	0.071	0.271	7.21794e-22
Slc7a7	2.67737e-26	-1.73173	0.058	0.253	7.28406e-22
Slit1	2.92847e-26	-2.35647	0.031	0.213	7.9672e-22
Slc38a6	3.03332e-26	1.36996	0.444	0.303	8.25246e-22
Tuba4a	3.17398e-26	-1.77377	0.066	0.264	8.63512e-22
Cyp4v3	3.20264e-26	2.24137	0.191	0.079	8.7131e-22
Trpm7	3.2724e-26	0.946665	0.604	0.477	8.9029e-22
Fgf1	3.61425e-26	-1.03419	0.231	0.473	9.83293e-22
Iqsec3	3.64727e-26	-4.37625	0.007	0.17	9.92277e-22
Plekhd1	3.82569e-26	-2.67121	0.017	0.187	1.04082e-21
Crip2	3.82719e-26	-1.04213	0.19	0.425	1.04123e-21
Nrg2	3.83035e-26	-1.5618	0.066	0.266	1.04209e-21
Plxna2	3.97723e-26	1.04756	0.535	0.38	1.08205e-21
Camk2b	4.31962e-26	-2.35938	0.025	0.202	1.17519e-21
Kank1	5.14412e-26	-1.67249	0.211	0.424	1.39951e-21
Arhgef2	5.17549e-26	1.33533	0.254	0.116	1.40805e-21
Atp6v0e2	5.36825e-26	-1.57607	0.089	0.297	1.46049e-21
Fsd1l	5.91998e-26	-1.16671	0.153	0.379	1.61059e-21
Nuak1	6.0183e-26	-1.39092	0.104	0.319	1.63734e-21
Gm26691	6.29755e-26	-2.09681	0.031	0.211	1.71331e-21
Gm40841	6.3005e-26	-3.41848	0.013	0.18	1.71411e-21
Usp35	6.34877e-26	-1.52072	0.054	0.25	1.72725e-21
Shisal1	6.57581e-26	-2.09345	0.026	0.203	1.78901e-21
Prex1	7.65125e-26	-2.74427	0.041	0.222	2.0816e-21
Pdzrn3	8.78342e-26	1.23603	0.389	0.236	2.38962e-21
Slc16a7	8.87073e-26	-1.94657	0.076	0.273	2.41337e-21
Arhgap32	9.28885e-26	-0.99106	0.284	0.526	2.52712e-21
Paqr9	9.31971e-26	-2.52589	0.025	0.199	2.53552e-21
Chst8	1.00733e-25	-3.15308	0.012	0.177	2.74053e-21
Rdx	1.03081e-25	1.01473	0.587	0.476	2.80442e-21
Slc1a4	1.1017e-25	-1.7562	0.046	0.234	2.99729e-21
Sytl2	1.11551e-25	-1.32825	0.051	0.243	3.03485e-21
Chka	1.18797e-25	-0.951808	0.233	0.463	3.232e-21
Ctsl	1.33944e-25	-1.25291	0.249	0.472	3.64408e-21
Fmo2	1.35714e-25	2.31615	0.14	0.047	3.69223e-21
Gnai1	1.36047e-25	-1.5364	0.081	0.284	3.70129e-21
Scn4b	1.46119e-25	-2.21589	0.05	0.234	3.97532e-21
Fabp7	1.47333e-25	-2.30421	0.069	0.259	4.00833e-21
Abhd12	1.58579e-25	-1.17745	0.175	0.407	4.31429e-21
Mt3	1.6054e-25	-1.23734	0.129	0.349	4.36766e-21
6430548M08Rik	1.63887e-25	-1.79218	0.078	0.276	4.45871e-21
Gpr137c	1.67192e-25	-1.66676	0.066	0.262	4.54862e-21
Mdh1	1.70036e-25	-1.25946	0.158	0.382	4.626e-21
Fli1	1.70513e-25	0.390874	0.32	0.158	4.63898e-21
Trpv2	1.77559e-25	-1.82212	0.046	0.234	4.83068e-21
Dhcr7	1.8312e-25	-2.12157	0.041	0.224	4.98195e-21
Wdr17	1.99401e-25	-1.87238	0.041	0.225	5.42491e-21
Gucy1a2	2.06554e-25	-1.37655	0.149	0.366	5.61952e-21
Slc25a4	2.21227e-25	-1.05674	0.347	0.564	6.01871e-21
Tmem63b	2.29823e-25	-0.940582	0.195	0.434	6.25256e-21
Ehd4	2.30396e-25	-2.02255	0.064	0.255	6.26817e-21
Pgbd5	2.54726e-25	-2.12517	0.028	0.204	6.93008e-21
Sdk2	2.55948e-25	-2.14053	0.048	0.231	6.96333e-21
Sema4f	2.63864e-25	-2.35677	0.018	0.186	7.17867e-21
Macf1	2.6792e-25	0.475897	0.835	0.706	7.28904e-21
Tlx2	2.71167e-25	-2.76108	0.02	0.188	7.37737e-21
Tlcd3b	2.87398e-25	-1.56756	0.066	0.261	7.81894e-21
Zwint	2.98733e-25	-1.04731	0.279	0.501	8.12732e-21
Thy1	3.00048e-25	-1.50873	0.145	0.359	8.1631e-21
4732471J01Rik	3.29524e-25	-1.28782	0.163	0.381	8.96504e-21
Pde7a	3.37639e-25	1.38806	0.442	0.304	9.18579e-21
Scg2	3.44625e-25	-1.93345	0.106	0.306	9.37586e-21
Cachd1	3.73665e-25	1.11369	0.5	0.359	1.01659e-20
Smc4	3.99122e-25	1.42006	0.416	0.278	1.08585e-20
Per2	4.12331e-25	1.60106	0.309	0.168	1.12179e-20
Vstm2l	4.30068e-25	-1.9011	0.053	0.24	1.17004e-20
Tfrc	4.3644e-25	-1.91737	0.036	0.216	1.18738e-20
Sh3tc2	4.45991e-25	-3.9084	0.021	0.185	1.21336e-20
Gm36264	4.55485e-25	-0.978415	0.368	0.588	1.23919e-20
Slitrk3	4.57902e-25	-2.4658	0.025	0.196	1.24577e-20
Chd9	4.71524e-25	0.522197	0.87	0.792	1.28283e-20
Plcd4	4.75628e-25	-2.54249	0.021	0.19	1.29399e-20
Nxpe3	4.84461e-25	-2.01371	0.038	0.217	1.31803e-20
Trappc3l	4.87832e-25	-2.5453	0.094	0.287	1.32719e-20
Tafa2	5.03892e-25	-3.6343	0.043	0.218	1.37089e-20
Map1lc3a	5.21142e-25	-1.28509	0.144	0.361	1.41782e-20
Sptb	5.32512e-25	-2.73779	0.028	0.199	1.44875e-20
Gm43376	5.63388e-25	-3.4749	0.012	0.173	1.53275e-20
Jakmip3	5.65141e-25	-1.88225	0.033	0.21	1.53752e-20
Tnk2	5.74215e-25	-1.21534	0.109	0.324	1.56221e-20
Lrrc3b	6.13807e-25	-3.83131	0.007	0.164	1.66992e-20
Slc45a1	6.33953e-25	-2.02752	0.018	0.185	1.72473e-20
Azin2	6.3671e-25	-1.34076	0.086	0.288	1.73223e-20
Hmgcll1	6.74275e-25	-1.536	0.087	0.284	1.83443e-20
Rab30	6.89758e-25	1.29027	0.437	0.298	1.87656e-20
Acin1	7.39412e-25	0.783804	0.691	0.594	2.01164e-20
Rtn2	7.56062e-25	-2.42112	0.017	0.181	2.05694e-20
Mtmr6	8.28136e-25	-1.13902	0.205	0.433	2.25303e-20
Pear1	8.37076e-25	1.45599	0.219	0.098	2.27735e-20
Man2a1	9.28904e-25	1.75015	0.343	0.203	2.52718e-20
Lrrc75b	9.40808e-25	-1.99002	0.036	0.213	2.55956e-20
Cacna1d	9.42851e-25	-1.78359	0.058	0.244	2.56512e-20
Nwd1	9.54031e-25	-2.96141	0.018	0.181	2.59554e-20
Sox11	1.01471e-24	-4.38242	0.003	0.156	2.76061e-20
Ppfia4	1.01483e-24	-2.53982	0.026	0.196	2.76094e-20
Fam117b	1.019e-24	-1.3205	0.122	0.334	2.77229e-20
Txnip	1.06656e-24	1.36455	0.213	0.091	2.90168e-20
Mctp2	1.08178e-24	-2.83432	0.04	0.214	2.9431e-20
Cdh18	1.11874e-24	-2.16259	0.106	0.303	3.04364e-20
Ezr	1.20733e-24	1.53516	0.307	0.167	3.28466e-20
Rcan2	1.24043e-24	-1.19708	0.195	0.407	3.37471e-20
Atp5b	1.24925e-24	-0.993299	0.343	0.568	3.39871e-20
Slc12a2	1.29648e-24	1.00221	0.624	0.524	3.52721e-20
Sdcbp	1.30609e-24	-1.22149	0.191	0.416	3.55336e-20
B4galt1	1.38503e-24	1.42407	0.386	0.25	3.7681e-20
Eno1b	1.43609e-24	-1.35028	0.074	0.272	3.90701e-20
Chga	1.50124e-24	-2.2104	0.026	0.196	4.08428e-20
Gpm6b	1.5303e-24	-1.12096	0.553	0.713	4.16332e-20
Trim46	1.57463e-24	-1.85517	0.041	0.22	4.28393e-20
Lhcgr	1.63656e-24	-3.92745	0.017	0.176	4.45242e-20
Arpp21	1.64331e-24	-2.68958	0.035	0.205	4.47079e-20
Rin2	1.69092e-24	1.24623	0.447	0.305	4.60032e-20
Rasgrp1	1.71553e-24	-2.75652	0.031	0.201	4.66728e-20
Gm16083	1.72636e-24	-1.59088	0.116	0.317	4.69673e-20
Prima1	1.72965e-24	-3.37208	0.018	0.179	4.70567e-20
Ccser2	1.7533e-24	-0.747222	0.523	0.664	4.77002e-20
Cdh5	1.75952e-24	1.59403	0.149	0.053	4.78694e-20
Nova2	1.77213e-24	-1.68215	0.026	0.197	4.82127e-20
Mtmr4	1.81959e-24	-1.82053	0.038	0.215	4.95037e-20
Fgfr1	1.92921e-24	0.566859	0.706	0.554	5.24861e-20
Gm20400	1.96622e-24	2.53003	0.14	0.05	5.34931e-20
Herc3	2.0114e-24	-1.0559	0.117	0.331	5.47222e-20
Cfap100	2.01949e-24	-4.44721	0.017	0.174	5.49423e-20
Hk1	2.11801e-24	-1.05458	0.2	0.429	5.76226e-20
Pcdh1	2.15273e-24	-2.25738	0.028	0.197	5.85671e-20
Samd9l	2.20124e-24	1.54291	0.21	0.091	5.98868e-20
Syt6	2.48272e-24	-2.34327	0.026	0.193	6.7545e-20
Itpr3	2.66674e-24	-1.88823	0.092	0.281	7.25514e-20
Trim47	2.66704e-24	2.26225	0.122	0.039	7.25595e-20
Tmem38a	2.82322e-24	-1.46965	0.068	0.261	7.68084e-20
Rtkn	2.93845e-24	-1.593	0.081	0.275	7.99433e-20
Tox3	2.98949e-24	-2.92095	0.026	0.191	8.1332e-20
Mxra8	3.33553e-24	1.83692	0.117	0.036	9.07465e-20
Phf21a	3.36023e-24	0.648979	0.723	0.608	9.14184e-20
Ppm1j	3.48005e-24	-2.14997	0.041	0.216	9.46782e-20
Magee1	3.49807e-24	-1.80917	0.05	0.23	9.51684e-20
Tmem229a	3.83249e-24	-4.05077	0.01	0.164	1.04267e-19
Nsd3	3.84049e-24	0.725343	0.65	0.532	1.04484e-19
Pgf	3.97389e-24	1.99378	0.145	0.052	1.08114e-19
Cplx2	4.18157e-24	-3.02668	0.03	0.196	1.13764e-19
Jhy	4.23687e-24	-2.69298	0.013	0.17	1.15268e-19
Ppm1m	4.48755e-24	1.99894	0.127	0.042	1.22088e-19
Usp34	4.52426e-24	0.554394	0.792	0.693	1.23087e-19
Gm20186	4.64325e-24	2.28497	0.158	0.061	1.26324e-19
Arl8a	4.74499e-24	-0.922487	0.21	0.441	1.29092e-19
Nckap5	4.95212e-24	-2.02086	0.111	0.301	1.34727e-19
Etv5	5.41643e-24	-2.03259	0.045	0.221	1.47359e-19
Lingo1	5.48254e-24	-2.07515	0.031	0.2	1.49158e-19
Smurf2	5.49079e-24	1.30128	0.5	0.377	1.49382e-19
Dact1	5.51848e-24	2.65104	0.117	0.038	1.50136e-19
Kcnc2	5.9481e-24	-3.11812	0.033	0.197	1.61824e-19
Fbxl17	6.04691e-24	0.586299	0.776	0.64	1.64512e-19
Rbpms	6.14229e-24	1.16222	0.277	0.138	1.67107e-19
Lrig3	6.557e-24	1.64682	0.173	0.068	1.7839e-19
Rnf150	6.64842e-24	-1.66753	0.087	0.279	1.80877e-19
Adora1	7.06456e-24	-2.60809	0.025	0.188	1.92198e-19
AI413582	7.34994e-24	-1.87701	0.061	0.244	1.99963e-19
Fbxw7	7.80634e-24	-0.968513	0.243	0.468	2.12379e-19
Cep126	7.92364e-24	-1.46544	0.046	0.225	2.1557e-19
Zmym5	7.99045e-24	1.2853	0.467	0.338	2.17388e-19
Gdap1l1	8.0261e-24	-3.91269	0.005	0.154	2.18358e-19
Mtss1	8.2615e-24	-0.970549	0.221	0.45	2.24762e-19
Sel1l3	8.99475e-24	-2.45211	0.021	0.183	2.44711e-19
Tut4	9.43839e-24	0.849654	0.556	0.417	2.56781e-19
Wnk4	9.74925e-24	1.98498	0.135	0.047	2.65238e-19
Gramd4	9.87242e-24	-1.15605	0.107	0.314	2.68589e-19
Tspan2	1.05624e-23	-1.8935	0.046	0.223	2.87359e-19
Fut8	1.0774e-23	0.401748	0.606	0.451	2.93118e-19
Kcnmb4	1.08326e-23	-3.18948	0.023	0.183	2.94713e-19
Rragd	1.08795e-23	-2.32887	0.023	0.185	2.95986e-19
Marchf4	1.10189e-23	-4.09312	0.008	0.159	2.9978e-19
Gnb4	1.10309e-23	-1.50937	0.079	0.267	3.00108e-19
Cpeb1	1.15717e-23	-0.730902	0.368	0.579	3.14819e-19
Dach1	1.20749e-23	-3.02374	0.038	0.205	3.2851e-19
Celf6	1.21238e-23	-2.5384	0.018	0.177	3.29839e-19
Unc13c	1.24343e-23	-2.09144	0.097	0.284	3.38286e-19
Kcnn2	1.25295e-23	-2.55116	0.043	0.214	3.40878e-19
Lrrtm3	1.2588e-23	-2.88919	0.028	0.19	3.4247e-19
Mcam	1.26498e-23	-2.597	0.035	0.201	3.44149e-19
Dbi	1.31614e-23	-1.08808	0.182	0.402	3.5807e-19
Polr3g	1.38276e-23	-1.94836	0.043	0.216	3.76195e-19
Syt9	1.42016e-23	-1.82241	0.078	0.26	3.86367e-19
Fbxo2	1.4343e-23	-1.65471	0.076	0.262	3.90216e-19
Slc9a7	1.44706e-23	-2.44588	0.03	0.195	3.93687e-19
Lrrn3	1.44891e-23	-2.42696	0.026	0.19	3.94191e-19
Rbm25	1.51581e-23	0.54055	0.842	0.771	4.12392e-19
Klf7	1.51662e-23	-0.644679	0.728	0.81	4.12611e-19
Abca6	1.63505e-23	-1.98908	0.056	0.235	4.44832e-19
Rimbp2	1.78708e-23	-2.80706	0.02	0.178	4.86193e-19
Pwwp2b	1.81698e-23	2.53396	0.147	0.055	4.94329e-19
Ass1	1.87183e-23	-2.19901	0.028	0.192	5.0925e-19
Vwa5b2	1.88056e-23	-2.31739	0.018	0.176	5.11624e-19
Tef	1.97261e-23	0.994779	0.538	0.419	5.36668e-19
Stip1	2.0063e-23	-1.21683	0.13	0.341	5.45833e-19
Ccnyl1	2.02185e-23	1.95855	0.243	0.122	5.50065e-19
Cys1	2.03716e-23	2.08193	0.152	0.057	5.54229e-19
Panx2	2.06077e-23	-3.09833	0.013	0.167	5.60653e-19
Cat	2.10654e-23	-1.38935	0.099	0.298	5.73106e-19
Acsl4	2.10929e-23	-1.118	0.12	0.328	5.73854e-19
Kmt2c	2.17631e-23	0.638728	0.724	0.617	5.92086e-19
Fyn	2.17701e-23	-0.908243	0.215	0.45	5.92277e-19
Slc44a1	2.21185e-23	-0.903408	0.361	0.572	6.01755e-19
Col5a3	2.47649e-23	-1.12963	0.188	0.392	6.73754e-19
Uhrf1bp1l	2.48062e-23	-0.948171	0.219	0.442	6.74876e-19
Svop	2.57188e-23	-1.59002	0.045	0.22	6.99705e-19
Fhdc1	2.59366e-23	-2.95548	0.021	0.178	7.05631e-19
Nudt3	2.62303e-23	-1.02468	0.16	0.379	7.13622e-19
C130026I21Rik	2.68972e-23	2.25128	0.246	0.126	7.31764e-19
Hoxc5	2.70469e-23	2.25918	0.15	0.057	7.35838e-19
Tenm1	2.90283e-23	-1.57009	0.073	0.252	7.89745e-19
Hdac9	2.9036e-23	0.4454	0.596	0.407	7.89952e-19
Dcbld1	3.09176e-23	-1.9561	0.031	0.196	8.41144e-19
Itpk1	3.14204e-23	-1.24505	0.16	0.371	8.54824e-19
Hacd3	3.39432e-23	-1.00879	0.175	0.399	9.23459e-19
Eml1	3.42036e-23	-1.24481	0.299	0.486	9.30542e-19
Fbxl16	3.67706e-23	-2.24127	0.025	0.186	1.00038e-18
Asns	3.75646e-23	-2.31589	0.026	0.187	1.02198e-18
Sbk1	3.78559e-23	-1.95208	0.043	0.214	1.02991e-18
Pcdhac1	3.82996e-23	-3.75923	0.007	0.154	1.04198e-18
Drp2	4.19849e-23	-2.92959	0.041	0.207	1.14224e-18
Fabp5	4.32521e-23	-1.12949	0.097	0.294	1.17672e-18
Cox6c	4.44224e-23	-1.04674	0.257	0.479	1.20856e-18
Fam78b	4.64708e-23	-1.3692	0.084	0.275	1.26429e-18
Chchd2	4.79646e-23	-1.06356	0.241	0.46	1.30493e-18
Vldlr	4.89314e-23	-2.70827	0.043	0.207	1.33123e-18
Rgs10	5.2892e-23	-1.55277	0.073	0.256	1.43898e-18
Adamts12	5.4029e-23	0.845588	0.276	0.138	1.46991e-18
Psen2	5.53233e-23	-1.41737	0.071	0.258	1.50513e-18
Sh3pxd2b	5.61246e-23	-1.58925	0.201	0.396	1.52693e-18
Pcbp4	5.78749e-23	-0.86015	0.223	0.456	1.57454e-18
Large1	5.8053e-23	0.546802	0.749	0.609	1.57939e-18
Sdc2	6.12872e-23	1.25489	0.347	0.202	1.66738e-18
Ctnnbip1	6.20035e-23	-1.2753	0.083	0.273	1.68687e-18
Pnkd	6.38744e-23	-1.24961	0.139	0.342	1.73777e-18
Gabarapl2	6.4467e-23	-1.16625	0.111	0.313	1.75389e-18
Spon1	6.51121e-23	-2.47658	0.05	0.215	1.77144e-18
Cox5b	6.64926e-23	-0.989918	0.168	0.386	1.809e-18
Gm13889	6.8614e-23	-1.83011	0.046	0.218	1.86671e-18
Mmp15	7.48872e-23	-2.28877	0.038	0.203	2.03738e-18
Gm42722	7.61306e-23	-3.13664	0.01	0.158	2.07121e-18
Klhl3	7.65163e-23	-1.60746	0.043	0.214	2.0817e-18
Gabrg2	7.68232e-23	-1.54198	0.033	0.199	2.09005e-18
Trim37	7.89928e-23	-0.882418	0.173	0.398	2.14908e-18
Mob3b	8.21918e-23	1.13663	0.393	0.247	2.23611e-18
Gyg	8.49065e-23	-1.80749	0.045	0.214	2.30997e-18
2700054A10Rik	8.52809e-23	2.36322	0.208	0.098	2.32015e-18
Sorcs3	8.57086e-23	-2.92368	0.038	0.199	2.33179e-18
Paqr6	8.6116e-23	-3.49411	0.02	0.171	2.34287e-18
Kcnk13	9.0092e-23	-3.9579	0.01	0.156	2.45104e-18
Pebp1	9.27628e-23	-1.14252	0.135	0.34	2.52371e-18
Slitrk5	9.48012e-23	-3.21851	0.01	0.157	2.57916e-18
Mtus2	9.5451e-23	-1.78038	0.048	0.219	2.59684e-18
9530077C05Rik	9.73757e-23	-1.63586	0.051	0.225	2.6492e-18
Tprgl	1.0186e-22	-1.26908	0.112	0.309	2.77121e-18
Tex15	1.04497e-22	3.12095	0.104	0.032	2.84293e-18
Negr1	1.08781e-22	-1.06858	0.137	0.337	2.95951e-18
Usp24	1.10391e-22	1.04384	0.472	0.341	3.00329e-18
Gm12216	1.12916e-22	1.55962	0.304	0.171	3.072e-18
Tmem151b	1.18907e-22	-3.31214	0.013	0.162	3.23499e-18
Man2a2	1.19865e-22	-1.06508	0.101	0.299	3.26106e-18
Kcnj3	1.30208e-22	-2.53886	0.02	0.173	3.54243e-18
Serpinb9	1.30418e-22	2.42822	0.114	0.037	3.54815e-18
Flot1	1.30454e-22	-1.01847	0.165	0.38	3.54913e-18
S1pr3	1.34685e-22	-2.51801	0.045	0.208	3.66424e-18
Gabra3	1.50574e-22	2.63871	0.188	0.084	4.09651e-18
Nptxr	1.57485e-22	-1.98457	0.033	0.195	4.28455e-18
Rcan3	1.58995e-22	-1.83312	0.046	0.216	4.32561e-18
Actr1b	1.60757e-22	-1.06545	0.147	0.358	4.37355e-18
Por	1.71868e-22	1.06868	0.464	0.331	4.67585e-18
C77080	1.73948e-22	-1.09967	0.107	0.31	4.73244e-18
Sh3bp5l	1.79704e-22	-1.55628	0.064	0.244	4.88902e-18
Tmem50b	1.85339e-22	-1.11803	0.079	0.269	5.04234e-18
mt-Nd4	1.91385e-22	-0.903635	0.413	0.617	5.20682e-18
Jag2	2.00604e-22	-3.13139	0.01	0.155	5.45763e-18
Acat2	2.08247e-22	-1.16621	0.071	0.255	5.66556e-18
Rell2	2.13148e-22	-2.21002	0.021	0.175	5.7989e-18
Stxbp5l	2.13723e-22	-2.60726	0.04	0.201	5.81455e-18
0610040J01Rik	2.23231e-22	-2.82446	0.025	0.178	6.07324e-18
Cpne2	2.23664e-22	-1.29845	0.094	0.283	6.08501e-18
Klf9	2.24161e-22	0.969966	0.586	0.487	6.09852e-18
Cntnap4	2.32824e-22	-4.65072	0.008	0.151	6.33421e-18
Snx16	2.36592e-22	-1.33527	0.084	0.27	6.43672e-18
Tagln3	2.39251e-22	-1.63896	0.061	0.236	6.50906e-18
Impdh1	2.52288e-22	-1.32261	0.061	0.24	6.86374e-18
Cyp2j9	2.53425e-22	-3.1561	0.018	0.167	6.89467e-18
Pakap	2.58147e-22	-1.32378	0.107	0.293	7.02315e-18
Lrsam1	2.58719e-22	-1.10411	0.125	0.331	7.03872e-18
Ckap5	2.687e-22	-0.961486	0.333	0.529	7.31025e-18
Tmx2	2.80833e-22	-1.40663	0.089	0.278	7.64033e-18
Hsd17b7	2.84264e-22	-2.12345	0.036	0.198	7.73369e-18
Psmc5	2.98148e-22	-1.25921	0.091	0.281	8.11142e-18
Ap1ar	3.04661e-22	-1.09052	0.145	0.349	8.2886e-18
Zswim5	3.27315e-22	-1.5191	0.066	0.243	8.90492e-18
Ywhaz	3.27984e-22	-0.936914	0.483	0.643	8.92312e-18
Tspan3	3.2808e-22	-1.20586	0.14	0.343	8.92575e-18
Pbxip1	3.47909e-22	1.16601	0.259	0.127	9.46521e-18
Mrgpra2b	3.66029e-22	-2.2804	0.051	0.217	9.95819e-18
Mroh1	3.80814e-22	-1.3119	0.092	0.284	1.03604e-17
Plcb1	3.85399e-22	-1.40305	0.365	0.553	1.04852e-17
mt-Atp6	3.91911e-22	-0.884177	0.427	0.642	1.06623e-17
Atp2b3	3.94426e-22	-2.57448	0.017	0.165	1.07308e-17
Shisa4	4.03508e-22	-2.29418	0.035	0.194	1.09778e-17
Dynlt3	4.1546e-22	-1.11472	0.168	0.373	1.1303e-17
Tex2	4.17489e-22	-0.95548	0.211	0.431	1.13582e-17
Prkar1a	4.39384e-22	-1.07184	0.294	0.504	1.19539e-17
Serping1	4.45947e-22	1.69769	0.248	0.127	1.21324e-17
Hdac7	4.46333e-22	1.45751	0.348	0.217	1.21429e-17
Rhobtb2	4.4881e-22	-1.36059	0.054	0.227	1.22103e-17
Abca2	4.60052e-22	-1.17193	0.099	0.292	1.25162e-17
Faxc	4.63934e-22	-1.30326	0.045	0.214	1.26218e-17
Fstl5	4.81796e-22	-2.53517	0.03	0.184	1.31077e-17
Rasa3	5.00731e-22	-1.50813	0.153	0.342	1.36229e-17
Agtpbp1	5.01373e-22	-0.878615	0.333	0.525	1.36404e-17
Ntrk1	5.06972e-22	-2.26081	0.066	0.235	1.37927e-17
Dctn3	5.25492e-22	-1.28787	0.106	0.299	1.42965e-17
Pgk1	5.50447e-22	-0.994998	0.106	0.3	1.49755e-17
Cox4i1	5.55212e-22	-0.905619	0.224	0.447	1.51051e-17
Amigo1	5.61539e-22	-1.77342	0.035	0.195	1.52772e-17
Nipbl	5.64106e-22	0.580719	0.739	0.639	1.53471e-17
Usp31	5.69178e-22	-1.05655	0.119	0.318	1.54851e-17
Hepacam	5.98319e-22	-4.73562	0.007	0.145	1.62779e-17
Gm10125	6.11481e-22	-1.16773	0.102	0.294	1.66359e-17
Eps15	6.39592e-22	-0.848822	0.345	0.549	1.74007e-17
Slc9a3r1	6.51637e-22	-2.56791	0.021	0.172	1.77284e-17
Cgnl1	6.56603e-22	0.895879	0.381	0.23	1.78635e-17
Epb41l4a	6.73615e-22	-1.63026	0.068	0.24	1.83264e-17
Apbb1	6.83003e-22	-1.21481	0.101	0.294	1.85818e-17
Ugcg	6.98719e-22	-1.0885	0.102	0.295	1.90093e-17
mt-Co1	7.19726e-22	-1.03274	0.34	0.547	1.95809e-17
Adgrb1	7.37443e-22	-2.3568	0.021	0.172	2.00629e-17
Agap1	7.80888e-22	-0.834474	0.442	0.642	2.12448e-17
Fkbp9	7.94232e-22	1.40817	0.256	0.129	2.16079e-17
Sgip1	8.3417e-22	-1.24458	0.167	0.363	2.26944e-17
Pgap4	8.65967e-22	-1.72667	0.033	0.191	2.35595e-17
Dzank1	8.82123e-22	-1.18811	0.078	0.262	2.3999e-17
Tmem200a	8.96783e-22	-2.58787	0.02	0.168	2.43979e-17
Atp5a1	9.15883e-22	-0.931491	0.267	0.483	2.49175e-17
Kat6b	9.1646e-22	0.855026	0.566	0.45	2.49332e-17
Nagk	9.74468e-22	-0.814676	0.135	0.344	2.65114e-17
Diablo	1.00336e-21	-1.13432	0.101	0.295	2.72974e-17
Got2	1.0208e-21	-1.0884	0.172	0.378	2.7772e-17
Aldoc	1.02784e-21	-1.79499	0.038	0.199	2.79634e-17
Kctd8	1.06555e-21	-1.386	0.211	0.391	2.89893e-17
Itpr1	1.07686e-21	0.958358	0.427	0.288	2.92972e-17
6330411D24Rik	1.08145e-21	-3.26221	0.048	0.206	2.9422e-17
Gm43713	1.15069e-21	-1.16688	0.028	0.184	3.13056e-17
Stom	1.20122e-21	2.13411	0.158	0.064	3.26803e-17
Mest	1.22767e-21	-2.52328	0.02	0.167	3.34001e-17
Hagh	1.29776e-21	-1.35672	0.068	0.244	3.53067e-17
Cntnap5c	1.30465e-21	-2.11293	0.043	0.204	3.54944e-17
Madd	1.31399e-21	-1.0578	0.099	0.294	3.57483e-17
Bves	1.3331e-21	-3.45456	0.01	0.15	3.62684e-17
Ypel4	1.37132e-21	-2.40214	0.021	0.171	3.73082e-17
Phyhipl	1.40007e-21	-2.10652	0.033	0.189	3.80902e-17
Wasf3	1.40136e-21	-1.45548	0.05	0.218	3.81253e-17
Ppfia3	1.47073e-21	-1.77363	0.026	0.18	4.00126e-17
Angel1	1.4747e-21	-2.30446	0.02	0.168	4.01208e-17
Optn	1.54566e-21	-1.23409	0.071	0.25	4.20514e-17
Phf20l1	1.63532e-21	0.780543	0.616	0.489	4.44905e-17
Vwa5a	1.68605e-21	-1.03721	0.19	0.397	4.58708e-17
Got1	1.68979e-21	-1.78181	0.048	0.212	4.59723e-17
Septin5	1.75459e-21	-1.0075	0.147	0.354	4.77354e-17
Chn2	1.75723e-21	-2.82001	0.035	0.188	4.78073e-17
Fbxo41	1.77107e-21	-1.87653	0.023	0.174	4.81837e-17
Ankhd1	1.92445e-21	0.647062	0.708	0.608	5.23565e-17
Elovl4	1.99625e-21	-3.7817	0.008	0.146	5.431e-17
Gdpd1	2.07643e-21	-1.33575	0.054	0.224	5.64912e-17
Atp6v0c	2.13268e-21	-1.05498	0.228	0.432	5.80218e-17
Actl6b	2.14726e-21	-1.97717	0.02	0.168	5.84184e-17
Slc35f3	2.2997e-21	-2.15077	0.048	0.209	6.25656e-17
Fam13a	2.30755e-21	-1.56237	0.071	0.246	6.27792e-17
Celsr3	2.35624e-21	-2.40801	0.015	0.159	6.41039e-17
Insig1	2.63661e-21	-1.41852	0.081	0.26	7.17316e-17
Rassf5	2.83858e-21	-1.64219	0.053	0.219	7.72264e-17
P2rx7	2.89152e-21	-2.5146	0.048	0.203	7.86666e-17
Fam114a1	2.93634e-21	1.11008	0.371	0.226	7.98862e-17
Sars	2.9531e-21	-0.854334	0.173	0.388	8.0342e-17
Fbxo21	2.9985e-21	-1.41606	0.068	0.243	8.15772e-17
Ankrd13d	3.1331e-21	-1.28016	0.069	0.244	8.5239e-17
Scrt2	3.1626e-21	-2.71092	0.013	0.155	8.60417e-17
Slc48a1	3.32131e-21	-1.31966	0.076	0.253	9.03596e-17
Usp5	3.35585e-21	-0.939614	0.116	0.312	9.12992e-17
Tac1	3.41634e-21	-2.17086	0.066	0.233	9.2945e-17
Peli3	3.45752e-21	-2.84101	0.013	0.154	9.40652e-17
Opcml	3.48142e-21	-1.13561	0.221	0.423	9.47155e-17
Fus	3.60501e-21	0.561907	0.756	0.667	9.80778e-17
Phldb1	3.71422e-21	1.22445	0.404	0.266	1.01049e-16
Nktr	3.74492e-21	0.616829	0.752	0.654	1.01884e-16
Clstn1	3.79654e-21	-0.910638	0.307	0.521	1.03289e-16
Pten	3.86053e-21	-0.72412	0.452	0.625	1.0503e-16
Prkacb	4.05989e-21	-0.970207	0.213	0.426	1.10453e-16
Ndn	4.18932e-21	-2.1617	0.056	0.218	1.13975e-16
Popdc3	4.20089e-21	-2.48739	0.018	0.162	1.14289e-16
Trip10	4.33695e-21	1.92921	0.198	0.092	1.17991e-16
Psmc3	4.59906e-21	-0.927259	0.178	0.387	1.25122e-16
Prnp	4.6347e-21	-1.0483	0.223	0.429	1.26092e-16
Rab39b	4.66918e-21	-2.85102	0.015	0.155	1.2703e-16
Pea15a	4.77807e-21	-1.03235	0.175	0.381	1.29992e-16
Ptger3	5.05485e-21	-2.03412	0.043	0.2	1.37522e-16
Smyd3	5.10946e-21	0.730773	0.612	0.49	1.39008e-16
9930111J21Rik2	5.26591e-21	1.45262	0.129	0.046	1.43264e-16
Klc2	5.39247e-21	-1.01585	0.13	0.328	1.46707e-16
Synm	5.57384e-21	-1.35242	0.282	0.465	1.51642e-16
Eif1ax	5.9714e-21	-1.46266	0.083	0.259	1.62458e-16
Dnm1l	6.03958e-21	-0.76592	0.337	0.551	1.64313e-16
Kcnd1	6.08083e-21	-1.02965	0.071	0.248	1.65435e-16
Slc41a2	6.61744e-21	-1.18797	0.063	0.233	1.80034e-16
Atp5md	6.82795e-21	-1.00946	0.152	0.354	1.85761e-16
Fam13c	7.421e-21	-2.01553	0.028	0.178	2.01896e-16
Prkab2	7.49456e-21	-0.965806	0.132	0.33	2.03897e-16
mt-Co2	7.59438e-21	-1.11365	0.267	0.468	2.06613e-16
Fkbp1b	7.60453e-21	-1.57204	0.064	0.232	2.06889e-16
Sorl1	8.08291e-21	-1.26345	0.223	0.412	2.19904e-16
Celsr2	8.92924e-21	-1.77099	0.053	0.214	2.42929e-16
Peg13	9.03619e-21	-1.7293	0.046	0.205	2.45839e-16
Tlx3	9.13565e-21	-2.17283	0.025	0.171	2.48544e-16
Esyt1	9.46133e-21	-1.15908	0.125	0.316	2.57405e-16
Btbd8	9.48858e-21	-1.29617	0.063	0.233	2.58146e-16
Cntn3	9.58679e-21	-1.74439	0.073	0.24	2.60818e-16
Cacng7	9.63113e-21	-1.23651	0.038	0.195	2.62024e-16
Gm1604a	1.0161e-20	-1.07167	0.068	0.237	2.7644e-16
Nlgn3	1.05179e-20	-1.88008	0.041	0.197	2.8615e-16
Htr4	1.0647e-20	-4.56108	0.013	0.148	2.89661e-16
S100a6	1.12586e-20	-0.801861	0.513	0.69	3.06302e-16
Pcp4l1	1.13359e-20	-2.04517	0.056	0.217	3.08404e-16
Inf2	1.1979e-20	-1.43676	0.078	0.249	3.25902e-16
Abca5	1.21289e-20	-1.25699	0.122	0.309	3.29978e-16
Kcnc1	1.26828e-20	-2.60547	0.021	0.164	3.45049e-16
Tm6sf1	1.26892e-20	-2.47038	0.02	0.162	3.45223e-16
Tecr	1.27006e-20	-0.861109	0.33	0.545	3.45532e-16
Cdh8	1.27293e-20	-3.10653	0.023	0.166	3.46312e-16
Prxl2a	1.30311e-20	-1.72445	0.046	0.205	3.54524e-16
Ypel3	1.34856e-20	-0.931868	0.195	0.405	3.6689e-16
Armcx3	1.35927e-20	-1.03029	0.117	0.308	3.69802e-16
Hs3st4	1.37508e-20	2.64889	0.173	0.077	3.74104e-16
mt-Cytb	1.39244e-20	-0.944074	0.343	0.544	3.78828e-16
Fzd3	1.39647e-20	-1.21109	0.117	0.304	3.79924e-16
Scn3b	1.40034e-20	-2.18295	0.028	0.175	3.80977e-16
Frem2	1.42283e-20	-2.98848	0.028	0.172	3.87095e-16
Pank1	1.4345e-20	-1.61793	0.036	0.188	3.90271e-16
Trp53inp2	1.43978e-20	-1.46024	0.036	0.19	3.91708e-16
Elfn1	1.4617e-20	-3.14604	0.01	0.144	3.97669e-16
Prkaca	1.47986e-20	-0.987254	0.144	0.344	4.02611e-16
Kcnip1	1.48337e-20	-1.79724	0.244	0.425	4.03565e-16
Bach2it1	1.58269e-20	-3.89432	0.01	0.143	4.30586e-16
Insyn2b	1.65334e-20	-3.69771	0.012	0.146	4.49808e-16
Eif5a2	1.66403e-20	-1.85275	0.043	0.198	4.52717e-16
Rhou	1.69158e-20	-1.1387	0.045	0.205	4.6021e-16
Fbln5	1.82232e-20	-2.12133	0.096	0.257	4.9578e-16
Lgi4	1.88771e-20	-2.03915	0.109	0.274	5.13571e-16
Atp5g1	1.95326e-20	-1.07749	0.144	0.338	5.31403e-16
Arhgdig	2.00317e-20	-2.0694	0.028	0.175	5.44981e-16
Nid2	2.06195e-20	-2.42685	0.045	0.194	5.60974e-16
Fbln2	2.12585e-20	-1.69298	0.112	0.282	5.78358e-16
Klhl24	2.1284e-20	-0.93137	0.14	0.339	5.79052e-16
Srebf2	2.16247e-20	-0.780142	0.261	0.479	5.88322e-16
Mpnd	2.23979e-20	-1.27911	0.073	0.244	6.09357e-16
Chd5	2.26218e-20	-1.52447	0.043	0.198	6.15449e-16
Pkib	2.34314e-20	-2.38594	0.018	0.157	6.37476e-16
Cacng4	2.3707e-20	-3.77207	0.015	0.15	6.44972e-16
Renbp	2.44033e-20	1.87804	0.102	0.033	6.63915e-16
Tspan14	2.49533e-20	-1.09799	0.155	0.343	6.78878e-16
Tdrkh	2.54547e-20	-1.84884	0.03	0.178	6.92521e-16
Limk1	2.56037e-20	-0.844746	0.129	0.328	6.96575e-16
Fam102b	2.61917e-20	-1.15888	0.144	0.333	7.12571e-16
Mdh2	2.63562e-20	-0.958629	0.177	0.38	7.17048e-16
Ncs1	2.74029e-20	-0.847969	0.087	0.269	7.45524e-16
Rab3ip	2.76145e-20	-1.17408	0.056	0.22	7.51279e-16
Trim30d	2.80366e-20	1.83644	0.125	0.045	7.62763e-16
Adamts20	2.89491e-20	-2.6211	0.05	0.199	7.8759e-16
Gm10862	3.0057e-20	-3.5012	0.005	0.134	8.17732e-16
Ube2ql1	3.0526e-20	-1.90367	0.033	0.182	8.30491e-16
Tnfrsf11a	3.07228e-20	-2.61318	0.018	0.157	8.35844e-16
Hopx	3.31962e-20	-1.85942	0.045	0.198	9.03135e-16
Ankrd46	3.33535e-20	-1.18682	0.109	0.291	9.07415e-16
Brinp1	3.33671e-20	-3.35009	0.021	0.16	9.07787e-16
Sf3b1	3.43589e-20	0.669547	0.665	0.575	9.34767e-16
Dync1i1	3.6517e-20	-1.13196	0.262	0.438	9.93482e-16
Fchsd2	3.67952e-20	0.702668	0.561	0.429	1.00105e-15
Cdk15	3.83466e-20	-1.97011	0.046	0.2	1.04326e-15
Cisd3	3.88473e-20	-0.953969	0.109	0.298	1.05688e-15
Hint1	3.92598e-20	-1.02011	0.208	0.41	1.0681e-15
Pkd2	3.97943e-20	1.24487	0.408	0.285	1.08264e-15
Rab6a	4.02932e-20	-0.89075	0.437	0.606	1.09622e-15
Ccdc92b	4.04634e-20	-2.81017	0.012	0.145	1.10085e-15
Nme1	4.10099e-20	-1.35826	0.087	0.262	1.11571e-15
Rangap1	4.17334e-20	-1.13289	0.157	0.352	1.1354e-15
Pcdha12	4.21257e-20	-2.44623	0.01	0.142	1.14607e-15
Hdac11	4.28743e-20	-1.65092	0.023	0.166	1.16644e-15
Gars	4.36312e-20	-1.00428	0.165	0.363	1.18703e-15
Tox2	4.50862e-20	-2.40931	0.021	0.161	1.22661e-15
Shc2	4.55945e-20	-1.85755	0.026	0.171	1.24044e-15
Zfp521	4.74207e-20	0.567061	0.508	0.345	1.29013e-15
Kirrel3	5.02184e-20	-3.01221	0.109	0.275	1.36624e-15
Dnaaf9	5.06088e-20	-0.705559	0.485	0.643	1.37686e-15
Pink1	5.27584e-20	-1.2418	0.119	0.303	1.43535e-15
Tmem169	5.36199e-20	-1.46061	0.021	0.162	1.45878e-15
Fbxo44	5.59649e-20	-1.9358	0.026	0.17	1.52258e-15
Zfhx2	5.60279e-20	-1.12561	0.081	0.254	1.52429e-15
Zfp40	6.20956e-20	-1.07539	0.099	0.28	1.68937e-15
Btg1	6.21554e-20	-1.59263	0.058	0.217	1.691e-15
Sos2	6.25188e-20	0.964986	0.482	0.362	1.70089e-15
Coq10b	6.33007e-20	1.80428	0.282	0.166	1.72216e-15
Tecpr1	6.3469e-20	-0.846981	0.167	0.374	1.72674e-15
Golgb1	6.46569e-20	0.795133	0.624	0.525	1.75906e-15
Cacng2	6.48392e-20	-2.28145	0.021	0.161	1.76401e-15
Snx25	6.49875e-20	-0.937836	0.12	0.311	1.76805e-15
Reln	6.70561e-20	-2.49307	0.071	0.227	1.82433e-15
Col24a1	6.86555e-20	-2.62556	0.03	0.172	1.86784e-15
Slc25a13	6.88131e-20	-3.03675	0.026	0.165	1.87213e-15
Hspd1	6.91988e-20	-0.950113	0.16	0.357	1.88262e-15
Fbxo31	6.96563e-20	-1.05889	0.111	0.295	1.89507e-15
Gm12116	7.22511e-20	-2.83257	0.007	0.134	1.96566e-15
Kcnj10	7.22593e-20	-3.20784	0.023	0.16	1.96589e-15
Tmx4	7.84962e-20	-0.799963	0.158	0.365	2.13557e-15
Cab39l	8.12436e-20	-0.805039	0.281	0.492	2.21031e-15
Epha6	8.698e-20	-2.59449	0.086	0.246	2.36638e-15
Map1lc3b	8.90716e-20	-0.879	0.211	0.417	2.42328e-15
Map3k9	8.95343e-20	-3.01342	0.007	0.134	2.43587e-15
Vamp1	8.98071e-20	-1.20125	0.157	0.345	2.44329e-15
Cldnd1	8.99393e-20	-1.02499	0.048	0.205	2.44689e-15
[truncated: 6,830 more rows]

## Sheet: FindMarkers_FIB_EM
	p_val	avg_log2FC	pct.1	pct.2	p_val_adj
Ebf2	0	4.5782	0.921	0.121	0
Cped1	0	3.96995	0.942	0.215	0
Egfr	0	4.17243	0.787	0.091	0
Abi3bp	0	4.03971	0.835	0.14	0
Gpc3	0	4.47034	0.807	0.157	0
Vit	0	4.05996	0.716	0.119	0
Crispld2	0	5.98808	0.642	0.051	0
Smoc2	0	3.57708	0.683	0.1	0
Pdgfra	0	5.52398	0.553	0.039	0
Scara5	0	4.62364	0.543	0.044	0
9130410C08Rik	0	4.13882	0.51	0.049	0
Lum	0	5.09641	0.393	0.03	0
Mmp2	0	5.46022	0.376	0.019	0
Podn	0	5.22825	0.363	0.022	0
Dcn	1.99348e-299	4.06433	0.924	0.265	5.42347e-295
Bmp5	2.0675e-296	5.01701	0.5	0.056	5.62485e-292
Col15a1	1.12055e-289	4.43472	0.751	0.15	3.04857e-285
Tgfbi	1.80296e-286	3.70526	0.64	0.097	4.90514e-282
Atp8b1	1.07015e-274	4.32639	0.536	0.07	2.91146e-270
Plekhh2	2.32912e-270	4.49999	0.536	0.072	6.33661e-266
Tbx18	1.13964e-267	5.69367	0.188	0.007	3.1005e-263
Apod	1.70353e-261	4.24314	0.995	0.483	4.63463e-257
Ror1	1.30194e-256	3.46801	0.863	0.235	3.54205e-252
Osr2	1.85026e-254	6.82818	0.109	0.001	5.03382e-250
Gli1	4.42327e-253	3.40476	0.434	0.046	1.2034e-248
Sned1	1.83742e-252	4.27147	0.848	0.249	4.99889e-248
Slc1a3	2.36003e-250	4.04258	0.668	0.126	6.42069e-246
Abca9	1.82536e-243	3.87446	0.589	0.096	4.96609e-239
Sult5a1	3.27564e-242	4.66039	0.302	0.022	8.91169e-238
Bicc1	4.71512e-238	3.73955	0.858	0.278	1.2828e-233
Meox2	2.92347e-234	2.99931	0.513	0.07	7.9536e-230
Cp	4.13482e-233	3.29537	0.863	0.267	1.12492e-228
Inpp4b	7.18661e-230	3.77546	0.683	0.145	1.95519e-225
Lama2	3.33938e-228	2.90827	0.992	0.502	9.08511e-224
Fap	5.4274e-224	3.5692	0.538	0.084	1.47658e-219
Dlc1	8.28257e-223	3.43481	0.97	0.539	2.25336e-218
Pdzrn3	7.91082e-214	3.71007	0.789	0.229	2.15222e-209
Stxbp6	6.1461e-211	2.65572	0.835	0.227	1.67211e-206
Pid1	1.77058e-208	2.67683	0.797	0.22	4.81703e-204
Gli2	4.76349e-206	3.55756	0.416	0.052	1.29596e-201
Colec12	4.44479e-200	3.56739	0.51	0.084	1.20925e-195
Foxd2os	5.11848e-194	3.23356	0.497	0.08	1.39253e-189
Tcf4	3.68771e-187	2.6281	0.949	0.51	1.00328e-182
Tenm2	6.5986e-186	3.21879	0.858	0.338	1.79521e-181
Steap4	3.56763e-182	4.66274	0.183	0.01	9.7061e-178
Rhoj	6.97152e-169	3.22624	0.701	0.197	1.89667e-164
Sulf1	3.02362e-168	2.75971	0.827	0.318	8.22606e-164
Lrp4	7.01133e-167	3.43234	0.457	0.079	1.9075e-162
Ntn4	3.88063e-166	3.88564	0.49	0.094	1.05576e-161
Hpca	6.80882e-166	4.3737	0.401	0.063	1.85241e-161
Prrx1	3.45904e-164	2.84549	0.406	0.06	9.41067e-160
Aebp1	1.64146e-163	3.58867	0.414	0.065	4.46575e-159
Sox8	2.54578e-161	4.61485	0.223	0.019	6.92605e-157
Col3a1	9.14534e-161	3.03418	0.53	0.109	2.48808e-156
Ltbp1	7.21284e-159	3.7253	0.454	0.084	1.96232e-154
Gm42047	1.2846e-158	4.18773	0.358	0.05	3.49489e-154
Agmo	4.772e-152	2.90963	0.749	0.266	1.29827e-147
Chrm3	1.59629e-151	3.90014	0.472	0.095	4.34286e-147
Col1a2	1.6841e-149	2.50062	0.789	0.295	4.58175e-145
Foxp2	2.03966e-147	2.02369	0.683	0.188	5.54911e-143
Ccl11	3.92432e-144	4.93209	0.135	0.007	1.06765e-139
Eya2	7.36073e-144	1.96415	0.622	0.155	2.00256e-139
Col1a1	4.99812e-140	2.83158	0.518	0.115	1.35979e-135
Col6a3	1.85345e-137	3.23047	0.426	0.081	5.0425e-133
Sipa1l1	1.10547e-133	2.65784	0.812	0.395	3.00755e-129
Cyp2s1	1.25869e-132	4.42872	0.162	0.012	3.42439e-128
Myoc	1.50588e-129	3.79061	0.208	0.02	4.09691e-125
Col26a1	4.29088e-129	3.23314	0.472	0.106	1.16738e-124
Pax9	5.86714e-128	3.0354	0.244	0.027	1.59621e-123
Vcan	2.75468e-127	4.45923	0.338	0.056	7.49438e-123
Tshz3	1.26696e-125	2.69583	0.802	0.411	3.4469e-121
Itgbl1	3.21591e-125	3.07159	0.482	0.112	8.74922e-121
Sox9	5.99793e-125	4.38173	0.173	0.014	1.6318e-120
Hlf	2.79999e-122	3.12285	0.421	0.087	7.61767e-118
Dcbld2	1.70047e-121	3.14705	0.673	0.27	4.62631e-117
Zbtb16	4.46375e-121	2.49859	0.723	0.286	1.21441e-116
Gfpt2	8.6621e-121	4.21869	0.19	0.018	2.35661e-116
Zbtb20	7.06987e-119	1.23952	0.992	0.933	1.92343e-114
Cdkn2a	2.72464e-118	4.83379	0.168	0.014	7.41266e-114
Pde9a	4.23642e-118	4.00777	0.246	0.031	1.15256e-113
1700047M11Rik	7.85094e-118	4.1821	0.155	0.012	2.13593e-113
Cyp27a1	3.15925e-117	3.29811	0.355	0.065	8.59505e-113
Clec2d	4.01168e-115	2.76628	0.386	0.075	1.09142e-110
Dst	1.0577e-114	-1.79513	0.67	0.933	2.87759e-110
Tmem45a	1.16905e-114	4.751	0.157	0.013	3.18052e-110
Kcnt2	2.05416e-114	2.64822	0.536	0.149	5.58854e-110
Gm48025	4.63729e-114	3.93444	0.317	0.054	1.26162e-109
Efemp1	7.76293e-114	2.82883	0.51	0.136	2.11198e-109
Steap3	1.56542e-112	3.52012	0.457	0.116	4.25889e-108
Abca6	2.5274e-112	3.71987	0.602	0.22	6.87605e-108
Dpep1	4.30217e-110	4.94252	0.147	0.012	1.17045e-105
Mrc2	1.29402e-109	2.51212	0.449	0.105	3.52052e-105
Sox5	3.5564e-107	2.34791	0.69	0.281	9.67554e-103
Pcolce	2.30393e-106	2.83447	0.345	0.065	6.26808e-102
Plxdc1	2.527e-105	3.70683	0.345	0.069	6.87496e-101
Trpm6	5.76833e-105	3.85816	0.297	0.051	1.56933e-100
Trabd2b	1.46371e-104	2.90267	0.373	0.078	3.98218e-100
Rbpms	6.52655e-104	2.46991	0.495	0.135	1.77561e-99
C1s1	1.23554e-103	3.9887	0.195	0.022	3.36142e-99
Igf1	3.82626e-102	3.00966	0.299	0.052	1.04097e-97
Gm42397	3.89608e-102	4.11732	0.251	0.037	1.05997e-97
Ddr2	5.35048e-102	2.53839	0.513	0.149	1.45565e-97
Pld1	1.6766e-101	2.48306	0.662	0.27	4.56135e-97
Maml3	8.23656e-100	2.21389	0.726	0.34	2.24084e-95
Rasgrp2	1.19223e-99	3.36174	0.282	0.047	3.24358e-95
Abca8a	6.70975e-99	1.67378	0.881	0.437	1.82545e-94
Adamts12	1.5206e-98	3.85622	0.47	0.135	4.13694e-94
Ebf1	1.42721e-96	1.73945	0.942	0.606	3.88286e-92
Slco2b1	1.93542e-96	3.00944	0.287	0.049	5.26549e-92
Slc6a13	4.56621e-96	3.87814	0.188	0.022	1.24228e-91
D630003M21Rik	1.56773e-95	3.54457	0.261	0.042	4.26517e-91
Itpr2	1.70974e-95	2.19089	0.576	0.193	4.65153e-91
Cadm1	1.8516e-94	-2.57457	0.325	0.793	5.03745e-90
Sdc2	4.32251e-94	2.75544	0.563	0.198	1.17598e-89
Arhgap32	1.32827e-90	2.06805	0.784	0.512	3.61369e-86
Mill2	8.10125e-90	2.59	0.538	0.184	2.20403e-85
Trf	5.83106e-89	3.29583	0.266	0.047	1.5864e-84
Col8a1	5.68293e-88	2.59965	0.543	0.188	1.5461e-83
9530026P05Rik	1.5033e-87	1.90572	0.799	0.444	4.08989e-83
Grin2b	9.79778e-87	4.58691	0.307	0.065	2.66559e-82
Fndc3b	4.67348e-85	2.13462	0.708	0.364	1.27147e-80
Eps8	1.73652e-84	2.73218	0.431	0.124	4.72437e-80
Medag	3.50846e-84	3.35749	0.241	0.04	9.5451e-80
Nkain2	5.2686e-84	-3.01534	0.201	0.696	1.43338e-79
Gm47939	7.88248e-84	4.20401	0.145	0.015	2.14451e-79
Adam12	1.20202e-83	3.1216	0.391	0.104	3.27022e-79
Pex5l	3.65285e-83	-3.23758	0.102	0.639	9.93795e-79
Fbn2	6.1147e-83	3.32281	0.365	0.092	1.66357e-78
Luzp2	1.69381e-82	-2.99252	0.152	0.669	4.60819e-78
Adamtsl1	2.17239e-81	2.42589	0.49	0.162	5.91021e-77
Xist	1.6155e-80	1.21372	0.957	0.797	4.39512e-76
Per3	1.79745e-79	1.89025	0.734	0.405	4.89013e-75
4930594M22Rik	2.17335e-79	3.41752	0.404	0.119	5.91281e-75
Pamr1	2.84453e-79	3.91915	0.183	0.025	7.73882e-75
Pbx1	8.16204e-79	1.6127	0.865	0.607	2.22057e-74
Adamts2	9.02978e-79	2.53867	0.439	0.133	2.45664e-74
Fbn1	1.10017e-77	2.41484	0.492	0.172	2.99311e-73
Stk32b	5.79383e-77	4.43453	0.206	0.033	1.57627e-72
Airn	1.49079e-76	1.77875	0.731	0.381	4.05584e-72
Zeb1	1.72472e-76	1.73909	0.822	0.627	4.69227e-72
Cdkn2b	2.94821e-76	4.51211	0.135	0.014	8.02089e-72
Nalcn	9.01453e-76	2.30802	0.619	0.296	2.45249e-71
Ldlrad4	2.29805e-75	1.85595	0.683	0.324	6.25207e-71
Dock5	5.77691e-75	2.06996	0.642	0.304	1.57167e-70
Ngf	1.32396e-74	3.17266	0.223	0.038	3.60197e-70
Nid1	1.83391e-74	2.27949	0.543	0.208	4.98933e-70
Nhsl2	4.25927e-74	2.51484	0.52	0.197	1.15878e-69
Adgrl3	8.96036e-74	-2.75026	0.226	0.689	2.43776e-69
Ctnnd2	9.64117e-74	-3.08702	0.168	0.654	2.62298e-69
Greb1	9.83861e-74	2.85086	0.444	0.148	2.67669e-69
Twist2	2.87552e-73	3.93466	0.127	0.013	7.82313e-69
Sorcs2	4.65983e-73	2.10187	0.566	0.227	1.26775e-68
Sgip1	7.40131e-72	2.38272	0.662	0.349	2.0136e-67
Akap13	2.73415e-71	1.53454	0.799	0.582	7.43853e-67
Rora	4.08227e-71	1.23879	0.919	0.667	1.11062e-66
Aff3	4.14862e-71	1.74531	0.794	0.509	1.12867e-66
Reln	3.51565e-70	2.44982	0.533	0.214	9.56468e-66
Lrp1	1.51698e-69	2.08544	0.68	0.392	4.1271e-65
Ncam1	2.09485e-69	-2.8319	0.18	0.645	5.69925e-65
Acss3	4.25627e-69	2.43295	0.439	0.145	1.15796e-64
Ldb2	2.3952e-66	1.4724	0.756	0.392	6.51637e-62
Il1rapl1	5.33417e-66	-2.81273	0.17	0.627	1.45121e-61
Cemip	7.45195e-66	4.89951	0.302	0.08	2.02738e-61
Efnb2	2.26897e-65	3.06201	0.421	0.15	6.17296e-61
Loxl2	2.54688e-65	3.09358	0.287	0.069	6.92903e-61
Ptprt	2.7108e-65	-2.83208	0.162	0.613	7.37501e-61
Cspg4	5.07103e-64	2.48173	0.322	0.084	1.37962e-59
Sec16b	3.07996e-63	4.61217	0.152	0.022	8.37934e-59
Ppm1l	1.07e-61	-2.49636	0.119	0.573	2.91105e-57
Fn1	3.04059e-61	3.21366	0.299	0.079	8.27224e-57
Eda2r	8.20636e-61	3.97949	0.102	0.01	2.23262e-56
Col5a2	3.06535e-60	1.82064	0.589	0.267	8.33958e-56
Tshz2	6.5411e-60	0.96502	0.914	0.666	1.77957e-55
Smad3	6.5987e-60	2.68569	0.322	0.09	1.79524e-55
Il1r1	6.73172e-60	3.16304	0.365	0.12	1.83143e-55
Ptch2	9.21159e-60	3.40055	0.127	0.016	2.50611e-55
Ccdc170	1.03016e-59	4.32073	0.19	0.035	2.80265e-55
Sorbs1	2.90556e-58	-1.79697	0.36	0.766	7.90486e-54
Dmd	3.38575e-58	-2.56514	0.31	0.689	9.21127e-54
Klf12	3.40911e-58	1.50155	0.706	0.402	9.27481e-54
Kif1a	4.06559e-58	-2.13031	0.216	0.644	1.10608e-53
Eya1	1.49467e-57	2.51374	0.228	0.049	4.06639e-53
Lvrn	1.70152e-57	4.4365	0.152	0.024	4.62915e-53
Esr1	1.77974e-57	2.31877	0.414	0.15	4.84196e-53
Adgrb3	2.0755e-57	-3.49245	0.132	0.558	5.64661e-53
Enox1	7.93577e-57	-2.8684	0.17	0.571	2.15901e-52
Lrrk1	1.30092e-56	2.2257	0.416	0.151	3.53929e-52
Itga5	3.04894e-56	2.84273	0.228	0.051	8.29495e-52
Tec	5.63861e-56	2.06901	0.505	0.22	1.53404e-51
Mapt	1.61474e-55	-1.90087	0.259	0.655	4.39306e-51
Sec24d	4.44923e-55	2.23437	0.525	0.251	1.21046e-50
Pclo	4.48778e-55	-2.58563	0.152	0.556	1.22094e-50
Edil3	5.82036e-55	-2.1165	0.294	0.68	1.58349e-50
Cpxm1	6.72126e-55	3.45466	0.221	0.049	1.82859e-50
Arhgap24	3.22996e-54	1.33906	0.789	0.538	8.78743e-50
Aatk	3.45601e-54	-2.70367	0.142	0.562	9.40243e-50
Cfh	4.60881e-54	1.78583	0.335	0.099	1.25387e-49
Eepd1	4.96852e-54	-2.70303	0.124	0.542	1.35174e-49
Slc9a9	5.17699e-54	-2.67152	0.223	0.601	1.40845e-49
Sgcd	7.56933e-54	-1.63685	0.376	0.745	2.05931e-49
Slc25a21	8.96037e-54	2.38037	0.373	0.131	2.43776e-49
Eda	1.39449e-53	2.08627	0.541	0.258	3.79386e-49
Etv4	1.81445e-53	2.67874	0.234	0.054	4.93638e-49
Arhgap39	4.98314e-53	-2.40982	0.185	0.595	1.35571e-48
Kif21a	5.3536e-53	-1.38214	0.584	0.828	1.4565e-48
Lamc3	6.9512e-53	3.55335	0.145	0.023	1.89114e-48
Cpne8	7.24779e-53	2.02559	0.627	0.381	1.97183e-48
Adam33	7.70411e-53	2.46368	0.198	0.04	2.09598e-48
Tanc2	1.09915e-52	-1.69328	0.277	0.688	2.99034e-48
Ror2	3.313e-52	2.00722	0.538	0.264	9.01334e-48
Kif1b	7.45729e-52	-1.25332	0.66	0.883	2.02883e-47
Sorcs1	1.00631e-51	-3.17674	0.15	0.542	2.73776e-47
Lrrc4c	1.16679e-51	-3.09242	0.132	0.54	3.17436e-47
Gcnt2	1.20394e-51	-2.35846	0.135	0.545	3.27545e-47
Dennd2a	1.36815e-51	1.96052	0.538	0.254	3.72219e-47
C1qtnf7	1.59541e-51	2.49969	0.284	0.08	4.34046e-47
Grik2	2.13595e-51	-2.98191	0.135	0.54	5.81106e-47
Ptprf	3.98479e-51	-1.93276	0.188	0.604	1.0841e-46
Grid2	1.51171e-50	-2.72611	0.147	0.539	4.11276e-46
Zic1	1.58842e-50	1.89022	0.244	0.059	4.32146e-46
Cd38	2.53409e-50	3.14108	0.15	0.025	6.89425e-46
Ctnna2	4.30038e-50	-3.29156	0.264	0.603	1.16996e-45
Tgm2	6.7182e-50	2.6183	0.188	0.038	1.82775e-45
Gxylt2	8.74149e-50	2.65579	0.236	0.059	2.37821e-45
Klf7	1.00432e-49	-1.25299	0.5	0.814	2.73236e-45
Prickle1	1.17511e-49	2.15783	0.459	0.198	3.19699e-45
Rcsd1	2.06467e-49	2.3035	0.31	0.094	5.61715e-45
Nipal1	2.06957e-49	3.31791	0.132	0.02	5.63048e-45
9330159F19Rik	4.16476e-49	-2.5562	0.096	0.496	1.13306e-44
Dtna	6.50263e-49	-1.99396	0.157	0.561	1.76911e-44
Lamc1	8.39361e-49	1.77948	0.66	0.421	2.28356e-44
Ptch1	1.17683e-48	1.96692	0.629	0.388	3.20169e-44
Lpp	1.56289e-48	1.12009	0.843	0.725	4.25201e-44
Htra3	1.58844e-48	2.90355	0.19	0.04	4.32151e-44
Arhgap6	2.21523e-48	2.44174	0.411	0.167	6.02674e-44
Ube2e2	3.38766e-48	1.40893	0.736	0.49	9.21648e-44
Dclk2	5.57189e-48	-2.94184	0.086	0.475	1.51589e-43
Chd9	2.09182e-47	0.902775	0.896	0.792	5.69099e-43
Foxd1	2.36854e-47	2.18439	0.195	0.042	6.44384e-43
Axl	2.5073e-47	2.0164	0.345	0.116	6.82136e-43
Kcnk2	2.74282e-47	2.74805	0.406	0.172	7.46212e-43
9530059O14Rik	5.88855e-47	-3.26876	0.178	0.526	1.60204e-42
Pla2r1	7.788e-47	3.12332	0.246	0.067	2.1188e-42
Slc35f1	8.6937e-47	-2.64127	0.178	0.558	2.36521e-42
Creb3l2	1.31946e-46	2.23457	0.525	0.274	3.58972e-42
Elavl4	4.00765e-46	-2.39853	0.211	0.552	1.09032e-41
Csmd2	4.68787e-46	-2.71244	0.096	0.476	1.27538e-41
Oxr1	5.95305e-46	-1.89576	0.284	0.637	1.61959e-41
Lifr	6.1669e-46	-1.70754	0.302	0.656	1.67777e-41
2610035D17Rik	7.12295e-46	1.44843	0.716	0.465	1.93787e-41
Soga3	2.21003e-45	-2.03067	0.173	0.548	6.01261e-41
Rere	2.32951e-45	0.928891	0.876	0.735	6.33766e-41
Nav3	2.77903e-45	-2.60234	0.152	0.531	7.56062e-41
Ghr	3.00091e-45	1.32637	0.701	0.46	8.16426e-41
Rgma	3.39823e-45	2.58214	0.322	0.11	9.24522e-41
Gpc4	6.42455e-45	2.53665	0.33	0.115	1.74786e-40
Vps13b	8.84994e-45	1.33465	0.746	0.575	2.40771e-40
Spaar	9.26982e-45	3.88734	0.107	0.015	2.52195e-40
Srgap3	3.05978e-44	-1.71985	0.19	0.582	8.32445e-40
Pcdh9	3.79223e-44	-1.63339	0.497	0.784	1.03172e-39
Hcn1	6.67744e-44	-2.86957	0.137	0.496	1.81666e-39
Cyp2d22	7.52534e-44	2.3045	0.302	0.098	2.04734e-39
Rims2	8.95693e-44	-2.76525	0.124	0.482	2.43682e-39
Scube1	1.67099e-43	2.71948	0.234	0.064	4.5461e-39
Dysf	2.71368e-43	-2.61558	0.086	0.457	7.38285e-39
Il33	3.80845e-43	3.63631	0.223	0.061	1.03613e-38
Zdhhc2	5.60463e-43	-1.94146	0.173	0.546	1.52479e-38
Ncam2	7.19876e-43	-3.20427	0.122	0.478	1.9585e-38
Cadps	7.31572e-43	-2.60703	0.193	0.522	1.99031e-38
Adam22	7.92963e-43	-2.73642	0.079	0.438	2.15734e-38
Kcnb2	9.96667e-43	-2.79038	0.287	0.588	2.71153e-38
Efhd1	1.8064e-42	3.0127	0.188	0.044	4.91448e-38
Pkdcc	2.07887e-42	2.56963	0.284	0.092	5.65576e-38
Matn2	2.20432e-42	1.28741	0.668	0.397	5.99708e-38
Gab2	2.40362e-42	1.37977	0.713	0.514	6.53929e-38
Reps2	2.4383e-42	2.12105	0.51	0.283	6.63364e-38
Dnajc6	2.88193e-42	-2.42261	0.109	0.474	7.84059e-38
Glipr2	4.36203e-42	3.27507	0.256	0.079	1.18673e-37
Amph	4.63756e-42	-2.48562	0.091	0.457	1.26169e-37
Nrp2	4.81847e-42	1.86821	0.566	0.326	1.31091e-37
Pard3b	6.09071e-42	1.03957	0.802	0.527	1.65704e-37
Sv2c	6.2616e-42	-2.04024	0.145	0.511	1.70353e-37
Ctnnal1	8.92389e-42	-2.45941	0.114	0.477	2.42783e-37
Tmod2	1.0071e-41	-1.52347	0.239	0.626	2.73991e-37
Kdelr3	2.35837e-41	2.96545	0.132	0.024	6.41618e-37
Stk3	2.41272e-41	1.60509	0.612	0.392	6.56403e-37
Scn9a	2.62455e-41	-2.24032	0.208	0.535	7.14036e-37
Zfp521	2.77444e-41	1.46973	0.596	0.345	7.54815e-37
Ccser2	5.7686e-41	-1.26151	0.32	0.667	1.56941e-36
A230001M10Rik	1.11919e-40	4.20978	0.112	0.018	3.04487e-36
Cdh2	1.24907e-40	-2.67934	0.079	0.43	3.39821e-36
Nrxn1	1.28144e-40	-2.3605	0.299	0.597	3.48629e-36
Frmd3	1.63964e-40	-2.45838	0.112	0.464	4.46081e-36
Tacc1	1.74256e-40	1.47639	0.706	0.537	4.74081e-36
Clic6	1.89506e-40	3.12774	0.114	0.019	5.15569e-36
Sox2ot	2.1594e-40	-3.38252	0.117	0.452	5.87487e-36
Svil	3.24211e-40	1.7339	0.523	0.283	8.8205e-36
D730045B01Rik	5.43233e-40	2.86459	0.165	0.036	1.47792e-35
Gli3	6.78071e-40	2.17182	0.287	0.095	1.84476e-35
Trim2	7.3525e-40	-1.51184	0.345	0.683	2.00032e-35
Adam23	7.60368e-40	-2.42801	0.135	0.479	2.06866e-35
Lima1	8.19004e-40	1.79486	0.556	0.323	2.22818e-35
Sdk1	1.23968e-39	-2.40308	0.168	0.514	3.37266e-35
Casp4	1.62487e-39	2.41502	0.216	0.058	4.42061e-35
Bach2	2.06746e-39	-1.68952	0.241	0.59	5.62474e-35
Clec1a	3.23043e-39	2.46478	0.18	0.043	8.78871e-35
Enpep	3.2837e-39	3.57192	0.109	0.018	8.93363e-35
Cblb	3.50656e-39	1.8482	0.538	0.32	9.53994e-35
Miat	4.83431e-39	-3.45014	0.066	0.392	1.31522e-34
Pknox2	5.18588e-39	1.63536	0.627	0.425	1.41087e-34
Kcnh7	7.05685e-39	-3.1374	0.17	0.488	1.91989e-34
B130024G19Rik	7.29924e-39	1.77929	0.447	0.205	1.98583e-34
Nrg3	1.07115e-38	-3.43718	0.195	0.503	2.91418e-34
Col6a1	1.10991e-38	2.09115	0.211	0.056	3.01962e-34
Nlgn1	1.32941e-38	-2.73598	0.124	0.459	3.61679e-34
Rapgef3	1.50664e-38	2.17899	0.226	0.063	4.09898e-34
Ptn	1.72042e-38	-2.20483	0.137	0.485	4.68057e-34
Nova1	1.90352e-38	2.90521	0.244	0.076	5.17872e-34
Scarf2	2.06077e-38	2.03691	0.152	0.032	5.60653e-34
Lrmda	2.14025e-38	1.14911	0.741	0.521	5.82275e-34
Ano6	2.48884e-38	1.32035	0.69	0.517	6.77114e-34
Rgs7bp	2.77604e-38	-1.9504	0.277	0.581	7.55251e-34
Ppp2r2b	3.39267e-38	-2.15933	0.157	0.492	9.2301e-34
Nkd2	3.89673e-38	3.63279	0.129	0.025	1.06014e-33
Slc24a2	6.57128e-38	-2.39843	0.157	0.484	1.78778e-33
Igfbp7	7.19136e-38	1.63741	0.305	0.106	1.95648e-33
Elavl2	8.43547e-38	-2.25797	0.188	0.502	2.29495e-33
Fam114a1	8.88333e-38	1.75542	0.462	0.226	2.4168e-33
Atp8a1	9.5448e-38	-1.24095	0.434	0.744	2.59676e-33
Cadm2	9.67411e-38	-2.24635	0.19	0.516	2.63194e-33
Gm26871	1.13039e-37	-3.2639	0.168	0.472	3.07534e-33
Akap6	1.14508e-37	-2.33643	0.206	0.513	3.11531e-33
Etv1	1.3383e-37	1.55693	0.548	0.307	3.64099e-33
Grip1	1.69027e-37	-3.14421	0.142	0.453	4.59854e-33
Rgs7	2.56821e-37	-2.96508	0.086	0.415	6.98707e-33
Kcnma1	2.63246e-37	-2.94929	0.094	0.418	7.16187e-33
Gm30613	3.10335e-37	4.6546	0.124	0.024	8.44297e-33
Trim36	3.20101e-37	-2.46379	0.096	0.424	8.70866e-33
Retreg1	3.30602e-37	-1.6939	0.175	0.537	8.99435e-33
Hspg2	3.89512e-37	1.61677	0.464	0.224	1.05971e-32
Igsf11	8.94733e-37	-3.54462	0.066	0.38	2.43421e-32
Prelp	1.10928e-36	2.63523	0.132	0.026	3.01791e-32
Col5a1	1.35509e-36	2.10955	0.277	0.094	3.68667e-32
Kif5c	1.93459e-36	-2.16789	0.213	0.532	5.26325e-32
Ak5	2.03692e-36	-2.9287	0.069	0.392	5.54164e-32
Snhg14	3.60413e-36	-2.87171	0.094	0.411	9.80538e-32
Prune2	3.60993e-36	-1.87662	0.515	0.709	9.82117e-32
Nek1	4.03162e-36	-1.47938	0.274	0.603	1.09684e-31
Gas7	6.18346e-36	1.52584	0.459	0.221	1.68227e-31
Emp1	7.50732e-36	2.46972	0.175	0.043	2.04244e-31
Tgfbr3	7.92762e-36	1.06568	0.761	0.567	2.15679e-31
Galnt17	8.34253e-36	-1.87848	0.294	0.588	2.26967e-31
Mtcl1	9.3647e-36	-2.16115	0.112	0.444	2.54776e-31
Rnf165	9.84366e-36	3.4586	0.188	0.051	2.67807e-31
Erc2	9.91052e-36	-3.11133	0.135	0.435	2.69626e-31
5330434G04Rik	1.14586e-35	-3.09489	0.051	0.361	3.11742e-31
Nrcam	1.23034e-35	-2.67712	0.066	0.386	3.34727e-31
Gm4258	1.25848e-35	-2.24692	0.091	0.421	3.42383e-31
Mamdc2	1.29297e-35	1.77483	0.579	0.379	3.51764e-31
Osmr	1.38233e-35	2.26683	0.294	0.109	3.76078e-31
Gm15902	1.59347e-35	2.67157	0.168	0.041	4.3352e-31
Gpm6b	2.60498e-35	-1.51621	0.393	0.715	7.08711e-31
Samd12	5.1427e-35	-2.89658	0.053	0.362	1.39912e-30
Rims1	5.72531e-35	-2.53349	0.145	0.454	1.55763e-30
Fto	6.54436e-35	1.11792	0.731	0.583	1.78046e-30
Cacnb4	9.21368e-35	-2.34049	0.129	0.448	2.50667e-30
Ptpn13	9.33458e-35	1.09993	0.703	0.49	2.53957e-30
Unc80	1.69918e-34	-2.59029	0.109	0.422	4.62279e-30
Cyp26b1	2.85158e-34	3.97251	0.109	0.02	7.75801e-30
Plce1	3.24962e-34	-2.53234	0.175	0.479	8.84093e-30
Grid1	4.28174e-34	-2.59259	0.071	0.381	1.16489e-29
Dnm1	5.03039e-34	1.68073	0.581	0.403	1.36857e-29
Unc79	7.62238e-34	-3.42201	0.036	0.329	2.07375e-29
Dync1i1	7.92828e-34	-2.15119	0.132	0.439	2.15697e-29
Hmgcs1	8.0507e-34	-1.38378	0.231	0.575	2.19027e-29
Scd2	8.42872e-34	-1.28276	0.388	0.704	2.29312e-29
Itga7	8.61455e-34	-2.4411	0.069	0.383	2.34367e-29
Syt1	8.97041e-34	-2.65606	0.221	0.508	2.44049e-29
A2m	9.0791e-34	3.58177	0.221	0.071	2.47006e-29
Cyfip2	9.39214e-34	-1.62488	0.147	0.478	2.55523e-29
Schip1	1.14411e-33	-2.47996	0.15	0.477	3.11266e-29
Dock4	1.16567e-33	-2.03836	0.142	0.461	3.17132e-29
Ppp2r2c	1.22897e-33	-2.36901	0.089	0.4	3.34354e-29
Dlgap1	2.05917e-33	-1.37292	0.322	0.647	5.60217e-29
Dock3	2.35749e-33	-2.43371	0.084	0.391	6.41379e-29
Me1	2.65011e-33	-1.8737	0.129	0.458	7.2099e-29
Rbfox1	2.72238e-33	1.09266	0.883	0.782	7.4065e-29
Kctd16	2.93339e-33	-3.45188	0.137	0.427	7.98058e-29
Cdh1	3.02248e-33	-2.30084	0.099	0.411	8.22297e-29
Ptprz1	3.21456e-33	-3.09547	0.086	0.385	8.74553e-29
Myt1l	3.46863e-33	-2.56984	0.114	0.414	9.43675e-29
Peak1	3.57848e-33	1.60531	0.637	0.502	9.7356e-29
Wipf1	3.91075e-33	1.40171	0.635	0.447	1.06396e-28
Grik3	4.87414e-33	-1.88381	0.178	0.503	1.32606e-28
Sorcs3	5.10816e-33	2.18984	0.391	0.19	1.38973e-28
Cntn1	5.69694e-33	-2.14102	0.157	0.469	1.54991e-28
Cd34	5.89299e-33	2.53122	0.221	0.07	1.60325e-28
Cntnap2	6.1119e-33	-2.77806	0.419	0.646	1.6628e-28
Add3	7.61019e-33	1.25412	0.66	0.472	2.07043e-28
Bicd1	1.07107e-32	-1.29744	0.294	0.614	2.91396e-28
Kcna6	1.1061e-32	-2.55439	0.071	0.373	3.00925e-28
C78859	1.12183e-32	-2.96575	0.058	0.351	3.05204e-28
Lrfn5	1.2635e-32	-3.21357	0.086	0.375	3.43748e-28
Gabbr2	1.26592e-32	-2.053	0.109	0.416	3.44407e-28
Cdr1os	1.5369e-32	-2.56728	0.091	0.392	4.1813e-28
Sntb1	1.54605e-32	-2.4858	0.15	0.449	4.20617e-28
Klhl29	1.56475e-32	-1.79933	0.188	0.499	4.25707e-28
Kcna2	1.7088e-32	-1.7036	0.157	0.489	4.64896e-28
Naalad2	1.86979e-32	3.19291	0.17	0.045	5.08694e-28
Dpp6	2.00896e-32	-2.36699	0.279	0.548	5.46558e-28
Tcf12	2.89616e-32	0.939717	0.766	0.615	7.8793e-28
Anks1b	3.20964e-32	-1.91925	0.226	0.525	8.73214e-28
Lamb2	3.24572e-32	1.69955	0.294	0.11	8.8303e-28
Ablim1	3.26425e-32	-1.85167	0.162	0.469	8.88072e-28
Sema6d	3.39809e-32	-2.0364	0.173	0.475	9.24484e-28
Kcnh8	3.75588e-32	-3.58974	0.043	0.328	1.02182e-27
Zswim6	5.09872e-32	-1.40908	0.269	0.598	1.38716e-27
Nrg1	6.43743e-32	-2.83921	0.162	0.454	1.75137e-27
Scn10a	7.17181e-32	-2.52938	0.15	0.439	1.95116e-27
Hecw1	1.24174e-31	-2.34789	0.137	0.43	3.37828e-27
Csrnp3	1.36071e-31	-2.59098	0.069	0.362	3.70194e-27
Nrxn3	1.41674e-31	-2.69094	0.223	0.496	3.85439e-27
Hspa4l	1.65603e-31	-1.8886	0.112	0.422	4.50539e-27
Ldlrad3	1.72895e-31	1.43234	0.51	0.286	4.70378e-27
Usp50	1.89249e-31	2.41851	0.409	0.219	5.14872e-27
Adamts14	2.48757e-31	2.94524	0.155	0.039	6.76768e-27
Snap91	3.25622e-31	-2.27724	0.094	0.39	8.85886e-27
Elovl7	3.71816e-31	-2.36599	0.069	0.363	1.01156e-26
Rapgef5	4.20043e-31	-2.49075	0.071	0.365	1.14277e-26
Cpxm2	4.21614e-31	3.11446	0.127	0.028	1.14704e-26
Msmo1	4.50444e-31	-1.48156	0.122	0.439	1.22548e-26
Sox6	4.88045e-31	0.893981	0.635	0.372	1.32777e-26
Ppp1r14c	4.95508e-31	-3.35519	0.048	0.328	1.34808e-26
Srgap1	6.61815e-31	-1.59326	0.201	0.501	1.80053e-26
Gse1	6.97463e-31	1.7353	0.541	0.359	1.89752e-26
Tnxb	8.49601e-31	1.60415	0.411	0.198	2.31142e-26
Calcrl	8.91294e-31	2.32182	0.226	0.076	2.42486e-26
Elavl3	9.96919e-31	-1.83151	0.155	0.455	2.71222e-26
Cyria	1.14874e-30	2.18338	0.317	0.135	3.12526e-26
Pcbp3	1.27159e-30	-1.79928	0.244	0.521	3.4595e-26
Nr1h3	1.30308e-30	3.03828	0.14	0.033	3.54517e-26
Ttll7	1.34067e-30	-1.47001	0.348	0.622	3.64743e-26
Rrbp1	1.5285e-30	1.26595	0.645	0.486	4.15844e-26
Rbfox3	1.86328e-30	-1.9596	0.157	0.45	5.06924e-26
Cracd	1.91047e-30	-1.83882	0.109	0.409	5.19762e-26
Svep1	2.05746e-30	1.9421	0.178	0.05	5.59754e-26
Utrn	2.63239e-30	0.559198	0.929	0.839	7.16167e-26
Trim9	2.75082e-30	-2.38322	0.053	0.339	7.48388e-26
Gfod1	4.76888e-30	-2.24732	0.053	0.338	1.29742e-25
Lrfn2	4.77102e-30	2.34869	0.33	0.15	1.298e-25
Atp1a2	5.48329e-30	1.17702	0.662	0.454	1.49178e-25
Tmem117	6.40648e-30	-2.48312	0.096	0.382	1.74295e-25
Heg1	6.89574e-30	1.93749	0.358	0.168	1.87605e-25
Crmp1	7.14568e-30	-2.4871	0.051	0.33	1.94405e-25
Fgfr1	7.23383e-30	1.12335	0.716	0.556	1.96804e-25
Galnt13	8.19134e-30	-2.9112	0.091	0.372	2.22854e-25
Robo2	8.7117e-30	-1.88634	0.17	0.454	2.37011e-25
D130009I18Rik	8.88976e-30	-2.95513	0.145	0.42	2.41855e-25
Rab3c	9.89717e-30	-2.22152	0.102	0.392	2.69262e-25
Rin2	1.00036e-29	1.83695	0.487	0.306	2.72157e-25
Gnao1	1.06715e-29	-1.40655	0.332	0.617	2.90329e-25
Ralyl	1.28617e-29	-2.82097	0.173	0.449	3.49916e-25
Fry	1.29685e-29	-1.70577	0.175	0.474	3.5282e-25
Nr2f2	1.39495e-29	1.29051	0.589	0.384	3.79511e-25
L1cam	1.44281e-29	-1.57457	0.122	0.431	3.92531e-25
Nfia	1.51739e-29	0.68607	0.881	0.734	4.12821e-25
Cd302	1.68651e-29	2.48288	0.185	0.055	4.58833e-25
Slc7a11	1.97512e-29	3.74361	0.211	0.071	5.37352e-25
Limch1	2.26541e-29	-1.91528	0.175	0.466	6.16329e-25
Tafa1	2.40536e-29	-3.23644	0.076	0.355	6.54402e-25
Csmd1	2.56322e-29	-1.11838	0.698	0.852	6.97351e-25
Gm32618	2.60644e-29	2.5741	0.246	0.091	7.09109e-25
Cacna1b	2.80376e-29	-2.39397	0.096	0.375	7.62792e-25
Kcnip4	2.8353e-29	-2.56324	0.32	0.573	7.71372e-25
Fdps	3.26525e-29	-1.65722	0.132	0.44	8.88343e-25
Peg3	3.58211e-29	-1.69408	0.162	0.454	9.7455e-25
Por	4.36437e-29	1.47143	0.52	0.331	1.18737e-24
Dpysl5	4.85745e-29	-2.2811	0.056	0.335	1.32152e-24
Kif5a	4.90717e-29	-1.54842	0.289	0.571	1.33504e-24
Naaladl2	5.53626e-29	1.37415	0.665	0.507	1.50619e-24
Frmpd1	6.17623e-29	-2.93869	0.043	0.313	1.68031e-24
Fryl	6.31144e-29	-1.119	0.348	0.649	1.71709e-24
Car10	6.85751e-29	-2.596	0.084	0.358	1.86565e-24
Tspan18	8.5599e-29	-2.31932	0.127	0.411	2.32881e-24
Apbb2	8.97906e-29	1.01487	0.721	0.583	2.44284e-24
Snap25	9.05869e-29	-1.43282	0.312	0.582	2.46451e-24
Map7	1.06964e-28	-2.09036	0.099	0.377	2.91006e-24
Ptpre	1.17528e-28	-2.14045	0.104	0.389	3.19747e-24
Reep1	1.59336e-28	-1.75315	0.168	0.455	4.33489e-24
Plac9	2.19152e-28	1.62134	0.249	0.089	5.96225e-24
Cdh6	2.45014e-28	-3.2368	0.048	0.312	6.66586e-24
Zdhhc14	2.46398e-28	-1.97244	0.102	0.39	6.70351e-24
Hs3st5	2.46407e-28	-3.16665	0.051	0.314	6.70374e-24
Fgf13	2.65497e-28	-1.46031	0.203	0.494	7.22311e-24
Ksr2	2.70449e-28	-2.52015	0.053	0.321	7.35785e-24
Mapk10	2.99991e-28	-1.75149	0.18	0.463	8.16155e-24
Smo	3.04543e-28	1.6624	0.315	0.132	8.2854e-24
Smtn	3.11091e-28	1.32576	0.282	0.106	8.46355e-24
Mapk4	3.32956e-28	-2.82968	0.071	0.34	9.05839e-24
Gpam	3.87052e-28	-2.43956	0.112	0.39	1.05301e-23
Fam189b	4.07497e-28	-1.83764	0.157	0.444	1.10864e-23
Add2	4.82958e-28	-1.7464	0.117	0.402	1.31393e-23
Fmn2	4.89406e-28	-2.05373	0.122	0.405	1.33148e-23
Plec	6.71647e-28	-1.45931	0.266	0.552	1.82728e-23
Grik4	7.13789e-28	-2.43598	0.107	0.374	1.94193e-23
Syt11	7.20238e-28	-1.21913	0.419	0.705	1.95948e-23
Tox	9.26206e-28	-2.67699	0.081	0.346	2.51984e-23
Camk2d	1.06124e-27	-1.25685	0.574	0.798	2.8872e-23
Avil	1.47482e-27	-1.61383	0.185	0.472	4.0124e-23
Spata13	1.55686e-27	-1.35692	0.16	0.462	4.23561e-23
Hmgcr	1.6496e-27	-1.35276	0.117	0.417	4.4879e-23
Pard3	1.65528e-27	1.19743	0.642	0.462	4.50334e-23
Myo18a	1.73125e-27	-1.13477	0.236	0.558	4.71003e-23
1500004A13Rik	1.82522e-27	-1.86752	0.086	0.365	4.96569e-23
Rgs22	1.88295e-27	3.65941	0.147	0.04	5.12276e-23
Prph	2.15724e-27	-1.43971	0.371	0.622	5.86898e-23
Rap1gap	2.34564e-27	-2.2308	0.058	0.326	6.38155e-23
Ctnna3	2.35005e-27	-2.90672	0.132	0.413	6.39354e-23
Pgm2l1	3.1568e-27	-1.59415	0.175	0.467	8.5884e-23
Stmn2	3.64003e-27	-1.20316	0.449	0.689	9.90306e-23
Ccnd3	3.66547e-27	1.14409	0.482	0.276	9.97229e-23
Myo1e	3.67212e-27	-1.33519	0.178	0.482	9.99037e-23
Lix1	3.69359e-27	-1.26972	0.218	0.521	1.00488e-22
Ank1	3.92513e-27	-2.4112	0.091	0.36	1.06787e-22
Cadm3	4.02629e-27	-1.92842	0.084	0.359	1.09539e-22
Osbpl3	4.12735e-27	-1.97534	0.211	0.466	1.12289e-22
Fgf12	4.15229e-27	-2.07699	0.294	0.55	1.12967e-22
Pmepa1	4.40831e-27	-1.73233	0.173	0.457	1.19932e-22
Rbm39	4.57478e-27	0.766005	0.843	0.795	1.24462e-22
Plxna4	5.40085e-27	-2.51931	0.096	0.359	1.46936e-22
Ank2	5.78174e-27	0.455875	0.972	0.829	1.57298e-22
Gabrb3	5.87138e-27	-2.709	0.061	0.319	1.59737e-22
Map6	6.0787e-27	-1.58947	0.165	0.449	1.65377e-22
Ebf4	6.4562e-27	2.26568	0.317	0.147	1.75647e-22
Jakmip1	6.84994e-27	-2.72932	0.033	0.285	1.86359e-22
Ccdc92	6.99627e-27	-1.78892	0.109	0.392	1.9034e-22
Dock7	7.19688e-27	1.08836	0.706	0.587	1.95798e-22
Srrm3	7.90054e-27	-2.56955	0.056	0.315	2.14942e-22
Pde1a	7.98631e-27	1.29192	0.424	0.216	2.17275e-22
Prkd1	9.02515e-27	-1.49483	0.157	0.436	2.45538e-22
Scg3	9.21352e-27	-1.39097	0.228	0.528	2.50663e-22
Ppic	1.17386e-26	2.3142	0.107	0.023	3.19362e-22
Synm	1.37082e-26	-1.73099	0.18	0.465	3.72945e-22
Gm21847	1.48046e-26	3.77633	0.117	0.027	4.02774e-22
Atl1	1.52549e-26	-1.49262	0.112	0.396	4.15025e-22
Ap1s2	1.57167e-26	-1.5243	0.086	0.363	4.2759e-22
Gdap1	1.61149e-26	-2.19346	0.053	0.315	4.38422e-22
Ppp1r1c	1.66667e-26	-1.75745	0.165	0.438	4.53435e-22
Bcan	1.79619e-26	-3.58014	0.03	0.274	4.8867e-22
Snhg11	1.85727e-26	-2.18051	0.378	0.575	5.05288e-22
Gm33906	2.06566e-26	3.25079	0.162	0.049	5.61985e-22
Dpp10	2.22209e-26	-3.38952	0.201	0.453	6.04541e-22
Aff1	2.7087e-26	1.47773	0.561	0.407	7.36928e-22
Sema6a	2.7417e-26	1.27727	0.495	0.289	7.45906e-22
Pkia	2.75407e-26	-1.64789	0.089	0.362	7.49272e-22
Spire2	2.99161e-26	-2.59942	0.041	0.291	8.13896e-22
Jakmip2	3.23503e-26	-2.56851	0.056	0.307	8.80121e-22
Dgki	3.27601e-26	-3.14439	0.152	0.414	8.9127e-22
Mapk8ip1	3.49401e-26	-1.45067	0.122	0.414	9.50581e-22
Il6ra	3.53739e-26	1.64621	0.213	0.072	9.62382e-22
Epb41l2	3.82416e-26	0.895429	0.683	0.491	1.0404e-21
Gpc6	3.96679e-26	0.649063	0.769	0.539	1.0792e-21
Tmem178b	4.1218e-26	-1.7669	0.132	0.403	1.12138e-21
Sgpp2	4.39474e-26	-2.53178	0.051	0.305	1.19563e-21
Kif3c	4.43983e-26	-1.49652	0.129	0.414	1.2079e-21
Mcf2l	6.07384e-26	-2.83835	0.03	0.274	1.65245e-21
Dgkz	6.16214e-26	-1.62439	0.251	0.518	1.67647e-21
Syn1	6.25555e-26	-1.43033	0.124	0.404	1.70189e-21
Egfem1	7.52848e-26	-2.61543	0.074	0.321	2.0482e-21
Nsdhl	7.75821e-26	-1.88246	0.112	0.384	2.1107e-21
Casz1	8.43101e-26	-2.38912	0.069	0.322	2.29374e-21
Wnk4	1.05525e-25	2.54015	0.16	0.047	2.87091e-21
Kcnc3	1.12161e-25	-2.45607	0.038	0.284	3.05144e-21
Kctd8	1.12572e-25	-2.32377	0.14	0.391	3.06263e-21
Nup93	1.18172e-25	-1.94118	0.119	0.382	3.21499e-21
Ap3b2	1.2108e-25	-1.96716	0.086	0.35	3.2941e-21
Kcnh1	1.21098e-25	-2.6603	0.033	0.277	3.29458e-21
Plp1	1.2583e-25	-1.92499	0.19	0.457	3.42334e-21
Sv2b	1.31228e-25	-2.45885	0.069	0.321	3.5702e-21
Prdm5	1.39714e-25	1.71786	0.388	0.204	3.80107e-21
Cdh11	1.56489e-25	-1.34145	0.31	0.584	4.25744e-21
Gng2	1.99518e-25	-1.32638	0.188	0.48	5.42808e-21
Sgcz	2.04584e-25	-3.16638	0.203	0.45	5.56591e-21
Atp8a2	2.08797e-25	-2.15108	0.168	0.43	5.68053e-21
Rtn1	2.18336e-25	-1.02974	0.434	0.689	5.94004e-21
Syn2	2.20599e-25	-1.99638	0.104	0.365	6.00161e-21
Rps6ka2	2.51183e-25	-1.97873	0.058	0.311	6.83369e-21
Fdft1	2.66137e-25	-1.20365	0.185	0.482	7.24052e-21
Fhl1	2.69639e-25	-1.59098	0.094	0.364	7.33579e-21
Agbl4	2.75503e-25	-2.53348	0.086	0.338	7.49535e-21
Fgf1	2.76761e-25	-1.27504	0.178	0.472	7.52956e-21
Hspa12a	2.78319e-25	-1.08323	0.312	0.608	7.57195e-21
Gm49678	2.9515e-25	-3.01188	0.071	0.313	8.02986e-21
Dync1i2	3.22748e-25	-0.938843	0.556	0.739	8.78067e-21
Snrpn	3.67719e-25	-1.29918	0.241	0.521	1.00042e-20
Pcdh10	3.81856e-25	-3.35206	0.028	0.262	1.03888e-20
Septin3	4.49663e-25	-2.15354	0.051	0.301	1.22335e-20
Mblac2	4.64044e-25	-1.66243	0.091	0.355	1.26248e-20
Lhfpl4	5.01206e-25	-1.54841	0.112	0.386	1.36358e-20
Adamts17	5.2525e-25	-4.04555	0.038	0.271	1.42899e-20
Wnt5a	5.42742e-25	2.95589	0.226	0.089	1.47658e-20
Apc2	5.79931e-25	-1.79723	0.066	0.324	1.57776e-20
Tln2	5.83859e-25	-0.996166	0.406	0.687	1.58845e-20
Kcnb1	5.87317e-25	-1.6222	0.122	0.389	1.59786e-20
Pcsk2	6.38677e-25	-1.59677	0.195	0.469	1.73759e-20
Stag1	6.58555e-25	0.806307	0.739	0.613	1.79167e-20
Kcna1	7.14233e-25	-1.99448	0.112	0.375	1.94314e-20
Thsd4	7.24052e-25	1.83789	0.452	0.283	1.96986e-20
Onecut2	8.60377e-25	-2.3634	0.086	0.338	2.34074e-20
St6galnac3	9.00769e-25	-2.84518	0.063	0.307	2.45063e-20
Col11a1	1.08229e-24	1.18339	0.459	0.258	2.94447e-20
Macrod2	1.15328e-24	-1.37292	0.414	0.632	3.1376e-20
Trarg1	1.20541e-24	-1.85757	0.157	0.423	3.27944e-20
Acss2	1.20732e-24	-1.4918	0.109	0.383	3.28464e-20
Lcp1	1.24045e-24	-2.14969	0.058	0.308	3.37476e-20
Tbx15	1.30659e-24	1.36713	0.198	0.067	3.55472e-20
Gnal	1.38992e-24	-1.71491	0.162	0.431	3.78143e-20
Hs6st3	1.88668e-24	-3.58964	0.079	0.314	5.13291e-20
Mpped2	1.88896e-24	-2.19621	0.081	0.333	5.1391e-20
Adap1	1.88902e-24	-1.45068	0.069	0.327	5.13926e-20
Bsn	1.90191e-24	-2.2108	0.046	0.287	5.17434e-20
Fam219a	1.99704e-24	-1.09518	0.277	0.576	5.43314e-20
Wasf1	2.0259e-24	-3.3709	0.015	0.239	5.51168e-20
Gsn	2.09151e-24	1.81021	0.508	0.345	5.69016e-20
Pde4dip	2.51371e-24	-1.62818	0.208	0.464	6.83881e-20
Nebl	2.61089e-24	-1.4401	0.211	0.48	7.10318e-20
Slco3a1	2.97606e-24	-1.29903	0.18	0.463	8.09668e-20
Otud7a	3.14297e-24	-2.37255	0.086	0.33	8.55077e-20
Kcnip3	3.23808e-24	-1.41088	0.152	0.425	8.80953e-20
Enah	3.24712e-24	1.12018	0.612	0.442	8.83412e-20
Cep112	3.52544e-24	1.67924	0.462	0.29	9.59132e-20
Dok6	3.73133e-24	-1.79851	0.096	0.354	1.01515e-19
Cpq	3.95064e-24	1.35111	0.533	0.363	1.07481e-19
Ebf3	4.12242e-24	-2.30154	0.074	0.317	1.12155e-19
Col18a1	4.31638e-24	2.23633	0.228	0.088	1.17432e-19
Cpeb4	4.45861e-24	-1.19845	0.17	0.448	1.21301e-19
Adam11	4.71751e-24	-2.57583	0.048	0.285	1.28345e-19
Prtg	4.91649e-24	2.5829	0.213	0.081	1.33758e-19
Cpne4	5.3482e-24	-2.40983	0.071	0.314	1.45503e-19
Atp1b3	5.64136e-24	-1.18232	0.211	0.499	1.53479e-19
Med12l	6.3794e-24	-1.73079	0.091	0.348	1.73558e-19
Dhcr24	6.71156e-24	-1.47404	0.132	0.404	1.82595e-19
Grm7	6.7382e-24	-2.91051	0.201	0.432	1.83319e-19
Pear1	7.19746e-24	2.058	0.244	0.098	1.95814e-19
Galnt14	7.65073e-24	-2.68287	0.051	0.286	2.08146e-19
Cntn2	8.03971e-24	-2.08729	0.076	0.323	2.18728e-19
Ldlr	8.20012e-24	-1.29279	0.16	0.445	2.23092e-19
Ttyh1	8.45663e-24	-2.78928	0.074	0.307	2.30071e-19
Sc5d	9.53588e-24	-1.69654	0.074	0.325	2.59433e-19
Slc6a15	1.00744e-23	-2.21378	0.041	0.275	2.74083e-19
Frmd5	1.04489e-23	-2.52284	0.053	0.291	2.84273e-19
Acsbg1	1.18704e-23	-3.20556	0.048	0.276	3.22945e-19
Pcyt1b	1.21231e-23	-1.96089	0.063	0.309	3.29821e-19
Shtn1	1.26074e-23	-1.34953	0.18	0.447	3.42998e-19
Acpp	1.45351e-23	-2.42967	0.058	0.294	3.95442e-19
Brsk2	1.61614e-23	-1.82474	0.048	0.288	4.39687e-19
Syt9	1.70272e-23	-3.27018	0.036	0.259	4.63242e-19
Bean1	1.76666e-23	-1.9461	0.071	0.317	4.80636e-19
Ptpn14	1.77566e-23	1.20774	0.36	0.176	4.83085e-19
Snph	1.99218e-23	-2.0881	0.058	0.299	5.41994e-19
Aacs	2.10199e-23	-1.61554	0.071	0.321	5.71867e-19
A830018L16Rik	2.15552e-23	-2.65041	0.099	0.338	5.86431e-19
Ank3	2.36593e-23	-1.32529	0.518	0.698	6.43675e-19
Ptges	2.42232e-23	2.65203	0.119	0.031	6.59016e-19
Syn3	2.65074e-23	-3.34261	0.033	0.254	7.21159e-19
D130043K22Rik	2.70841e-23	-2.05936	0.056	0.292	7.36849e-19
Lrrc8d	2.72468e-23	-0.950548	0.201	0.495	7.41277e-19
Camta1	2.82163e-23	-0.961804	0.437	0.661	7.67652e-19
Fmn1	2.86604e-23	-1.85475	0.241	0.463	7.79734e-19
Rangap1	2.90629e-23	-1.30752	0.094	0.351	7.90685e-19
Herc3	3.04726e-23	-1.68611	0.079	0.329	8.29038e-19
Nacc2	3.07933e-23	-1.08455	0.239	0.517	8.37763e-19
Cldn1	3.11402e-23	2.06917	0.122	0.031	8.47201e-19
Pou4f1	3.36773e-23	-1.46631	0.104	0.364	9.16225e-19
Spock1	3.47485e-23	-2.16392	0.109	0.355	9.45368e-19
Tkt	3.55306e-23	-1.26487	0.17	0.444	9.66646e-19
Exoc6	3.94754e-23	-2.38307	0.056	0.291	1.07397e-18
Zcchc18	4.21102e-23	-1.5054	0.091	0.348	1.14565e-18
Mindy3	4.2562e-23	-1.30621	0.183	0.446	1.15794e-18
Tafa5	4.40666e-23	-2.04234	0.102	0.345	1.19887e-18
Art3	4.42488e-23	-2.17658	0.129	0.37	1.20383e-18
Shroom3	5.319e-23	-1.93256	0.079	0.323	1.44709e-18
Mical2	5.46549e-23	-1.47567	0.104	0.359	1.48694e-18
Gabra2	6.12278e-23	-2.23588	0.058	0.292	1.66576e-18
Rab6b	6.17182e-23	-1.03226	0.353	0.613	1.67911e-18
Pcnx2	6.63789e-23	-2.90058	0.028	0.247	1.8059e-18
Ndrg4	6.67373e-23	-1.18519	0.363	0.623	1.81565e-18
Pygb	6.8221e-23	-1.02982	0.269	0.549	1.85602e-18
Fign	7.07896e-23	-1.77885	0.208	0.454	1.9259e-18
Megf9	7.11881e-23	-1.26627	0.223	0.508	1.93674e-18
Cabp1	7.20461e-23	-1.72439	0.081	0.327	1.96009e-18
Prdm16	7.49479e-23	-1.21722	0.327	0.585	2.03903e-18
D130079A08Rik	7.97851e-23	-3.9898	0.063	0.295	2.17063e-18
Map1b	7.98227e-23	-1.35895	0.871	0.94	2.17166e-18
Rtn4	8.16436e-23	-0.876143	0.533	0.756	2.2212e-18
Maml2	8.52286e-23	0.878483	0.751	0.586	2.31873e-18
Cpeb2	9.15761e-23	-1.06985	0.195	0.486	2.49142e-18
Sox10	9.24336e-23	-2.6837	0.056	0.28	2.51475e-18
Epdr1	9.40738e-23	-1.06714	0.119	0.388	2.55937e-18
Myo1d	9.9243e-23	-1.81829	0.096	0.344	2.7e-18
Shank2	1.12e-22	-3.07102	0.041	0.259	3.04706e-18
Disp2	1.13218e-22	-2.2957	0.051	0.28	3.08021e-18
Plpp3	1.14638e-22	1.172	0.594	0.429	3.11885e-18
Rims3	1.20903e-22	-1.94135	0.053	0.283	3.2893e-18
Armh4	1.32702e-22	-1.84043	0.084	0.33	3.6103e-18
Srcin1	1.34967e-22	-1.79913	0.079	0.322	3.67192e-18
Mast1	1.43355e-22	-1.66075	0.066	0.307	3.90013e-18
Ecm1	1.46125e-22	2.85501	0.119	0.032	3.97548e-18
Swap70	1.49434e-22	1.57409	0.284	0.127	4.0655e-18
Isl1	1.59696e-22	-1.73187	0.066	0.305	4.34468e-18
Rab3il1	1.60573e-22	2.18972	0.122	0.032	4.36854e-18
Kcnab2	1.67867e-22	-1.36429	0.221	0.489	4.56699e-18
Tbc1d9	1.68525e-22	-1.71815	0.063	0.299	4.58489e-18
1700123O21Rik	1.75599e-22	3.1315	0.178	0.063	4.77735e-18
Unc13a	1.87203e-22	-1.62996	0.051	0.284	5.09303e-18
Ckb	2.0374e-22	-1.0709	0.19	0.473	5.54295e-18
Fsd1l	2.04687e-22	-1.47596	0.122	0.377	5.56871e-18
Map1a	2.12347e-22	-1.41846	0.386	0.656	5.7771e-18
Rasgef1a	2.1838e-22	-1.84112	0.071	0.309	5.94125e-18
Il15	2.46299e-22	1.66515	0.18	0.061	6.70082e-18
Ccdc85a	2.95245e-22	-1.8575	0.122	0.361	8.03242e-18
Prkca	3.24882e-22	0.451224	0.81	0.679	8.83873e-18
Arhgap10	3.43179e-22	1.16014	0.396	0.212	9.33654e-18
Pcdh17	3.56648e-22	-2.5816	0.051	0.274	9.70295e-18
Astn2	3.58431e-22	-1.58763	0.246	0.492	9.75148e-18
Mindy2	3.61103e-22	-1.07018	0.195	0.478	9.82417e-18
Dner	3.61324e-22	-2.26372	0.053	0.278	9.83019e-18
Zmat4	4.08379e-22	-2.4692	0.056	0.275	1.11104e-17
Sfxn2	4.10724e-22	2.31194	0.246	0.107	1.11742e-17
Nrg2	4.15858e-22	-2.63535	0.043	0.264	1.13138e-17
Caskin1	4.51412e-22	-1.41777	0.076	0.322	1.22811e-17
Ttc9	4.71787e-22	-1.47842	0.091	0.34	1.28354e-17
Son	5.15811e-22	0.501084	0.942	0.906	1.40331e-17
Dock1	5.16481e-22	0.931399	0.637	0.468	1.40514e-17
Ica1	5.16935e-22	-2.0393	0.051	0.277	1.40637e-17
Tcp11l1	5.54517e-22	-1.15147	0.223	0.492	1.50862e-17
Mgat3	5.59823e-22	-1.38364	0.142	0.401	1.52305e-17
Actr3b	6.62439e-22	-1.72976	0.033	0.251	1.80223e-17
Bicdl1	6.72689e-22	-2.3822	0.036	0.253	1.83012e-17
Xdh	6.91536e-22	1.75621	0.193	0.069	1.88139e-17
Igsf9b	7.05303e-22	-2.17772	0.036	0.255	1.91885e-17
Ehd3	7.50615e-22	-1.19098	0.086	0.336	2.04212e-17
Ahnak2	7.52669e-22	-1.44558	0.332	0.589	2.04771e-17
Astn1	7.67454e-22	-2.30257	0.041	0.26	2.08793e-17
Hecw2	8.53009e-22	-1.811	0.094	0.334	2.3207e-17
Dscam	9.33688e-22	-2.59461	0.069	0.291	2.54019e-17
Frmpd4	9.93009e-22	-3.24449	0.117	0.354	2.70158e-17
Syt7	9.94995e-22	-1.7815	0.14	0.382	2.70698e-17
Rnf157	1.02452e-21	-1.13855	0.17	0.433	2.7873e-17
Insc	1.07084e-21	-3.09131	0.036	0.246	2.91334e-17
Ptprr	1.09896e-21	-3.01701	0.051	0.267	2.98983e-17
Sh3bgrl2	1.24622e-21	-1.51929	0.084	0.324	3.39048e-17
C030017B01Rik	1.32798e-21	-1.96835	0.051	0.274	3.61289e-17
Spred2	1.37763e-21	1.42263	0.528	0.393	3.74797e-17
Rcn3	1.45455e-21	2.16972	0.142	0.043	3.95725e-17
Bace2	1.46579e-21	2.06869	0.256	0.115	3.98784e-17
C130071C03Rik	1.54643e-21	-3.1565	0.051	0.262	4.20722e-17
Gpr158	1.55172e-21	-2.68584	0.089	0.316	4.22162e-17
Tmeff2	1.57941e-21	-1.59178	0.16	0.4	4.29693e-17
Sorbs2	1.61643e-21	-1.96592	0.129	0.37	4.39766e-17
Acot11	1.6268e-21	1.93724	0.33	0.173	4.42586e-17
Cacna2d3	1.62699e-21	-2.29584	0.094	0.325	4.42638e-17
Abca2	1.66785e-21	-1.67253	0.061	0.291	4.53756e-17
Dgkh	1.87729e-21	-1.50743	0.472	0.661	5.10735e-17
Celf2	1.91226e-21	-1.02822	0.561	0.767	5.2025e-17
Trim30d	1.95323e-21	2.28677	0.147	0.046	5.31395e-17
Id4	2.25236e-21	-2.09314	0.058	0.283	6.12776e-17
Ndst3	2.416e-21	-2.90456	0.03	0.237	6.57298e-17
Cacnb3	2.4466e-21	-1.50832	0.089	0.328	6.65622e-17
Cntfr	2.52046e-21	-1.39403	0.099	0.342	6.85717e-17
Sqle	2.54893e-21	-1.28631	0.089	0.332	6.93462e-17
Cntnap5a	2.61955e-21	-2.63065	0.074	0.296	7.12675e-17
Gm44148	2.6416e-21	2.10574	0.251	0.111	7.18674e-17
Clip2	2.71058e-21	-1.1806	0.114	0.365	7.37439e-17
Erich3	2.75526e-21	-4.20447	0.005	0.197	7.49595e-17
Carmil3	3.03801e-21	-2.48286	0.051	0.268	8.26521e-17
Elapor2	3.0538e-21	-1.93147	0.063	0.286	8.30817e-17
Nav1	3.06502e-21	0.891559	0.728	0.547	8.33868e-17
Scn8a	3.07048e-21	-1.61519	0.147	0.392	8.35354e-17
Gm1604a	3.18174e-21	-2.62342	0.028	0.236	8.65623e-17
Oaf	3.32228e-21	1.77937	0.173	0.059	9.03859e-17
Grb14	3.33344e-21	-1.34004	0.178	0.429	9.06896e-17
Lrrn1	3.37589e-21	-1.73469	0.094	0.33	9.18445e-17
Dmtn	3.38467e-21	-1.71976	0.069	0.299	9.20833e-17
Lin7a	3.65741e-21	-2.52907	0.048	0.261	9.95035e-17
Gm2115	3.75131e-21	-2.69984	0.058	0.274	1.02058e-16
Cyp51	3.99614e-21	-1.69691	0.058	0.286	1.08719e-16
Tmod1	4.2423e-21	-1.53592	0.094	0.334	1.15416e-16
Dpp4	4.38619e-21	1.83521	0.107	0.027	1.19331e-16
Lrp1b	4.57773e-21	-2.55185	0.195	0.425	1.24542e-16
Adgrg6	5.0417e-21	-2.42397	0.086	0.304	1.37164e-16
Dhcr7	5.0871e-21	-2.65606	0.02	0.222	1.384e-16
Pbx3	5.29044e-21	-1.69746	0.119	0.36	1.43932e-16
Norad	5.54547e-21	-1.31894	0.234	0.49	1.5087e-16
Tnfrsf21	5.78268e-21	-1.63096	0.079	0.31	1.57324e-16
Lhfpl3	5.86285e-21	-2.00528	0.168	0.4	1.59505e-16
Mtmr7	5.88578e-21	-1.64288	0.043	0.26	1.60128e-16
Mapre2	6.06624e-21	-0.954311	0.376	0.642	1.65038e-16
Cend1	6.3534e-21	-1.61661	0.104	0.343	1.72851e-16
Pak3	6.52045e-21	-2.1106	0.058	0.277	1.77395e-16
Syngr1	6.92032e-21	-1.26219	0.109	0.356	1.88274e-16
Larp1b	7.32168e-21	-1.00993	0.074	0.308	1.99194e-16
Atp1a1	7.67635e-21	-1.17579	0.464	0.677	2.08843e-16
Mir124a-1hg	7.82313e-21	-2.41036	0.038	0.247	2.12836e-16
Itga6	8.65918e-21	-1.53282	0.099	0.336	2.35582e-16
Bicd2	8.86344e-21	-1.42805	0.066	0.295	2.41139e-16
Lgi1	8.93832e-21	-1.52783	0.099	0.337	2.43176e-16
Lrp11	9.00382e-21	-2.11683	0.058	0.277	2.44958e-16
Col4a5	1.02278e-20	2.27528	0.213	0.087	2.78257e-16
Slc13a4	1.09246e-20	2.87747	0.142	0.045	2.97214e-16
Map2	1.09343e-20	-1.27756	0.213	0.466	2.97477e-16
Grin1	1.11836e-20	-1.85921	0.051	0.268	3.04262e-16
N4bp2l1	1.16439e-20	-1.75466	0.043	0.259	3.16785e-16
Lin28b	1.19725e-20	-2.59122	0.023	0.224	3.25724e-16
Clvs1	1.29816e-20	-3.71608	0.015	0.209	3.53177e-16
Lrsam1	1.31189e-20	-1.18018	0.091	0.329	3.56912e-16
Pacsin1	1.33158e-20	-1.28937	0.165	0.421	3.62269e-16
Atrnl1	1.36359e-20	-1.48754	0.338	0.547	3.7098e-16
Col6a2	1.57116e-20	1.75694	0.193	0.072	4.27449e-16
Slc66a2	1.57712e-20	-1.62997	0.069	0.294	4.2907e-16
Coro2a	1.61292e-20	-1.70391	0.081	0.31	4.38811e-16
Parp8	1.68811e-20	1.32528	0.487	0.337	4.59268e-16
Slc7a14	1.72398e-20	-1.87478	0.069	0.29	4.69025e-16
Gas2l3	1.77031e-20	-3.16025	0.036	0.237	4.81631e-16
Dpysl3	1.83011e-20	-1.08756	0.343	0.591	4.97899e-16
Pcdhac2	1.8447e-20	-1.4116	0.15	0.393	5.01869e-16
Nfix	1.9004e-20	1.44115	0.343	0.181	5.17022e-16
Hoxb6	1.96744e-20	1.67249	0.32	0.163	5.35262e-16
Spock3	1.98035e-20	-2.06322	0.066	0.279	5.38775e-16
Crybg3	2.06554e-20	2.16981	0.279	0.136	5.61951e-16
Slc35f4	2.13104e-20	-2.43757	0.03	0.229	5.7977e-16
Rtn4rl1	2.34566e-20	-1.98717	0.058	0.275	6.38161e-16
Nipal3	2.38131e-20	-1.37948	0.165	0.412	6.4786e-16
Khdrbs2	2.38559e-20	-2.8189	0.046	0.252	6.49024e-16
Pag1	2.46506e-20	-1.20693	0.183	0.437	6.70643e-16
Gan	2.64082e-20	-1.34067	0.119	0.359	7.18463e-16
Rit2	2.73754e-20	-2.30361	0.048	0.258	7.44775e-16
Zic4	2.85757e-20	1.50574	0.152	0.049	7.77431e-16
Tspan15	2.97346e-20	-2.50839	0.033	0.234	8.0896e-16
Wdr47	2.99644e-20	-1.43562	0.074	0.301	8.15211e-16
Sptan1	3.0725e-20	-0.871654	0.495	0.699	8.35905e-16
Nalf1	3.09672e-20	-2.52063	0.104	0.322	8.42495e-16
Veph1	3.24105e-20	2.75403	0.188	0.073	8.81761e-16
Kcnq2	3.24355e-20	-2.28534	0.03	0.232	8.82439e-16
Adamts10	3.25159e-20	1.6325	0.33	0.174	8.84626e-16
Tspan7	3.30254e-20	-1.18792	0.175	0.425	8.9849e-16
Fads6	3.41489e-20	-2.69112	0.033	0.233	9.29054e-16
Plcxd3	3.48413e-20	-2.62982	0.056	0.263	9.47893e-16
Phlpp1	3.61184e-20	-1.27431	0.234	0.485	9.82637e-16
Hmbox1	3.69937e-20	-0.993921	0.287	0.54	1.00645e-15
Gm16083	3.7858e-20	-1.57479	0.089	0.316	1.02996e-15
Zfp804a	3.82188e-20	-2.87586	0.046	0.251	1.03978e-15
Entpd3	3.97685e-20	-1.75921	0.041	0.25	1.08194e-15
Prkar2b	4.0529e-20	-1.83217	0.112	0.339	1.10263e-15
Gria2	4.14838e-20	-2.58554	0.038	0.241	1.12861e-15
Atp2b1	4.29948e-20	-0.879125	0.434	0.665	1.16972e-15
Mdga2	4.32841e-20	-0.790826	0.345	0.596	1.17759e-15
Prkcz	4.47781e-20	-1.42902	0.066	0.286	1.21823e-15
Kif26b	4.49795e-20	-2.15845	0.069	0.284	1.22371e-15
Pirt	4.50917e-20	-1.45125	0.211	0.448	1.22676e-15
Mtss1	4.6995e-20	-1.01766	0.193	0.448	1.27855e-15
Gria3	4.75211e-20	1.03648	0.596	0.437	1.29286e-15
Mmp24	4.90629e-20	-2.69412	0.013	0.202	1.33481e-15
Hey2	4.95508e-20	-3.18832	0.033	0.229	1.34808e-15
Isl2	5.37443e-20	-1.51237	0.056	0.274	1.46217e-15
Phldb1	5.54536e-20	1.64139	0.421	0.267	1.50867e-15
Ryr2	5.574e-20	-2.78243	0.063	0.27	1.51646e-15
Pfkp	5.74192e-20	-1.16798	0.168	0.42	1.56215e-15
Mtus1	5.83035e-20	-1.32137	0.15	0.398	1.58621e-15
Prkce	5.97436e-20	-0.816966	0.602	0.788	1.62539e-15
Svip	6.42778e-20	-1.51085	0.056	0.271	1.74874e-15
Kcnd1	6.94517e-20	-1.83764	0.041	0.247	1.8895e-15
Cyp1b1	7.02042e-20	2.63707	0.16	0.056	1.90998e-15
Gm35501	7.15826e-20	-2.77074	0.015	0.203	1.94748e-15
Tmem150c	7.57491e-20	-2.32131	0.028	0.226	2.06083e-15
Gpc5	7.60728e-20	-3.00949	0.063	0.269	2.06964e-15
Pld5	7.84296e-20	-2.2311	0.071	0.281	2.13376e-15
Gpr156	8.99131e-20	-2.22384	0.023	0.217	2.44618e-15
Asic2	9.24396e-20	-2.20197	0.241	0.462	2.51491e-15
Pde1c	9.41981e-20	-2.43364	0.096	0.313	2.56275e-15
Sacs	9.4501e-20	-1.54432	0.104	0.334	2.57099e-15
Kctd1	9.84906e-20	-1.72789	0.132	0.361	2.67953e-15
Tbc1d30	9.85215e-20	-3.38216	0.015	0.201	2.68037e-15
Kansl1	9.87108e-20	0.679369	0.764	0.684	2.68553e-15
Ppfia2	1.02432e-19	-1.59145	0.142	0.368	2.78677e-15
Atp1a3	1.02513e-19	-1.66777	0.079	0.301	2.78898e-15
Nacad	1.03063e-19	-1.28526	0.084	0.311	2.80392e-15
Dop1b	1.08592e-19	-1.06508	0.152	0.397	2.95436e-15
Islr	1.11827e-19	1.41673	0.168	0.058	3.04238e-15
Tpd52	1.12188e-19	-0.991271	0.168	0.419	3.05217e-15
Mir100hg	1.12912e-19	0.52562	0.805	0.643	3.07188e-15
Cdh20	1.18748e-19	-2.75744	0.051	0.251	3.23066e-15
Brinp2	1.25054e-19	-3.00409	0.025	0.217	3.40222e-15
Marchf11	1.27187e-19	-2.42209	0.041	0.241	3.46024e-15
Eva1c	1.32369e-19	-1.66728	0.081	0.302	3.60122e-15
Patj	1.34554e-19	-1.36365	0.135	0.37	3.66067e-15
Kit	1.37064e-19	-2.24711	0.063	0.269	3.72895e-15
Slc6a17	1.38941e-19	-1.77971	0.048	0.256	3.78002e-15
Tro	1.39511e-19	-1.34918	0.071	0.291	3.79554e-15
Rap1gap2	1.43391e-19	-1.36297	0.135	0.371	3.90111e-15
Rnf150	1.48191e-19	-1.56597	0.063	0.277	4.03167e-15
Trim67	1.58045e-19	-2.44873	0.028	0.222	4.29978e-15
Unc13c	1.76157e-19	1.24652	0.444	0.274	4.79253e-15
Zswim5	1.7843e-19	-1.97149	0.041	0.242	4.85436e-15
Tspan13	2.05352e-19	-1.65396	0.063	0.278	5.5868e-15
Grm8	2.20838e-19	-3.10515	0.038	0.235	6.00813e-15
Jph4	2.36289e-19	-1.37122	0.109	0.34	6.42848e-15
1700025G04Rik	2.54985e-19	-1.21697	0.193	0.436	6.93713e-15
Nr6a1	2.69728e-19	-0.976084	0.299	0.555	7.33823e-15
Sipa1	2.69991e-19	1.89148	0.231	0.101	7.34537e-15
Lgr5	2.90431e-19	-3.08999	0.041	0.233	7.90145e-15
Scg5	2.97315e-19	-1.29325	0.084	0.307	8.08874e-15
Hip1	2.9968e-19	1.22152	0.622	0.524	8.1531e-15
Nova2	3.03453e-19	-2.49987	0.013	0.196	8.25575e-15
Diablo	3.19569e-19	-1.34631	0.074	0.293	8.6942e-15
Rnf180	3.225e-19	-2.16636	0.041	0.24	8.77393e-15
Cdh18	3.5254e-19	-2.52134	0.086	0.301	9.5912e-15
Pde11a	3.5389e-19	-2.4855	0.084	0.289	9.62793e-15
Anxa6	3.70473e-19	-0.963093	0.228	0.492	1.00791e-14
Rimkla	3.72129e-19	-2.18461	0.025	0.217	1.01241e-14
Fam20c	3.77772e-19	2.41358	0.294	0.158	1.02777e-14
Lingo2	3.88123e-19	-2.78869	0.203	0.418	1.05593e-14
Arl6ip1	4.03853e-19	-0.831168	0.183	0.437	1.09872e-14
Ywhag	4.10661e-19	-1.2009	0.439	0.655	1.11724e-14
Map7d1	4.34952e-19	-1.15926	0.173	0.414	1.18333e-14
Jakmip3	4.39532e-19	-2.51646	0.02	0.208	1.19579e-14
Gria4	4.66153e-19	-1.32263	0.188	0.423	1.26822e-14
Abcg1	4.74257e-19	-1.96201	0.069	0.277	1.29026e-14
Adamts5	4.83684e-19	-1.91334	0.109	0.326	1.31591e-14
Ank	4.91499e-19	1.15526	0.604	0.508	1.33717e-14
Pabpc1	4.94185e-19	1.16666	0.591	0.502	1.34448e-14
Slc36a1	5.15841e-19	-1.24757	0.142	0.379	1.4034e-14
Arhgef4	5.71905e-19	-2.9504	0.028	0.216	1.55592e-14
Tmem132e	6.19916e-19	-1.52801	0.056	0.264	1.68654e-14
Emb	6.47248e-19	-1.15439	0.122	0.357	1.7609e-14
Sorl1	6.47589e-19	-1.57078	0.18	0.411	1.76183e-14
Sybu	6.80629e-19	-1.16424	0.096	0.318	1.85172e-14
Pitpnm2	7.0532e-19	-1.34434	0.147	0.373	1.91889e-14
Shc4	7.23701e-19	-2.98505	0.038	0.228	1.9689e-14
Bend6	7.27889e-19	-1.56407	0.053	0.26	1.98029e-14
Fads2	7.31412e-19	-1.30821	0.175	0.414	1.98988e-14
Abca7	7.62388e-19	-1.40027	0.096	0.317	2.07415e-14
Dnm1l	7.77542e-19	-0.77102	0.287	0.549	2.11538e-14
Amer2	8.19095e-19	-1.77042	0.041	0.238	2.22843e-14
Lrp8	9.01366e-19	-1.84746	0.028	0.218	2.45226e-14
Cdk8	9.02925e-19	0.53644	0.843	0.782	2.4565e-14
Paqr8	9.24848e-19	-1.46533	0.081	0.296	2.51614e-14
Bcl2	9.3957e-19	0.915195	0.645	0.515	2.55619e-14
Arhgap28	9.56933e-19	-1.37724	0.165	0.394	2.60343e-14
Nol4	9.71323e-19	-2.83915	0.033	0.221	2.64258e-14
Mapk8ip2	1.01246e-18	-1.00555	0.142	0.387	2.75449e-14
Apc	1.01997e-18	-0.757851	0.393	0.629	2.77493e-14
Etnk2	1.02165e-18	2.83217	0.102	0.027	2.77949e-14
Mgp	1.03906e-18	0.898545	0.221	0.091	2.82686e-14
Ppfia4	1.07042e-18	-2.74672	0.015	0.194	2.91218e-14
Hsbp1l1	1.072e-18	-2.33472	0.038	0.23	2.9165e-14
Uck2	1.10161e-18	-1.63574	0.043	0.242	2.99704e-14
Kcnq5	1.12907e-18	-2.18543	0.084	0.291	3.07175e-14
Cep85l	1.18276e-18	-1.16449	0.195	0.441	3.21782e-14
Cd55	1.21494e-18	-1.42764	0.157	0.386	3.30536e-14
Tnk2	1.23841e-18	-1.18936	0.096	0.322	3.36921e-14
Ccdc141	1.24373e-18	-1.58737	0.112	0.329	3.38368e-14
Kpnb1	1.26059e-18	-1.30833	0.094	0.314	3.42957e-14
Rnf112	1.28989e-18	-2.26416	0.043	0.238	3.50927e-14
Slc17a6	1.31845e-18	-1.45086	0.079	0.29	3.58697e-14
Idi1	1.39112e-18	-1.28822	0.066	0.279	3.78468e-14
Arpp21	1.53552e-18	-3.46332	0.023	0.204	4.17754e-14
Snx7	1.60382e-18	-1.21634	0.17	0.409	4.36336e-14
Errfi1	1.67096e-18	2.73006	0.261	0.131	4.54602e-14
Rgs17	1.81302e-18	-1.71749	0.048	0.248	4.9325e-14
Pds5b	1.89048e-18	1.31781	0.543	0.433	5.14323e-14
Stac	1.90598e-18	-3.44742	0.028	0.21	5.18542e-14
Scn1a	1.96366e-18	-1.92419	0.099	0.307	5.34233e-14
Epha5	2.02541e-18	-2.38358	0.046	0.239	5.51034e-14
Spock2	2.1839e-18	-1.12443	0.348	0.575	5.94152e-14
Acot7	2.22365e-18	-0.944871	0.198	0.449	6.04967e-14
Mapre3	2.28088e-18	-0.853523	0.175	0.427	6.20536e-14
Sult4a1	2.28921e-18	-1.14982	0.198	0.443	6.22802e-14
Csdc2	2.321e-18	-2.03259	0.033	0.221	6.31451e-14
Mroh1	2.40448e-18	-1.56394	0.074	0.282	6.54164e-14
Ric3	2.46186e-18	-1.88645	0.033	0.223	6.69773e-14
Epb41l4b	2.48183e-18	-1.16181	0.162	0.397	6.75206e-14
Lpin1	2.53911e-18	-1.32	0.122	0.349	6.9079e-14
Fbln5	2.69661e-18	-2.43059	0.063	0.256	7.33639e-14
Col9a2	2.96717e-18	2.46945	0.114	0.034	8.07247e-14
Alcam	2.98416e-18	-1.12876	0.272	0.511	8.1187e-14
Dennd4a	3.06566e-18	-1.03954	0.16	0.399	8.34044e-14
Pcyt2	3.1919e-18	-1.00438	0.119	0.352	8.6839e-14
Hdac9	3.21243e-18	-1.75632	0.206	0.418	8.73973e-14
Tspyl4	3.27196e-18	-1.41513	0.124	0.346	8.90171e-14
Wipf3	3.4681e-18	-1.76203	0.081	0.288	9.43532e-14
Plcb4	3.63088e-18	0.947369	0.645	0.546	9.87819e-14
Pakap	3.68191e-18	-1.79317	0.086	0.291	1.0017e-13
Cerk	3.68402e-18	-1.11371	0.14	0.374	1.00228e-13
Ablim3	3.83047e-18	-1.68533	0.046	0.241	1.04212e-13
Synpr	3.85091e-18	-2.0673	0.094	0.298	1.04768e-13
Epb41l4a	3.86706e-18	-2.14429	0.048	0.239	1.05207e-13
Arfgef3	3.9967e-18	-1.13436	0.183	0.409	1.08734e-13
Slit1	4.06045e-18	-2.35769	0.028	0.21	1.10469e-13
Usp20	4.10469e-18	-1.2398	0.102	0.319	1.11672e-13
Etnk1	4.21584e-18	-0.620903	0.355	0.628	1.14696e-13
Prkab2	4.26773e-18	-1.22164	0.107	0.328	1.16108e-13
Ptprj	4.67388e-18	-1.68545	0.165	0.385	1.27158e-13
Hk1	4.84751e-18	-0.883791	0.178	0.427	1.31881e-13
Vstm5	4.88087e-18	-2.08387	0.038	0.226	1.32789e-13
Nap1l5	4.8948e-18	-1.17825	0.117	0.345	1.33168e-13
Gm48765	4.93847e-18	-1.2174	0.188	0.423	1.34356e-13
Fgfr2	5.17525e-18	1.31394	0.543	0.453	1.40798e-13
Tmem25	5.22416e-18	-1.99022	0.028	0.211	1.42128e-13
Cyth3	5.48767e-18	1.53442	0.497	0.382	1.49298e-13
Abhd12	5.82413e-18	-1.16603	0.168	0.405	1.58451e-13
Rph3a	6.03019e-18	-1.27584	0.16	0.388	1.64057e-13
Irak3	6.0575e-18	2.18385	0.203	0.087	1.648e-13
Lss	6.2979e-18	-2.09245	0.046	0.237	1.71341e-13
Bcl7a	6.84175e-18	-2.48268	0.041	0.226	1.86137e-13
Nat8l	6.94913e-18	-1.21878	0.122	0.348	1.89058e-13
Dctn1	7.18406e-18	-1.19355	0.132	0.359	1.95449e-13
Fasn	7.45701e-18	-1.2452	0.119	0.341	2.02875e-13
Papss2	7.46014e-18	2.55517	0.124	0.039	2.02961e-13
Pcbp4	7.47509e-18	-0.739289	0.198	0.453	2.03367e-13
Gm1043	7.59024e-18	-1.84756	0.051	0.245	2.065e-13
Lzts1	7.72735e-18	-2.8823	0.018	0.192	2.1023e-13
Dtx4	7.75609e-18	2.04229	0.284	0.149	2.11012e-13
Pcdh1	7.80351e-18	-2.61494	0.02	0.195	2.12302e-13
Cbarp	8.3803e-18	-1.6361	0.046	0.237	2.27995e-13
Garnl3	8.51927e-18	-1.20156	0.228	0.452	2.31775e-13
Fbxo9	8.66398e-18	-1.24987	0.089	0.302	2.35712e-13
Myh14	8.8884e-18	-1.91004	0.056	0.249	2.41818e-13
Fzd3	9.2579e-18	-1.42899	0.091	0.302	2.5187e-13
Gpr137b	9.26058e-18	-1.62891	0.071	0.272	2.51943e-13
Miga1	9.68756e-18	-1.07395	0.094	0.313	2.6356e-13
Tmtc1	9.69117e-18	-1.14629	0.234	0.469	2.63658e-13
Nyap1	9.72763e-18	-1.56632	0.058	0.255	2.6465e-13
Osbpl10	1.02963e-17	-1.59429	0.086	0.291	2.80122e-13
Mapk11	1.07977e-17	-1.88788	0.033	0.217	2.93761e-13
Anxa2	1.17288e-17	-0.761572	0.429	0.668	3.19094e-13
Kmt5a	1.24903e-17	-1.11884	0.117	0.34	3.39811e-13
Slc16a7	1.2968e-17	-1.77965	0.071	0.271	3.52808e-13
Cic	1.3318e-17	-1.21954	0.081	0.289	3.62329e-13
Nrn1	1.3395e-17	-1.18555	0.16	0.391	3.64424e-13
Jph3	1.3872e-17	-1.28003	0.061	0.259	3.77402e-13
Slc22a23	1.44392e-17	-1.72397	0.071	0.268	3.92834e-13
Sgsm1	1.4958e-17	-1.62359	0.02	0.196	4.06948e-13
Efna5	1.51607e-17	1.3554	0.533	0.392	4.12462e-13
Atp2b2	1.5683e-17	-1.76953	0.104	0.309	4.26671e-13
Ttbk1	1.58643e-17	-1.56243	0.041	0.229	4.31605e-13
Mfsd6	1.59271e-17	-0.95489	0.142	0.37	4.33311e-13
A330102I10Rik	1.60964e-17	-2.42929	0.036	0.216	4.37918e-13
Acat2	1.63096e-17	-1.40581	0.056	0.253	4.43718e-13
Syt14	1.65325e-17	-1.77238	0.028	0.206	4.49783e-13
Grin3a	1.72282e-17	-3.33382	0.023	0.194	4.68711e-13
Vstm2l	1.77009e-17	-1.70079	0.048	0.237	4.8157e-13
Srrm4	1.79463e-17	-2.7955	0.025	0.2	4.88246e-13
Zfp385b	1.81377e-17	-1.62334	0.124	0.334	4.93454e-13
Ppargc1a	1.82783e-17	-0.867991	0.124	0.348	4.9728e-13
Susd2	1.89076e-17	-1.65505	0.056	0.249	5.14401e-13
Ppef1	1.93503e-17	-1.90101	0.056	0.247	5.26444e-13
Tubb3	1.97092e-17	-0.936024	0.421	0.655	5.3621e-13
Dmxl2	1.99006e-17	-1.02393	0.218	0.451	5.41415e-13
Lbp	1.99214e-17	1.28545	0.165	0.06	5.41983e-13
Mndal	2.00508e-17	0.893676	0.216	0.09	5.45501e-13
Ccnd2	2.08553e-17	1.87837	0.17	0.065	5.6739e-13
Plxdc2	2.09332e-17	0.780871	0.657	0.508	5.69509e-13
Wdr17	2.12546e-17	-1.69705	0.038	0.223	5.78253e-13
Strbp	2.2602e-17	-0.885728	0.246	0.488	6.1491e-13
Foxc1	2.43237e-17	1.75713	0.122	0.038	6.61751e-13
Enpp2	2.49627e-17	1.84425	0.442	0.321	6.79134e-13
Immt	2.54599e-17	-0.838173	0.165	0.401	6.92662e-13
Eml5	2.74079e-17	-1.45925	0.058	0.254	7.4566e-13
Sh3tc2	2.82466e-17	-4.01352	0.018	0.183	7.68476e-13
Fgf14	2.84822e-17	2.29842	0.345	0.213	7.74888e-13
Rapgef4	2.86176e-17	-1.27601	0.165	0.386	7.78569e-13
Nrip3	2.99768e-17	-1.5882	0.066	0.264	8.1555e-13
Kbtbd11	3.06336e-17	-2.64622	0.02	0.191	8.33419e-13
Fam171b	3.09844e-17	-0.934467	0.135	0.363	8.42962e-13
Celsr2	3.14308e-17	-2.03058	0.033	0.212	8.55106e-13
Stac2	3.31337e-17	-2.01196	0.036	0.216	9.01435e-13
Rgs4	3.33137e-17	-1.38682	0.239	0.465	9.06333e-13
Klhl32	3.35476e-17	-1.564	0.043	0.231	9.12696e-13
Slc43a2	3.36899e-17	-0.964677	0.129	0.353	9.16568e-13
Vamp1	3.39374e-17	-1.02311	0.122	0.344	9.233e-13
Efr3b	3.56361e-17	-1.48465	0.102	0.31	9.69516e-13
Sptb	3.5816e-17	-2.90752	0.025	0.197	9.74409e-13
Septin11	3.68709e-17	1.36184	0.51	0.408	1.00311e-12
Eef1a2	3.69744e-17	-1.07315	0.173	0.406	1.00593e-12
Dpysl2	3.75497e-17	-0.802645	0.429	0.633	1.02158e-12
Pde2a	3.94517e-17	-1.53707	0.061	0.254	1.07332e-12
Clgn	4.02096e-17	-1.22807	0.096	0.307	1.09394e-12
Tenm1	4.10581e-17	-1.72379	0.063	0.25	1.11703e-12
Apba2	4.16105e-17	-1.60324	0.038	0.22	1.13205e-12
Dlgap3	4.30264e-17	-1.608	0.036	0.217	1.17058e-12
Opcml	4.36133e-17	0.964117	0.553	0.413	1.18654e-12
Mboat2	4.40022e-17	-1.39646	0.272	0.486	1.19712e-12
Ablim2	4.44813e-17	-1.77114	0.038	0.22	1.21016e-12
Kcnip1	4.48108e-17	-1.84167	0.211	0.424	1.21912e-12
Ncdn	4.94056e-17	-1.08622	0.168	0.397	1.34413e-12
Galnt18	4.94705e-17	-0.916592	0.201	0.437	1.34589e-12
Scn4b	5.15586e-17	-2.08404	0.048	0.232	1.4027e-12
Cmtm7	5.22222e-17	2.00507	0.168	0.065	1.42076e-12
Arhgef26	5.38297e-17	-2.88231	0.033	0.204	1.46449e-12
Serpinh1	5.49432e-17	1.8614	0.198	0.084	1.49478e-12
Slc45a4	5.51639e-17	-1.45633	0.071	0.269	1.50079e-12
Klf8	5.76305e-17	-1.81382	0.03	0.206	1.56789e-12
Rab15	5.836e-17	-1.53553	0.058	0.249	1.58774e-12
Gfra1	5.84697e-17	0.664462	0.475	0.319	1.59073e-12
Plekhm3	5.94588e-17	-0.923864	0.216	0.453	1.61764e-12
Uhmk1	6.03334e-17	-0.993199	0.147	0.372	1.64143e-12
Ctnnbip1	6.36172e-17	-1.3386	0.074	0.271	1.73077e-12
Acsl6	6.46287e-17	-1.28624	0.074	0.272	1.75829e-12
Diaph3	6.53617e-17	-2.51443	0.048	0.229	1.77823e-12
Daam1	6.73033e-17	-0.914036	0.193	0.43	1.83105e-12
Ttll5	6.77053e-17	-1.0957	0.175	0.402	1.84199e-12
Synj2	6.845e-17	2.18378	0.294	0.165	1.86225e-12
Erbb3	6.85225e-17	-2.78999	0.051	0.226	1.86422e-12
Ankrd13d	7.26957e-17	-1.35699	0.053	0.242	1.97776e-12
Plekhb2	7.53968e-17	-1.15375	0.086	0.292	2.05125e-12
Madd	7.57202e-17	-1.24099	0.086	0.292	2.06004e-12
Calm1	7.91071e-17	-0.929761	0.662	0.836	2.15219e-12
Limk2	8.00441e-17	-0.830257	0.132	0.361	2.17768e-12
Trpv2	8.10439e-17	-1.25599	0.046	0.231	2.20488e-12
Sema4b	8.70539e-17	-1.20443	0.117	0.327	2.36839e-12
Zfyve28	8.79104e-17	-1.07042	0.147	0.368	2.39169e-12
Cald1	8.81513e-17	0.813818	0.497	0.323	2.39825e-12
Coro1a	9.08655e-17	-1.54642	0.071	0.267	2.47209e-12
Sik2	9.2103e-17	1.31562	0.383	0.234	2.50576e-12
Ywhah	9.35742e-17	-0.895082	0.368	0.615	2.54578e-12
Lrrtm3	9.70931e-17	-2.69802	0.023	0.188	2.64152e-12
Sod2	9.74971e-17	-1.16619	0.124	0.339	2.65251e-12
Lrrc8b	9.79392e-17	-1.65696	0.063	0.253	2.66453e-12
Ackr1	9.84778e-17	-1.3085	0.071	0.267	2.67919e-12
Camk2g	1.03324e-16	-0.826338	0.34	0.583	2.81103e-12
Kcnmb4	1.054e-16	-3.11544	0.018	0.181	2.86752e-12
Dgkg	1.07359e-16	-1.9795	0.063	0.248	2.92081e-12
Fam126a	1.11101e-16	-1.17499	0.165	0.387	3.0226e-12
Nuak1	1.15031e-16	-1.10645	0.109	0.316	3.12953e-12
Arhgap44	1.17933e-16	-1.12062	0.099	0.305	3.2085e-12
Ehd4	1.20541e-16	-1.62748	0.063	0.253	3.27945e-12
Impdh1	1.26227e-16	-1.77403	0.053	0.238	3.43414e-12
Cda	1.26302e-16	-1.31805	0.056	0.243	3.43617e-12
Klc2	1.30709e-16	-1.2822	0.117	0.326	3.55606e-12
Slc7a2	1.35081e-16	-1.80701	0.119	0.316	3.67501e-12
Chd5	1.36916e-16	-2.49136	0.028	0.197	3.72494e-12
Zmynd8	1.37155e-16	-0.832163	0.327	0.569	3.73144e-12
Kcnj3	1.44045e-16	-3.2059	0.013	0.172	3.91889e-12
Epas1	1.4563e-16	-1.81863	0.089	0.282	3.96201e-12
Gclm	1.51051e-16	-0.798706	0.228	0.476	4.10949e-12
Cpne2	1.53538e-16	-1.18167	0.084	0.281	4.17716e-12
Tmem131l	1.57572e-16	-1.53238	0.107	0.308	4.28692e-12
Palld	1.59143e-16	-1.80162	0.066	0.253	4.32964e-12
Gm43376	1.65112e-16	-3.63427	0.013	0.171	4.49204e-12
Parvb	1.71333e-16	-1.26366	0.069	0.262	4.66129e-12
Prima1	1.82826e-16	-3.7805	0.018	0.177	4.97396e-12
Pstpip2	1.92994e-16	-3.15164	0.018	0.178	5.25059e-12
Zhx3	1.97205e-16	1.97885	0.348	0.222	5.36516e-12
Insig1	2.0901e-16	-1.26476	0.066	0.258	5.68632e-12
Rassf5	2.1163e-16	-1.25857	0.041	0.218	5.75761e-12
Cacna1e	2.29586e-16	1.68727	0.216	0.099	6.24611e-12
Adam10	2.32577e-16	-1.01145	0.239	0.477	6.32748e-12
P4ha3	2.37672e-16	-2.41199	0.015	0.176	6.4661e-12
Gdpd1	2.41334e-16	-1.31855	0.043	0.223	6.56574e-12
Sema4d	2.46862e-16	-0.973359	0.074	0.269	6.71614e-12
Malt1	2.57069e-16	1.82526	0.294	0.165	6.99383e-12
Mbp	2.89765e-16	-1.11331	0.274	0.517	7.88334e-12
Mdfic2	2.90226e-16	-1.99303	0.107	0.297	7.89589e-12
Dync1h1	3.06179e-16	-0.809435	0.459	0.673	8.3299e-12
Uhrf1bp1l	3.11238e-16	-0.877883	0.216	0.44	8.46754e-12
Gabarapl1	3.26027e-16	-0.961027	0.221	0.453	8.86989e-12
Slc1a4	3.27087e-16	-1.81492	0.051	0.231	8.89872e-12
Gsdmd	3.30916e-16	1.63816	0.104	0.031	9.0029e-12
Atp1b1	3.33839e-16	-0.978595	0.34	0.585	9.08241e-12
Ano3	3.45045e-16	-1.55604	0.218	0.43	9.3873e-12
Gpd2	3.45485e-16	-1.08617	0.129	0.342	9.39927e-12
Septin9	3.55773e-16	1.63565	0.332	0.195	9.67916e-12
Slfn5	3.63403e-16	1.62764	0.132	0.045	9.88674e-12
Cluh	3.64733e-16	-1.00303	0.074	0.27	9.92293e-12
Cxxc4	3.71834e-16	-2.00092	0.028	0.195	1.01161e-11
Slc24a3	3.76094e-16	1.10715	0.551	0.421	1.0232e-11
Tecpr1	4.08979e-16	-0.80787	0.15	0.372	1.11267e-11
Abca3	4.14593e-16	-0.90089	0.122	0.334	1.12794e-11
Cipc	4.22572e-16	-1.01364	0.099	0.302	1.14965e-11
Cnst	4.29028e-16	-1.13535	0.119	0.33	1.16721e-11
Camsap2	4.37857e-16	-0.840235	0.193	0.423	1.19123e-11
Atp6v1b2	4.4819e-16	-0.857	0.211	0.447	1.21935e-11
Arhgap21	4.49825e-16	1.26404	0.515	0.405	1.22379e-11
Napb	4.58464e-16	-1.04898	0.256	0.476	1.2473e-11
Fbxo41	4.60381e-16	-2.32006	0.015	0.172	1.25251e-11
Phldb2	4.8078e-16	1.08774	0.442	0.296	1.30801e-11
Mark1	4.8335e-16	-1.60425	0.051	0.231	1.315e-11
Klhl3	4.94061e-16	-1.41124	0.038	0.212	1.34414e-11
Eno1	5.00012e-16	-0.854587	0.14	0.357	1.36033e-11
Myo5a	5.02914e-16	-1.08764	0.33	0.539	1.36823e-11
Ube2o	5.03666e-16	-0.916128	0.173	0.395	1.37027e-11
Prrxl1	5.19021e-16	-1.04371	0.091	0.292	1.41205e-11
Mdfic	5.2121e-16	1.24473	0.287	0.148	1.418e-11
Camk2a	5.55245e-16	-1.59049	0.102	0.294	1.5106e-11
Iqsec3	5.5785e-16	-1.9207	0.013	0.168	1.51769e-11
Chd2	5.60305e-16	0.939782	0.612	0.522	1.52437e-11
Rundc3b	5.68252e-16	-1.45213	0.038	0.211	1.54599e-11
Nwd2	5.77601e-16	-1.1602	0.112	0.311	1.57142e-11
Mgat4a	5.86633e-16	-1.32269	0.069	0.256	1.596e-11
Mlxip	6.04227e-16	-1.54029	0.071	0.259	1.64386e-11
Gsr	6.1217e-16	-0.67278	0.099	0.301	1.66547e-11
Grik5	6.18945e-16	-0.915229	0.102	0.308	1.6839e-11
Pros1	6.62178e-16	1.86146	0.239	0.118	1.80152e-11
Camk4	7.37261e-16	-2.64409	0.02	0.179	2.00579e-11
Zfp536	7.75665e-16	-1.24471	0.244	0.45	2.11027e-11
Ampd3	7.98549e-16	-1.13277	0.137	0.347	2.17253e-11
Endod1	8.07312e-16	-1.23128	0.16	0.372	2.19637e-11
Abr	8.16723e-16	-0.816459	0.226	0.46	2.22198e-11
Kng2	8.25001e-16	3.16343	0.107	0.033	2.2445e-11
Nsg2	8.49618e-16	-1.33185	0.053	0.233	2.31147e-11
Tmem169	8.50387e-16	-3.13997	0.01	0.161	2.31356e-11
Actb	8.57687e-16	-0.702534	0.546	0.76	2.33342e-11
Nwd1	8.81247e-16	-3.18427	0.023	0.179	2.39752e-11
Srsf11	8.8186e-16	0.976776	0.65	0.6	2.39919e-11
Acly	8.88435e-16	-0.842243	0.193	0.426	2.41708e-11
9430041J12Rik	9.39091e-16	-3.1255	0.025	0.183	2.55489e-11
Kank1	9.76281e-16	-1.08419	0.203	0.422	2.65607e-11
Slc45a1	9.88168e-16	-2.27515	0.023	0.183	2.68841e-11
Cdkl2	9.96521e-16	-0.82041	0.089	0.29	2.71113e-11
Chka	1.01128e-15	-0.587777	0.221	0.46	2.75128e-11
Gnai1	1.01593e-15	-1.123	0.086	0.281	2.76395e-11
Stxbp5l	1.02175e-15	-2.83093	0.036	0.199	2.77978e-11
Luc7l2	1.06806e-15	0.60129	0.805	0.757	2.90575e-11
Mkx	1.06838e-15	-3.07509	0.018	0.172	2.90662e-11
Lrrc58	1.06994e-15	-0.920536	0.19	0.413	2.91087e-11
Tmem184c	1.08809e-15	-1.23436	0.096	0.295	2.96025e-11
Gm16201	1.11628e-15	2.73556	0.137	0.05	3.03695e-11
Ttl	1.11744e-15	-1.19371	0.17	0.381	3.04012e-11
Rab37	1.14487e-15	-2.1749	0.028	0.189	3.11474e-11
Dhx32	1.17589e-15	-1.36854	0.046	0.222	3.19913e-11
Adgrl2	1.1877e-15	-1.76428	0.074	0.255	3.23125e-11
Pcsk1n	1.28004e-15	-0.728025	0.175	0.405	3.48248e-11
Usp31	1.28514e-15	-1.01872	0.114	0.316	3.49636e-11
Gars	1.28757e-15	-0.902607	0.145	0.361	3.50295e-11
Lmtk3	1.3425e-15	-4.14278	0.003	0.146	3.65241e-11
Plekhd1	1.41245e-15	-2.26768	0.025	0.185	3.8427e-11
Cers6	1.51321e-15	1.3094	0.345	0.21	4.11685e-11
Kcnq3	1.55265e-15	-2.68371	0.041	0.205	4.22413e-11
Eno1b	1.6569e-15	-1.1618	0.079	0.269	4.50775e-11
Tns2	1.66822e-15	1.88808	0.274	0.15	4.53857e-11
Eif2ak3	1.67612e-15	1.59902	0.386	0.263	4.56005e-11
Sez6l2	1.72415e-15	-1.33164	0.063	0.246	4.69073e-11
Gabrg2	1.74796e-15	-1.97543	0.033	0.197	4.7555e-11
Tubb2a	1.78082e-15	-1.04142	0.241	0.462	4.84489e-11
Zfp40	1.82268e-15	-1.21665	0.089	0.278	4.95877e-11
Sik3	1.82468e-15	0.757473	0.584	0.439	4.96422e-11
Zfp950	1.88447e-15	1.29484	0.51	0.415	5.1269e-11
Ppp2r5b	1.98176e-15	-0.907535	0.129	0.345	5.39158e-11
Xkr4	1.9907e-15	-0.997214	0.175	0.388	5.4159e-11
Celsr3	2.02296e-15	-3.9077	0.01	0.157	5.50367e-11
Tafa2	2.02461e-15	-2.87879	0.048	0.216	5.50814e-11
Dip2b	2.06812e-15	-0.762647	0.376	0.618	5.62654e-11
Cmtm5	2.07235e-15	-2.81348	0.033	0.191	5.63804e-11
Magi3	2.18079e-15	0.698093	0.688	0.582	5.93305e-11
Atp6v1a	2.26001e-15	-0.840795	0.338	0.567	6.14858e-11
Tmem63c	2.30646e-15	-1.46184	0.043	0.213	6.27496e-11
Sh3glb2	2.35717e-15	-0.690156	0.124	0.333	6.41293e-11
Lactb2	2.36548e-15	-1.20243	0.084	0.273	6.43553e-11
Hsd17b7	2.4513e-15	-1.86007	0.033	0.196	6.66899e-11
Nars	2.49305e-15	-0.760174	0.254	0.499	6.78259e-11
Baz2b	2.49503e-15	0.607332	0.746	0.703	6.78798e-11
Parp3	2.50565e-15	1.35868	0.307	0.171	6.81688e-11
Agtr1a	2.53119e-15	1.98569	0.18	0.078	6.88637e-11
Sptbn2	2.56035e-15	-1.17885	0.046	0.218	6.96569e-11
Syp	2.56331e-15	-1.02983	0.112	0.313	6.97373e-11
Ptprn	2.61648e-15	-1.60133	0.089	0.275	7.1184e-11
Fhdc1	2.66729e-15	-3.17919	0.023	0.176	7.25664e-11
Scamp5	2.70574e-15	-1.07209	0.099	0.295	7.36124e-11
Adgrb1	2.72301e-15	-2.65006	0.018	0.17	7.40822e-11
Srxn1	2.72365e-15	-1.478	0.074	0.256	7.40997e-11
Rab27b	2.7474e-15	-1.73326	0.056	0.227	7.47458e-11
Inpp4a	2.75149e-15	-0.826485	0.168	0.387	7.48572e-11
Prkar1a	2.75581e-15	-0.82857	0.266	0.502	7.49747e-11
Clcn6	2.78674e-15	-1.17244	0.081	0.269	7.58159e-11
Kazn	2.80423e-15	-0.987648	0.145	0.356	7.62919e-11
Cds1	2.80994e-15	-1.56251	0.041	0.209	7.64473e-11
Olfml3	2.84964e-15	2.42991	0.145	0.056	7.75272e-11
Myo10	2.88814e-15	-1.08912	0.185	0.398	7.85747e-11
Cat	2.89465e-15	-0.780941	0.099	0.296	7.87519e-11
Atp6v0e2	2.94818e-15	-0.925306	0.096	0.294	8.0208e-11
Mgll	2.96822e-15	-0.940147	0.162	0.379	8.07535e-11
Chl1	2.98132e-15	-1.02324	0.185	0.395	8.11099e-11
Rasa1	3.00335e-15	-0.769197	0.216	0.447	8.17092e-11
Phc2	3.12493e-15	1.25169	0.546	0.463	8.5017e-11
Zdhhc21	3.12626e-15	-0.689165	0.206	0.429	8.5053e-11
Vezt	3.23879e-15	-0.879785	0.244	0.465	8.81144e-11
Gm40841	3.36954e-15	-2.14832	0.023	0.178	9.16717e-11
Cacna2d2	3.44974e-15	-2.16315	0.033	0.193	9.38536e-11
Gpc1	3.57567e-15	-1.44122	0.076	0.259	9.72797e-11
Mmd2	3.61372e-15	-1.8026	0.102	0.282	9.83149e-11
Vwa5b2	3.67195e-15	-1.89902	0.02	0.174	9.9899e-11
Jhy	3.78543e-15	-2.61908	0.018	0.168	1.02987e-10
Tut4	3.88326e-15	1.05019	0.525	0.42	1.05648e-10
Phf24	3.97815e-15	-1.35748	0.368	0.541	1.0823e-10
Piezo1	4.06661e-15	1.66409	0.168	0.068	1.10636e-10
Calm3	4.07316e-15	-0.970508	0.254	0.479	1.10814e-10
Vps33a	4.16138e-15	-1.26917	0.071	0.254	1.13215e-10
Ece2	4.18146e-15	-1.33598	0.069	0.249	1.13761e-10
Dpf3	4.2188e-15	-2.11578	0.03	0.189	1.14777e-10
Mfhas1	4.23589e-15	-0.949914	0.162	0.374	1.15242e-10
Shisa3	4.24027e-15	2.06949	0.14	0.052	1.15361e-10
Ntn1	4.28899e-15	1.14878	0.218	0.099	1.16686e-10
Iqgap2	4.29195e-15	-1.69857	0.104	0.288	1.16767e-10
Atcay	4.4649e-15	-1.01968	0.069	0.251	1.21472e-10
Myh10	4.58807e-15	-1.45048	0.107	0.296	1.24823e-10
Tfrc	4.60267e-15	-1.19923	0.046	0.214	1.2522e-10
Slc4a10	4.61315e-15	-3.64296	0.03	0.188	1.25505e-10
Gm10863	4.62253e-15	-2.76857	0.046	0.205	1.25761e-10
Hspb8	4.72914e-15	-0.996614	0.107	0.302	1.28661e-10
Plekha7	4.75066e-15	-2.10784	0.061	0.23	1.29246e-10
Myt1	4.79991e-15	-1.38948	0.038	0.201	1.30586e-10
Ret	4.81319e-15	-1.19152	0.142	0.345	1.30948e-10
Macir	4.82759e-15	-1.79697	0.025	0.182	1.3134e-10
Mtpn	4.89381e-15	-0.936384	0.15	0.36	1.33141e-10
Nceh1	5.14843e-15	-0.843946	0.094	0.288	1.40068e-10
Dusp3	5.37491e-15	-1.09949	0.114	0.309	1.4623e-10
Dok4	5.60162e-15	-0.928653	0.15	0.366	1.52398e-10
Fras1	5.66408e-15	-2.23473	0.051	0.214	1.54097e-10
Prdm12	5.70551e-15	-1.06399	0.086	0.275	1.55224e-10
Srebf2	5.78132e-15	-0.681538	0.236	0.477	1.57287e-10
Pebp1	5.79551e-15	-1.09959	0.135	0.338	1.57673e-10
Nudt3	5.91748e-15	-0.9693	0.165	0.377	1.60991e-10
Slitrk3	5.93479e-15	-1.83777	0.033	0.193	1.61462e-10
Usp13	6.07813e-15	-0.881873	0.132	0.337	1.65362e-10
Jag2	6.09037e-15	-3.42563	0.01	0.153	1.65694e-10
Capn5	6.18995e-15	-1.29079	0.084	0.269	1.68404e-10
Klc1	6.24746e-15	-0.64349	0.51	0.709	1.69968e-10
Kras	6.5976e-15	-0.679729	0.162	0.382	1.79494e-10
Marchf4	7.07428e-15	-3.4821	0.013	0.157	1.92463e-10
Scrn1	7.32242e-15	-1.1873	0.094	0.283	1.99214e-10
Slit2	7.35807e-15	-2.4602	0.063	0.229	2.00184e-10
Cys1	7.45323e-15	2.05329	0.15	0.058	2.02773e-10
Map7d2	7.54755e-15	-1.21207	0.332	0.553	2.05339e-10
Sars	7.80852e-15	-0.831888	0.165	0.386	2.12439e-10
Reep2	8.06169e-15	-1.08917	0.084	0.268	2.19326e-10
Ap1ar	8.19616e-15	-0.867385	0.14	0.347	2.22985e-10
Snhg18	8.21992e-15	1.64718	0.165	0.067	2.23631e-10
Fmnl1	8.22014e-15	-1.69901	0.03	0.188	2.23637e-10
Myo16	8.32996e-15	-2.03411	0.074	0.244	2.26625e-10
Tmem63b	8.58247e-15	-0.693975	0.206	0.431	2.33495e-10
6330411D24Rik	8.60234e-15	-2.30851	0.043	0.205	2.34035e-10
Dusp8	9.15121e-15	-1.80288	0.03	0.187	2.48968e-10
Cd24a	9.42332e-15	-1.12948	0.173	0.382	2.56371e-10
Sh2d4b	9.49686e-15	-2.98174	0.018	0.164	2.58372e-10
Pnma2	1.00611e-14	-1.47725	0.051	0.218	2.73722e-10
Lrrc75b	1.02577e-14	-1.49092	0.046	0.211	2.7907e-10
Eef2	1.05378e-14	-0.802778	0.289	0.524	2.86692e-10
Oip5os1	1.06698e-14	-0.750927	0.17	0.388	2.90284e-10
Pgap1	1.113e-14	-1.49888	0.048	0.214	3.02802e-10
B4galt5	1.12636e-14	-1.05961	0.107	0.298	3.06437e-10
Nol4l	1.16082e-14	-1.04574	0.124	0.321	3.15812e-10
Tlcd3b	1.16241e-14	-0.908698	0.074	0.258	3.16244e-10
Prnp	1.16282e-14	-0.861995	0.206	0.427	3.16357e-10
Camk2b	1.16992e-14	-1.19319	0.038	0.199	3.18289e-10
Rundc3a	1.20105e-14	-0.714302	0.112	0.315	3.26757e-10
Fam169a	1.23484e-14	-2.32331	0.015	0.161	3.35952e-10
Gk	1.26581e-14	-1.2379	0.066	0.242	3.44377e-10
Dynll2	1.329e-14	-0.851119	0.269	0.498	3.61569e-10
9530077C05Rik	1.37401e-14	-1.01465	0.053	0.223	3.73812e-10
Acss1	1.40891e-14	-1.89696	0.079	0.249	3.83308e-10
Atp13a2	1.42908e-14	-1.04503	0.107	0.299	3.88797e-10
Slc8a3	1.47274e-14	-2.12006	0.023	0.172	4.00674e-10
Atp2b3	1.48466e-14	-2.33373	0.018	0.163	4.03915e-10
Tcerg1l	1.49194e-14	-1.80106	0.041	0.201	4.05898e-10
Slc25a5	1.49913e-14	-1.39207	0.079	0.256	4.07854e-10
Irgq	1.50997e-14	-1.1791	0.053	0.222	4.10802e-10
Hs6st2	1.54581e-14	-1.35478	0.084	0.257	4.20554e-10
Eipr1	1.58561e-14	-1.25951	0.056	0.226	4.31381e-10
Nedd9	1.60179e-14	-1.55432	0.076	0.255	4.35784e-10
Shisal1	1.63526e-14	-1.66801	0.041	0.201	4.44889e-10
Tmem245	1.64762e-14	-0.67941	0.234	0.462	4.48251e-10
Zfp664	1.67047e-14	-0.762107	0.129	0.334	4.54469e-10
Ppip5k1	1.68218e-14	-0.761421	0.117	0.314	4.57653e-10
Scn3b	1.75281e-14	-2.78838	0.025	0.173	4.76869e-10
Adgrg1	1.75624e-14	-1.0822	0.076	0.254	4.77802e-10
Bbof1	1.76625e-14	-1.92942	0.025	0.176	4.80526e-10
Polr3g	1.78412e-14	-1.24934	0.048	0.214	4.85389e-10
Map4k4	1.79256e-14	0.845441	0.683	0.645	4.87683e-10
Nyap2	1.82539e-14	-3.77722	0.015	0.157	4.96615e-10
Ctbp2	1.89818e-14	1.19167	0.406	0.274	5.16419e-10
Morrbid	2.15137e-14	-1.76675	0.122	0.299	5.85301e-10
Sbk1	2.1928e-14	-1.5233	0.048	0.211	5.96574e-10
Cntnap5c	2.19664e-14	-2.14124	0.043	0.202	5.97618e-10
Pfn1	2.20973e-14	-0.867734	0.132	0.336	6.01178e-10
Syngr3	2.21441e-14	-1.54271	0.058	0.227	6.02452e-10
Gpr45	2.2865e-14	-1.32702	0.048	0.213	6.22065e-10
Glrb	2.3083e-14	-1.431	0.053	0.221	6.27995e-10
Sp140	2.39024e-14	1.61767	0.132	0.048	6.50287e-10
Zfyve27	2.43242e-14	-1.09843	0.074	0.251	6.61765e-10
Ttc39c	2.48331e-14	-0.929561	0.081	0.264	6.75611e-10
Rusc1	2.49525e-14	-0.79157	0.096	0.288	6.78858e-10
Wbp2	2.53132e-14	-0.698312	0.117	0.319	6.88672e-10
Paqr9	2.54389e-14	-2.13372	0.041	0.197	6.92091e-10
Zfp462	2.54558e-14	-0.716182	0.315	0.542	6.92549e-10
Dlg1	2.5503e-14	1.08207	0.505	0.392	6.93834e-10
Adamts20	2.55498e-14	-2.12514	0.043	0.198	6.95107e-10
Gpr137c	2.56751e-14	-1.14889	0.079	0.259	6.98516e-10
Rasgef1b	2.62143e-14	-1.24315	0.063	0.233	7.13185e-10
Cpne6	2.62692e-14	-1.4476	0.104	0.283	7.1468e-10
Slitrk1	2.67714e-14	-3.44357	0.013	0.151	7.28342e-10
Sema4f	2.69344e-14	-1.20798	0.03	0.184	7.32778e-10
Msn	2.72093e-14	-0.912321	0.241	0.457	7.40256e-10
Ggt7	2.75383e-14	-0.967612	0.091	0.278	7.49206e-10
Dffa	2.81319e-14	-1.54104	0.051	0.214	7.65357e-10
Ids	2.81664e-14	-1.09431	0.112	0.302	7.66294e-10
St8sia1	2.85024e-14	-1.36951	0.043	0.202	7.75436e-10
Svop	2.88441e-14	-1.00426	0.051	0.218	7.84733e-10
Scoc	2.90412e-14	-0.918187	0.127	0.325	7.90094e-10
Kifc2	2.90751e-14	-1.30473	0.053	0.22	7.91018e-10
Gm26691	2.91184e-14	-1.74769	0.048	0.208	7.92195e-10
Evl	3.00612e-14	-0.924957	0.15	0.353	8.17844e-10
4930578G10Rik	3.20551e-14	1.73993	0.388	0.27	8.7209e-10
Kcnn2	3.31866e-14	-1.86238	0.051	0.212	9.02875e-10
Mink1	3.32842e-14	-0.716799	0.162	0.377	9.05531e-10
Arhgap22	3.3533e-14	-1.54344	0.063	0.231	9.12298e-10
Mertk	3.38836e-14	-1.80851	0.14	0.311	9.21837e-10
Mamld1	3.463e-14	-1.0708	0.104	0.288	9.42145e-10
Eml2	3.55169e-14	-0.73289	0.208	0.429	9.66274e-10
Arhgap17	3.60385e-14	-0.701004	0.218	0.441	9.80463e-10
Pnkd	3.66968e-14	-0.908846	0.14	0.34	9.98374e-10
Tcf20	3.67905e-14	-0.68878	0.272	0.495	1.00092e-09
Gm12116	3.72687e-14	-3.81683	0.003	0.133	1.01393e-09
Tmem151b	3.75267e-14	-2.48066	0.018	0.16	1.02095e-09
Grik1	3.83484e-14	-2.03941	0.289	0.479	1.04331e-09
Sgk3	3.85693e-14	-1.18633	0.076	0.251	1.04932e-09
Tmem151a	3.95246e-14	-1.06244	0.069	0.241	1.07531e-09
Bcar3	4.05769e-14	-1.47485	0.086	0.261	1.10394e-09
Cpne3	4.15932e-14	-0.996167	0.218	0.421	1.13158e-09
Bmerb1	4.16904e-14	-0.620531	0.109	0.303	1.13423e-09
Tspan5	4.17818e-14	0.798358	0.617	0.513	1.13672e-09
Sptbn4	4.25681e-14	-1.22853	0.063	0.234	1.15811e-09
Rragc	4.43857e-14	-0.746306	0.081	0.26	1.20756e-09
Pfkm	4.45143e-14	-1.00932	0.089	0.271	1.21106e-09
Tubb4a	4.48962e-14	-1.03242	0.124	0.318	1.22144e-09
Calcb	4.62287e-14	-1.33747	0.063	0.232	1.2577e-09
Gramd4	4.66738e-14	-0.842545	0.119	0.311	1.26981e-09
Syt6	4.694e-14	-1.97219	0.038	0.191	1.27705e-09
Cdk14	4.70302e-14	-0.715281	0.398	0.598	1.2795e-09
Usp22	4.74781e-14	-0.695436	0.14	0.344	1.29169e-09
Wwtr1	4.82478e-14	0.997232	0.391	0.24	1.31263e-09
Clstn1	4.90352e-14	-0.665204	0.289	0.518	1.33405e-09
Akirin1	5.00704e-14	-0.920266	0.056	0.224	1.36221e-09
Stmn3	5.08581e-14	-0.76712	0.302	0.537	1.38365e-09
Cd59a	5.27404e-14	-0.976133	0.122	0.313	1.43485e-09
Pfkl	5.39937e-14	-1.67543	0.025	0.173	1.46895e-09
Gatm	5.4025e-14	-1.6513	0.086	0.259	1.46981e-09
Mfn2	5.68733e-14	-0.781629	0.099	0.287	1.5473e-09
Rab39	5.81999e-14	-0.683036	0.104	0.295	1.58339e-09
Kcna4	6.03079e-14	-3.53608	0.01	0.143	1.64074e-09
Gm43713	6.05975e-14	-1.11575	0.03	0.182	1.64861e-09
Angpt2	6.32186e-14	-3.01523	0.028	0.17	1.71993e-09
Sox11	6.37286e-14	-2.45664	0.015	0.154	1.7338e-09
Scd1	6.43735e-14	-0.988716	0.18	0.387	1.75135e-09
Ephx1	6.44989e-14	1.75374	0.315	0.197	1.75476e-09
Armcx1	6.49877e-14	-1.06984	0.091	0.271	1.76806e-09
Gm32442	6.57529e-14	-4.1326	0.008	0.139	1.78887e-09
Ghitm	6.733e-14	-0.739845	0.185	0.405	1.83178e-09
Atxn7l3	6.83765e-14	-1.09397	0.081	0.257	1.86025e-09
Lgmn	7.0697e-14	-1.09764	0.137	0.331	1.92338e-09
Evc2	7.09252e-14	1.43161	0.19	0.085	1.92959e-09
Cplx1	7.20689e-14	-0.81948	0.223	0.436	1.96071e-09
Serpini1	7.3466e-14	-1.12658	0.069	0.238	1.99872e-09
Rnf187	7.41585e-14	-0.875654	0.152	0.352	2.01756e-09
Fbxo31	7.53569e-14	-1.11052	0.109	0.293	2.05016e-09
Cystm1	7.56218e-14	-0.815111	0.127	0.321	2.05737e-09
Plcb3	7.62382e-14	-1.06822	0.155	0.347	2.07414e-09
Entpd5	7.74308e-14	-1.69036	0.025	0.171	2.10658e-09
Nrxn2	7.78054e-14	-0.722551	0.203	0.422	2.11677e-09
Purg	7.91545e-14	-0.821596	0.241	0.451	2.15348e-09
Fzd2	8.33445e-14	1.48202	0.147	0.058	2.26747e-09
C77080	8.4256e-14	-0.584971	0.112	0.307	2.29227e-09
Impa1	8.44887e-14	-1.41564	0.043	0.199	2.2986e-09
Napg	8.72876e-14	-0.798404	0.19	0.397	2.37475e-09
Megf10	8.83938e-14	-1.90811	0.114	0.278	2.40484e-09
Azin1	8.92915e-14	-0.732568	0.16	0.369	2.42926e-09
Elovl6	9.16924e-14	-0.831176	0.264	0.486	2.49458e-09
Gab1	9.17681e-14	1.21428	0.558	0.473	2.49664e-09
Tspan2	9.23028e-14	-1.09424	0.056	0.221	2.51119e-09
Usp6nl	9.35172e-14	-1.01033	0.129	0.321	2.54423e-09
Psmb7	9.65162e-14	-0.717446	0.14	0.341	2.62582e-09
Thsd7b	9.69172e-14	-2.20963	0.063	0.223	2.63673e-09
Pcdhac1	1.0017e-13	-2.85245	0.015	0.152	2.72523e-09
Tm6sf1	1.00354e-13	-2.57747	0.02	0.16	2.73023e-09
Cacng7	1.02716e-13	-0.830059	0.038	0.193	2.79449e-09
Gm15675	1.03221e-13	-2.12098	0.033	0.18	2.80823e-09
Clcn3	1.04042e-13	-0.483297	0.282	0.513	2.83056e-09
Mfap3l	1.04345e-13	-1.16195	0.129	0.313	2.83881e-09
Kirrel3	1.04398e-13	-3.14485	0.107	0.273	2.84025e-09
Zdhhc8	1.0523e-13	-0.807438	0.137	0.333	2.86287e-09
Mrgpra2b	1.07233e-13	-1.80773	0.056	0.215	2.91737e-09
Tfpi	1.07827e-13	2.24633	0.104	0.035	2.93353e-09
Mtmr9	1.08229e-13	-1.07431	0.089	0.265	2.94447e-09
Rgs3	1.08661e-13	-0.972607	0.135	0.326	2.95623e-09
Oprm1	1.09459e-13	-1.47512	0.091	0.261	2.97793e-09
Psmd2	1.12165e-13	-0.793138	0.137	0.338	3.05155e-09
Lrrc3b	1.13564e-13	-1.68485	0.02	0.161	3.08962e-09
Nckap5	1.14611e-13	-1.53804	0.122	0.299	3.1181e-09
Cbfb	1.15653e-13	-0.816135	0.228	0.442	3.14647e-09
Slc9a6	1.17426e-13	-1.08331	0.081	0.255	3.1947e-09
Caprin1	1.18622e-13	-0.503258	0.244	0.474	3.22722e-09
Prr16	1.23065e-13	-2.49078	0.028	0.171	3.3481e-09
Dennd6b	1.24425e-13	-1.45713	0.03	0.177	3.3851e-09
Tnik	1.25307e-13	0.86472	0.596	0.512	3.40911e-09
Gpt2	1.29763e-13	-1.32261	0.099	0.277	3.53033e-09
Exoc4	1.30564e-13	0.693375	0.792	0.749	3.55212e-09
Gsk3b	1.3071e-13	-0.568431	0.551	0.728	3.55609e-09
Ccdc60	1.34256e-13	-1.8955	0.038	0.188	3.65256e-09
Ppp1r13b	1.35095e-13	-0.738891	0.14	0.341	3.6754e-09
Agtpbp1	1.36458e-13	-0.6712	0.317	0.523	3.71246e-09
Crispld1	1.36629e-13	1.71988	0.155	0.064	3.71713e-09
Pacrg	1.36777e-13	-0.798017	0.102	0.286	3.72116e-09
Slc22a14	1.37641e-13	-1.49167	0.036	0.185	3.74467e-09
Nav2	1.37849e-13	-2.41689	0.028	0.17	3.75033e-09
Ctdspl	1.38165e-13	1.0344	0.475	0.351	3.75892e-09
Syt4	1.39159e-13	-0.986634	0.218	0.424	3.78597e-09
Tnfrsf11a	1.43142e-13	-2.4913	0.018	0.155	3.89433e-09
Gnaz	1.45129e-13	-0.706206	0.094	0.275	3.94838e-09
Rspo2	1.45157e-13	-2.05248	0.041	0.19	3.94914e-09
Mmp16	1.45825e-13	-0.966247	0.086	0.262	3.96731e-09
Stard3nl	1.46062e-13	-0.64123	0.124	0.322	3.97377e-09
Scn11a	1.46295e-13	-1.31489	0.17	0.356	3.98011e-09
Psmc5	1.59845e-13	-1.10678	0.099	0.278	4.34874e-09
Gm10862	1.65439e-13	-2.79699	0.005	0.132	4.50093e-09
Ryr3	1.65999e-13	-1.13858	0.094	0.27	4.51618e-09
Cab39l	1.68611e-13	-0.567527	0.261	0.49	4.58724e-09
Tns1	1.69709e-13	0.743666	0.624	0.541	4.61712e-09
Fam78b	1.76667e-13	-1.3405	0.099	0.272	4.80641e-09
Nipsnap1	1.80118e-13	-1.27943	0.061	0.224	4.9003e-09
Neurl1a	1.82997e-13	-2.2932	0.02	0.158	4.97861e-09
Taldo1	1.8761e-13	-0.998852	0.091	0.268	5.10411e-09
4930588A03Rik	1.92385e-13	-2.01796	0.046	0.197	5.23404e-09
Lcorl	1.93451e-13	-0.968086	0.216	0.42	5.26303e-09
Evi5	1.93482e-13	-0.618802	0.327	0.541	5.26388e-09
Selenof	1.94413e-13	-0.894844	0.147	0.347	5.2892e-09
Gmds	1.95488e-13	1.11586	0.503	0.396	5.31846e-09
Cds2	2.03013e-13	-1.08453	0.277	0.472	5.52316e-09
Mkrn1	2.09553e-13	-1.13526	0.063	0.227	5.7011e-09
Syne1	2.11775e-13	-1.03458	0.36	0.553	5.76156e-09
Aars	2.1722e-13	-0.92843	0.071	0.241	5.9097e-09
Irs1	2.20791e-13	1.53809	0.305	0.18	6.00684e-09
Kcnt1	2.21659e-13	-1.28638	0.089	0.26	6.03047e-09
Rbms3	2.22901e-13	-0.633591	0.871	0.869	6.06425e-09
Ppip5k2	2.23625e-13	-0.663461	0.142	0.342	6.08393e-09
Rasal2	2.27625e-13	-0.86073	0.322	0.547	6.19276e-09
Ddah1	2.28404e-13	-0.724916	0.086	0.26	6.21395e-09
Bmp7	2.3393e-13	1.65427	0.15	0.061	6.36429e-09
Igsf3	2.38769e-13	-0.752301	0.218	0.432	6.49596e-09
Prkaa2	2.40075e-13	-0.693603	0.084	0.255	6.53148e-09
Panx1	2.41027e-13	-1.48882	0.036	0.181	6.55738e-09
Gm10419	2.41656e-13	-1.12562	0.036	0.184	6.57449e-09
Ppm1j	2.4483e-13	-1.41237	0.056	0.214	6.66086e-09
Echdc1	2.46486e-13	-1.08731	0.063	0.227	6.70589e-09
Pdgfd	2.49293e-13	1.8083	0.16	0.069	6.78226e-09
Hk2	2.52548e-13	2.41044	0.132	0.052	6.87082e-09
Car2	2.52694e-13	-2.20852	0.025	0.165	6.8748e-09
Zfp827	2.53718e-13	-1.10575	0.069	0.235	6.90266e-09
Ppp2r1a	2.59556e-13	-0.839776	0.175	0.38	7.06147e-09
Creld1	2.61561e-13	-0.751514	0.084	0.26	7.11602e-09
Larp4	2.6458e-13	-0.560067	0.17	0.38	7.19817e-09
Igip	2.66135e-13	-1.08063	0.081	0.252	7.24048e-09
Rassf3	2.66933e-13	-1.65069	0.056	0.21	7.26219e-09
Agl	2.66965e-13	-0.740146	0.16	0.357	7.26305e-09
Sms	2.67006e-13	-0.773541	0.129	0.322	7.26416e-09
Jam3	2.82346e-13	-1.14434	0.129	0.311	7.6815e-09
Phtf2	2.83066e-13	-0.972719	0.084	0.257	7.70109e-09
Kctd10	2.86377e-13	-1.18707	0.041	0.191	7.79118e-09
Rragd	2.86924e-13	-1.1439	0.036	0.183	7.80605e-09
Tlcd4	2.91285e-13	-0.723079	0.231	0.447	7.92471e-09
Gm19705	2.92705e-13	-1.61089	0.051	0.204	7.96334e-09
Dstn	2.94339e-13	-0.598982	0.137	0.337	8.00779e-09
Tpi1	2.9465e-13	-0.835137	0.15	0.343	8.01624e-09
Pcyox1l	3.0014e-13	-2.37932	0.02	0.156	8.1656e-09
Six4	3.00237e-13	-1.16778	0.036	0.184	8.16824e-09
Tox2	3.07689e-13	-2.13722	0.023	0.16	8.37098e-09
Rpl18	3.1551e-13	-1.05668	0.102	0.277	8.58376e-09
Syt2	3.18482e-13	-1.39505	0.122	0.297	8.66463e-09
Lrrc8c	3.18677e-13	-0.946194	0.132	0.318	8.66992e-09
Trpc1	3.19981e-13	-0.918369	0.089	0.261	8.70541e-09
Gclc	3.21694e-13	-0.698418	0.089	0.267	8.752e-09
Sel1l3	3.27838e-13	-2.02375	0.036	0.18	8.91915e-09
Wdr1	3.282e-13	-0.761928	0.107	0.29	8.92902e-09
Clpb	3.29109e-13	-0.76083	0.112	0.299	8.95375e-09
Actl6b	3.30236e-13	-1.36775	0.025	0.166	8.9844e-09
Mat2a	3.3861e-13	-0.534096	0.287	0.532	9.21224e-09
Plcd4	3.42956e-13	-1.74776	0.041	0.188	9.33046e-09
Minar1	3.47458e-13	-2.8022	0.018	0.151	9.45295e-09
Rimbp2	3.49144e-13	-2.14893	0.033	0.176	9.4988e-09
Ntrk3	3.5177e-13	0.60316	0.607	0.479	9.57027e-09
Ppfia3	3.59583e-13	-1.11442	0.033	0.178	9.78283e-09
Ang	3.67352e-13	2.23524	0.104	0.036	9.99418e-09
Dzank1	3.78396e-13	-0.698687	0.084	0.26	1.02946e-08
Col19a1	3.85312e-13	-2.42304	0.033	0.174	1.04828e-08
Sntg1	3.91257e-13	-1.79473	0.086	0.249	1.06445e-08
Hsp90ab1	4.18558e-13	-0.876232	0.701	0.831	1.13873e-08
Mal	4.3641e-13	-2.46232	0.056	0.204	1.1873e-08
Ndufa10	4.39222e-13	-0.538145	0.185	0.398	1.19495e-08
Actg1	4.41155e-13	-0.780005	0.383	0.604	1.20021e-08
Cdh8	4.41223e-13	-2.90908	0.028	0.164	1.20039e-08
Vps53	4.42135e-13	-0.811486	0.104	0.284	1.20287e-08
Septin5	4.43426e-13	-0.648555	0.152	0.352	1.20639e-08
Slc4a4	4.54305e-13	-1.13479	0.454	0.619	1.23598e-08
Peg13	4.56273e-13	-1.39833	0.051	0.203	1.24134e-08
2900052N01Rik	4.77082e-13	-3.74805	0.015	0.143	1.29795e-08
Cbx6	4.78166e-13	-0.811414	0.201	0.403	1.3009e-08
Slc25a46	4.85555e-13	-0.677042	0.112	0.294	1.321e-08
Mcam	4.86308e-13	-1.63228	0.048	0.198	1.32305e-08
Cdon	4.88239e-13	-2.19416	0.03	0.171	1.3283e-08
Dclk1	4.89229e-13	-0.580916	0.299	0.522	1.331e-08
Hook1	4.96493e-13	-2.48078	0.01	0.137	1.35076e-08
Fabp7	4.97901e-13	-1.35204	0.089	0.256	1.35459e-08
Gm42941	4.99927e-13	-3.3761	0.003	0.123	1.3601e-08
Usp12	5.0258e-13	-0.708818	0.127	0.317	1.36732e-08
Lrguk	5.09219e-13	-5.26997	0.005	0.126	1.38538e-08
Tmeff1	5.19572e-13	-1.79206	0.038	0.183	1.41355e-08
Pafah1b2	5.23627e-13	-0.678782	0.155	0.351	1.42458e-08
Itga9	5.39209e-13	1.22753	0.249	0.132	1.46697e-08
Nopchap1	5.40997e-13	-1.15457	0.053	0.208	1.47184e-08
Ermp1	5.4484e-13	-1.60603	0.048	0.198	1.48229e-08
Six1	5.56222e-13	-1.42529	0.053	0.207	1.51326e-08
Reep5	5.58355e-13	-0.746985	0.444	0.637	1.51906e-08
Get1	5.71871e-13	-1.18542	0.03	0.171	1.55583e-08
Ubqln1	5.74517e-13	-0.633817	0.122	0.313	1.56303e-08
Dach1	5.83577e-13	-2.11421	0.053	0.203	1.58768e-08
Nfasc	5.85512e-13	-1.18328	0.185	0.375	1.59294e-08
Asns	5.85583e-13	-1.06204	0.038	0.185	1.59314e-08
Rasgrp1	5.89926e-13	-2.45665	0.053	0.198	1.60495e-08
Ap2m1	6.05348e-13	-0.726577	0.132	0.324	1.64691e-08
Tmem250-ps	6.10552e-13	-1.075	0.048	0.199	1.66107e-08
Tenm4	6.25341e-13	-0.771053	0.127	0.309	1.7013e-08
Zfp871	6.25535e-13	-0.508659	0.19	0.397	1.70183e-08
Tmx2	6.25604e-13	-0.814971	0.099	0.275	1.70202e-08
Btbd3	6.26258e-13	-0.47064	0.198	0.414	1.7038e-08
Tmem198b	6.44463e-13	1.87946	0.152	0.065	1.75333e-08
Cab39	6.49157e-13	-0.633919	0.223	0.436	1.7661e-08
Kifap3	6.51854e-13	-0.681642	0.368	0.58	1.77343e-08
Adamtsl4	6.54108e-13	2.22015	0.168	0.076	1.77957e-08
AI593442	6.65507e-13	-1.42498	0.051	0.202	1.81058e-08
Slc2a3	6.88514e-13	-0.826394	0.061	0.22	1.87317e-08
Dnaja1	7.13162e-13	-0.599615	0.279	0.502	1.94023e-08
Bcam	7.19132e-13	-0.871829	0.178	0.374	1.95647e-08
Tppp3	7.24633e-13	-0.782173	0.393	0.612	1.97144e-08
Hacd3	7.27226e-13	-0.560861	0.185	0.396	1.97849e-08
Kcnc2	7.38771e-13	-2.49163	0.051	0.195	2.0099e-08
Acsl4	7.63716e-13	-0.772329	0.135	0.325	2.07776e-08
Eif4g2	7.72968e-13	-0.695509	0.249	0.46	2.10294e-08
Ostf1	7.73012e-13	-0.719052	0.185	0.392	2.10306e-08
Abhd17b	7.90336e-13	-0.643083	0.19	0.396	2.15019e-08
Pmp22	7.94993e-13	-1.63641	0.312	0.526	2.16286e-08
Htr4	7.97952e-13	-2.97788	0.018	0.147	2.17091e-08
Nrp1	7.99216e-13	0.996865	0.409	0.275	2.17435e-08
Pea15a	8.26078e-13	-0.744071	0.178	0.378	2.24743e-08
Ndfip2	8.28843e-13	-0.604741	0.208	0.419	2.25495e-08
Fez1	8.4191e-13	-0.79227	0.185	0.384	2.2905e-08
Usp46	8.4512e-13	1.66998	0.421	0.333	2.29923e-08
C9orf72	8.45264e-13	-0.657179	0.137	0.328	2.29963e-08
Ccdc149	8.65381e-13	-0.927464	0.038	0.184	2.35436e-08
Sqstm1	8.74741e-13	-0.789424	0.249	0.46	2.37982e-08
Bpnt2	8.77235e-13	-0.976415	0.104	0.278	2.38661e-08
Pde7b	8.84791e-13	0.419591	0.673	0.486	2.40716e-08
Cdk5r1	9.10136e-13	-1.75852	0.028	0.164	2.47611e-08
Flot1	9.44388e-13	-0.70091	0.175	0.377	2.5693e-08
Crlf3	9.55789e-13	1.22313	0.464	0.36	2.60032e-08
Rasa2	9.56263e-13	-0.516857	0.282	0.505	2.60161e-08
Scrt2	9.64737e-13	-1.81693	0.02	0.153	2.62466e-08
A430010J10Rik	9.65743e-13	-1.67979	0.005	0.125	2.6274e-08
G3bp2	9.74887e-13	-0.715379	0.244	0.455	2.65228e-08
Lnx2	9.81056e-13	-2.0961	0.03	0.167	2.66906e-08
Tmem255a	9.83181e-13	-1.05553	0.081	0.244	2.67484e-08
Fkbp9	9.84483e-13	1.72639	0.241	0.131	2.67838e-08
Dbi	9.84908e-13	-0.797939	0.195	0.399	2.67954e-08
Clstn3	1.00906e-12	-2.0881	0.025	0.159	2.74526e-08
Slco5a1	1.01765e-12	-2.5963	0.01	0.134	2.76861e-08
Kdsr	1.06283e-12	-0.919849	0.071	0.234	2.89153e-08
Fbxl16	1.0675e-12	-1.05099	0.038	0.183	2.90425e-08
Gramd1b	1.08069e-12	-0.561211	0.368	0.595	2.94011e-08
Eml6	1.10948e-12	-0.733737	0.223	0.426	3.01844e-08
Fbxo44	1.11907e-12	-1.94365	0.03	0.168	3.04455e-08
Ston2	1.13627e-12	-1.10733	0.107	0.278	3.09133e-08
Slc12a4	1.14315e-12	1.35292	0.244	0.129	3.11005e-08
Ccp110	1.14435e-12	-0.654083	0.127	0.312	3.11332e-08
Sema3e	1.14874e-12	-1.64359	0.038	0.178	3.12525e-08
Dpysl4	1.15619e-12	-3.70506	0.008	0.128	3.14552e-08
Fut8	1.18221e-12	-1.05475	0.251	0.461	3.21631e-08
Fbxw7	1.18833e-12	-0.591508	0.254	0.465	3.23298e-08
Cops5	1.20049e-12	-0.592277	0.162	0.361	3.26606e-08
Prkcq	1.20158e-12	-1.82435	0.061	0.21	3.26901e-08
Ankrd6	1.21447e-12	-1.25889	0.058	0.213	3.30409e-08
Slc37a1	1.24069e-12	-2.57225	0.008	0.129	3.37543e-08
Epm2a	1.24161e-12	-1.27075	0.033	0.172	3.37792e-08
Tmem200a	1.30483e-12	-1.99236	0.03	0.166	3.54993e-08
Crebbp	1.32426e-12	0.613387	0.701	0.658	3.60277e-08
Cacnb2	1.36161e-12	-1.46866	0.025	0.16	3.70441e-08
Dusp15	1.36994e-12	-1.88699	0.063	0.215	3.72705e-08
Psmc4	1.38321e-12	-0.842962	0.074	0.236	3.76317e-08
Prkcd	1.40144e-12	-0.878142	0.203	0.398	3.81276e-08
Coro2b	1.41556e-12	-0.652185	0.195	0.404	3.85117e-08
Zfand5	1.41858e-12	-0.794755	0.178	0.373	3.85939e-08
Pgbd5	1.42041e-12	-0.79445	0.051	0.202	3.86436e-08
Rab11fip4	1.42197e-12	-0.94586	0.063	0.221	3.86861e-08
Cpt1a	1.4258e-12	-0.839393	0.129	0.311	3.87903e-08
Brinp1	1.42966e-12	-2.32639	0.025	0.158	3.88953e-08
Ube2ql1	1.45491e-12	-1.24916	0.038	0.18	3.95824e-08
Popdc3	1.46966e-12	-1.34754	0.025	0.16	3.99836e-08
Cyc1	1.47807e-12	-0.955475	0.086	0.252	4.02125e-08
4930469K13Rik	1.51226e-12	-3.54314	0.015	0.139	4.11426e-08
Ldhb	1.5155e-12	-0.830654	0.17	0.356	4.12307e-08
Copz2	1.51808e-12	1.92863	0.119	0.045	4.1301e-08
Pcgf1	1.52598e-12	-0.840881	0.058	0.214	4.15157e-08
Mast4	1.53081e-12	1.10414	0.454	0.347	4.16472e-08
Map3k9	1.53346e-12	-2.78531	0.01	0.132	4.17193e-08
Tmem38a	1.5403e-12	-0.599419	0.089	0.258	4.19054e-08
Stard4	1.56802e-12	-1.12749	0.056	0.208	4.26596e-08
Agrn	1.57123e-12	-1.35961	0.079	0.236	4.27469e-08
Dusp26	1.58667e-12	-0.897425	0.089	0.258	4.31671e-08
Mal2	1.5906e-12	-1.46439	0.061	0.213	4.32739e-08
Pgap4	1.6382e-12	-1.11651	0.043	0.189	4.45688e-08
Pgam1	1.6598e-12	-0.907438	0.165	0.352	4.51566e-08
Pcdha12	1.68556e-12	-1.99475	0.015	0.14	4.58573e-08
Arvcf	1.70502e-12	-1.06823	0.074	0.233	4.63868e-08
Aldoa	1.70945e-12	-0.685241	0.416	0.63	4.65072e-08
Samd8	1.80815e-12	-0.773301	0.094	0.264	4.91925e-08
Vcp	1.8143e-12	-0.730503	0.373	0.582	4.93597e-08
Unc45a	1.82938e-12	-1.09696	0.063	0.218	4.97701e-08
Lmln	1.82952e-12	-0.907356	0.053	0.205	4.9774e-08
Ncs1	1.86527e-12	-0.892715	0.096	0.267	5.07465e-08
Lmo4	1.88463e-12	1.29297	0.386	0.272	5.12732e-08
Cmtm4	1.90056e-12	-0.92625	0.066	0.221	5.17065e-08
Phyhipl	1.96591e-12	-1.97792	0.046	0.187	5.34846e-08
Glo1	1.96901e-12	-0.865495	0.109	0.284	5.3569e-08
Stx3	1.99119e-12	-1.27432	0.041	0.183	5.41723e-08
Nptxr	2.00032e-12	-1.45257	0.048	0.193	5.44206e-08
Atp6ap2	2.04427e-12	-0.654683	0.094	0.265	5.56164e-08
Klhl2	2.0601e-12	-0.709966	0.132	0.311	5.60472e-08
Trim37	2.10624e-12	-0.626823	0.19	0.395	5.73022e-08
Usp14	2.12714e-12	-0.558403	0.198	0.404	5.7871e-08
Irak2	2.12765e-12	1.54005	0.226	0.12	5.78849e-08
Rrp1	2.13518e-12	-0.904644	0.109	0.284	5.80897e-08
Rbm25	2.14208e-12	0.570226	0.756	0.774	5.82775e-08
Kcnk13	2.16716e-12	-3.07123	0.025	0.154	5.89596e-08
Vps50	2.23002e-12	-0.875548	0.089	0.253	6.067e-08
Tlx3	2.23279e-12	-1.5391	0.033	0.169	6.07452e-08
Aqp1	2.25034e-12	-1.69748	0.063	0.212	6.12227e-08
Pank3	2.27727e-12	-0.733234	0.099	0.273	6.19555e-08
Gm29266	2.27789e-12	-3.46187	0.008	0.126	6.19723e-08
Gm17276	2.29256e-12	2.56487	0.223	0.124	6.23715e-08
Jpt1	2.40142e-12	-0.843614	0.109	0.284	6.5333e-08
Hoxd3	2.41351e-12	-1.71214	0.015	0.14	6.5662e-08
Cyp4x1	2.43391e-12	-1.47549	0.008	0.126	6.62169e-08
Rassf2	2.52834e-12	1.10564	0.236	0.122	6.8786e-08
Pdha1	2.53998e-12	-0.942225	0.104	0.274	6.91027e-08
Usp15	2.60859e-12	-0.614269	0.274	0.491	7.09694e-08
Mmp15	2.61948e-12	-1.29584	0.053	0.2	7.12655e-08
Dhrs1	2.63104e-12	-1.01472	0.071	0.228	7.158e-08
Lgr4	2.65766e-12	-1.24235	0.261	0.447	7.23043e-08
Egflam	2.74064e-12	1.45899	0.201	0.1	7.45619e-08
Pcdh15	2.76988e-12	-1.09495	0.058	0.21	7.53575e-08
Rap1gds1	2.77074e-12	-0.607461	0.391	0.621	7.53808e-08
Gpm6a	2.78903e-12	-1.55272	0.053	0.199	7.58784e-08
Tmc7	2.79667e-12	-2.39538	0.023	0.15	7.60862e-08
Hunk	2.83424e-12	-2.11285	0.025	0.155	7.71083e-08
Nptx2	2.83792e-12	-1.16046	0.043	0.184	7.72085e-08
Cfap20dc	2.8767e-12	-2.57165	0.01	0.13	7.82635e-08
Vasp	2.91054e-12	-0.949127	0.081	0.242	7.9184e-08
Dbn1	2.93193e-12	-1.0106	0.091	0.256	7.97662e-08
Cebpd	3.00863e-12	2.33967	0.132	0.054	8.18528e-08
Fus	3.06917e-12	0.620239	0.695	0.67	8.34999e-08
Actr1a	3.09322e-12	-0.516344	0.193	0.396	8.41541e-08
Zfhx2	3.14846e-12	-1.15599	0.091	0.252	8.56571e-08
Zhx2	3.15394e-12	1.01429	0.452	0.331	8.5806e-08
Hsdl2	3.21538e-12	-1.01752	0.079	0.238	8.74776e-08
Ptk2b	3.21662e-12	-3.44709	0.018	0.14	8.75114e-08
Hsp90aa1	3.22598e-12	-0.813311	0.528	0.701	8.7766e-08
Phactr3	3.28172e-12	-0.967985	0.071	0.226	8.92826e-08
Prr13	3.31853e-12	-0.679132	0.104	0.278	9.02839e-08
Cyb5b	3.37452e-12	-0.753559	0.17	0.364	9.18071e-08
Rnps1	3.37909e-12	-0.345202	0.129	0.317	9.19316e-08
Nme1	3.40232e-12	-0.621346	0.091	0.259	9.25635e-08
Gm42722	3.40367e-12	-1.65905	0.025	0.156	9.26003e-08
Cdk9	3.42399e-12	-0.446219	0.096	0.269	9.31531e-08
Apoo	3.46016e-12	-1.18031	0.046	0.189	9.41371e-08
Cyp7b1	3.4887e-12	1.39012	0.277	0.162	9.49134e-08
Saraf	3.50054e-12	-1.07637	0.099	0.266	9.52357e-08
Snx13	3.50381e-12	-0.573118	0.17	0.368	9.53247e-08
Gyg	3.52545e-12	-1.13122	0.061	0.212	9.59135e-08
Xkr6	3.5321e-12	-1.00218	0.15	0.329	9.60942e-08
L3mbtl1	3.54194e-12	-4.27705	0.003	0.115	9.63619e-08
Mapk3	3.56857e-12	-0.705387	0.289	0.5	9.70866e-08
Slc25a22	3.57732e-12	-1.0674	0.046	0.189	9.73246e-08
Diras1	3.57915e-12	-1.18417	0.041	0.18	9.73744e-08
Peli3	3.65233e-12	-1.53939	0.023	0.152	9.93653e-08
Cltb	3.80093e-12	-0.636657	0.193	0.394	1.03408e-07
Tspan14	3.83964e-12	-0.943376	0.162	0.34	1.04461e-07
Panx2	3.85756e-12	-1.20349	0.03	0.164	1.04949e-07
Atp5a1	3.88892e-12	-0.580015	0.266	0.481	1.05802e-07
Nfib	3.92204e-12	0.877007	0.642	0.557	1.06703e-07
Pcolce2	3.93656e-12	-1.92927	0.03	0.162	1.07098e-07
Flot2	3.96808e-12	-0.571638	0.211	0.414	1.07956e-07
Cdh4	3.97323e-12	-2.00252	0.043	0.18	1.08096e-07
Cap1	3.98144e-12	-0.445014	0.104	0.28	1.08319e-07
Qk	4.00281e-12	-1.36612	0.591	0.688	1.089e-07
Ube2m	4.08189e-12	-1.08604	0.081	0.238	1.11052e-07
Lrriq1	4.19985e-12	-1.44373	0.01	0.129	1.14261e-07
Ahi1	4.21886e-12	-0.485823	0.183	0.376	1.14778e-07
Rrm2b	4.24738e-12	-0.549637	0.142	0.329	1.15554e-07
Tmem163	4.2674e-12	-1.90901	0.061	0.205	1.16099e-07
Zfpm2	4.2689e-12	-1.05764	0.173	0.347	1.1614e-07
Lhfp	4.27205e-12	-1.28331	0.244	0.416	1.16225e-07
Csmd3	4.27937e-12	-2.78346	0.048	0.186	1.16425e-07
Stx7	4.42236e-12	-0.619015	0.201	0.401	1.20315e-07
Lurap1l	4.43409e-12	-2.18032	0.02	0.146	1.20634e-07
Mllt11	4.54744e-12	-0.362143	0.132	0.319	1.23718e-07
Cacng2	4.56749e-12	-1.26972	0.028	0.159	1.24263e-07
Gpcpd1	4.62064e-12	-0.657641	0.269	0.488	1.25709e-07
Hspa8	4.63321e-12	-0.712361	0.599	0.767	1.26051e-07
Fbxo7	4.6587e-12	-1.62666	0.071	0.219	1.26745e-07
Atrx	4.83721e-12	0.637462	0.688	0.663	1.31601e-07
Creb3l1	4.94894e-12	2.39885	0.14	0.06	1.34641e-07
Stmn1	5.00691e-12	-0.901874	0.193	0.383	1.36218e-07
Atmin	5.02838e-12	-1.34123	0.048	0.19	1.36802e-07
Frrs1l	5.08499e-12	-2.63195	0.018	0.14	1.38342e-07
Grk2	5.20094e-12	-0.717858	0.157	0.344	1.41497e-07
Josd2	5.20971e-12	-0.630196	0.091	0.256	1.41735e-07
Mgmt	5.27197e-12	2.63932	0.15	0.067	1.43429e-07
Pfn2	5.27666e-12	-0.838534	0.127	0.304	1.43557e-07
Cyrib	5.38839e-12	-0.693149	0.216	0.418	1.46597e-07
Bves	5.4419e-12	-2.04466	0.023	0.148	1.48052e-07
Palmd	5.44736e-12	-0.928756	0.155	0.335	1.48201e-07
Got1	5.46263e-12	-0.962681	0.061	0.21	1.48616e-07
Ntng1	5.48028e-12	-1.59886	0.122	0.28	1.49097e-07
Lonrf1	5.67099e-12	-1.38194	0.036	0.171	1.54285e-07
Synrg	5.76471e-12	-0.675273	0.18	0.375	1.56835e-07
Ccnl2	5.76642e-12	1.17316	0.475	0.389	1.56881e-07
Adam19	5.84675e-12	2.16077	0.332	0.232	1.59067e-07
Smad1	6.00289e-12	-0.483231	0.145	0.331	1.63315e-07
Snx16	6.01714e-12	-1.12556	0.104	0.267	1.63702e-07
Pcsk5	6.05131e-12	-1.09159	0.188	0.358	1.64632e-07
Stambpl1	6.19373e-12	-1.31789	0.048	0.189	1.68507e-07
Kcnk10	6.20559e-12	-2.48713	0.018	0.139	1.68829e-07
Npc1	6.28726e-12	-0.754901	0.094	0.26	1.71051e-07
Plekha4	6.39685e-12	-1.42901	0.251	0.408	1.74033e-07
Grb10	6.44019e-12	1.31129	0.383	0.272	1.75212e-07
Stox2	6.46781e-12	-0.755535	0.345	0.549	1.75963e-07
Gm28050	6.51938e-12	-2.19892	0.013	0.131	1.77366e-07
Tma7	6.54328e-12	-0.438508	0.152	0.349	1.78017e-07
Plat	6.56751e-12	2.04229	0.14	0.059	1.78676e-07
Epb41l3	6.74628e-12	-1.01991	0.482	0.59	1.83539e-07
Aldoc	6.74656e-12	-1.24458	0.053	0.196	1.83547e-07
Etv6	6.83109e-12	0.804647	0.569	0.483	1.85847e-07
Crtac1	6.90467e-12	-2.75265	0.013	0.131	1.87848e-07
Gm28905	6.92457e-12	-1.88533	0.01	0.126	1.8839e-07
Atg7	6.98738e-12	-0.744715	0.137	0.321	1.90099e-07
Pdgfa	7.13896e-12	-0.678546	0.069	0.221	1.94223e-07
Ssbp2	7.1701e-12	0.625263	0.708	0.638	1.9507e-07
Gm21814	7.20323e-12	-2.99605	0.005	0.117	1.95971e-07
Aplp1	7.34343e-12	-1.07364	0.046	0.185	1.99785e-07
Fam102a	7.45363e-12	-0.932427	0.114	0.281	2.02783e-07
Fam81a	7.59953e-12	-2.07989	0.01	0.126	2.06753e-07
Syde1	7.72413e-12	1.91658	0.137	0.057	2.10143e-07
Trpm2	7.7272e-12	-2.75413	0.013	0.13	2.10226e-07
Vegfa	7.83312e-12	-0.767101	0.114	0.286	2.13108e-07
L3mbtl4	7.88029e-12	-2.96662	0.023	0.146	2.14391e-07
Prelid1	8.07992e-12	-0.789799	0.114	0.287	2.19822e-07
Slc25a4	8.09581e-12	-0.741327	0.363	0.561	2.20254e-07
Caln1	8.1292e-12	2.37052	0.249	0.148	2.21163e-07
Pcdh7	8.24718e-12	-0.947708	0.343	0.523	2.24373e-07
Cep170b	8.27895e-12	-0.748716	0.061	0.21	2.25237e-07
Cox19	8.30515e-12	-0.871504	0.046	0.186	2.2595e-07
Kxd1	8.67483e-12	-0.493349	0.142	0.326	2.36007e-07
Prkar1b	9.01408e-12	-0.809909	0.236	0.418	2.45237e-07
Faim2	9.01722e-12	-1.88058	0.03	0.159	2.45323e-07
Ftl1-ps1	9.29107e-12	-0.781602	0.14	0.318	2.52773e-07
Siah3	9.29506e-12	-3.30688	0.008	0.12	2.52881e-07
Zc3h11a.1	9.4369e-12	0.832523	0.596	0.559	2.5674e-07
Itprid2	9.55033e-12	-0.66688	0.142	0.32	2.59826e-07
Uxs1	9.64274e-12	-0.694745	0.074	0.228	2.6234e-07
Shisa4	9.67015e-12	-1.41252	0.051	0.191	2.63086e-07
Ap3s2	9.71822e-12	-0.59691	0.135	0.313	2.64394e-07
Fnip2	9.76739e-12	-1.09591	0.122	0.294	2.65732e-07
Hsph1	1.00259e-11	-0.714434	0.127	0.302	2.72764e-07
Cit	1.00738e-11	-1.74717	0.03	0.159	2.74067e-07
Tuba1a	1.01189e-11	-0.696077	0.627	0.792	2.75295e-07
Ociad1	1.0126e-11	-0.694702	0.201	0.4	2.75489e-07
Fem1b	1.02e-11	-0.568319	0.086	0.246	2.77501e-07
Gpi1	1.02465e-11	-0.505792	0.312	0.528	2.78765e-07
Ccser1	1.02864e-11	-0.96977	0.208	0.369	2.7985e-07
Rit1	1.04532e-11	-0.752276	0.081	0.239	2.84389e-07
Slc25a13	1.0522e-11	-2.14456	0.036	0.163	2.8626e-07
Them6	1.05605e-11	-1.09821	0.084	0.24	2.8731e-07
Rassf4	1.06352e-11	-1.32929	0.061	0.205	2.8934e-07
Mxra8	1.07503e-11	1.78518	0.104	0.038	2.92471e-07
Tmem50b	1.08741e-11	-0.667079	0.099	0.266	2.95841e-07
Cox5a	1.09477e-11	-0.471965	0.165	0.354	2.97844e-07
Crip2	1.10261e-11	-0.721529	0.223	0.421	2.99975e-07
Fhod3	1.10434e-11	-1.69979	0.038	0.17	3.00446e-07
Nktr	1.12167e-11	0.779717	0.665	0.657	3.05162e-07
Cstf2	1.12275e-11	-1.64674	0.025	0.151	3.05455e-07
Nlgn3	1.13109e-11	-1.20556	0.053	0.195	3.07725e-07
Col28a1	1.14574e-11	-1.34968	0.17	0.324	3.1171e-07
Txnrd1	1.16107e-11	-0.661134	0.124	0.301	3.15882e-07
Dlg2	1.16487e-11	-1.24415	0.277	0.457	3.16914e-07
Tmem233	1.16902e-11	-1.33348	0.228	0.4	3.18044e-07
Bsdc1	1.17506e-11	-1.1702	0.071	0.222	3.19686e-07
Denn2b	1.1879e-11	1.13081	0.409	0.294	3.2318e-07
Chn2	1.19066e-11	-1.89426	0.051	0.186	3.23932e-07
Epha6	1.19225e-11	-2.35821	0.096	0.244	3.24364e-07
Gm14507	1.20959e-11	-2.93495	0.01	0.123	3.2908e-07
Gm15513	1.21512e-11	-5.23995	0	0.105	3.30587e-07
Fam174a	1.22658e-11	-0.854798	0.056	0.201	3.33704e-07
Exoc1	1.23577e-11	-0.740991	0.096	0.261	3.36203e-07
Cacybp	1.24236e-11	-1.04064	0.058	0.203	3.37997e-07
Nudt4	1.25014e-11	-0.710631	0.135	0.309	3.40113e-07
Hspa9	1.26382e-11	-0.592888	0.165	0.357	3.43835e-07
Gnb5	1.30804e-11	-1.05021	0.076	0.228	3.55864e-07
Ywhab	1.31603e-11	-0.708767	0.355	0.556	3.5804e-07
Fbxl2	1.32642e-11	-0.614085	0.14	0.318	3.60865e-07
Sdcbp	1.3362e-11	-0.7139	0.218	0.412	3.63526e-07
Tgfbr2	1.34911e-11	0.973201	0.373	0.245	3.67039e-07
Abcb4	1.3698e-11	-2.23844	0.013	0.128	3.72668e-07
Them4	1.37062e-11	-0.720253	0.053	0.195	3.7289e-07
Sytl2	1.39997e-11	-0.986945	0.086	0.24	3.80876e-07
Snx21	1.40158e-11	-0.680421	0.096	0.26	3.81314e-07
Fam241a	1.40827e-11	-2.46707	0.018	0.136	3.83135e-07
St8sia3	1.40999e-11	-1.02159	0.063	0.211	3.83601e-07
Fbxo25	1.44476e-11	-0.790323	0.063	0.211	3.9306e-07
Cers4	1.44972e-11	-0.479999	0.213	0.421	3.9441e-07
Tmem229a	1.46027e-11	-1.49508	0.033	0.162	3.9728e-07
Tbc1d8	1.47767e-11	-1.48261	0.058	0.2	4.02014e-07
Hells	1.49681e-11	-1.19505	0.038	0.171	4.07221e-07
Paqr5	1.50354e-11	-1.84314	0.056	0.192	4.09052e-07
Fkbp2	1.5138e-11	-0.576079	0.119	0.293	4.11843e-07
9530036O11Rik	1.53857e-11	-1.62627	0.03	0.157	4.18582e-07
Tubb4b	1.54544e-11	-0.701951	0.272	0.475	4.20454e-07
Tlx2	1.57789e-11	-1.18752	0.048	0.185	4.2928e-07
Magee1	1.58304e-11	-1.0454	0.076	0.227	4.30683e-07
Pde4b	1.589e-11	-1.1076	0.155	0.32	4.32302e-07
Sytl3	1.5917e-11	-2.02503	0.023	0.143	4.33037e-07
Vat1	1.61913e-11	-0.670532	0.099	0.26	4.40499e-07
Angel1	1.63946e-11	-1.4453	0.036	0.165	4.46031e-07
Synj1	1.64046e-11	-0.66672	0.277	0.484	4.46303e-07
Slc25a51	1.64427e-11	-0.408116	0.162	0.353	4.47341e-07
Basp1	1.64701e-11	-0.898565	0.16	0.337	4.48085e-07
Tmem179	1.64929e-11	-1.86585	0.023	0.145	4.48706e-07
Nxpe3	1.65162e-11	-0.844397	0.066	0.214	4.4934e-07
Itga3	1.66982e-11	-0.728413	0.038	0.171	4.54292e-07
Ccdc28a	1.71869e-11	-0.495746	0.091	0.252	4.67586e-07
Dclk3	1.7251e-11	-1.26966	0.02	0.141	4.69331e-07
Rab14	1.72921e-11	-0.571945	0.34	0.552	4.70449e-07
Tomm20	1.74088e-11	-0.965688	0.074	0.224	4.73625e-07
Mtmr14	1.74818e-11	-0.778931	0.053	0.196	4.7561e-07
Rpl9	1.76156e-11	-0.785409	0.165	0.348	4.79249e-07
Mdh2	1.81065e-11	-0.682693	0.185	0.377	4.92606e-07
Tmem130	1.8253e-11	-0.733227	0.053	0.195	4.9659e-07
Mgat4c	1.83667e-11	-1.87395	0.063	0.205	4.99685e-07
Prkx	1.84588e-11	-0.61716	0.071	0.221	5.0219e-07
Nap1l2	1.861e-11	-1.27369	0.025	0.149	5.06303e-07
Vbp1	1.90054e-11	-0.911657	0.061	0.205	5.1706e-07
Smim13	1.9575e-11	-0.840645	0.081	0.236	5.32556e-07
Dact1	1.98597e-11	2.17513	0.104	0.039	5.40303e-07
Gmpr	1.99184e-11	-1.95244	0.018	0.135	5.41899e-07
Plekha2	1.99195e-11	1.57512	0.279	0.173	5.4193e-07
Map4	2.01467e-11	-0.415201	0.574	0.774	5.48111e-07
AI413582	2.0363e-11	-0.867394	0.086	0.241	5.53996e-07
Tmem106b	2.04578e-11	-0.987039	0.079	0.229	5.56575e-07
Wbp11	2.07848e-11	-0.527104	0.104	0.271	5.65472e-07
Slc38a1	2.08047e-11	-1.32221	0.063	0.206	5.66013e-07
Cct5	2.1002e-11	-0.604298	0.104	0.268	5.71379e-07
Pla2g4a	2.10351e-11	1.54113	0.155	0.07	5.7228e-07
Lnx1	2.11049e-11	-2.24635	0.013	0.126	5.74179e-07
Dnajc1	2.11473e-11	0.843365	0.604	0.539	5.75334e-07
Hoxd4	2.1217e-11	-0.764597	0.074	0.225	5.77231e-07
Cd151	2.12418e-11	-1.00035	0.096	0.252	5.77905e-07
Gal3st1	2.16851e-11	-3.09667	0.02	0.137	5.89965e-07
Suclg1	2.18685e-11	-0.936397	0.091	0.247	5.94956e-07
Zfp180	2.1974e-11	-0.631444	0.079	0.231	5.97825e-07
Mrps5	2.20397e-11	-0.416047	0.084	0.242	5.99613e-07
Wnk2	2.21868e-11	2.05808	0.33	0.235	6.03614e-07
Cdk5rap2	2.2216e-11	-0.525782	0.178	0.373	6.04407e-07
Lingo1	2.24905e-11	-1.14509	0.058	0.198	6.11877e-07
Bdnf	2.24907e-11	-1.78181	0.023	0.144	6.11883e-07
Gabrb1	2.25088e-11	-2.066	0.033	0.159	6.12375e-07
Tigar	2.26945e-11	-1.20186	0.033	0.161	6.17427e-07
Kcns3	2.27465e-11	-1.57805	0.038	0.168	6.18841e-07
Lrrn3	2.27498e-11	-1.15442	0.051	0.187	6.1893e-07
Bnip2	2.33875e-11	-0.617447	0.089	0.246	6.36281e-07
Cdk5r2	2.35752e-11	-0.675182	0.076	0.227	6.41387e-07
Ubap2	2.40392e-11	-0.113467	0.208	0.413	6.54012e-07
Slitrk5	2.45261e-11	-1.83953	0.03	0.155	6.67256e-07
Ttyh3	2.47639e-11	-0.641641	0.058	0.202	6.73728e-07
Ppia	2.47892e-11	-0.581569	0.325	0.542	6.74416e-07
Tmx4	2.49447e-11	-0.715492	0.178	0.362	6.78644e-07
Slc25a3	2.57483e-11	-0.380854	0.251	0.467	7.00509e-07
Dcc	2.57785e-11	-2.0911	0.074	0.213	7.01331e-07
Tecr	2.58955e-11	-0.381503	0.315	0.542	7.04513e-07
Maz	2.609e-11	-0.857426	0.086	0.242	7.09804e-07
Arhgef2	2.62004e-11	1.27952	0.223	0.119	7.12808e-07
Fkbp3	2.63462e-11	-0.634911	0.155	0.337	7.16774e-07
Ckmt1	2.69317e-11	-1.02968	0.058	0.198	7.32703e-07
Hfm1	2.75469e-11	-2.5921	0.005	0.112	7.49441e-07
[truncated: 6,564 more rows]

## Sheet: FindMarkers_FIB_PM
	p_val	avg_log2FC	pct.1	pct.2	p_val_adj
Eya2	0	3.7661	0.839	0.136	0
Ebf2	0	4.09669	0.78	0.11	0
Cped1	0	3.16051	0.873	0.203	0
Foxp2	0	3.13926	0.809	0.172	0
Meox2	0	5.22083	0.669	0.053	0
Itgbl1	0	4.5757	0.705	0.094	0
Bnc2	0	3.69472	0.925	0.333	0
Stxbp6	0	3.04022	0.799	0.216	0
Zbtb7c	0	3.84904	0.745	0.182	0
Dcn	0	3.30453	0.816	0.256	0
Smoc2	0	3.62737	0.645	0.089	0
Tgfbi	0	3.71799	0.603	0.087	0
Foxd2os	0	4.27879	0.579	0.067	0
Itgb4	0	4.12952	0.645	0.135	0
Abi3bp	0	3.22391	0.639	0.135	0
Nhsl2	0	3.53119	0.68	0.183	0
9130410C08Rik	0	4.82589	0.531	0.038	0
Olfr1033	0	4.11958	0.657	0.169	0
Ntn1	0	3.57449	0.563	0.081	0
Igfbp6	0	4.32734	0.548	0.067	0
Egfr	0	3.03733	0.553	0.087	0
Gli1	0	4.74589	0.492	0.035	0
Lbp	0	4.38387	0.492	0.043	0
Mrc2	0	3.50817	0.536	0.094	0
Lmo7	0	4.70372	0.527	0.085	0
Zic1	0	4.00342	0.484	0.045	0
Svep1	0	5.39566	0.471	0.034	0
Colec12	0	3.61754	0.48	0.076	0
Foxd1	0	4.50769	0.412	0.029	0
Pax9	0	5.80988	0.395	0.016	0
Gli2	0	4.15942	0.417	0.044	0
Cldn1	0	5.60623	0.361	0.019	0
Ngf	0	4.64383	0.367	0.028	0
Scara3	0	4.08602	0.352	0.039	0
Clec1a	0	4.99973	0.344	0.033	0
Cldn11	0	4.4683	0.343	0.035	0
Ccdc33	0	6.53657	0.253	0.009	0
Slc6a13	0	5.0261	0.257	0.015	0
Plcd3	8.67884e-307	4.29933	0.432	0.068	2.36117e-302
Cfh	3.43544e-306	2.78935	0.5	0.087	9.34645e-302
Vit	7.42471e-303	3.03929	0.556	0.114	2.01997e-298
Islr	4.1919e-297	4.2723	0.364	0.047	1.14045e-292
Gpc3	3.62881e-290	2.9908	0.612	0.152	9.87254e-286
Ntng1	9.13851e-286	3.33508	0.744	0.256	2.48622e-281
Tenm2	1.59944e-285	3.46395	0.792	0.33	4.35143e-281
Eya1	1.18782e-283	3.61364	0.336	0.04	3.23159e-279
Dock5	1.4958e-281	3.10842	0.757	0.292	4.06946e-277
Cxadr	7.94235e-276	4.56906	0.475	0.095	2.1608e-271
Stra6	1.37263e-273	5.38832	0.197	0.013	3.73437e-269
Ptpn14	2.63502e-267	3.07336	0.607	0.161	7.16883e-263
Bmp6	2.3143e-263	3.03629	0.5	0.104	6.29629e-259
Pkdcc	1.13017e-262	4.20965	0.436	0.082	3.07473e-258
Adamts2	1.76275e-262	3.30626	0.532	0.123	4.79574e-258
Fmo2	1.03694e-261	3.85478	0.316	0.039	2.82111e-257
Prickle1	3.59756e-259	3.2187	0.629	0.185	9.78753e-255
Col6a1	6.51323e-258	3.3133	0.344	0.047	1.77199e-253
Thbs4	3.05819e-238	4.94444	0.204	0.016	8.32012e-234
Plcl1	6.40675e-238	2.65069	0.689	0.246	1.74302e-233
Ror1	6.51904e-237	2.63608	0.679	0.23	1.77357e-232
Por	1.26185e-233	3.37774	0.724	0.318	3.43298e-229
Gab1	9.73504e-233	3.03813	0.808	0.461	2.64851e-228
E330011O21Rik	1.08541e-231	5.87001	0.164	0.01	2.95296e-227
Hoxb6	8.76263e-224	3.22377	0.544	0.15	2.38396e-219
Vill	1.43433e-219	4.16632	0.228	0.023	3.90224e-215
Gm12381	2.93338e-217	5.65069	0.265	0.034	7.98055e-213
Fzd2	1.78606e-216	4.03085	0.319	0.049	4.85917e-212
Col1a1	1.16341e-214	2.42121	0.477	0.108	3.16517e-210
Nr2f2	1.60904e-213	2.6559	0.763	0.372	4.37755e-209
Ptch2	2.44895e-213	4.80632	0.167	0.012	6.66263e-209
Col8a1	3.17878e-213	2.24658	0.604	0.178	8.6482e-209
Ecm2	4.68375e-210	3.91393	0.308	0.047	1.27426e-205
Magi1	1.9032e-204	2.16972	0.892	0.675	5.17784e-200
Ccdc3	2.10178e-203	4.59547	0.211	0.022	5.71811e-199
Dock9	3.12213e-203	2.57511	0.796	0.48	8.49408e-199
Pcolce	1.27348e-201	3.31478	0.34	0.059	3.46464e-197
Tnxb	1.92739e-201	2.64804	0.585	0.186	5.24365e-197
Gpc6	1.98647e-200	2.07687	0.889	0.529	5.4044e-196
Gm42397	1.71574e-196	4.62396	0.252	0.033	4.66785e-192
Sorbs1	2.15647e-196	1.71771	0.931	0.749	5.86689e-192
Plac9	2.2173e-195	2.77137	0.392	0.079	6.03238e-191
Zic4	1.29247e-193	3.67522	0.28	0.041	3.5163e-189
Etl4	7.3187e-191	2.10655	0.807	0.432	1.99113e-186
Pbx1	2.19959e-189	1.86434	0.88	0.601	5.98419e-185
Slc6a20a	6.5179e-188	3.92669	0.207	0.022	1.77326e-183
Klf5	6.5479e-188	3.06145	0.573	0.202	1.78142e-183
Cav1	1.24102e-184	3.448	0.444	0.115	3.37631e-180
C2	2.14711e-184	4.56344	0.261	0.038	5.84142e-180
Itpr2	1.33302e-183	2.72706	0.561	0.186	3.62661e-179
Bicc1	2.85698e-183	2.54845	0.653	0.275	7.7727e-179
Fkbp5	9.64314e-181	2.70388	0.693	0.338	2.62351e-176
Bmpr1b	1.07825e-180	3.52032	0.404	0.096	2.93348e-176
Plk2	5.38003e-180	3.83748	0.395	0.093	1.46369e-175
Eda	7.40507e-179	2.6163	0.636	0.248	2.01462e-174
D830026I12Rik	1.8173e-178	5.06171	0.117	0.006	4.94414e-174
Fhip1a	4.461e-178	3.73188	0.273	0.043	1.21366e-173
Prelp	1.91669e-177	3.90524	0.195	0.021	5.21455e-173
Zbtb16	2.96118e-177	2.37161	0.664	0.28	8.0562e-173
Cdh5	4.41252e-177	3.51453	0.283	0.046	1.20047e-172
Wnt6	5.91434e-177	3.45556	0.337	0.066	1.60906e-172
Scarf2	1.73099e-175	3.74427	0.216	0.026	4.70933e-171
Tspan11	1.80053e-175	2.97981	0.305	0.053	4.89852e-171
Pdzrn3	8.54025e-175	2.80897	0.593	0.226	2.32346e-170
Cadm1	1.37112e-173	-2.44305	0.331	0.802	3.73026e-169
Arhgap42	2.48675e-173	2.58477	0.729	0.417	6.76546e-169
Foxd2	1.14294e-171	4.91174	0.119	0.007	3.10948e-167
Pear1	1.37754e-171	3.45361	0.383	0.089	3.74773e-167
Lamb2	6.78869e-169	3.01212	0.407	0.101	1.84693e-164
Ltbp4	6.11756e-165	2.99357	0.363	0.081	1.66434e-160
Igfbp7	5.29822e-164	2.20685	0.405	0.098	1.44143e-159
Kif21a	1.26167e-163	-1.97308	0.408	0.841	3.43251e-159
Tmem44	1.28488e-162	4.11272	0.265	0.045	3.49566e-158
Ust	1.41363e-162	2.09579	0.743	0.395	3.84593e-158
Ackr3	1.061e-161	3.31349	0.269	0.045	2.88656e-157
Adam33	1.29519e-161	3.26601	0.239	0.035	3.5237e-157
Pcdh19	2.45685e-161	3.5364	0.387	0.098	6.68411e-157
Cald1	5.79383e-161	2.00031	0.693	0.31	1.57627e-156
Foxp1	9.60271e-161	1.60228	0.885	0.686	2.61251e-156
Akap13	1.18651e-154	1.76883	0.827	0.576	3.22801e-150
Luzp2	4.74156e-154	-3.15171	0.173	0.679	1.28999e-149
Slc38a2	2.63858e-153	2.15123	0.808	0.584	7.17853e-149
Dst	4.05846e-153	-1.35411	0.757	0.935	1.10415e-148
Sult5a1	2.00551e-152	3.5046	0.184	0.022	5.45618e-148
Mpzl2	6.23773e-151	4.07933	0.14	0.012	1.69704e-146
Medag	6.6512e-150	3.58679	0.233	0.037	1.80952e-145
Apod	5.18497e-148	1.86806	0.781	0.481	1.41062e-143
Mdfic	1.29862e-146	2.37886	0.457	0.137	3.53301e-142
Lrp4	6.46588e-145	3.16132	0.333	0.077	1.75911e-140
Foxc1	6.19981e-143	3.33521	0.215	0.032	1.68672e-138
Crim1	1.40552e-142	2.48947	0.567	0.229	3.82387e-138
Adgra2	7.4705e-142	2.90437	0.413	0.121	2.03242e-137
Nkain2	7.63997e-142	-2.87308	0.236	0.704	2.07853e-137
Clstn2	1.17124e-141	2.3868	0.637	0.314	3.18648e-137
9530026P05Rik	2.58936e-140	1.86899	0.764	0.438	7.04463e-136
Adgrl3	1.14678e-139	-2.62151	0.217	0.699	3.11993e-135
F11r	3.17111e-139	3.39694	0.28	0.056	8.62733e-135
Cgnl1	5.61766e-137	2.39047	0.549	0.221	1.52834e-132
Sulf1	1.1131e-136	2.06249	0.656	0.315	3.02831e-132
Prodh	3.07393e-136	3.44094	0.308	0.07	8.36292e-132
Adarb1	1.43978e-134	3.17533	0.513	0.21	3.91707e-130
Pex5l	1.98638e-134	-2.55782	0.147	0.648	5.40415e-130
Cyp27a1	8.24269e-134	3.29925	0.288	0.062	2.24251e-129
Lepr	1.52404e-132	3.51542	0.375	0.108	4.1463e-128
Airn	8.54109e-132	1.71738	0.719	0.374	2.32369e-127
Klf12	1.00322e-130	1.82812	0.711	0.396	2.72936e-126
Dlgap1	5.2332e-129	-2.57136	0.183	0.66	1.42374e-124
Pcdh9	1.5798e-128	-2.31963	0.401	0.794	4.298e-124
Pde3a	2.73206e-127	2.82923	0.355	0.096	7.43285e-123
Arhgef28	5.40949e-126	2.2686	0.623	0.325	1.47171e-121
Col1a2	1.54907e-125	1.64881	0.641	0.291	4.21439e-121
Frmd4b	1.48124e-123	1.87072	0.688	0.376	4.02987e-119
Rbms3	8.68011e-121	-1.50573	0.676	0.877	2.36151e-116
Ntrk3	4.99214e-120	1.26997	0.784	0.468	1.35816e-115
Tmtc2	1.49626e-118	-2.78874	0.164	0.627	4.07071e-114
Ahnak	2.25969e-118	1.40838	0.853	0.671	6.14771e-114
Ralgps2	7.20021e-118	2.47893	0.576	0.294	1.95889e-113
Il1rapl1	8.49547e-118	-2.60561	0.187	0.635	2.31128e-113
Slc13a4	1.1937e-117	3.56715	0.217	0.04	3.24758e-113
Neat1	1.38302e-116	1.10183	0.945	0.641	3.76265e-112
Edil3	7.04043e-116	-2.31446	0.264	0.69	1.91542e-111
Ildr2	7.66092e-116	2.66049	0.332	0.09	2.08423e-111
Ptprt	1.26718e-115	-2.76254	0.188	0.621	3.44749e-111
Ptpn13	2.02272e-115	1.78892	0.737	0.485	5.50302e-111
Abcb1a	2.71082e-113	1.63482	0.348	0.094	7.37505e-109
Ccnd3	4.3081e-113	1.66179	0.584	0.267	1.17206e-108
Tbx15	2.39098e-112	2.75438	0.269	0.061	6.5049e-108
Adamts10	3.78796e-112	2.51291	0.445	0.166	1.03055e-107
Fgf14	1.99456e-111	3.34193	0.483	0.204	5.42641e-107
Hlf	2.1603e-111	2.63423	0.317	0.084	5.87731e-107
Efna5	4.99702e-111	1.92674	0.663	0.383	1.35949e-106
Lsamp	7.77996e-111	-2.13383	0.468	0.78	2.11662e-106
Aatk	1.62571e-110	-2.60426	0.113	0.572	4.42289e-106
Ltbp1	3.07677e-110	3.05207	0.308	0.082	8.37066e-106
Ldlrad3	9.1876e-110	2.00113	0.577	0.279	2.49958e-105
Cspg4	4.74198e-109	2.80992	0.305	0.08	1.2901e-104
Foxc2	5.62829e-109	3.46373	0.127	0.014	1.53123e-104
Arhgap39	1.63699e-108	-2.35354	0.155	0.605	4.45361e-104
Flrt2	1.75472e-107	2.81237	0.423	0.158	4.77388e-103
Ldlrad4	2.27363e-107	1.72845	0.628	0.319	6.18564e-103
Enox1	3.246e-107	-2.97257	0.161	0.579	8.83107e-103
Anpep	1.23333e-106	3.05479	0.185	0.031	3.35538e-102
Gm15902	1.10879e-105	3.11772	0.2	0.037	3.01658e-101
Dock6	1.40812e-105	2.48046	0.443	0.169	3.83093e-101
Trim2	1.57935e-105	-1.82011	0.249	0.694	4.29679e-101
Pla2g4a	3.55066e-104	2.97043	0.264	0.063	9.65993e-100
Oxr1	1.53385e-103	-1.93401	0.224	0.647	4.173e-99
Sorcs1	6.57693e-103	-3.1372	0.135	0.55	1.78932e-98
Slc35f1	1.72665e-102	-3.03215	0.147	0.567	4.69752e-98
Grik2	2.43463e-101	-3.12263	0.131	0.548	6.62367e-97
Pik3ap1	2.07024e-100	2.43378	0.249	0.057	5.63228e-96
Fhl2	1.66639e-99	3.30958	0.233	0.053	4.53358e-95
9330159F19Rik	1.25825e-98	-2.6812	0.081	0.505	3.4232e-94
Prrx1	1.46156e-98	1.86547	0.257	0.06	3.97633e-94
Clic6	1.61117e-98	3.7348	0.127	0.016	4.38335e-94
Ldb2	1.95583e-98	1.33769	0.708	0.386	5.32104e-94
Dtna	7.041e-98	-2.13818	0.143	0.57	1.91557e-93
Nr3c2	1.4203e-96	1.63228	0.707	0.471	3.86407e-92
Asap1	3.5859e-96	-1.58816	0.34	0.729	9.7558e-92
Ank3	5.06884e-96	-1.94938	0.373	0.709	1.37903e-91
Nebl	5.30346e-96	1.52634	0.711	0.464	1.44286e-91
Srgap1	1.05759e-95	-2.69938	0.101	0.512	2.87727e-91
Per3	2.21741e-95	1.73262	0.657	0.402	6.03268e-91
Rgs6	1.1221e-93	1.72308	0.513	0.231	3.05279e-89
Ptprk	1.50919e-93	1.89483	0.404	0.15	4.10589e-89
Aff3	2.79275e-93	1.15244	0.768	0.505	7.59795e-89
Slc9a9	2.85946e-93	-2.47841	0.244	0.608	7.77946e-89
Nav3	7.8111e-93	-2.74191	0.135	0.54	2.12509e-88
Adgrb3	3.33603e-92	-2.99841	0.172	0.565	9.076e-88
Kif1a	1.44407e-90	-1.70615	0.259	0.651	3.92873e-86
Cavin2	2.05203e-90	3.1189	0.188	0.037	5.58274e-86
Arhgap24	2.80597e-90	-2.51271	0.159	0.56	7.63393e-86
Ppm1l	5.5992e-90	-1.84654	0.169	0.581	1.52332e-85
Ptch1	6.07209e-90	2.73584	0.601	0.384	1.65197e-85
Grid2	1.91328e-89	-2.76576	0.164	0.547	5.20528e-85
Atp2b4	1.6943e-88	1.81025	0.488	0.216	4.60951e-84
Dclk2	4.67783e-88	-2.68133	0.091	0.483	1.27265e-83
Rims2	8.32163e-88	-2.59293	0.101	0.49	2.26398e-83
Adamts12	8.85371e-88	2.25129	0.369	0.132	2.40874e-83
Lrrc4c	9.39419e-88	-2.70199	0.153	0.548	2.55578e-83
Dysf	1.8688e-87	-2.51802	0.071	0.466	5.08426e-83
Utrn	4.25418e-87	0.842314	0.903	0.839	1.15739e-82
Etnk2	1.1389e-86	3.97056	0.145	0.024	3.09848e-82
Fn1	3.39218e-86	2.30846	0.272	0.076	9.22878e-82
C1qtnf7	7.0942e-86	2.56646	0.271	0.076	1.93005e-81
Sema3d	7.35458e-86	3.18104	0.292	0.091	2.00089e-81
Anxa3	8.61679e-86	2.25204	0.264	0.071	2.34428e-81
Zbtb20	8.83324e-86	0.748839	0.973	0.932	2.40317e-81
Kcnk5	9.97626e-86	2.60337	0.327	0.107	2.71414e-81
9530059O14Rik	1.14925e-85	-3.34242	0.195	0.533	3.12666e-81
Gm49417	2.79417e-85	3.07868	0.251	0.068	7.60181e-81
Cp	2.81302e-85	1.68656	0.544	0.268	7.65309e-81
Nalcn	3.37126e-85	2.15189	0.531	0.293	9.17185e-81
Itga9	3.6499e-85	2.54088	0.351	0.125	9.92991e-81
Arhgap18	6.25838e-85	2.38305	0.435	0.192	1.70265e-80
Cdkn1c	9.84568e-85	3.1297	0.125	0.018	2.67861e-80
Plpp3	1.32645e-84	1.5794	0.672	0.422	3.60873e-80
Csmd1	1.90728e-84	-1.8845	0.72	0.855	5.18894e-80
Ntn4	3.01085e-84	2.82729	0.299	0.094	8.19132e-80
Kif1b	4.60056e-84	-1.12802	0.705	0.885	1.25163e-79
Nrxn1	1.81438e-83	-2.5757	0.277	0.604	4.93619e-79
Sipa1l1	1.98996e-83	1.54496	0.637	0.394	5.4139e-79
Stox2	2.05416e-83	-2.26781	0.169	0.561	5.58854e-79
Prune2	3.04919e-83	-2.14909	0.481	0.714	8.29562e-79
Retreg1	4.97534e-82	-1.90094	0.147	0.545	1.35359e-77
Ror2	6.0841e-82	2.1351	0.508	0.259	1.65524e-77
Nbl1	2.25784e-81	2.31904	0.468	0.229	6.14267e-77
Ppp2r2b	3.66835e-81	-2.53857	0.133	0.501	9.9801e-77
Parva	3.80096e-80	1.79231	0.629	0.425	1.03409e-75
Astn2	4.58221e-80	-2.44853	0.136	0.502	1.24663e-75
Gna14	4.64029e-80	1.90277	0.437	0.188	1.26244e-75
Anks1b	7.40275e-80	-2.43999	0.171	0.534	2.01399e-75
Rai14	8.07941e-80	1.89972	0.501	0.253	2.19808e-75
St3gal4	1.10193e-79	1.35781	0.704	0.451	2.99792e-75
Tshz3	2.07359e-79	1.7388	0.625	0.411	5.64141e-75
Rasl12	2.22583e-79	2.94996	0.2	0.047	6.0556e-75
Mill2	4.97139e-79	2.12499	0.42	0.182	1.35252e-74
Add3	1.32815e-78	1.45375	0.68	0.468	3.61338e-74
Sox9	1.47655e-78	3.75898	0.105	0.014	4.01709e-74
Cadps	7.20219e-78	-2.70754	0.203	0.529	1.95943e-73
Ripor2	8.5001e-78	1.82577	0.388	0.156	2.31254e-73
Lmo4	8.78631e-78	2.05829	0.501	0.265	2.3904e-73
Rims1	1.13795e-77	-2.80413	0.113	0.462	3.09591e-73
Nhs	1.32404e-77	1.79257	0.643	0.442	3.60219e-73
Sik3	1.52267e-77	1.44978	0.667	0.433	4.14257e-73
Cdh2	7.27089e-77	-2.70529	0.077	0.437	1.97812e-72
Nfatc1	8.08879e-77	2.40113	0.28	0.087	2.20064e-72
Frmd3	1.12477e-76	-2.37213	0.111	0.472	3.06005e-72
Sema6d	1.62372e-76	-2.52106	0.125	0.483	4.4175e-72
Sntb1	1.66459e-76	-2.64685	0.101	0.457	4.52869e-72
Dnajc6	2.95062e-76	-1.95223	0.109	0.481	8.02746e-72
Col8a2	3.32788e-76	2.73507	0.165	0.034	9.05382e-72
Ctnnd2	4.11508e-76	-2.05993	0.317	0.657	1.11955e-71
Adam23	4.6678e-76	-2.30173	0.124	0.487	1.26992e-71
Sox2ot	5.777e-76	-2.79771	0.108	0.46	1.57169e-71
Atp8a1	7.82916e-76	-1.28648	0.431	0.751	2.13e-71
Hhip	2.71318e-75	3.66888	0.119	0.018	7.38149e-71
Gm13986	3.07434e-75	3.79787	0.172	0.037	8.36406e-71
Csgalnact1	4.58777e-75	-2.12584	0.1	0.466	1.24815e-70
Pclo	4.92396e-75	-1.82178	0.213	0.562	1.33961e-70
Csmd2	7.36334e-75	-2.01361	0.128	0.482	2.00327e-70
Mtcl1	9.61903e-75	-2.32645	0.093	0.451	2.61695e-70
Soga3	2.99342e-74	-1.67892	0.188	0.555	8.14391e-70
Cpeb2	3.94697e-74	-1.91557	0.125	0.495	1.07381e-69
Sh3kbp1	6.50655e-74	-2.30361	0.112	0.472	1.77017e-69
Serping1	6.64844e-74	2.67208	0.327	0.123	1.80877e-69
Sv2c	7.5859e-74	-1.93919	0.157	0.518	2.06382e-69
Rgs7	1.11454e-73	-2.90047	0.077	0.422	3.03222e-69
Zeb2	5.20343e-73	-1.81568	0.353	0.676	1.41564e-68
Spata13	7.56838e-73	-2.10546	0.107	0.47	2.05905e-68
Prkd1	8.26689e-73	-2.37588	0.093	0.445	2.24909e-68
Pkp4	5.94188e-72	1.89671	0.535	0.32	1.61655e-67
Ncam2	7.70355e-72	-2.77184	0.145	0.484	2.09583e-67
Frmd4a	2.52676e-71	-1.48942	0.444	0.711	6.87431e-67
Kank2	2.80618e-71	2.23125	0.352	0.138	7.63448e-67
9630002D21Rik	2.86544e-71	4.88876	0.151	0.031	7.79573e-67
Rgma	3.11547e-71	2.53636	0.301	0.107	8.47594e-67
Erc2	4.33119e-71	-2.77723	0.111	0.443	1.17834e-66
Aebp1	5.86143e-71	2.38235	0.233	0.066	1.59466e-66
Cadm2	9.49623e-71	-2.37914	0.189	0.522	2.58354e-66
Sorcs2	1.26727e-70	1.75747	0.464	0.225	3.44773e-66
Dact1	1.30745e-70	3.67336	0.161	0.035	3.55704e-66
Amph	1.35264e-70	-2.03979	0.108	0.464	3.68e-66
Zdhhc2	1.39119e-70	-1.69909	0.188	0.553	3.78488e-66
Adamts14	1.85297e-70	3.32645	0.165	0.036	5.04118e-66
Fzd7	3.19306e-70	3.21731	0.159	0.034	8.68705e-66
Hcn1	3.41303e-70	-2.38194	0.164	0.502	9.28549e-66
Slc24a2	5.60697e-70	-2.23455	0.153	0.491	1.52543e-65
Atp1a2	7.3145e-70	2.08675	0.637	0.45	1.98998e-65
Foxp4	1.05292e-69	2.38856	0.352	0.143	2.86458e-65
Hoxc6	2.21855e-69	2.04052	0.521	0.318	6.0358e-65
Mapt	3.83574e-69	-1.34697	0.337	0.659	1.04355e-64
Unc80	6.57985e-69	-2.4029	0.093	0.429	1.79011e-64
Eepd1	7.17383e-69	-1.79068	0.199	0.547	1.95171e-64
Nrcam	1.25053e-68	-2.80276	0.064	0.393	3.40219e-64
Akap6	1.35318e-68	-1.93503	0.197	0.519	3.68146e-64
Fmnl2	1.93464e-68	1.00952	0.839	0.724	5.26339e-64
Kcnq1ot1	2.14759e-68	1.26316	0.727	0.516	5.84273e-64
Tec	2.4355e-68	1.91637	0.447	0.216	6.62601e-64
Nav1	4.37132e-68	-1.54336	0.225	0.566	1.18926e-63
Kcnh7	8.99477e-68	-2.69665	0.181	0.494	2.44712e-63
Kcnb2	9.5989e-68	-2.3382	0.324	0.593	2.61148e-63
Shisa3	2.66171e-67	2.98383	0.189	0.048	7.24144e-63
Gng2	3.38326e-67	-1.56652	0.129	0.489	9.20451e-63
Agmo	3.59648e-67	1.57815	0.508	0.267	9.78457e-63
Ddr2	6.06323e-67	1.90395	0.361	0.148	1.64956e-62
Mmp14	8.76188e-67	2.22868	0.32	0.121	2.38376e-62
Gm29683	1.45584e-66	1.18335	0.636	0.363	3.96077e-62
Elavl4	1.90194e-66	-1.73246	0.255	0.558	5.17442e-62
Chl1	2.06687e-66	-2.86113	0.081	0.404	5.62312e-62
Tjp1	2.13124e-66	1.62029	0.619	0.443	5.79824e-62
Elovl6	3.31941e-66	-1.80044	0.144	0.496	9.03078e-62
Ncam1	5.98579e-66	-1.72093	0.332	0.648	1.62849e-61
Col6a2	6.82908e-66	2.48055	0.229	0.068	1.85792e-61
Mical3	2.31261e-65	1.27667	0.711	0.584	6.29168e-61
Lima1	2.6238e-65	1.84971	0.527	0.32	7.13832e-61
Slco2b1	3.173e-65	2.01294	0.192	0.049	8.63247e-61
Prkg1	3.50621e-65	-1.28636	0.708	0.851	9.539e-61
Rian	7.51256e-65	-2.46167	0.188	0.49	2.04387e-60
2610307P16Rik	9.18507e-65	1.47209	0.611	0.401	2.49889e-60
Schip1	1.16101e-64	-2.48077	0.149	0.484	3.15865e-60
Igsf11	2.1152e-64	-2.78898	0.073	0.386	5.7546e-60
Prex2	2.46743e-64	-2.60089	0.101	0.418	6.71288e-60
Kcna6	4.03949e-64	-2.68911	0.063	0.38	1.09898e-59
Rnf157	5.24024e-64	-1.87804	0.105	0.441	1.42566e-59
Gm4258	1.06858e-63	-1.87857	0.099	0.427	2.90717e-59
Dpp6	1.21876e-63	-2.68578	0.272	0.554	3.31575e-59
Epb41l4b	1.55032e-63	-2.42924	0.085	0.405	4.2178e-59
Ptprz1	1.80744e-63	-2.98233	0.083	0.392	4.91733e-59
Zfyve28	1.97905e-63	-2.28492	0.059	0.376	5.3842e-59
Il15	2.14524e-63	2.32467	0.207	0.057	5.83635e-59
Dock3	2.24093e-63	-2.47762	0.084	0.398	6.09666e-59
Thsd4	3.0162e-63	2.26036	0.477	0.278	8.20587e-59
Snhg14	4.81038e-63	-2.5536	0.104	0.417	1.30871e-58
C78859	6.81876e-63	-3.20708	0.059	0.357	1.85511e-58
Fgf12	1.24768e-62	-2.41107	0.247	0.558	3.39443e-58
Fam78b	1.34445e-62	2.39003	0.453	0.26	3.65771e-58
Lrfn5	1.43843e-62	-3.04956	0.079	0.381	3.9134e-58
5330434G04Rik	2.10402e-62	-2.70737	0.06	0.367	5.7242e-58
Dclk1	2.46802e-62	-1.7172	0.195	0.531	6.71448e-58
Tanc2	2.48102e-62	-1.22877	0.359	0.693	6.74987e-58
Bmp1	2.53627e-62	2.29465	0.379	0.173	6.90017e-58
Pld1	4.75876e-62	1.67254	0.488	0.269	1.29467e-57
Fbln1	7.01166e-62	3.12965	0.123	0.023	1.90759e-57
Kank1	7.5835e-62	-2.2528	0.109	0.43	2.06317e-57
Pde9a	8.06286e-62	3.27145	0.144	0.031	2.19358e-57
Dgka	8.47409e-62	2.27889	0.369	0.169	2.30546e-57
Fap	1.20256e-61	1.78294	0.263	0.087	3.27168e-57
Bach2	1.35445e-61	-1.62968	0.281	0.596	3.68491e-57
Loxl2	1.45465e-61	2.79883	0.22	0.067	3.95753e-57
Ccser2	1.73416e-61	-1.13499	0.349	0.673	4.71796e-57
Hecw1	2.0152e-61	-2.23227	0.125	0.436	5.48255e-57
Hoxb4	2.3376e-61	2.64717	0.257	0.088	6.35968e-57
Gm26871	3.22827e-61	-2.96743	0.199	0.477	8.78282e-57
Pcdh7	8.21e-61	-1.45365	0.208	0.533	2.23361e-56
Kif5c	8.63199e-61	-1.83425	0.223	0.538	2.34842e-56
Trim36	1.13619e-60	-2.06512	0.116	0.43	3.09113e-56
Ppp1r9a	1.72176e-60	-1.6837	0.197	0.522	4.68422e-56
Fdft1	3.76662e-60	-1.40752	0.144	0.49	1.02475e-55
Bace2	3.79148e-60	2.62521	0.288	0.111	1.03151e-55
Kcna2	4.31635e-60	-1.81792	0.163	0.495	1.17431e-55
Ddx5	5.38353e-60	0.958539	0.807	0.758	1.46464e-55
Pag1	5.97029e-60	-1.76728	0.119	0.445	1.62428e-55
Chd9	6.77375e-60	0.809098	0.847	0.792	1.84287e-55
Grtp1	6.79942e-60	3.98284	0.132	0.028	1.84985e-55
Gm48025	1.12794e-59	2.9089	0.192	0.054	3.06866e-55
Dlc1	1.16012e-59	1.39363	0.68	0.543	3.15623e-55
Fmn2	1.38151e-59	-2.14126	0.095	0.412	3.75853e-55
Dmd	1.44628e-59	-1.40465	0.436	0.691	3.93475e-55
Mgp	1.92626e-59	1.6264	0.259	0.086	5.24059e-55
Rtn1	2.13057e-59	-1.1799	0.393	0.696	5.79643e-55
Coro2b	2.47868e-59	-1.71409	0.092	0.413	6.7435e-55
Cntnap2	2.64537e-59	-2.35004	0.407	0.651	7.197e-55
Cdh19	2.89556e-59	-2.84647	0.159	0.446	7.87766e-55
Cacna1b	4.11329e-59	-2.52723	0.083	0.381	1.11906e-54
C1s1	4.17106e-59	2.83106	0.117	0.022	1.13478e-54
Lix1	5.98483e-59	-1.50829	0.195	0.528	1.62823e-54
Rapgef3	7.01284e-59	2.07682	0.209	0.061	1.90791e-54
Gm16046	7.66855e-59	3.44363	0.123	0.024	2.08631e-54
Rapgef5	8.14665e-59	-2.53111	0.071	0.371	2.21638e-54
Nfia	1.07512e-58	0.84855	0.867	0.731	2.92497e-54
Ptpre	1.13484e-58	-2.24641	0.089	0.396	3.08745e-54
Msmo1	1.35175e-58	-1.62617	0.119	0.446	3.67758e-54
Ctnnal1	1.7258e-58	-1.78936	0.16	0.483	4.69521e-54
Srgap3	2.82893e-58	-1.21353	0.255	0.587	7.69638e-54
Kctd16	4.09328e-58	-3.01415	0.147	0.433	1.11362e-53
Kctd8	4.16298e-58	-2.65011	0.105	0.397	1.13258e-53
Col3a1	4.67976e-58	1.50023	0.297	0.11	1.27318e-53
Grid1	6.7343e-58	-2.5407	0.092	0.387	1.83213e-53
Efemp1	1.02076e-57	1.96956	0.329	0.137	2.77709e-53
Cavin1	1.25227e-57	2.31568	0.273	0.101	3.40693e-53
Ralyl	1.77963e-57	-2.57393	0.167	0.455	4.84167e-53
Dpysl2	2.57125e-57	-1.17274	0.332	0.641	6.99534e-53
Adamts1	3.63624e-57	2.94062	0.183	0.051	9.89275e-53
Acyp2	5.31433e-57	-1.24351	0.211	0.548	1.44582e-52
Elavl2	6.11366e-57	-1.79194	0.22	0.507	1.66328e-52
Lamb1	6.32673e-57	-2.88751	0.053	0.339	1.72125e-52
Adam12	6.6398e-57	2.54424	0.273	0.103	1.80642e-52
Ldlr	8.23962e-57	-1.52533	0.127	0.452	2.24167e-52
Pnisr	8.40808e-57	0.950028	0.807	0.738	2.2875e-52
Scn9a	1.66354e-56	-1.73348	0.267	0.539	4.52583e-52
Reep1	1.75065e-56	-1.76863	0.153	0.461	4.76282e-52
Ppp3ca	1.77205e-56	-0.957436	0.668	0.873	4.82104e-52
Nek1	1.87579e-56	-1.32366	0.295	0.609	5.10328e-52
Lama4	2.2682e-56	1.03564	0.688	0.47	6.17087e-52
Fbn1	2.69512e-56	1.70914	0.369	0.17	7.33235e-52
Nrxn3	3.33281e-56	-2.35225	0.217	0.502	9.06723e-52
Myt1l	4.75847e-56	-1.98931	0.131	0.419	1.29459e-51
Grik3	4.89739e-56	-1.58783	0.181	0.51	1.33238e-51
Rap1gap	5.36618e-56	-2.5071	0.047	0.332	1.45992e-51
Nsdhl	6.72116e-56	-1.96607	0.088	0.391	1.82856e-51
Rab3il1	6.91167e-56	2.95299	0.135	0.03	1.88039e-51
Trim9	8.28111e-56	-2.15833	0.056	0.345	2.25296e-51
Gas6	8.54775e-56	2.02326	0.463	0.276	2.3255e-51
Ano3	8.58472e-56	-2.51962	0.144	0.438	2.33556e-51
Fyn	9.96684e-56	-1.64694	0.136	0.455	2.71158e-51
Arhgap6	1.20094e-55	1.99963	0.357	0.164	3.26728e-51
Nrg3	1.20258e-55	-2.82767	0.248	0.508	3.27174e-51
Hoxb5	1.57611e-55	2.49991	0.301	0.126	4.28797e-51
Col12a1	1.65532e-55	2.06553	0.251	0.088	4.50345e-51
Ctnna2	1.86646e-55	-2.4389	0.364	0.606	5.07789e-51
Pcbp3	3.26943e-55	-1.7505	0.247	0.526	8.8948e-51
Nrg1	3.61634e-55	-2.399	0.168	0.46	9.8386e-51
Fmn1	3.97634e-55	-2.08658	0.191	0.47	1.0818e-50
Mfap5	5.09035e-55	1.64046	0.485	0.286	1.38488e-50
Grip1	9.62195e-55	-2.54416	0.187	0.457	2.61775e-50
Ppp1r1c	1.47294e-54	-1.85802	0.151	0.445	4.00727e-50
Grb14	1.77871e-54	-1.7747	0.131	0.436	4.83915e-50
Zfp536	2.00833e-54	-1.93631	0.161	0.458	5.46386e-50
Csrnp3	2.74413e-54	-2.20802	0.08	0.368	7.46569e-50
1500004A13Rik	3.29624e-54	-1.68202	0.073	0.371	8.96776e-50
Rgs7bp	3.82094e-54	-1.59408	0.311	0.586	1.03952e-49
Pawr	6.0665e-54	2.90628	0.236	0.084	1.65045e-49
Unc79	7.54644e-54	-2.69864	0.059	0.334	2.05308e-49
Dpysl5	9.84648e-54	-2.08245	0.056	0.341	2.67883e-49
Chd3	1.12259e-53	1.66011	0.557	0.387	3.05411e-49
Myo5a	1.86511e-53	-1.39531	0.235	0.548	5.07422e-49
Gabbr2	2.04165e-53	-1.85358	0.129	0.421	5.55451e-49
Dab2	2.52221e-53	2.05659	0.284	0.113	6.86192e-49
D130009I18Rik	2.57595e-53	-2.86194	0.149	0.425	7.00814e-49
Snap91	3.13777e-53	-1.96328	0.105	0.395	8.53661e-49
1700025G04Rik	4.55455e-53	-1.50539	0.135	0.444	1.23911e-48
Hmgcs1	4.58007e-53	-1.16552	0.245	0.581	1.24605e-48
Gdpd5	5.18404e-53	2.13822	0.445	0.27	1.41037e-48
L1cam	5.84338e-53	-1.4637	0.127	0.437	1.58975e-48
Map7	8.6915e-53	-2.0643	0.097	0.382	2.36461e-48
Col28a1	1.38395e-52	-2.97185	0.064	0.332	3.76518e-48
Tnik	1.40152e-52	-1.28511	0.207	0.527	3.81298e-48
Galnt13	1.54328e-52	-2.70647	0.1	0.377	4.19865e-48
Tmod2	1.68733e-52	-1.07805	0.303	0.631	4.59056e-48
Tmem178b	1.84883e-52	-1.88883	0.12	0.409	5.02991e-48
Efr3b	1.86093e-52	-2.29052	0.044	0.317	5.06285e-48
Stk39	2.02079e-52	1.90595	0.657	0.557	5.49776e-48
Rbfox3	2.51959e-52	-1.52598	0.163	0.456	6.85479e-48
Elovl7	2.6495e-52	-1.80207	0.08	0.368	7.20823e-48
Cdr1os	2.77941e-52	-2.03006	0.111	0.398	7.56167e-48
Robo2	3.56182e-52	-1.86224	0.18	0.46	9.69029e-48
Map2	3.66467e-52	-1.73126	0.18	0.473	9.97011e-48
Gpm6b	5.43397e-52	-1.35952	0.439	0.72	1.47837e-47
Gria4	1.17001e-51	-1.8328	0.144	0.43	3.18313e-47
Osbpl3	1.5915e-51	-1.79539	0.189	0.472	4.32983e-47
Cntn1	1.66569e-51	-1.81729	0.183	0.475	4.53168e-47
Kcnh8	2.75652e-51	-2.88668	0.067	0.333	7.49938e-47
Ank1	3.13056e-51	-2.05882	0.084	0.366	8.51699e-47
Hmgcr	5.16561e-51	-1.48627	0.121	0.423	1.40536e-46
Slc44a1	5.59679e-51	-1.19659	0.265	0.578	1.52266e-46
Fbxl2	5.67718e-51	-2.23723	0.056	0.325	1.54453e-46
Bicd1	7.52113e-51	-1.09163	0.303	0.62	2.0462e-46
Arhgap28	7.57605e-51	-1.76331	0.115	0.401	2.06114e-46
Ptprf	8.53498e-51	-1.03133	0.291	0.608	2.32203e-46
Syt1	9.83894e-51	-2.29596	0.26	0.512	2.67678e-46
Exoc6b	1.13381e-50	-1.15276	0.293	0.598	3.08465e-46
Lhfpl4	1.13598e-50	-1.62445	0.1	0.392	3.09055e-46
Rassf2	1.14977e-50	1.94864	0.289	0.117	3.12807e-46
Cep85l	1.2174e-50	-1.57514	0.148	0.448	3.31205e-46
Dgki	1.29145e-50	-3.08935	0.147	0.42	3.51351e-46
Atp8b1	1.453e-50	2.04682	0.22	0.074	3.95302e-46
Cobll1	1.91475e-50	1.26838	0.471	0.259	5.20926e-46
Rnf220	2.04555e-50	2.21667	0.505	0.355	5.56514e-46
Cracd	2.13891e-50	-1.4912	0.12	0.415	5.81911e-46
Gabrb3	2.79835e-50	-2.45319	0.059	0.324	7.61319e-46
Itga6	3.24378e-50	1.7973	0.503	0.324	8.82502e-46
Slc47a1	3.91548e-50	1.59353	0.187	0.055	1.06525e-45
Elavl3	4.65413e-50	-1.45092	0.167	0.461	1.2662e-45
Ptn	4.65663e-50	-1.37189	0.184	0.49	1.26688e-45
Gpam	6.30602e-50	-2.14977	0.116	0.396	1.71562e-45
Ppp1r14c	7.783e-50	-2.72438	0.071	0.333	2.11744e-45
Sox10	9.02316e-50	-3.26345	0.036	0.286	2.45484e-45
Grik4	1.09396e-49	-2.22563	0.109	0.38	2.97622e-45
Arfgef3	1.34257e-49	-1.65899	0.132	0.416	3.65259e-45
Gmds	1.35498e-49	1.44927	0.559	0.391	3.68636e-45
Ptgis	1.74108e-49	2.53904	0.139	0.034	4.73679e-45
Epb41l2	1.8331e-49	1.0348	0.663	0.487	4.98713e-45
Tenm3	2.34882e-49	-1.46857	0.32	0.606	6.39019e-45
Pard3b	2.60528e-49	0.805004	0.739	0.524	7.08792e-45
Mllt3	2.67505e-49	1.21992	0.676	0.559	7.27775e-45
Dgkh	3.06926e-49	-1.68097	0.431	0.667	8.35023e-45
Zdhhc14	5.53271e-49	-1.86704	0.112	0.396	1.50523e-44
Ankrd33b	6.17681e-49	2.58605	0.257	0.103	1.68046e-44
Srrm3	6.58014e-49	-2.03143	0.056	0.32	1.79019e-44
Add2	6.79241e-49	-1.69843	0.124	0.407	1.84794e-44
Map6	7.2923e-49	-1.39324	0.159	0.455	1.98394e-44
Kif3c	8.18045e-49	-1.32557	0.123	0.42	2.22557e-44
Frmpd1	8.19753e-49	-2.07895	0.055	0.318	2.23022e-44
Hoxc8	1.42945e-48	2.89586	0.273	0.118	3.88896e-44
Gm49678	1.47126e-48	-2.90584	0.065	0.319	4.00271e-44
Abca8b	1.73496e-48	-2.13841	0.167	0.445	4.72013e-44
Mdga2	1.80793e-48	-1.25317	0.336	0.602	4.91866e-44
Zfp36l1	2.34801e-48	1.6479	0.332	0.15	6.38799e-44
Adam22	2.95726e-48	-1.58967	0.157	0.442	8.04553e-44
Prdm16	3.14435e-48	-1.2184	0.284	0.593	8.55451e-44
Boc	3.67099e-48	2.32377	0.329	0.162	9.9873e-44
Emp1	4.94391e-48	2.42891	0.153	0.042	1.34504e-43
Syn2	6.00699e-48	-1.78292	0.097	0.371	1.63426e-43
Apc2	6.45077e-48	-1.78652	0.063	0.33	1.755e-43
Acss2	6.96436e-48	-1.59605	0.107	0.389	1.89472e-43
Rbm39	1.00203e-47	0.743274	0.825	0.794	2.72612e-43
Jph4	1.25383e-47	-1.88587	0.077	0.346	3.41118e-43
Cys1	1.32143e-47	2.74824	0.179	0.055	3.59507e-43
Piezo1	1.7184e-47	2.2533	0.197	0.064	4.67507e-43
Galnt14	1.94667e-47	-2.35794	0.043	0.291	5.29611e-43
Brsk2	2.02708e-47	-2.1749	0.041	0.293	5.51488e-43
Ap1s2	2.02935e-47	-1.52764	0.089	0.368	5.52106e-43
Ntrk2	2.3205e-47	-1.6967	0.18	0.461	6.31317e-43
Son	2.47108e-47	0.542828	0.933	0.906	6.72281e-43
Afap1	2.56819e-47	1.96095	0.447	0.282	6.98702e-43
Mapk4	2.8698e-47	-2.43804	0.085	0.345	7.80757e-43
Kif5a	2.93905e-47	-1.35154	0.299	0.576	7.99598e-43
Rab3c	3.28536e-47	-1.75717	0.123	0.397	8.93816e-43
Klf7	4.31022e-47	-0.845109	0.605	0.816	1.17264e-42
Etv4	4.41493e-47	2.64449	0.175	0.053	1.20113e-42
Slc6a6	5.0023e-47	1.96006	0.376	0.198	1.36092e-42
Rbfox1	5.5426e-47	-1.61068	0.664	0.79	1.50792e-42
Caskin1	5.81527e-47	-1.80594	0.064	0.327	1.5821e-42
Ttyh1	7.08329e-47	-2.60592	0.063	0.312	1.92708e-42
Hecw2	8.3335e-47	-2.10871	0.076	0.34	2.26721e-42
Car10	8.34842e-47	-2.72751	0.107	0.363	2.27127e-42
Ccser1	1.04947e-46	-2.22051	0.121	0.376	2.8552e-42
Cdh6	1.17965e-46	-2.25418	0.063	0.317	3.20936e-42
Dpp4	1.31233e-46	2.42577	0.113	0.025	3.57032e-42
Limch1	1.76029e-46	-1.59131	0.188	0.472	4.78905e-42
Hs3st5	1.92686e-46	-2.32184	0.068	0.318	5.24221e-42
Ap3b2	2.19365e-46	-1.6132	0.084	0.356	5.96803e-42
Cntn2	2.91178e-46	-1.87897	0.068	0.329	7.92178e-42
Lhfpl3	3.10355e-46	-2.4117	0.145	0.406	8.44352e-42
Atp8a2	3.50001e-46	-2.0303	0.168	0.435	9.52214e-42
Kazn	3.62474e-46	-1.79256	0.092	0.363	9.86147e-42
Trib2	4.29416e-46	1.7881	0.496	0.348	1.16827e-41
Mfsd6	4.45433e-46	-1.44136	0.099	0.376	1.21185e-41
Jakmip2	5.15576e-46	-2.0836	0.06	0.312	1.40268e-41
Gabra2	5.16982e-46	-2.43064	0.049	0.297	1.4065e-41
Synm	5.42317e-46	-1.53692	0.189	0.471	1.47543e-41
Pcdhac2	6.28398e-46	-1.53112	0.117	0.399	1.70962e-41
Rasgef1a	6.3596e-46	-1.8116	0.059	0.314	1.73019e-41
Otud7a	7.53948e-46	-2.53736	0.085	0.335	2.05119e-41
Ppp2r2c	8.37462e-46	-1.37271	0.124	0.405	2.2784e-41
A4galt	9.00391e-46	2.20209	0.344	0.178	2.4496e-41
Phf24	1.19586e-45	-1.58406	0.28	0.549	3.25346e-41
Syt11	1.22448e-45	-1.04356	0.427	0.711	3.33131e-41
Acsl4	1.50502e-45	-1.49523	0.071	0.332	4.09456e-41
Ncoa7	1.5538e-45	-1.12511	0.276	0.565	4.22727e-41
Ttc9	1.84033e-45	-1.62073	0.08	0.345	5.0068e-41
Thbs1	1.85751e-45	1.88238	0.127	0.031	5.05353e-41
Scd2	2.07292e-45	-0.996229	0.423	0.709	5.6396e-41
Megf10	2.24891e-45	-2.96491	0.047	0.284	6.11839e-41
A830018L16Rik	2.53919e-45	-2.37115	0.088	0.343	6.90813e-41
Scn10a	2.57287e-45	-2.1494	0.199	0.442	6.99976e-41
Carmil1	2.73274e-45	-1.32717	0.159	0.445	7.4347e-41
Kcnip3	2.97027e-45	-1.35766	0.147	0.431	8.08091e-41
D130043K22Rik	3.01494e-45	-2.00694	0.048	0.297	8.20244e-41
Gpd2	3.17245e-45	-1.64562	0.084	0.348	8.63098e-41
Spire2	3.21914e-45	-2.04757	0.049	0.296	8.75799e-41
Map4k4	3.23027e-45	-0.943695	0.341	0.659	8.78829e-41
Nfix	3.84458e-45	1.90199	0.351	0.177	1.04596e-40
Plce1	4.10703e-45	0.589413	0.717	0.461	1.11736e-40
Syn1	4.39019e-45	-1.36927	0.129	0.41	1.19439e-40
Art3	4.63632e-45	-2.19972	0.121	0.375	1.26136e-40
Pacsin1	4.73846e-45	-1.37509	0.148	0.427	1.28915e-40
Arhgap31	5.98629e-45	1.21773	0.608	0.466	1.62863e-40
Mapre2	6.71564e-45	-1.09863	0.349	0.649	1.82706e-40
Hacd4	8.45116e-45	2.37039	0.143	0.038	2.29922e-40
Gm26754	9.25453e-45	3.49136	0.151	0.043	2.51779e-40
Rufy3	9.29419e-45	-0.906787	0.391	0.668	2.52858e-40
Clk1	1.20139e-44	1.1289	0.659	0.557	3.26849e-40
Gdap1	1.24537e-44	-1.61	0.064	0.319	3.38816e-40
Spock1	1.59294e-44	-2.15363	0.105	0.36	4.33374e-40
Lin7a	1.71663e-44	-2.97876	0.033	0.266	4.67027e-40
Scn7a	1.78875e-44	-1.57373	0.184	0.463	4.86648e-40
Tox	1.9286e-44	-2.25729	0.103	0.351	5.24695e-40
Ctnna3	2.21436e-44	-2.36707	0.147	0.418	6.02439e-40
Ang	2.69371e-44	2.92523	0.129	0.033	7.32851e-40
C030017B01Rik	2.69699e-44	-2.17243	0.04	0.279	7.33742e-40
Bgn	2.7262e-44	2.06401	0.169	0.052	7.41689e-40
Cdh18	3.34022e-44	-2.39813	0.064	0.306	9.08739e-40
Hoxc9	3.74472e-44	2.74941	0.304	0.149	1.01879e-39
Me1	3.83175e-44	-1.15762	0.171	0.463	1.04247e-39
Adamtsl5	4.3084e-44	1.88466	0.288	0.125	1.17214e-39
Adgrg6	4.89289e-44	-2.28927	0.067	0.31	1.33116e-39
Mycbp2	6.02595e-44	-0.68825	0.577	0.801	1.63942e-39
Gfod1	7.20683e-44	-1.67053	0.085	0.343	1.96069e-39
Onecut2	7.45348e-44	-1.68556	0.085	0.343	2.02779e-39
Slc6a15	7.85456e-44	-2.22416	0.043	0.28	2.13691e-39
Syne1	7.92546e-44	-1.16483	0.288	0.56	2.1562e-39
Spire1	1.0307e-43	-1.1582	0.195	0.494	2.80412e-39
Tcp11l1	1.0879e-43	-1.16956	0.208	0.498	2.95975e-39
Axl	1.18945e-43	1.76704	0.272	0.114	3.23601e-39
Nwd2	1.27619e-43	-2.43334	0.073	0.317	3.472e-39
F3	1.72379e-43	1.92222	0.268	0.112	4.68974e-39
Rims3	1.75736e-43	-1.85999	0.048	0.288	4.78107e-39
Ptpn3	1.86e-43	-1.14527	0.159	0.442	5.06031e-39
Fry	1.87102e-43	-1.43423	0.208	0.479	5.09029e-39
Tbc1d9	2.10399e-43	-1.81943	0.059	0.304	5.72413e-39
Tmem117	2.15977e-43	-1.57056	0.121	0.387	5.87587e-39
Ica1	2.21997e-43	-2.04973	0.044	0.282	6.03965e-39
Khdrbs3	2.50108e-43	-2.69401	0.025	0.251	6.80443e-39
Mfhas1	2.84972e-43	-1.31887	0.113	0.381	7.75294e-39
Fat3	3.17326e-43	-2.85099	0.08	0.322	8.63316e-39
Asap3	3.60046e-43	2.21321	0.292	0.134	9.79541e-39
Tafa1	3.62553e-43	-2.82386	0.113	0.359	9.86361e-39
Mir124a-1hg	3.76924e-43	-2.59836	0.027	0.252	1.02546e-38
Il20rb	3.98408e-43	3.62151	0.119	0.029	1.08391e-38
Cers4	4.19834e-43	-0.91523	0.137	0.429	1.1422e-38
Fam219a	5.52569e-43	-0.9845	0.279	0.582	1.50332e-38
Pid1	6.23418e-43	0.733742	0.416	0.225	1.69607e-38
Cd302	7.51583e-43	2.58685	0.168	0.053	2.04476e-38
Tenm4	7.97643e-43	-2.25864	0.075	0.315	2.17007e-38
Ncald	1.14282e-42	-1.29105	0.155	0.432	3.10915e-38
Sned1	1.37735e-42	1.64809	0.427	0.255	3.74722e-38
Zswim6	1.40363e-42	-1.04495	0.301	0.604	3.81872e-38
Mapk10	1.44496e-42	-1.47733	0.208	0.468	3.93117e-38
Slc16a7	1.6616e-42	-2.33063	0.044	0.276	4.52054e-38
Fam171b	2.30534e-42	-1.28361	0.103	0.369	6.27192e-38
B4galt6	2.30678e-42	-1.49717	0.088	0.347	6.27583e-38
Gm1604a	2.62393e-42	-2.92927	0.021	0.241	7.13867e-38
Opcml	2.7584e-42	-2.18369	0.171	0.427	7.5045e-38
Mcf2l	4.26874e-42	-1.98721	0.044	0.278	1.16135e-37
Cerk	4.30917e-42	-1.27442	0.113	0.381	1.17235e-37
Cdh20	4.77174e-42	-3.293	0.036	0.256	1.2982e-37
Egfem1	5.0961e-42	-2.77543	0.092	0.325	1.38644e-37
Ivns1abp	5.53322e-42	-1.29263	0.131	0.404	1.50537e-37
Armh4	6.14271e-42	-1.62927	0.084	0.335	1.67119e-37
Adam11	7.75364e-42	-2.0523	0.055	0.29	2.10946e-37
Pakap	8.64241e-42	-2.12752	0.061	0.297	2.35125e-37
Sox6	1.09952e-41	-2.05842	0.147	0.388	2.99136e-37
Gab2	1.13424e-41	0.995519	0.648	0.512	3.08582e-37
Unc13a	1.38689e-41	-1.59066	0.052	0.289	3.77318e-37
Gpcpd1	1.54044e-41	-1.1761	0.204	0.495	4.19093e-37
Gm2115	1.55646e-41	-2.33148	0.049	0.279	4.2345e-37
Fign	2.21411e-41	-1.80558	0.211	0.459	6.02372e-37
Zfpm2	2.29302e-41	-1.93506	0.109	0.354	6.23839e-37
Mapk8ip1	2.77473e-41	-1.14522	0.144	0.419	7.54893e-37
Srrm1	3.57669e-41	1.03907	0.68	0.611	9.73075e-37
Hes1	3.62777e-41	2.04109	0.328	0.165	9.86971e-37
Zfp423	3.63613e-41	1.79181	0.447	0.291	9.89245e-37
Parm1	4.27574e-41	-1.33516	0.22	0.483	1.16326e-36
Acly	4.9025e-41	-1.13179	0.156	0.432	1.33378e-36
Crmp1	5.34827e-41	-1.45088	0.081	0.334	1.45505e-36
Asic2	8.50978e-41	-2.43343	0.225	0.467	2.31517e-36
Mast1	8.52304e-41	-1.56587	0.069	0.312	2.31878e-36
Gm1043	8.86731e-41	-2.3371	0.031	0.25	2.41244e-36
Pde4dip	9.01243e-41	-0.610769	0.205	0.469	2.45192e-36
Lrp1b	1.10682e-40	-2.34693	0.184	0.431	3.01122e-36
Jakmip1	1.17086e-40	-1.84505	0.056	0.289	3.18543e-36
Abca7	1.29612e-40	-1.57164	0.077	0.323	3.52621e-36
Fryl	1.38821e-40	-1.00088	0.372	0.654	3.77676e-36
Gfra1	1.44868e-40	-2.41931	0.091	0.333	3.94129e-36
Tmem131l	1.46048e-40	-1.80761	0.073	0.314	3.97338e-36
Sorbs2	1.63077e-40	-2.24372	0.133	0.374	4.43666e-36
Plcb1	1.84963e-40	-1.55045	0.291	0.558	5.03209e-36
Ptprr	2.16809e-40	-3.15452	0.052	0.272	5.89851e-36
Plxna4	2.40648e-40	-1.90952	0.12	0.364	6.54706e-36
Kitl	2.44728e-40	1.55596	0.401	0.235	6.65808e-36
Slco2a1	2.49327e-40	2.63062	0.237	0.1	6.78319e-36
Hspa12a	2.60849e-40	-0.901004	0.309	0.614	7.09667e-36
Marchf11	2.8403e-40	-2.77705	0.031	0.246	7.72733e-36
D130079A08Rik	2.89959e-40	-3.17493	0.067	0.3	7.88864e-36
Carmil3	3.10201e-40	-1.98968	0.047	0.273	8.43934e-36
Pcyt1b	3.45615e-40	-1.54966	0.072	0.314	9.40281e-36
Ndfip2	3.58573e-40	-1.09936	0.152	0.426	9.75534e-36
Cpne4	3.65287e-40	-2.17024	0.083	0.319	9.938e-36
Septin3	3.8e-40	-1.77542	0.068	0.306	1.03383e-35
Grm7	3.9024e-40	-2.4761	0.207	0.436	1.06169e-35
Prph	5.32643e-40	-1.16385	0.379	0.627	1.44911e-35
Adamts5	5.52489e-40	-2.20331	0.096	0.331	1.5031e-35
Prkar2b	5.60553e-40	-1.69076	0.099	0.345	1.52504e-35
Nrxn2	6.29422e-40	-1.16717	0.157	0.428	1.71241e-35
Htra3	6.3161e-40	2.40132	0.139	0.04	1.71836e-35
Lifr	6.6659e-40	-0.953628	0.405	0.658	1.81353e-35
Mirg	7.05178e-40	-2.67476	0.037	0.253	1.91851e-35
Slc36a1	7.19988e-40	-1.3817	0.128	0.384	1.9588e-35
Dmxl2	7.34683e-40	-1.06367	0.183	0.458	1.99878e-35
Ddhd1	8.58313e-40	-1.04386	0.333	0.622	2.33513e-35
Elapor2	9.19325e-40	-1.95087	0.06	0.291	2.50112e-35
Clip2	9.26648e-40	-1.05729	0.109	0.371	2.52104e-35
Aacs	9.35956e-40	-1.32563	0.081	0.326	2.54636e-35
Cpeb4	9.92876e-40	-1.06655	0.175	0.454	2.70122e-35
Pgm2l1	1.00961e-39	-1.16749	0.204	0.472	2.74674e-35
Cadm3	1.14169e-39	-1.34694	0.109	0.364	3.10609e-35
Bicdl1	1.31208e-39	-2.27297	0.039	0.258	3.56966e-35
Myzap	1.32184e-39	2.76207	0.173	0.059	3.59619e-35
Plp1	1.3978e-39	-1.25863	0.199	0.463	3.80285e-35
Snrpn	1.40134e-39	-1.03239	0.248	0.527	3.81248e-35
Pvt1	1.44664e-39	-2.03137	0.047	0.272	3.93572e-35
Acss1	1.64755e-39	-2.62047	0.04	0.255	4.48233e-35
C130071C03Rik	2.04975e-39	-2.77278	0.051	0.267	5.57656e-35
Lrp11	2.09162e-39	-1.61703	0.053	0.282	5.69046e-35
Agbl4	2.30259e-39	-2.12045	0.111	0.342	6.26444e-35
Dhcr24	2.34755e-39	-1.26527	0.145	0.409	6.38676e-35
Cdk14	2.46245e-39	-0.948508	0.341	0.605	6.69933e-35
Kit	2.50831e-39	-2.44843	0.055	0.273	6.82411e-35
Hs6st3	2.73151e-39	-2.54467	0.092	0.318	7.43135e-35
Kcna1	2.79002e-39	-1.74509	0.131	0.38	7.59054e-35
Pde5a	3.27517e-39	2.1765	0.197	0.072	8.91043e-35
Kcnc3	3.4599e-39	-1.72269	0.059	0.288	9.41301e-35
Syt7	3.64256e-39	-1.7245	0.144	0.387	9.90995e-35
Iqgap2	3.87496e-39	-2.36958	0.069	0.293	1.05422e-34
Fgfr1	4.0729e-39	0.959702	0.671	0.554	1.10807e-34
Kcnt1	4.21003e-39	-2.13536	0.045	0.265	1.14538e-34
Tafa5	4.29694e-39	-1.75109	0.109	0.35	1.16902e-34
Syngr1	4.36718e-39	-1.14331	0.107	0.362	1.18814e-34
Ttll7	5.29295e-39	-1.17995	0.404	0.625	1.44e-34
Sqle	5.69477e-39	-1.44157	0.092	0.337	1.54932e-34
Ndst3	5.83075e-39	-2.59046	0.031	0.241	1.58631e-34
Ackr1	6.54557e-39	-1.67576	0.048	0.272	1.78079e-34
Dok4	6.57792e-39	-1.30799	0.119	0.372	1.78959e-34
Isl1	7.02153e-39	-1.49324	0.073	0.31	1.91028e-34
Shank2	7.31543e-39	-2.92775	0.051	0.263	1.99024e-34
Rap1gap2	7.66719e-39	-1.47189	0.128	0.376	2.08594e-34
Pcdh10	8.10905e-39	-2.31547	0.049	0.266	2.20615e-34
Trpc1	8.36436e-39	-1.59336	0.045	0.266	2.27561e-34
Ksr2	9.47206e-39	-1.66355	0.088	0.325	2.57697e-34
Gria2	9.78831e-39	-2.73078	0.035	0.246	2.66301e-34
Snap25	1.02268e-38	-1.12227	0.355	0.586	2.78229e-34
Ube2e2	1.10231e-38	0.949103	0.639	0.489	2.99894e-34
Srsf5	1.24529e-38	0.985493	0.693	0.647	3.38793e-34
Gsap	1.25257e-38	-2.32137	0.063	0.281	3.40775e-34
Zmat4	1.27417e-38	-2.89707	0.063	0.28	3.46651e-34
Mmd2	1.32623e-38	-2.44079	0.068	0.287	3.60815e-34
Clmp	1.82799e-38	1.59097	0.395	0.234	4.97324e-34
Dpyd	1.93263e-38	-1.28145	0.272	0.528	5.25791e-34
Chka	1.9872e-38	-0.97783	0.193	0.466	5.40638e-34
Tmem132e	2.04689e-38	-1.66703	0.048	0.269	5.56876e-34
Bcan	2.10327e-38	-2.38013	0.061	0.278	5.72216e-34
Galnt17	2.12818e-38	-1.07174	0.347	0.592	5.78993e-34
Ogt	2.219e-38	1.12892	0.637	0.577	6.03701e-34
Negr1	2.29145e-38	-1.80905	0.104	0.341	6.23412e-34
Aig1	2.76613e-38	-1.09492	0.184	0.453	7.52553e-34
Sv2b	2.77383e-38	-1.80371	0.091	0.325	7.54649e-34
Sgpp2	2.87691e-38	-1.54139	0.076	0.309	7.82692e-34
Pfkp	3.26764e-38	-1.06529	0.163	0.426	8.88995e-34
Srebf2	3.28682e-38	-0.879637	0.199	0.484	8.94211e-34
Atl1	3.5434e-38	-1.15056	0.139	0.401	9.64017e-34
Mlxip	4.13057e-38	-2.07229	0.047	0.264	1.12376e-33
Sdk1	4.13456e-38	-1.37396	0.259	0.517	1.12485e-33
Grin1	4.25273e-38	-1.68209	0.051	0.273	1.157e-33
Abcg1	5.21821e-38	-1.79128	0.059	0.282	1.41967e-33
Prkcz	5.28961e-38	-1.42264	0.063	0.291	1.43909e-33
Samd4	6.60531e-38	1.41389	0.536	0.38	1.79704e-33
Lpin1	6.88593e-38	-1.12752	0.107	0.354	1.87339e-33
Gnao1	6.90616e-38	-1.10264	0.387	0.62	1.87889e-33
Ryr2	7.4941e-38	-2.19024	0.057	0.275	2.03885e-33
Mblac2	8.17385e-38	-1.16961	0.111	0.36	2.22378e-33
Cyp51	8.65314e-38	-1.29616	0.063	0.291	2.35417e-33
Paqr8	8.9303e-38	-1.52502	0.072	0.301	2.42958e-33
Xkr4	9.48927e-38	-1.4005	0.149	0.393	2.58165e-33
Nol4	1.05919e-37	-2.78975	0.024	0.225	2.88165e-33
Ablim1	1.08525e-37	-1.24925	0.217	0.473	2.95252e-33
Insc	1.09349e-37	-2.34976	0.041	0.251	2.97495e-33
Abi1	1.15093e-37	1.90035	0.615	0.551	3.13122e-33
Itprid2	1.33487e-37	-1.54871	0.092	0.326	3.63166e-33
Crppa	1.4339e-37	-1.25898	0.161	0.417	3.90107e-33
Lcp1	1.63997e-37	-1.51976	0.08	0.312	4.46169e-33
Cd44	1.66762e-37	-1.42885	0.149	0.394	4.53693e-33
Jmjd1c	1.71019e-37	1.08874	0.681	0.601	4.65275e-33
Arhgap22	1.74552e-37	-2.38817	0.031	0.236	4.74885e-33
Khdrbs2	1.76892e-37	-3.11722	0.049	0.256	4.81252e-33
Bin1	1.78576e-37	-1.20628	0.112	0.364	4.85833e-33
Mpdz	1.81031e-37	-1.01754	0.2	0.477	4.92513e-33
Lgr4	1.82227e-37	-1.65455	0.205	0.453	4.95768e-33
Herc3	1.94873e-37	-1.15333	0.093	0.334	5.30171e-33
Akt3	2.34611e-37	-0.780645	0.364	0.653	6.38282e-33
Ggt7	2.39963e-37	-1.44354	0.059	0.283	6.52842e-33
Lhfp	2.75007e-37	-1.69578	0.185	0.422	7.48183e-33
Nckap5	2.85235e-37	-2.41814	0.085	0.304	7.76012e-33
Tmcc3	2.89629e-37	-1.66754	0.107	0.343	7.87965e-33
Ccdc85a	3.06186e-37	-1.71891	0.137	0.366	8.33011e-33
Sc5d	3.20372e-37	-1.1624	0.089	0.329	8.71603e-33
Megf9	3.32446e-37	-1.06859	0.236	0.514	9.04453e-33
Sacs	3.38775e-37	-1.31291	0.099	0.339	9.21671e-33
Bsn	4.00767e-37	-1.45412	0.065	0.291	1.09033e-32
Sgcz	4.09255e-37	-2.6296	0.232	0.454	1.11342e-32
Necab1	4.14154e-37	-1.85889	0.077	0.3	1.12675e-32
Arhgap29	4.22015e-37	1.6554	0.343	0.184	1.14814e-32
Abr	4.50622e-37	-1.06375	0.195	0.466	1.22596e-32
Slc7a14	5.32069e-37	-1.40729	0.068	0.294	1.44755e-32
Mamld1	5.39336e-37	-1.39132	0.065	0.294	1.46732e-32
Nrg2	5.66197e-37	-1.8605	0.052	0.268	1.5404e-32
Emb	5.70865e-37	-1.28987	0.119	0.363	1.55309e-32
Nipal3	5.98376e-37	-1.1599	0.16	0.417	1.62794e-32
Gria3	6.12168e-37	-1.28936	0.201	0.451	1.66547e-32
Lgi1	6.62923e-37	-1.42719	0.103	0.341	1.80355e-32
Spock2	6.86839e-37	-1.19477	0.341	0.58	1.86861e-32
Bmerb1	7.06884e-37	-1.0989	0.075	0.308	1.92315e-32
Kcnma1	7.1452e-37	-0.85841	0.172	0.421	1.94392e-32
Kcnq2	7.23659e-37	-2.22599	0.032	0.236	1.96879e-32
Syt14	7.25414e-37	-3.03865	0.017	0.21	1.97356e-32
Afdn	8.07847e-37	1.62027	0.488	0.367	2.19783e-32
Gpr158	8.20276e-37	-1.94554	0.096	0.321	2.23164e-32
Xkr6	8.25273e-37	-1.63115	0.104	0.335	2.24524e-32
Phactr3	8.65074e-37	-2.14668	0.029	0.231	2.35352e-32
Lgr5	9.08047e-37	-3.27214	0.039	0.237	2.47043e-32
Bmp7	9.90442e-37	2.32217	0.169	0.059	2.6946e-32
Acsbg1	1.36631e-36	-2.11307	0.068	0.279	3.71718e-32
Rit2	1.50856e-36	-1.80211	0.051	0.262	4.10418e-32
Nrp2	1.62415e-36	1.43194	0.479	0.325	4.41866e-32
Cdh10	1.88407e-36	-2.4269	0.052	0.259	5.12581e-32
Pcnx2	1.89926e-36	-1.62573	0.041	0.251	5.16713e-32
Dop1b	2.02973e-36	-0.922279	0.141	0.403	5.52208e-32
Madd	2.12828e-36	-1.27695	0.071	0.297	5.79019e-32
Etnk1	2.23531e-36	-0.808424	0.353	0.633	6.08138e-32
Slc66a2	2.50208e-36	-1.17202	0.071	0.299	6.80717e-32
Gas2l3	2.7584e-36	-2.76779	0.04	0.241	7.50449e-32
Clgn	3.19975e-36	-1.03324	0.08	0.312	8.70525e-32
Rtn4rl1	3.41663e-36	-1.57632	0.061	0.279	9.29529e-32
Jazf1	4.08828e-36	-2.17449	0.052	0.26	1.11226e-31
Rbpms	4.49638e-36	1.48035	0.288	0.137	1.22329e-31
Jakmip3	4.80067e-36	-2.6095	0.02	0.212	1.30607e-31
Wasf1	4.96015e-36	-1.70793	0.037	0.243	1.34946e-31
Vstm5	5.06273e-36	-1.9675	0.031	0.23	1.37737e-31
Ralgps1	5.08893e-36	-1.2445	0.119	0.362	1.38449e-31
Strbp	5.41863e-36	1.1086	0.596	0.478	1.47419e-31
Dpp10	5.99808e-36	-2.30852	0.232	0.457	1.63184e-31
Mid2	6.18932e-36	-1.06577	0.084	0.315	1.68387e-31
Coro2a	6.69229e-36	-1.29291	0.084	0.314	1.8207e-31
Fbln2	7.16352e-36	-2.11065	0.073	0.285	1.94891e-31
Tbc1d30	7.28391e-36	-2.62993	0.016	0.205	1.98166e-31
Osbpl10	7.37038e-36	-1.69037	0.073	0.296	2.00519e-31
Epb41	7.37353e-36	-1.30813	0.184	0.434	2.00604e-31
Gm35501	7.75372e-36	-3.00429	0.019	0.207	2.10948e-31
Lrig1	8.69141e-36	1.97596	0.275	0.132	2.36459e-31
Plcxd3	8.99899e-36	-1.58211	0.059	0.268	2.44827e-31
Dscam	9.23387e-36	-2.03818	0.077	0.295	2.51217e-31
Cdk19	9.50094e-36	-1.08339	0.195	0.455	2.58483e-31
Prdm12	1.00309e-35	-1.67937	0.065	0.28	2.72902e-31
Ogfrl1	1.2089e-35	-1.19175	0.117	0.359	3.28892e-31
Nr6a1	1.25827e-35	-0.929379	0.297	0.561	3.42325e-31
Dok6	1.31266e-35	-1.19445	0.117	0.358	3.57123e-31
Ebf3	1.58294e-35	-1.46595	0.095	0.321	4.30654e-31
Fam171a1	1.61536e-35	-1.30027	0.132	0.373	4.39474e-31
Fgf7	1.80732e-35	2.5661	0.151	0.05	4.91698e-31
Tspan15	2.01347e-35	-2.49772	0.04	0.238	5.47783e-31
Snx7	2.06075e-35	-1.07896	0.161	0.414	5.60647e-31
Scamp5	2.06947e-35	-1.17302	0.075	0.3	5.6302e-31
Gm16083	2.4225e-35	-1.38461	0.091	0.32	6.59065e-31
Cttnbp2nl	2.48116e-35	-1.40926	0.115	0.346	6.75024e-31
Sgsm1	2.56188e-35	-2.62205	0.015	0.2	6.96986e-31
Rundc3a	2.72595e-35	-1.09413	0.088	0.32	7.41621e-31
Jam3	3.1178e-35	-1.51969	0.091	0.316	8.48229e-31
Cd59a	3.18388e-35	-1.1705	0.092	0.319	8.66207e-31
Ahcyl2	3.34963e-35	1.29876	0.557	0.452	9.11299e-31
Nova2	3.9165e-35	-2.67784	0.015	0.199	1.06552e-30
Tcf7l1	4.12255e-35	-1.86738	0.151	0.37	1.12158e-30
Med12l	4.934e-35	-1.1142	0.115	0.353	1.34234e-30
4933406I18Rik	6.34255e-35	-2.59309	0.028	0.219	1.72555e-30
Rnf180	6.43323e-35	-2.06837	0.043	0.244	1.75022e-30
Disp2	6.68896e-35	-1.29972	0.067	0.284	1.8198e-30
Mertk	6.99432e-35	-2.0635	0.105	0.316	1.90288e-30
Slc2a1	6.99794e-35	2.45239	0.257	0.124	1.90386e-30
Sap25	7.17054e-35	2.11752	0.273	0.134	1.95082e-30
Lss	7.44546e-35	-1.8388	0.04	0.241	2.02561e-30
Fasn	7.87152e-35	-1.27598	0.113	0.346	2.14152e-30
Ephx1	8.47501e-35	2.18515	0.333	0.194	2.30571e-30
Epha5	8.72273e-35	-2.67385	0.045	0.243	2.37311e-30
Sorl1	9.28781e-35	-1.39342	0.173	0.416	2.52684e-30
Magi2	9.41825e-35	-0.860372	0.52	0.729	2.56233e-30
Pacrg	9.51097e-35	-1.32477	0.073	0.291	2.58756e-30
Slc1a4	1.07351e-34	-1.96195	0.037	0.236	2.92059e-30
Slc17a6	1.11203e-34	-1.25672	0.073	0.294	3.0254e-30
Tef	1.20554e-34	1.43583	0.524	0.418	3.27979e-30
Actr3b	1.28076e-34	-1.51515	0.049	0.255	3.48444e-30
Gpc5	1.32045e-34	-2.41258	0.068	0.273	3.59243e-30
Septin6	1.32517e-34	2.06817	0.413	0.282	3.60527e-30
Zfp827	1.34968e-34	-1.63333	0.04	0.24	3.67193e-30
Rnf150	1.36268e-34	-1.58536	0.068	0.282	3.7073e-30
Astn1	1.43734e-34	-1.62531	0.056	0.264	3.91044e-30
Cyp2d22	1.4705e-34	1.73418	0.229	0.097	4.00064e-30
Lmntd1	1.47921e-34	3.16988	0.127	0.038	4.02434e-30
Tnk2	1.57948e-34	-0.977637	0.093	0.327	4.29714e-30
Hmbox1	1.67437e-34	-0.975596	0.289	0.545	4.5553e-30
Zcchc18	1.67462e-34	-1.00234	0.111	0.353	4.55597e-30
Prkar1b	1.87578e-34	-1.00942	0.172	0.425	5.10326e-30
Kcnab2	1.88164e-34	-1.00987	0.235	0.494	5.11919e-30
Evl	1.89884e-34	-1.01524	0.119	0.359	5.16599e-30
Shc4	2.08178e-34	-3.21794	0.041	0.232	5.6637e-30
Slc6a17	2.08252e-34	-1.83873	0.055	0.26	5.6657e-30
Cyrib	2.12055e-34	-1.03536	0.169	0.424	5.76918e-30
Fdps	2.47083e-34	-0.889204	0.18	0.444	6.72215e-30
Wwtr1	2.64456e-34	1.24603	0.405	0.237	7.1948e-30
Casz1	2.87433e-34	-1.71173	0.108	0.325	7.81989e-30
Erbb3	3.05851e-34	-2.82424	0.04	0.23	8.32099e-30
Scn11a	3.28061e-34	-1.59242	0.137	0.362	8.92522e-30
Garnl3	3.37664e-34	-1.25079	0.221	0.457	9.18648e-30
2610035D17Rik	3.69361e-34	-1.39419	0.243	0.48	1.00488e-29
Pgbd5	3.84518e-34	-2.04563	0.021	0.206	1.04612e-29
Cyp2j6	3.92775e-34	-2.36304	0.04	0.234	1.06858e-29
Lrp1	4.07312e-34	1.21177	0.52	0.393	1.10813e-29
Sulf2	4.33924e-34	1.88184	0.337	0.19	1.18053e-29
Pcdh17	4.52533e-34	-1.92141	0.071	0.278	1.23116e-29
Clvs1	4.81119e-34	-2.54309	0.025	0.212	1.30893e-29
Cntnap5a	4.81556e-34	-1.95186	0.085	0.3	1.31012e-29
Srsf11	4.96961e-34	1.03215	0.649	0.599	1.35203e-29
Cdkl2	5.02866e-34	-1.34956	0.076	0.295	1.3681e-29
Ncoa3	5.59656e-34	1.63355	0.455	0.327	1.5226e-29
Kcnn2	5.70844e-34	-2.78053	0.029	0.216	1.55304e-29
Myt1	6.31717e-34	-2.79679	0.023	0.206	1.71865e-29
Zfp804a	6.33763e-34	-1.85148	0.055	0.255	1.72422e-29
Macrod2	6.54885e-34	-1.15739	0.435	0.635	1.78168e-29
Pld5	7.06273e-34	-1.75598	0.076	0.286	1.92149e-29
Rab6b	7.08871e-34	-0.90795	0.368	0.618	1.92856e-29
Atp2b2	8.89536e-34	-1.66227	0.099	0.313	2.42007e-29
Sytl2	9.0909e-34	-1.68983	0.047	0.245	2.47327e-29
Rtn4	9.76381e-34	-0.722805	0.532	0.761	2.65634e-29
Pirt	9.83182e-34	-1.1685	0.209	0.453	2.67484e-29
Pla2g7	1.00553e-33	-1.15416	0.145	0.383	2.73564e-29
Pde4b	1.0412e-33	-1.72265	0.108	0.325	2.83269e-29
Gm4876	1.17434e-33	2.1566	0.183	0.07	3.1949e-29
Myo16	1.1813e-33	-2.46288	0.055	0.248	3.21384e-29
Wdfy2	1.19004e-33	-0.939414	0.22	0.486	3.23762e-29
Miga1	1.20979e-33	-1.07577	0.092	0.317	3.29134e-29
Spock3	1.22755e-33	-1.93755	0.076	0.283	3.33968e-29
Gpr137c	1.25259e-33	-1.60611	0.059	0.264	3.40779e-29
Evi5	1.29488e-33	-0.769579	0.281	0.548	3.52285e-29
Tmtc1	1.33866e-33	1.16367	0.585	0.458	3.64196e-29
Prkacb	1.63144e-33	-0.800746	0.176	0.429	4.43849e-29
Mmp24	1.68977e-33	-2.53362	0.023	0.205	4.59718e-29
Ogn	1.7797e-33	0.806105	0.283	0.13	4.84186e-29
Irak3	1.81472e-33	2.41419	0.203	0.084	4.93712e-29
Lrp8	1.85298e-33	-1.91389	0.032	0.222	5.04121e-29
Ret	1.95262e-33	-1.39472	0.121	0.35	5.3123e-29
Kcnh1	2.04007e-33	-1.76274	0.072	0.28	5.5502e-29
Arhgef10l	2.0409e-33	-0.9203	0.152	0.398	5.55247e-29
Arhgef4	2.28037e-33	-2.30782	0.032	0.22	6.20398e-29
Fbln5	2.70347e-33	-2.39879	0.065	0.26	7.35506e-29
Agap1	3.09982e-33	-0.829834	0.377	0.646	8.43336e-29
Ttbk1	3.24626e-33	-1.61118	0.039	0.233	8.83179e-29
Serinc5	3.49047e-33	-1.24573	0.108	0.333	9.49618e-29
St6galnac3	3.52338e-33	-1.87631	0.1	0.31	9.5857e-29
Nid1	3.90145e-33	1.46586	0.364	0.208	1.06143e-28
Cabp1	4.12908e-33	-1.16158	0.105	0.331	1.12336e-28
Uhmk1	4.16717e-33	-1.16255	0.14	0.377	1.13372e-28
Ccdc92	4.39557e-33	-1.00004	0.153	0.396	1.19586e-28
Klhl32	4.69194e-33	-1.86404	0.043	0.234	1.27649e-28
Mctp1	4.74841e-33	-1.74975	0.075	0.281	1.29185e-28
Abca5	5.11199e-33	-1.28067	0.093	0.312	1.39077e-28
Atp1a1	5.58488e-33	-1.05325	0.468	0.682	1.51942e-28
Meg3	5.60122e-33	-2.2336	0.701	0.782	1.52387e-28
Dlgap3	6.4305e-33	-1.41232	0.032	0.22	1.74948e-28
Hspa4l	6.5111e-33	-0.890171	0.175	0.426	1.77141e-28
Rnf112	6.74451e-33	-1.798	0.047	0.242	1.83491e-28
Zswim5	6.76771e-33	-1.59836	0.048	0.246	1.84122e-28
Klhl3	6.76854e-33	-1.94355	0.031	0.216	1.84145e-28
Oprm1	7.05876e-33	-2.08619	0.067	0.265	1.92041e-28
Brinp2	7.18146e-33	-2.2182	0.035	0.221	1.95379e-28
Kif3a	7.35371e-33	-0.887937	0.187	0.442	2.00065e-28
Pak1	7.89595e-33	-1.61226	0.071	0.277	2.14817e-28
Wipf3	7.9622e-33	-1.64826	0.084	0.292	2.1662e-28
Ttc39c	1.0638e-32	-1.2942	0.063	0.269	2.89418e-28
Acin1	1.06829e-32	1.02817	0.644	0.595	2.90639e-28
Rhobtb3	1.15543e-32	-1.19565	0.109	0.333	3.14346e-28
Mgat4a	1.1592e-32	-1.45886	0.057	0.26	3.15373e-28
Gm43376	1.16872e-32	-3.75233	0.007	0.174	3.17962e-28
Tns1	1.23415e-32	1.10221	0.619	0.54	3.35764e-28
Dusp15	1.23635e-32	-2.52643	0.035	0.22	3.3636e-28
Sema4d	1.53187e-32	-1.18603	0.067	0.273	4.1676e-28
Map1b	1.59048e-32	-1.2051	0.885	0.94	4.32705e-28
Nedd9	1.61689e-32	-2.08111	0.061	0.259	4.3989e-28
Pde3b	1.97637e-32	-2.22438	0.036	0.221	5.37691e-28
Prnp	2.00738e-32	-0.918462	0.183	0.433	5.46127e-28
Pcsk2	2.01242e-32	-1.2316	0.247	0.472	5.47498e-28
Tspan7	2.19129e-32	-0.822332	0.176	0.43	5.96163e-28
Gpr45	2.36275e-32	-1.54763	0.032	0.218	6.4281e-28
Igsf9b	2.38887e-32	-1.32509	0.057	0.258	6.49915e-28
Entpd3	2.64576e-32	-1.30385	0.055	0.254	7.19805e-28
Srrm4	2.78716e-32	-2.50906	0.025	0.203	7.58274e-28
Itpk1	2.95455e-32	-1.02069	0.137	0.374	8.03815e-28
Adamtsl4	3.13727e-32	2.15042	0.185	0.074	8.53526e-28
Adipor2	3.19207e-32	-1.18468	0.157	0.392	8.68435e-28
Crip2	3.20066e-32	-0.847893	0.176	0.427	8.70772e-28
Fads6	3.24918e-32	-1.88698	0.047	0.236	8.83971e-28
Cds1	3.29346e-32	-2.20805	0.031	0.213	8.96019e-28
Lrrn1	3.39535e-32	-1.36483	0.115	0.334	9.2374e-28
Dync1i1	3.48304e-32	-1.34257	0.223	0.441	9.47596e-28
Faxc	3.97358e-32	-1.38415	0.032	0.216	1.08105e-27
Folh1	4.03236e-32	-2.43004	0.033	0.216	1.09704e-27
Lin28b	4.15975e-32	-1.7469	0.039	0.228	1.1317e-27
Cxxc4	4.40213e-32	-1.6307	0.021	0.199	1.19764e-27
Slc35f4	5.06771e-32	-2.17094	0.045	0.233	1.37872e-27
Hey2	5.10198e-32	-2.37748	0.047	0.233	1.38805e-27
Slc22a23	5.32868e-32	-1.61774	0.069	0.273	1.44972e-27
Nap1l5	5.44325e-32	-0.80275	0.116	0.349	1.48089e-27
Dach1	5.61088e-32	-3.02508	0.029	0.207	1.5265e-27
Vat1l	5.88804e-32	-1.64096	0.113	0.328	1.6019e-27
Plekhm3	6.68505e-32	-0.97704	0.217	0.458	1.81874e-27
Mapk8ip2	7.01175e-32	-1.01597	0.153	0.392	1.90762e-27
Id4	7.18002e-32	-1.29333	0.079	0.287	1.9534e-27
Pip4k2a	7.33313e-32	-1.11383	0.155	0.395	1.99505e-27
Dync1i2	8.56951e-32	-0.701114	0.564	0.743	2.33142e-27
A330102I10Rik	8.6716e-32	-2.12308	0.036	0.219	2.3592e-27
Tcerg1l	8.67328e-32	-2.54946	0.028	0.205	2.35965e-27
Nlgn1	8.69079e-32	-1.14392	0.227	0.462	2.36441e-27
Nacc2	8.83022e-32	-0.850141	0.26	0.521	2.40235e-27
Vwa5a	1.01027e-31	-1.03029	0.161	0.4	2.74854e-27
Hsbp1l1	1.03558e-31	-1.66828	0.044	0.234	2.81739e-27
Lrrc8b	1.14884e-31	-1.639	0.061	0.257	3.12553e-27
Insig1	1.16733e-31	-1.24244	0.063	0.262	3.17584e-27
Pdgfra	1.22505e-31	1.93354	0.14	0.047	3.33288e-27
Sertad2	1.24318e-31	-1.02454	0.156	0.391	3.38219e-27
Kcnt2	1.36919e-31	1.31567	0.296	0.151	3.72501e-27
Adgrg1	1.41716e-31	-1.30813	0.06	0.259	3.85553e-27
Pde1c	1.47648e-31	-1.77032	0.109	0.317	4.0169e-27
Rph3a	1.63901e-31	-1.1623	0.161	0.392	4.45908e-27
Filip1	1.81715e-31	-1.78535	0.101	0.309	4.94373e-27
Rrbp1	1.95697e-31	1.09249	0.583	0.485	5.32414e-27
Ric3	2.03486e-31	-1.59667	0.04	0.226	5.53603e-27
Elmo1	2.0387e-31	-1.30822	0.24	0.48	5.54649e-27
Klhl5	2.11591e-31	-1.26195	0.121	0.338	5.75654e-27
Spon1	2.41286e-31	-2.74142	0.039	0.217	6.56442e-27
Lingo2	2.57499e-31	-2.35516	0.212	0.422	7.00551e-27
Kif26b	2.59478e-31	-1.83525	0.088	0.287	7.05937e-27
Amer2	2.68203e-31	-1.26098	0.048	0.241	7.29674e-27
Ece2	3.1244e-31	-1.34872	0.057	0.253	8.50025e-27
Lgi4	3.2667e-31	-1.98645	0.083	0.277	8.8874e-27
Dner	3.38962e-31	-1.39654	0.079	0.281	9.2218e-27
Ralgapa1	3.46387e-31	-0.72689	0.416	0.676	9.42382e-27
Itpr1	3.49149e-31	1.35315	0.425	0.287	9.49894e-27
Dip2b	3.55018e-31	-0.785159	0.355	0.624	9.65861e-27
Fbxw7	3.66308e-31	-0.747892	0.219	0.471	9.96578e-27
Gjc3	3.66388e-31	-2.82448	0.029	0.202	9.96794e-27
Rell1	3.72185e-31	1.63578	0.344	0.202	1.01257e-26
Rgs3	4.21663e-31	-1.13823	0.112	0.331	1.14718e-26
Scg5	4.37321e-31	-0.967824	0.093	0.311	1.18978e-26
Abhd17b	4.39187e-31	-0.902536	0.164	0.402	1.19485e-26
Lama2	4.6495e-31	0.521729	0.704	0.504	1.26494e-26
Wnk2	5.95946e-31	-1.32416	0.053	0.245	1.62133e-26
Sema4b	6.00587e-31	-1.17856	0.113	0.332	1.63396e-26
Slmap	6.15621e-31	1.13828	0.58	0.527	1.67486e-26
Lrrtm3	6.18902e-31	-3.07385	0.023	0.192	1.68378e-26
Pde2a	6.22055e-31	-1.4338	0.061	0.258	1.69236e-26
Ugcg	6.42771e-31	-1.25829	0.089	0.297	1.74872e-26
Celsr2	6.90722e-31	-1.88126	0.036	0.216	1.87918e-26
9530077C05Rik	7.20165e-31	-1.4923	0.043	0.227	1.95928e-26
Stard4	7.54804e-31	-1.8577	0.033	0.212	2.05352e-26
Mtpn	8.03999e-31	-0.945803	0.136	0.365	2.18736e-26
Plekha1	8.18756e-31	-0.870775	0.128	0.356	2.22751e-26
B830012L14Rik	8.35254e-31	-2.17534	0.055	0.24	2.27239e-26
Cacnb3	8.85951e-31	-0.90082	0.109	0.333	2.41032e-26
Eps15	9.72979e-31	-0.697364	0.287	0.553	2.64709e-26
Cobl	9.85825e-31	1.29467	0.543	0.436	2.68203e-26
Idi1	1.0546e-30	-1.13824	0.079	0.283	2.86913e-26
Luc7l3	1.09547e-30	1.12307	0.639	0.605	2.98035e-26
Reep2	1.12662e-30	-1.0277	0.071	0.272	3.06509e-26
Htra1	1.14227e-30	-1.57248	0.057	0.248	3.10767e-26
Trim67	1.21938e-30	-1.4051	0.041	0.225	3.31746e-26
Parvb	1.29748e-30	-1.32364	0.068	0.266	3.52992e-26
Klf3	1.3469e-30	1.76188	0.423	0.298	3.66437e-26
Gsdmd	1.38348e-30	2.25488	0.104	0.029	3.7639e-26
Samd5	1.40888e-30	-3.03949	0.017	0.182	3.83301e-26
Vegfa	1.46129e-30	-1.05675	0.085	0.291	3.97558e-26
Dse	1.46781e-30	2.00911	0.291	0.159	3.99334e-26
Acsl6	1.50089e-30	-1.0671	0.075	0.276	4.08333e-26
Trpv2	1.50415e-30	-1.39875	0.048	0.235	4.09218e-26
Bend6	1.54884e-30	-1.11163	0.067	0.264	4.21377e-26
Nrip3	1.60587e-30	-1.47736	0.071	0.268	4.36894e-26
Mctp2	1.64836e-30	-2.40034	0.037	0.215	4.48452e-26
Iqsec3	1.74862e-30	-2.97541	0.011	0.171	4.7573e-26
Trarg1	1.86532e-30	-1.20639	0.196	0.427	5.07478e-26
Ano6	2.1348e-30	0.949864	0.603	0.518	5.80793e-26
Tmod1	2.23585e-30	-0.913696	0.115	0.338	6.08284e-26
Tshz2	2.35829e-30	0.340821	0.828	0.665	6.41596e-26
Cpne2	2.47063e-30	-1.13048	0.081	0.285	6.72158e-26
Ddah1	2.54396e-30	-1.3625	0.068	0.264	6.92111e-26
Rarb	2.57302e-30	1.50691	0.391	0.245	7.00016e-26
Snph	2.96993e-30	-1.11766	0.093	0.303	8.07999e-26
Cep126	3.03372e-30	-1.40514	0.044	0.227	8.25353e-26
Basp1	3.1198e-30	-1.17625	0.125	0.343	8.48772e-26
Sult4a1	3.14897e-30	-0.928004	0.205	0.447	8.5671e-26
Fgf13	3.30509e-30	-0.988278	0.259	0.498	8.99182e-26
Erich3	3.61759e-30	-1.45598	0.028	0.2	9.84201e-26
Stac	3.68576e-30	-2.74597	0.039	0.213	1.00275e-25
Gnal	3.81159e-30	-1.17221	0.208	0.435	1.03698e-25
Dgkz	3.97183e-30	-1.1957	0.303	0.521	1.08058e-25
Adra1b	4.03925e-30	3.11526	0.1	0.028	1.09892e-25
Rassf5	4.07759e-30	-1.35132	0.04	0.221	1.10935e-25
Ccdc80	4.16983e-30	2.74105	0.127	0.041	1.13444e-25
Arhgap10	4.22754e-30	1.14927	0.361	0.21	1.15015e-25
Col4a4	5.37175e-30	2.4918	0.184	0.077	1.46144e-25
Smarca1	5.73571e-30	-1.07367	0.052	0.241	1.56046e-25
Gnai1	6.20298e-30	-1.37995	0.085	0.285	1.68758e-25
Ckap5	6.51682e-30	-0.783692	0.277	0.533	1.77297e-25
Serpini1	6.56657e-30	-1.51667	0.055	0.242	1.7865e-25
Acpp	6.57992e-30	-1.6362	0.099	0.297	1.79013e-25
Gpr137b	6.71487e-30	-1.18324	0.077	0.276	1.82685e-25
Rimkla	6.90024e-30	-1.4144	0.04	0.22	1.87728e-25
Tmem150c	7.10015e-30	-1.37069	0.045	0.229	1.93167e-25
Kcnc2	7.69444e-30	-3.01491	0.031	0.199	2.09335e-25
Gnb4	7.75199e-30	-1.4084	0.075	0.269	2.10901e-25
Hoxb3	7.86908e-30	2.08157	0.26	0.133	2.14086e-25
Cds2	7.93091e-30	-1.00441	0.243	0.478	2.15768e-25
9430041J12Rik	7.97523e-30	-3.45635	0.024	0.187	2.16974e-25
Fam189b	8.77548e-30	-0.908649	0.211	0.447	2.38746e-25
Igfbp4	9.91525e-30	1.57558	0.303	0.164	2.69754e-25
Rbfox2	9.91636e-30	0.692138	0.715	0.639	2.69784e-25
Gabrg2	1.00565e-29	-1.56012	0.029	0.201	2.73597e-25
Syt9	1.02574e-29	-1.85088	0.075	0.262	2.79062e-25
Ppp4r4	1.036e-29	-2.05057	0.023	0.189	2.81853e-25
Fads2	1.2068e-29	-0.970332	0.184	0.419	3.28321e-25
Cacna2d2	1.24326e-29	-2.52327	0.029	0.197	3.38243e-25
Slc41a2	1.39863e-29	-1.43501	0.051	0.235	3.8051e-25
Mcc	1.43032e-29	-1.3917	0.105	0.311	3.89134e-25
Nav2	1.55871e-29	-2.69194	0.015	0.174	4.24064e-25
Nacad	1.5938e-29	-0.960882	0.104	0.315	4.33609e-25
Marchf4	1.65937e-29	-3.20606	0.007	0.16	4.51448e-25
Bean1	1.69627e-29	-0.98405	0.107	0.32	4.61488e-25
4930588A03Rik	1.71539e-29	-2.58234	0.032	0.201	4.66689e-25
Ksr1	1.74453e-29	-0.970286	0.167	0.393	4.74617e-25
Gm42722	1.90067e-29	-3.66365	0.007	0.159	5.17097e-25
Arpp21	1.92642e-29	-2.60642	0.037	0.207	5.24101e-25
Ppfia4	1.97497e-29	-1.55297	0.028	0.198	5.37312e-25
Prkab2	2.53317e-29	-0.762925	0.115	0.333	6.89175e-25
Nalf1	2.64611e-29	-1.72973	0.131	0.325	7.19902e-25
Galnt18	2.69556e-29	-1.0403	0.215	0.441	7.33355e-25
Kcnq5	2.72632e-29	-1.92354	0.101	0.294	7.41723e-25
Msn	2.83582e-29	-0.765174	0.215	0.462	7.71512e-25
Zfp664	2.92416e-29	-0.838721	0.12	0.339	7.95546e-25
Apba2	3.19035e-29	-1.28199	0.044	0.223	8.67967e-25
Nxpe3	3.55198e-29	-1.45036	0.041	0.218	9.66353e-25
Atp13a2	3.76772e-29	-0.84316	0.095	0.303	1.02504e-24
Rasa3	3.8395e-29	-1.41614	0.14	0.344	1.04457e-24
Mapre3	3.87228e-29	-0.68274	0.187	0.432	1.05349e-24
Dgkg	3.9836e-29	-2.03911	0.069	0.252	1.08378e-24
Svip	4.34006e-29	-1.02771	0.077	0.275	1.18076e-24
Myh14	4.34362e-29	-1.21236	0.063	0.253	1.18173e-24
Prkag2	4.67217e-29	-0.641947	0.181	0.421	1.27111e-24
Apba1	4.74209e-29	-0.98594	0.3	0.526	1.29013e-24
Nyap1	4.80909e-29	-0.996241	0.067	0.259	1.30836e-24
Tspan14	5.08209e-29	-1.03541	0.132	0.345	1.38263e-24
St8sia1	5.27841e-29	-1.86017	0.035	0.206	1.43605e-24
Scrn1	5.48774e-29	-0.990191	0.084	0.287	1.49299e-24
Atcay	6.25156e-29	-0.801762	0.063	0.255	1.7008e-24
Usp31	6.32156e-29	-0.873738	0.111	0.32	1.71984e-24
Src	6.43715e-29	-1.80685	0.035	0.205	1.75129e-24
Stard3nl	6.50177e-29	-0.834838	0.112	0.326	1.76887e-24
Rab37	6.61196e-29	-1.55061	0.027	0.192	1.79885e-24
Isl2	6.63498e-29	-0.991925	0.079	0.277	1.80511e-24
Abhd12	6.94685e-29	-0.82276	0.175	0.409	1.88996e-24
Cpne6	7.70551e-29	-1.32623	0.089	0.287	2.09636e-24
Tesk2	8.23294e-29	-1.69334	0.095	0.288	2.23985e-24
Jhy	8.27803e-29	-2.13204	0.015	0.172	2.25212e-24
Kcnmb4	8.43312e-29	-2.28695	0.023	0.184	2.29431e-24
Sel1l3	8.56282e-29	-2.38568	0.023	0.184	2.3296e-24
Pou4f1	8.74357e-29	-0.978057	0.148	0.368	2.37877e-24
Tspan2	9.30699e-29	-1.13982	0.045	0.224	2.53206e-24
Avil	9.35169e-29	-0.856934	0.237	0.475	2.54422e-24
Grin3a	9.49764e-29	-2.15155	0.031	0.197	2.58393e-24
Mllt11	1.03316e-28	-0.698348	0.109	0.324	2.81082e-24
Cpped1	1.15827e-28	-0.978613	0.081	0.277	3.1512e-24
Ptprn	1.20823e-28	-1.26223	0.087	0.279	3.28711e-24
Vasp	1.23944e-28	-0.918043	0.059	0.247	3.37202e-24
Stambpl1	1.34334e-28	-1.8688	0.028	0.193	3.6547e-24
Camk2a	1.34349e-28	-1.47157	0.103	0.298	3.65509e-24
Tcf4	1.34703e-28	0.834543	0.613	0.516	3.66473e-24
Thbd	1.3845e-28	2.62006	0.139	0.05	3.76668e-24
Rgs17	1.39576e-28	-1.44267	0.065	0.251	3.79731e-24
Rab7b	1.40802e-28	2.19252	0.104	0.03	3.83067e-24
Camsap2	1.42724e-28	-0.694689	0.184	0.428	3.88294e-24
Svil	1.5729e-28	1.28426	0.423	0.283	4.27922e-24
Tmem255a	1.74476e-28	-1.41329	0.064	0.248	4.74679e-24
Plcxd2	1.75512e-28	-2.16829	0.029	0.194	4.77497e-24
E2f3	1.85654e-28	-1.17984	0.061	0.247	5.05091e-24
Dcbld1	1.88849e-28	-1.53265	0.031	0.197	5.13781e-24
Ccdc141	1.92858e-28	-1.41401	0.131	0.333	5.2469e-24
Syt4	1.99544e-28	-0.919385	0.199	0.429	5.4288e-24
Gm40841	2.14785e-28	-2.08047	0.021	0.181	5.84344e-24
Vstm2l	2.15485e-28	-1.20835	0.057	0.241	5.86247e-24
Capn5	2.20571e-28	-1.31736	0.08	0.273	6.00086e-24
Slc45a1	2.2962e-28	-1.66388	0.024	0.186	6.24704e-24
Sptbn4	2.31396e-28	-1.11865	0.055	0.237	6.29535e-24
Synpr	2.32445e-28	-1.89637	0.112	0.301	6.32391e-24
Ncdn	2.43321e-28	-0.876571	0.173	0.402	6.61979e-24
Mat2a	2.57637e-28	-0.613842	0.271	0.538	7.00928e-24
Gm10863	2.58145e-28	-2.80947	0.044	0.208	7.0231e-24
Scn1a	2.61288e-28	-1.4753	0.116	0.311	7.10859e-24
Cdk6	2.74543e-28	-1.65422	0.108	0.298	7.46921e-24
Mvb12b	2.78897e-28	-0.729119	0.231	0.474	7.58766e-24
N4bp2l1	2.95165e-28	-1.17676	0.072	0.262	8.03027e-24
Bcl7a	3.00392e-28	-1.48045	0.052	0.229	8.17247e-24
Man2a1	3.20258e-28	1.92729	0.331	0.202	8.71293e-24
Vwa5b2	3.31779e-28	-1.94758	0.02	0.178	9.02639e-24
Syt6	3.31955e-28	-2.43475	0.032	0.194	9.03117e-24
Fads1	3.3615e-28	-1.18002	0.085	0.28	9.14531e-24
Sbk1	3.46342e-28	-1.5038	0.043	0.215	9.42257e-24
Sh3pxd2b	3.48392e-28	-1.1774	0.187	0.398	9.47835e-24
Gm973	3.58717e-28	2.63923	0.149	0.056	9.75926e-24
Tmem25	4.0327e-28	-1.34613	0.041	0.214	1.09714e-23
Cab39l	4.5345e-28	-0.760245	0.247	0.496	1.23366e-23
Hif1a	4.6329e-28	-0.89626	0.124	0.336	1.26043e-23
Ppef1	4.67693e-28	-1.36162	0.067	0.25	1.2724e-23
Pcyt1a	5.03905e-28	-0.877263	0.097	0.301	1.37092e-23
Nrn1	5.73377e-28	-0.913321	0.169	0.396	1.55993e-23
Unc13c	5.79042e-28	-1.76389	0.097	0.285	1.57534e-23
Abhd2	5.88383e-28	-0.929139	0.161	0.38	1.60076e-23
Arvcf	5.95762e-28	-0.969474	0.056	0.237	1.62083e-23
Tnfrsf21	6.48635e-28	-0.984773	0.109	0.314	1.76468e-23
Cep120	7.11906e-28	-0.755556	0.183	0.416	1.93681e-23
Uhrf1bp1l	7.26794e-28	-0.727389	0.204	0.445	1.97732e-23
Trpc3	8.01273e-28	-2.34987	0.059	0.231	2.17994e-23
Ids	8.02862e-28	-1.14507	0.107	0.306	2.18427e-23
Ptprn2	8.35121e-28	-1.47392	0.064	0.245	2.27203e-23
Dpysl3	8.71912e-28	-0.730675	0.377	0.595	2.37212e-23
Gm10419	9.16063e-28	-1.6462	0.027	0.187	2.49224e-23
Gpc1	9.69235e-28	-1.10545	0.075	0.262	2.6369e-23
Cep170	9.75956e-28	-0.674777	0.216	0.459	2.65519e-23
Ttl	1.00401e-27	-0.934187	0.164	0.386	2.73151e-23
Lzts1	1.02987e-27	-1.47551	0.031	0.195	2.80186e-23
Prima1	1.09868e-27	-2.98357	0.025	0.18	2.98907e-23
Gsr	1.20326e-27	-0.811397	0.101	0.305	3.27358e-23
Tmem63c	1.26489e-27	-1.23827	0.044	0.217	3.44125e-23
Slc43a2	1.2684e-27	-0.76382	0.139	0.357	3.4508e-23
Ank	1.2734e-27	-0.6376	0.267	0.521	3.4644e-23
Ehd3	1.3368e-27	-0.937832	0.128	0.34	3.6369e-23
Tro	1.34399e-27	-1.03444	0.097	0.295	3.65645e-23
P4ha3	1.4285e-27	-2.24721	0.023	0.179	3.88639e-23
Dzank1	1.44706e-27	-1.02264	0.075	0.264	3.93687e-23
Peg3	1.494e-27	-0.841752	0.237	0.457	4.06457e-23
Sparcl1	1.53944e-27	-0.948895	0.189	0.409	4.18819e-23
Ptgds	1.54572e-27	2.27332	0.255	0.133	4.2053e-23
Clcn5	1.63708e-27	-0.967942	0.093	0.291	4.45383e-23
Rimbp2	1.70136e-27	-2.53935	0.024	0.179	4.62873e-23
Cables1	1.71598e-27	-3.30698	0.009	0.155	4.6685e-23
Pcdh1	1.72929e-27	-1.69665	0.035	0.198	4.70471e-23
Gramd4	1.76753e-27	-0.823104	0.109	0.315	4.80874e-23
Atp6v1a	2.10652e-27	-0.73286	0.325	0.573	5.73099e-23
Abca8a	2.18289e-27	-1.80661	0.283	0.454	5.93877e-23
Fzd3	2.21198e-27	-1.15149	0.108	0.306	6.01792e-23
Gm20033	2.22608e-27	2.67531	0.175	0.074	6.05628e-23
6330411D24Rik	2.25899e-27	-2.37102	0.043	0.208	6.14581e-23
Bcl2	2.34942e-27	-0.922778	0.297	0.528	6.39182e-23
Col6a3	2.52617e-27	1.71832	0.193	0.084	6.87269e-23
Map1a	2.5613e-27	-1.3178	0.46	0.658	6.96828e-23
Hoxa5	2.76489e-27	2.24383	0.223	0.109	7.52215e-23
Atp1a3	2.78085e-27	-1.05858	0.105	0.304	7.56558e-23
Dbn1	2.80264e-27	-0.770659	0.072	0.26	7.62485e-23
Cep170b	2.86503e-27	-0.984893	0.043	0.213	7.79461e-23
Ube2q2	2.96209e-27	-0.607466	0.123	0.337	8.05866e-23
Ctdspl	3.16506e-27	1.15381	0.477	0.348	8.61087e-23
Pfn2	3.28811e-27	-0.836256	0.105	0.309	8.94562e-23
Cic	3.39717e-27	-0.934056	0.095	0.293	9.24234e-23
Slc2a3	3.48835e-27	-1.11014	0.049	0.224	9.49041e-23
Pde11a	3.67504e-27	-1.79433	0.109	0.292	9.99832e-23
Gm48765	3.77202e-27	-0.93873	0.201	0.427	1.02622e-22
Mical1	3.78369e-27	-1.20217	0.055	0.231	1.02939e-22
Tfpi	3.83485e-27	2.65546	0.107	0.033	1.04331e-22
Adgrl2	3.99586e-27	-1.52123	0.077	0.259	1.08711e-22
Sh3bgrl2	3.99935e-27	-1.00238	0.121	0.327	1.08806e-22
Sptbn2	4.07445e-27	-1.23873	0.049	0.222	1.1085e-22
AI838599	4.09941e-27	3.08729	0.123	0.042	1.11529e-22
Pknox2	4.31907e-27	1.20105	0.521	0.426	1.17505e-22
Arhgef26	4.35085e-27	-2.19773	0.045	0.207	1.18369e-22
Ece1	4.59192e-27	-0.749226	0.167	0.393	1.24928e-22
4930447C04Rik	4.66473e-27	-1.48428	0.028	0.187	1.26909e-22
Actr3	4.74425e-27	-0.742229	0.185	0.417	1.29072e-22
Abca6	4.78878e-27	-1.71816	0.061	0.236	1.30283e-22
Abtb2	5.04155e-27	-1.02517	0.153	0.367	1.3716e-22
Camk2b	5.27825e-27	-1.13013	0.037	0.203	1.436e-22
Ghitm	5.36148e-27	-0.676995	0.177	0.41	1.45864e-22
Scn8a	5.66829e-27	-1.12603	0.184	0.395	1.54211e-22
Homer1	5.84462e-27	-0.959181	0.067	0.251	1.59009e-22
Slit1	5.88655e-27	-1.63324	0.045	0.213	1.6015e-22
Hsd17b7	5.89626e-27	-1.50349	0.036	0.199	1.60414e-22
Cntnap5c	5.93258e-27	-1.78525	0.041	0.205	1.61402e-22
Glis3	5.94124e-27	-2.61019	0.043	0.203	1.61637e-22
Aspa	6.01013e-27	-1.60817	0.187	0.367	1.63512e-22
Epb41l3	6.0593e-27	-1.06472	0.44	0.594	1.64849e-22
Slc9a7	6.49371e-27	-1.5943	0.035	0.196	1.76668e-22
Nuak1	6.6804e-27	-0.707921	0.113	0.32	1.81747e-22
Sema4f	6.76835e-27	-1.57751	0.029	0.187	1.8414e-22
Sox11	7.02135e-27	-2.59962	0.012	0.157	1.91023e-22
Mfap3l	7.24699e-27	-1.03287	0.117	0.317	1.97162e-22
Tprgl	7.497e-27	-0.787023	0.108	0.311	2.03963e-22
Celsr3	7.53014e-27	-2.04291	0.013	0.16	2.04865e-22
Wdr17	8.00912e-27	-1.35123	0.053	0.226	2.17896e-22
Tbc1d22a	8.06317e-27	-0.903711	0.128	0.338	2.19367e-22
Ankrd52	8.6693e-27	-0.677952	0.092	0.289	2.35857e-22
Rusc1	8.7221e-27	-0.69704	0.093	0.292	2.37294e-22
Ttll11	8.78053e-27	-1.11127	0.051	0.222	2.38883e-22
Fmo1	9.55436e-27	1.37424	0.331	0.191	2.59936e-22
Calm3	9.66088e-27	-0.756387	0.244	0.484	2.62834e-22
Mark1	1.1609e-26	-1.15966	0.059	0.234	3.15835e-22
Kcnk13	1.17246e-26	-3.00288	0.013	0.157	3.18979e-22
Ola1	1.22359e-26	-0.596113	0.137	0.356	3.32889e-22
Grik1	1.25209e-26	-2.83967	0.285	0.483	3.40645e-22
Zfp638	1.3791e-26	-0.727493	0.385	0.642	3.75198e-22
Cmtm5	1.44191e-26	-2.65297	0.039	0.194	3.92287e-22
Ankrd55	1.44413e-26	-1.73625	0.024	0.178	3.92889e-22
Rps6ka2	1.48606e-26	-0.811459	0.112	0.314	4.04296e-22
Kcnj3	1.49557e-26	-2.60591	0.024	0.175	4.06884e-22
Eef1a2	1.50259e-26	-0.882844	0.187	0.41	4.08793e-22
Camta1	1.50373e-26	-0.813403	0.485	0.663	4.09105e-22
Adgrb1	1.62647e-26	-2.37886	0.023	0.173	4.42497e-22
Chn1	1.68336e-26	-0.75723	0.128	0.334	4.57975e-22
Map3k9	1.75839e-26	-5.09565	0.001	0.135	4.78387e-22
Tmem184c	1.76738e-26	-0.877716	0.103	0.299	4.80833e-22
Ywhag	1.89276e-26	-1.01041	0.444	0.659	5.14944e-22
Plekha7	1.91302e-26	-1.97433	0.064	0.234	5.20457e-22
Ube2o	1.92882e-26	-0.608979	0.171	0.4	5.24755e-22
Nup93	1.9749e-26	-0.985418	0.179	0.385	5.3729e-22
Pfkfb3	2.03821e-26	-1.14712	0.065	0.243	5.54516e-22
Stmn2	2.09874e-26	-0.8165	0.523	0.69	5.70983e-22
Rasgrp1	2.35136e-26	-2.00681	0.041	0.202	6.39711e-22
Clip3	2.81069e-26	-0.6909	0.173	0.4	7.64677e-22
Limk1	2.87132e-26	-0.691386	0.123	0.33	7.81171e-22
Pcdhac1	2.95957e-26	-2.28202	0.012	0.155	8.0518e-22
Tox2	3.07182e-26	-2.59584	0.017	0.163	8.35719e-22
Smad1	3.22147e-26	-0.692036	0.128	0.335	8.76434e-22
Zfp975	3.27282e-26	-2.28877	0.017	0.163	8.90404e-22
Tafa2	3.64752e-26	-3.00247	0.056	0.219	9.92343e-22
Pgap4	3.83145e-26	-1.31235	0.035	0.193	1.04238e-21
Phc2	4.0782e-26	1.18995	0.531	0.462	1.10952e-21
Ctnnbip1	4.10242e-26	-0.942481	0.087	0.274	1.11611e-21
Arl8a	4.12304e-26	-0.618906	0.208	0.443	1.12171e-21
Lrrn3	4.13725e-26	-2.0909	0.035	0.191	1.12558e-21
Adamts20	4.14831e-26	-2.3475	0.044	0.201	1.12859e-21
Spin1	4.1634e-26	-0.786734	0.113	0.315	1.13269e-21
Anxa7	4.2002e-26	-0.587801	0.187	0.414	1.14271e-21
Shisal1	4.34651e-26	-1.32775	0.041	0.204	1.18251e-21
Phyhd1	4.37847e-26	2.15572	0.157	0.063	1.19121e-21
Kcnj2	4.47836e-26	2.83797	0.116	0.039	1.21838e-21
Slc2a13	4.4831e-26	1.71495	0.3	0.177	1.21967e-21
Atp2b3	4.53229e-26	-1.95572	0.019	0.166	1.23305e-21
Chd7	4.53589e-26	-1.31105	0.084	0.262	1.23403e-21
Pcyt2	4.83297e-26	-0.80439	0.145	0.356	1.31486e-21
Ccdc28a	5.08452e-26	-0.692041	0.072	0.256	1.3833e-21
Sema3e	5.24176e-26	-2.16755	0.029	0.182	1.42607e-21
Cdk5rap2	5.39974e-26	-0.61645	0.156	0.378	1.46905e-21
Cfap100	5.50301e-26	-3.45186	0.028	0.175	1.49715e-21
Scg3	5.76374e-26	-0.775458	0.295	0.531	1.56808e-21
Fez1	5.87728e-26	-0.716225	0.167	0.389	1.59897e-21
Cda	6.00987e-26	-0.91347	0.068	0.247	1.63505e-21
Nin	6.14223e-26	-0.801138	0.117	0.318	1.67105e-21
Panx1	6.31648e-26	-1.57406	0.031	0.185	1.71846e-21
Phtf1	6.51567e-26	-0.636813	0.128	0.335	1.77265e-21
Hsdl2	6.71765e-26	-1.05191	0.067	0.242	1.8276e-21
Pstpip2	7.09021e-26	-2.11509	0.029	0.181	1.92896e-21
Nudt3	7.28255e-26	-0.601372	0.16	0.381	1.98129e-21
Sdc2	7.32257e-26	1.57661	0.331	0.201	1.99218e-21
Mdfic2	7.40183e-26	-1.68513	0.119	0.301	2.01374e-21
Pink1	7.5337e-26	-0.731706	0.108	0.305	2.04962e-21
Fhdc1	7.67688e-26	-2.42493	0.029	0.179	2.08857e-21
Rora	7.73579e-26	0.330149	0.813	0.667	2.1046e-21
Septin8	7.77184e-26	-0.731916	0.169	0.391	2.11441e-21
Ttyh3	7.92759e-26	-1.39968	0.044	0.206	2.15678e-21
Armcx1	9.35462e-26	-0.701429	0.087	0.275	2.54502e-21
Tmem169	9.51384e-26	-1.85393	0.019	0.164	2.58833e-21
Stac2	9.8462e-26	-0.932965	0.051	0.219	2.67876e-21
Sh2d4b	9.90568e-26	-2.56261	0.021	0.167	2.69494e-21
Sh3bp5l	1.00095e-25	-0.802228	0.068	0.246	2.72319e-21
Rbm25	1.00681e-25	0.696111	0.763	0.774	2.73914e-21
Plxna2	1.01586e-25	-1.02459	0.185	0.394	2.76374e-21
Leprotl1	1.0247e-25	-0.869917	0.083	0.267	2.78779e-21
Lrrc49	1.04509e-25	-0.752429	0.181	0.401	2.84326e-21
Impdh1	1.0875e-25	-1.04755	0.065	0.241	2.95866e-21
Ppfia3	1.095e-25	-1.28158	0.028	0.181	2.97904e-21
Gm43713	1.12578e-25	-1.02466	0.031	0.186	3.06279e-21
Sars	1.16877e-25	-0.621341	0.169	0.39	3.17975e-21
Zdhhc21	1.20309e-25	-0.679325	0.204	0.434	3.27313e-21
Ngfr	1.26305e-25	-1.25317	0.12	0.313	3.43625e-21
Hs6st2	1.29874e-25	-1.3887	0.085	0.261	3.53336e-21
Tmem245	1.38743e-25	-0.712735	0.232	0.467	3.77465e-21
Zmiz1	1.5371e-25	1.05633	0.575	0.504	4.18183e-21
Tmem200a	1.54342e-25	-2.0612	0.023	0.169	4.19902e-21
Cacul1	1.58209e-25	-0.757898	0.132	0.338	4.30423e-21
Acadl	1.59745e-25	-0.596183	0.18	0.409	4.34603e-21
Ceacam1	1.61017e-25	1.99309	0.125	0.044	4.38062e-21
Tsga10	1.72172e-25	-0.637384	0.093	0.285	4.68412e-21
Sorcs3	1.7394e-25	-2.29686	0.044	0.201	4.7322e-21
Cipc	1.85423e-25	-0.806655	0.111	0.305	5.04463e-21
Gm29478	1.85696e-25	2.20021	0.133	0.049	5.05205e-21
Gfra2	1.90075e-25	-1.20148	0.115	0.3	5.17119e-21
Csdc2	1.9714e-25	-1.15477	0.056	0.224	5.3634e-21
Ephb2	2.00684e-25	2.49517	0.204	0.099	5.4598e-21
Usp20	2.01572e-25	-0.799263	0.12	0.322	5.48396e-21
Lrrc8c	2.0481e-25	-0.807487	0.121	0.322	5.57206e-21
Fhod3	2.09197e-25	-2.68679	0.027	0.173	5.6914e-21
Cntn4	2.14337e-25	-1.90056	0.043	0.2	5.83126e-21
Abcg2	2.23436e-25	0.923442	0.36	0.225	6.07879e-21
Timp3	2.2727e-25	-1.09558	0.307	0.506	6.18311e-21
Igip	2.30707e-25	-0.997951	0.077	0.256	6.27662e-21
Kalrn	2.35055e-25	1.03274	0.568	0.476	6.39492e-21
Cacng7	2.35738e-25	-1.22332	0.039	0.197	6.4135e-21
Hivep2	2.69239e-25	0.868781	0.652	0.603	7.3249e-21
Dcc	2.69735e-25	-2.54231	0.057	0.217	7.33841e-21
Rap1gds1	2.70682e-25	-0.539119	0.375	0.627	7.36418e-21
Hook1	2.86122e-25	-2.50927	0.007	0.14	7.78423e-21
Vgll4	2.87307e-25	1.48625	0.497	0.416	7.81647e-21
Rasgef1b	2.89456e-25	-1.47651	0.068	0.237	7.87493e-21
Gm10862	2.92625e-25	-3.36358	0.004	0.135	7.96115e-21
Nwd1	3.02978e-25	-2.69761	0.035	0.182	8.24283e-21
Lrrc3b	3.06495e-25	-1.79784	0.02	0.164	8.33851e-21
Rapgef4	3.1775e-25	-0.708308	0.184	0.39	8.64471e-21
Secisbp2l	3.23289e-25	-0.888894	0.225	0.456	8.79541e-21
Lgmn	3.24204e-25	-0.84621	0.133	0.335	8.82031e-21
Ano4	3.69247e-25	-1.73156	0.088	0.264	1.00457e-20
Flot1	4.07322e-25	-0.640969	0.163	0.382	1.10816e-20
Sfxn5	4.1316e-25	-0.802154	0.117	0.314	1.12404e-20
Smo	4.23707e-25	1.59858	0.251	0.131	1.15274e-20
Pcgf1	4.32516e-25	-0.753911	0.052	0.218	1.1767e-20
Nlgn3	4.40267e-25	-1.42127	0.041	0.198	1.19779e-20
Prrxl1	4.45724e-25	-0.798676	0.104	0.295	1.21264e-20
Tspan13	4.88455e-25	-0.79889	0.095	0.281	1.32889e-20
Morrbid	5.09525e-25	-1.51948	0.123	0.303	1.38621e-20
Slc7a7	5.38354e-25	-1.19701	0.079	0.253	1.46465e-20
Stmn1	5.4012e-25	-0.72297	0.171	0.388	1.46945e-20
Tfg	5.45689e-25	-0.656296	0.108	0.301	1.4846e-20
Jph3	5.62009e-25	-0.872661	0.081	0.263	1.529e-20
Pdzd8	5.72083e-25	-0.665676	0.107	0.299	1.55641e-20
Fbxo41	5.75968e-25	-1.27485	0.027	0.175	1.56698e-20
Satb1	5.95952e-25	-1.22765	0.104	0.289	1.62135e-20
Rubcn	6.0917e-25	-0.674877	0.135	0.341	1.65731e-20
Ccdc60	6.19514e-25	-1.56114	0.037	0.191	1.68545e-20
Plcb3	6.28041e-25	1.20403	0.453	0.338	1.70865e-20
Gm12116	6.3993e-25	-3.56068	0.005	0.136	1.74099e-20
Svop	6.40262e-25	-0.99531	0.056	0.221	1.7419e-20
Sh3glb1	6.62856e-25	-0.551463	0.247	0.487	1.80337e-20
Zfp871	7.32684e-25	-0.594515	0.18	0.401	1.99334e-20
Pcnx	7.42099e-25	-0.690476	0.149	0.359	2.01896e-20
Usp22	7.43883e-25	-0.603649	0.139	0.348	2.02381e-20
Dusp26	7.78204e-25	-0.971418	0.083	0.262	2.11718e-20
Slc8a3	7.83264e-25	-1.54794	0.028	0.175	2.13095e-20
Asns	8.19878e-25	-1.577	0.036	0.188	2.23056e-20
Kcnd1	8.41647e-25	-0.845504	0.073	0.25	2.28978e-20
Tfrc	8.64302e-25	-0.981249	0.052	0.217	2.35142e-20
Plekhd1	8.6908e-25	-1.79573	0.036	0.188	2.36442e-20
Tox3	9.03962e-25	-1.99004	0.04	0.191	2.45932e-20
Lyst	1.06063e-24	-0.779699	0.26	0.488	2.88555e-20
Rpgr	1.16308e-24	-1.08715	0.072	0.244	3.16429e-20
Wipf1	1.1934e-24	1.09073	0.536	0.447	3.24675e-20
Gan	1.20811e-24	-0.750873	0.156	0.363	3.28679e-20
Nsg2	1.21515e-24	-0.958984	0.065	0.236	3.30593e-20
G3bp2	1.2337e-24	-0.597012	0.232	0.46	3.35641e-20
Actl6b	1.30623e-24	-1.2968	0.024	0.169	3.55373e-20
Sdcbp	1.32954e-24	-0.654255	0.196	0.417	3.61714e-20
Naaladl2	1.34976e-24	1.04175	0.584	0.507	3.67215e-20
Rnf187	1.3922e-24	-0.739015	0.151	0.356	3.78763e-20
Itgb8	1.46092e-24	-1.57484	0.189	0.367	3.97457e-20
Shroom3	1.48567e-24	-1.02851	0.135	0.325	4.04191e-20
Irgq	1.50422e-24	-0.979773	0.06	0.225	4.09239e-20
Tbc1d4	1.54898e-24	-0.591751	0.1	0.287	4.21417e-20
Tcf20	1.60821e-24	-0.602064	0.268	0.5	4.3753e-20
Xist	1.62655e-24	0.394366	0.896	0.796	4.4252e-20
S1pr3	1.62941e-24	-1.46654	0.052	0.209	4.43296e-20
Cpeb1	1.63021e-24	-0.637726	0.347	0.581	4.43514e-20
Gpt2	1.65654e-24	-0.752666	0.096	0.28	4.50679e-20
Clasp2	1.7429e-24	-0.56704	0.484	0.718	4.74173e-20
Popdc3	1.88065e-24	-1.75653	0.021	0.163	5.11651e-20
Plekha5	1.92946e-24	-0.920327	0.377	0.564	5.2493e-20
Slc15a2	2.02754e-24	-1.48697	0.053	0.212	5.51612e-20
Cdk5r2	2.08363e-24	-1.07497	0.063	0.23	5.66872e-20
Mthfd1l	2.11688e-24	-0.891157	0.099	0.282	5.75917e-20
Rap2a	2.13375e-24	-0.811773	0.089	0.27	5.80507e-20
Trak2	2.15925e-24	-0.614273	0.121	0.319	5.87445e-20
Plxnc1	2.38673e-24	-1.14156	0.171	0.364	6.49335e-20
Camk2g	2.4218e-24	-0.718477	0.353	0.587	6.58876e-20
Sptb	2.50312e-24	-1.62734	0.045	0.2	6.80999e-20
Palld	2.5252e-24	-0.734844	0.083	0.256	6.87005e-20
Kif3b	2.81056e-24	-0.421991	0.115	0.312	7.6464e-20
Nat8l	2.89832e-24	-0.94464	0.149	0.352	7.88518e-20
Rps6ka5	2.92312e-24	-1.02852	0.161	0.359	7.95263e-20
Fkbp1b	3.1089e-24	-1.05139	0.065	0.234	8.45808e-20
Pebp1	3.28461e-24	-0.721007	0.14	0.342	8.9361e-20
Ppp1r12b	3.45292e-24	1.10445	0.545	0.463	9.39402e-20
Armcx3	3.47949e-24	-0.671599	0.117	0.31	9.46631e-20
Kctd1	3.51903e-24	-1.24167	0.173	0.364	9.57387e-20
Fabp5	3.56169e-24	-0.656004	0.105	0.296	9.68993e-20
Mtmr6	3.59369e-24	-0.620509	0.212	0.434	9.77699e-20
Chn2	3.63468e-24	-2.09334	0.04	0.189	9.88851e-20
Agfg2	3.7918e-24	-0.682071	0.119	0.314	1.0316e-19
Hacd3	4.06026e-24	-0.563656	0.183	0.401	1.10464e-19
Jag2	4.24072e-24	-1.65274	0.019	0.156	1.15373e-19
Katnal1	4.29739e-24	-0.785413	0.072	0.243	1.16915e-19
Ap1b1	4.29839e-24	-0.533218	0.128	0.326	1.16942e-19
Zmat3	4.43891e-24	-0.637077	0.101	0.288	1.20765e-19
Sntb2	4.51451e-24	-0.758613	0.232	0.452	1.22822e-19
Lrpprc	4.5414e-24	-0.608097	0.12	0.316	1.23553e-19
Lrrtm4	4.61848e-24	-3.35154	0.035	0.178	1.2565e-19
Optn	4.75749e-24	-0.718992	0.077	0.251	1.29432e-19
Ccp110	5.2002e-24	-0.56141	0.121	0.316	1.41477e-19
Rnps1	5.29224e-24	-0.580059	0.123	0.321	1.43981e-19
Tmeff1	5.40304e-24	-1.02274	0.036	0.186	1.46995e-19
Map2k4	5.58341e-24	-0.596652	0.228	0.46	1.51902e-19
Nhsl1	5.69947e-24	-1.72041	0.071	0.231	1.5506e-19
Sms	5.77034e-24	-0.551746	0.127	0.326	1.56988e-19
Fkbp1a	5.92535e-24	-0.562354	0.212	0.439	1.61205e-19
Rcsd1	6.05464e-24	1.52474	0.201	0.094	1.64722e-19
Coro1a	6.07298e-24	-1.0723	0.092	0.27	1.65221e-19
Arglu1	6.2885e-24	1.06814	0.607	0.572	1.71085e-19
Rab15	6.31522e-24	-1.04385	0.08	0.252	1.71812e-19
Creb3l1	6.39978e-24	2.7317	0.143	0.058	1.74112e-19
Klc2	6.69143e-24	-0.647251	0.131	0.33	1.82047e-19
Mapk11	6.86858e-24	-0.576787	0.056	0.22	1.86867e-19
Six4	7.10023e-24	-1.27722	0.037	0.187	1.93169e-19
Lrrk1	7.29608e-24	1.56439	0.272	0.152	1.98497e-19
Napb	7.44689e-24	-0.753362	0.259	0.48	2.026e-19
Ireb2	7.64788e-24	-0.561357	0.136	0.338	2.08068e-19
Cap1	7.66339e-24	-0.597853	0.099	0.283	2.0849e-19
Lrrk2	7.66982e-24	-0.975963	0.089	0.267	2.08665e-19
Uba6	7.67613e-24	-0.751443	0.132	0.325	2.08837e-19
Rassf4	7.91859e-24	-1.58884	0.053	0.208	2.15433e-19
Norad	8.01944e-24	-0.939236	0.281	0.494	2.18177e-19
Chd5	8.44646e-24	-1.5469	0.047	0.199	2.29795e-19
Fbxl16	8.51876e-24	-1.27085	0.037	0.186	2.31761e-19
Lhcgr	8.52091e-24	-2.52976	0.035	0.176	2.3182e-19
Calcb	8.57949e-24	-1.06136	0.068	0.235	2.33414e-19
Fam13c	8.665e-24	-1.84397	0.033	0.179	2.3574e-19
Icmt	9.30033e-24	-1.41727	0.039	0.188	2.53025e-19
Mbp	9.3394e-24	-1.04521	0.293	0.521	2.54088e-19
Slc12a4	9.35171e-24	1.73546	0.241	0.127	2.54423e-19
Lrrc75b	9.69728e-24	-0.943898	0.055	0.214	2.63824e-19
Rtn2	1.00952e-23	-1.16269	0.035	0.182	2.7465e-19
Acvr2a	1.07185e-23	-1.00142	0.121	0.309	2.91608e-19
Lmbrd2	1.10367e-23	-0.563954	0.117	0.31	3.00264e-19
5031439G07Rik	1.11577e-23	-0.614573	0.119	0.311	3.03556e-19
Rab39	1.11812e-23	-0.313147	0.107	0.298	3.04196e-19
Tbcd	1.11859e-23	-0.570432	0.183	0.401	3.04324e-19
Cltc	1.20332e-23	-0.603106	0.357	0.592	3.27374e-19
Coro1c	1.26399e-23	-0.508511	0.103	0.293	3.43882e-19
Ube2d1	1.27771e-23	-0.639462	0.097	0.283	3.47613e-19
Ryr3	1.3013e-23	-1.16384	0.099	0.274	3.5403e-19
Zdhhc8	1.32949e-23	-0.683704	0.139	0.337	3.61701e-19
Galnt16	1.40285e-23	-1.67603	0.049	0.201	3.8166e-19
Thsd7b	1.42238e-23	-1.46948	0.064	0.226	3.86972e-19
Purg	1.44964e-23	-0.662235	0.232	0.456	3.94388e-19
Pcolce2	1.45656e-23	-1.59191	0.025	0.165	3.96272e-19
Pip4p1	1.46111e-23	-0.686046	0.083	0.257	3.97508e-19
Shc2	1.52527e-23	-1.34995	0.029	0.172	4.14965e-19
Panx2	1.56958e-23	-1.42045	0.027	0.167	4.27019e-19
Evi5l	1.69857e-23	-0.504244	0.121	0.315	4.62114e-19
Actr2	1.70305e-23	-0.546944	0.264	0.501	4.63332e-19
Ppm1j	1.82113e-23	-0.983143	0.057	0.217	4.95456e-19
Ccdc92b	1.91371e-23	-2.09903	0.015	0.146	5.20645e-19
Josd2	1.92083e-23	-0.920053	0.087	0.259	5.22582e-19
Scrt2	1.93123e-23	-1.2652	0.02	0.155	5.25411e-19
Gria1	1.98075e-23	-1.92308	0.045	0.194	5.38884e-19
Ankib1	2.04784e-23	-0.634795	0.221	0.444	5.57135e-19
Lrsam1	2.09068e-23	-0.541796	0.133	0.332	5.6879e-19
Selenot	2.15312e-23	-0.568459	0.112	0.299	5.85779e-19
Myo18a	2.15988e-23	-0.485646	0.312	0.561	5.87616e-19
Pank1	2.16995e-23	-1.31405	0.041	0.189	5.90357e-19
Col5a3	2.19172e-23	-0.947026	0.197	0.393	5.96281e-19
Actr1a	2.26039e-23	-0.472207	0.183	0.4	6.14962e-19
Tmem50b	2.26807e-23	-0.660086	0.092	0.27	6.17052e-19
Cdh1	2.27888e-23	-0.741882	0.204	0.413	6.19993e-19
Zc3h11a.1	2.41483e-23	0.964545	0.587	0.558	6.56978e-19
Stx3	2.43483e-23	-0.953171	0.039	0.186	6.6242e-19
Rcc2	2.45322e-23	-0.846459	0.079	0.248	6.67423e-19
Nr3c1	2.51527e-23	1.13805	0.493	0.397	6.84305e-19
Kirrel3	2.60836e-23	-2.64949	0.111	0.277	7.09631e-19
Ptpn11	2.67064e-23	-0.626914	0.151	0.352	7.26574e-19
Sfxn2	2.67636e-23	2.20948	0.208	0.105	7.28131e-19
Pkd1	2.68386e-23	1.35376	0.461	0.375	7.30172e-19
Slc16a9	2.69961e-23	2.41175	0.203	0.102	7.34456e-19
Syt2	2.74197e-23	-1.07705	0.12	0.301	7.4598e-19
Ago4	2.76947e-23	-1.0319	0.041	0.191	7.53463e-19
Ehd4	2.81456e-23	-0.923998	0.085	0.256	7.65728e-19
Epha6	2.96382e-23	-1.86664	0.087	0.248	8.06336e-19
Selenoi	3.04301e-23	-0.633	0.088	0.265	8.27882e-19
Ptpn12	3.09398e-23	-0.658046	0.237	0.463	8.41747e-19
Cat	3.09921e-23	-0.733305	0.113	0.299	8.43171e-19
Zfand5	3.13372e-23	-0.550183	0.169	0.377	8.5256e-19
Psmd14	3.21963e-23	-0.578302	0.219	0.44	8.75932e-19
Mrgpra2b	3.35888e-23	-1.50614	0.061	0.218	9.13816e-19
Psmc5	3.49239e-23	-0.621086	0.1	0.282	9.50139e-19
Sfrp4	3.57378e-23	1.74565	0.14	0.056	9.72283e-19
Ythdc2	3.68186e-23	-0.647967	0.076	0.245	1.00169e-18
Acot7	3.76908e-23	-0.517375	0.223	0.453	1.02542e-18
Phlpp1	3.8011e-23	-0.867178	0.279	0.488	1.03413e-18
Hacd1	3.82179e-23	-0.685519	0.053	0.211	1.03976e-18
Gm20186	3.88418e-23	2.84244	0.145	0.061	1.05673e-18
Lpcat1	3.94023e-23	-0.95413	0.073	0.24	1.07198e-18
Lynx1	3.9454e-23	-1.16248	0.104	0.279	1.07339e-18
Slc9a6	3.99755e-23	-0.724438	0.085	0.259	1.08757e-18
Fig4	4.02525e-23	-0.534839	0.089	0.267	1.09511e-18
Hgs	4.02626e-23	-1.0381	0.051	0.205	1.09538e-18
Gca	4.04926e-23	-1.99032	0.035	0.176	1.10164e-18
Fras1	4.10386e-23	-1.8607	0.064	0.217	1.1165e-18
P2rx7	4.12473e-23	-1.69526	0.055	0.204	1.12217e-18
Tlcd3b	4.1457e-23	-0.84581	0.088	0.262	1.12788e-18
Gm32442	4.24314e-23	-2.3731	0.013	0.142	1.15439e-18
Dhcr7	4.37386e-23	-1.03407	0.064	0.225	1.18995e-18
Syngr3	4.49838e-23	-0.861859	0.067	0.23	1.22383e-18
Brap	4.72959e-23	-0.621852	0.177	0.387	1.28673e-18
Myo1b	4.74047e-23	-1.28433	0.079	0.244	1.28969e-18
Tvp23a	4.82083e-23	-0.745242	0.071	0.238	1.31156e-18
Wsb1	4.98242e-23	-0.65333	0.124	0.316	1.35552e-18
Scn3b	5.07521e-23	-1.3821	0.033	0.176	1.38076e-18
Col24a1	5.08683e-23	-2.23832	0.033	0.173	1.38392e-18
Dusp8	5.16351e-23	-1.08897	0.041	0.19	1.40478e-18
Gm31508	5.42322e-23	-2.15058	0.011	0.136	1.47544e-18
Pnma2	5.45232e-23	-0.845887	0.061	0.221	1.48336e-18
Stard13	5.62501e-23	-1.33112	0.549	0.678	1.53034e-18
Adcy9	5.84181e-23	1.2337	0.489	0.409	1.58932e-18
AI593442	5.89114e-23	-1.39821	0.053	0.205	1.60274e-18
Gulp1	6.06974e-23	0.358829	0.669	0.489	1.65133e-18
Thsd7a	6.24843e-23	1.05092	0.536	0.427	1.69995e-18
Myo1e	6.32027e-23	-0.677224	0.26	0.484	1.71949e-18
Fcgrt	6.33384e-23	2.09477	0.14	0.056	1.72318e-18
Ckb	6.46159e-23	-0.690581	0.252	0.477	1.75794e-18
Uba3	6.58469e-23	-0.70237	0.091	0.266	1.79143e-18
Tmem179	6.88443e-23	-1.94097	0.017	0.147	1.87298e-18
4930594M22Rik	6.89392e-23	2.15617	0.225	0.121	1.87556e-18
Celf2	7.14222e-23	-0.780815	0.616	0.769	1.94311e-18
Camk4	7.61492e-23	-1.28615	0.037	0.182	2.07171e-18
Paqr9	7.79318e-23	-1.3021	0.049	0.199	2.12021e-18
Atp6v0e2	7.87071e-23	-0.694666	0.113	0.298	2.14131e-18
Glul	8.10414e-23	1.24466	0.495	0.414	2.20481e-18
Slitrk3	8.3983e-23	-1.03156	0.047	0.196	2.28484e-18
Entpd1	9.26035e-23	-1.72498	0.069	0.223	2.51937e-18
Prr16	9.6763e-23	-2.10273	0.035	0.174	2.63253e-18
Fstl5	9.79993e-23	-1.87307	0.041	0.185	2.66617e-18
Zfp40	1.04986e-22	-0.629168	0.101	0.281	2.85626e-18
Pkia	1.07737e-22	-0.46888	0.159	0.364	2.93108e-18
Lonrf2	1.09923e-22	-0.648771	0.077	0.247	2.99057e-18
Kcna4	1.10504e-22	-1.81019	0.017	0.146	3.00637e-18
Prkaa2	1.13271e-22	-0.681938	0.087	0.259	3.08164e-18
Arl6ip1	1.1558e-22	-0.522315	0.22	0.441	3.14447e-18
Far1	1.1656e-22	-0.555775	0.261	0.496	3.17114e-18
Slc25a26	1.16709e-22	-0.931473	0.089	0.259	3.17518e-18
Ndrg4	1.19541e-22	-0.834179	0.428	0.626	3.25224e-18
Cldnd1	1.21316e-22	-0.629676	0.052	0.206	3.30051e-18
Cdh8	1.25199e-22	-1.94368	0.031	0.167	3.40616e-18
Chpf2	1.28242e-22	-0.434765	0.088	0.261	3.48895e-18
Nyap2	1.30769e-22	-2.24377	0.025	0.159	3.55771e-18
Arl5a	1.43699e-22	-0.704259	0.091	0.265	3.90947e-18
Fbxo2	1.44626e-22	-0.88684	0.092	0.263	3.9347e-18
Psen2	1.45916e-22	-0.537691	0.087	0.259	3.9698e-18
Ypel4	1.46556e-22	-1.19979	0.032	0.172	3.98721e-18
Snx21	1.47279e-22	-0.622021	0.091	0.264	4.00688e-18
Slitrk5	1.5168e-22	-1.67349	0.024	0.158	4.12662e-18
Tmem151a	1.54526e-22	-0.818493	0.077	0.244	4.20403e-18
Stard9	1.5571e-22	-0.762367	0.184	0.385	4.23625e-18
Celf4	1.56958e-22	-1.06358	0.153	0.341	4.2702e-18
Usp35	1.57445e-22	-0.611022	0.08	0.251	4.28344e-18
Ubn2	1.57523e-22	0.744947	0.648	0.606	4.28556e-18
Fbxo31	1.59551e-22	-0.78096	0.115	0.296	4.34073e-18
Nlk	1.65645e-22	-0.514081	0.275	0.505	4.50655e-18
Wdr47	1.67406e-22	-0.518586	0.116	0.304	4.55444e-18
Rhou	1.7056e-22	-0.979695	0.053	0.205	4.64025e-18
Lrriq1	1.72422e-22	-2.27623	0.009	0.132	4.6909e-18
Diaph3	1.72935e-22	-1.2235	0.072	0.232	4.70487e-18
Purb	1.75972e-22	-0.619034	0.199	0.409	4.78748e-18
Mindy3	1.7626e-22	-0.483165	0.231	0.449	4.79533e-18
Lingo1	1.76666e-22	-1.09408	0.051	0.201	4.80637e-18
Dab1	1.80899e-22	-1.96359	0.036	0.176	4.92154e-18
Tenm1	1.81369e-22	-1.59805	0.092	0.253	4.93433e-18
Htr4	1.85511e-22	-3.21677	0.021	0.149	5.04701e-18
Dpp8	1.88254e-22	-0.538984	0.168	0.373	5.12165e-18
Bcar3	1.93232e-22	-1.109	0.095	0.264	5.25706e-18
Stx7	2.0096e-22	-0.502023	0.189	0.406	5.46732e-18
Cdc37l1	2.16261e-22	-0.404956	0.259	0.501	5.88361e-18
Xylt1	2.2471e-22	-1.4932	0.071	0.224	6.11345e-18
Angpt2	2.2546e-22	-2.53264	0.037	0.173	6.13385e-18
Pcdha12	2.26527e-22	-1.42123	0.016	0.143	6.16289e-18
Eif5a2	2.29533e-22	-1.19576	0.051	0.199	6.24469e-18
4930469K13Rik	2.30585e-22	-2.77869	0.016	0.142	6.2733e-18
Rspo2	2.39109e-22	-1.77652	0.048	0.192	6.5052e-18
Gm14507	2.40221e-22	-3.82769	0.007	0.125	6.53546e-18
Rgs4	2.45719e-22	-1.07622	0.268	0.469	6.68502e-18
Kcnj10	2.52158e-22	-2.25942	0.028	0.161	6.86021e-18
Antxr2	2.59526e-22	-1.02902	0.097	0.269	7.06067e-18
Prepl	2.63484e-22	-0.845573	0.06	0.215	7.16835e-18
Fem1b	2.74491e-22	-0.641969	0.081	0.249	7.46781e-18
Scoc	2.7646e-22	-0.730322	0.14	0.328	7.52137e-18
Cdk9	2.78852e-22	-0.645961	0.097	0.272	7.58645e-18
Klf8	2.82673e-22	-1.19292	0.056	0.208	7.69039e-18
Cend1	2.9982e-22	-0.669458	0.151	0.346	8.15689e-18
Slc35f3	3.04649e-22	-1.11872	0.057	0.21	8.28827e-18
Depdc5	3.07014e-22	-0.703386	0.205	0.416	8.35262e-18
Eml5	3.08865e-22	-0.757905	0.088	0.256	8.40299e-18
Card19	3.10761e-22	-0.518501	0.057	0.214	8.45456e-18
Gng3	3.1745e-22	-0.483763	0.201	0.42	8.63655e-18
Siah3	3.33275e-22	-3.60537	0.005	0.123	9.06709e-18
Prkar1a	3.40573e-22	-0.602404	0.281	0.506	9.26564e-18
Bach2it1	3.43233e-22	-1.72858	0.017	0.144	9.33799e-18
Pfkfb4	3.55814e-22	-1.09522	0.031	0.168	9.68026e-18
Rcan3	3.56252e-22	-1.04323	0.061	0.217	9.6922e-18
Dmtn	3.65878e-22	-0.613103	0.116	0.302	9.95407e-18
Acat2	3.7925e-22	-0.669155	0.087	0.256	1.03179e-17
Lnx2	3.83035e-22	-1.37307	0.032	0.17	1.04209e-17
Sccpdh	3.85568e-22	-1.60727	0.029	0.164	1.04898e-17
Fsd1l	4.15754e-22	-0.609128	0.175	0.38	1.1311e-17
Pde10a	4.16614e-22	-1.09741	0.133	0.312	1.13344e-17
Col5a2	4.34662e-22	0.835668	0.409	0.268	1.18254e-17
Actr1b	4.41008e-22	-0.622012	0.161	0.359	1.19981e-17
Ppp2r5b	4.59322e-22	-0.630221	0.152	0.348	1.24963e-17
Reps2	4.59881e-22	1.52789	0.385	0.284	1.25115e-17
Slitrk1	4.64266e-22	-2.21245	0.024	0.154	1.26308e-17
Fnta	4.899e-22	-0.556474	0.129	0.315	1.33282e-17
Adap1	5.11384e-22	-0.374023	0.135	0.33	1.39127e-17
Mmp16	5.20733e-22	-1.04798	0.097	0.265	1.41671e-17
Wnk4	5.40045e-22	2.00511	0.123	0.047	1.46925e-17
Sfxn3	5.53383e-22	-0.791347	0.051	0.2	1.50553e-17
Napg	5.63726e-22	-0.462673	0.188	0.401	1.53367e-17
Mapk3	6.06597e-22	-0.628915	0.283	0.505	1.65031e-17
Gnl3l	6.23638e-22	-0.548235	0.157	0.358	1.69667e-17
Cd99l2	6.28335e-22	-0.530562	0.159	0.36	1.70945e-17
Ap3m1	6.36172e-22	-0.531798	0.087	0.256	1.73077e-17
Sort1	6.36925e-22	-1.37004	0.08	0.236	1.73282e-17
Tm6sf1	6.51759e-22	-1.62837	0.029	0.163	1.77317e-17
Adgrg2	6.56042e-22	-1.45818	0.041	0.182	1.78483e-17
Inpp4a	6.68218e-22	-0.480467	0.181	0.391	1.81795e-17
Sfmbt2	6.70843e-22	2.50601	0.127	0.05	1.82509e-17
Gm20300	6.73063e-22	-1.02552	0.055	0.204	1.83114e-17
Piezo2	6.79781e-22	0.364294	0.785	0.671	1.84941e-17
Psmc2	6.90405e-22	-0.592633	0.113	0.295	1.87832e-17
St3gal6	7.04215e-22	-1.04815	0.092	0.259	1.91589e-17
Slc43a3	7.07344e-22	-2.13584	0.06	0.202	1.9244e-17
Lmtk3	7.19582e-22	-1.37797	0.02	0.148	1.95769e-17
Pbxip1	7.2133e-22	1.46916	0.237	0.127	1.96245e-17
Gnaz	7.30718e-22	-0.456563	0.101	0.278	1.98799e-17
Pdcd10	7.33275e-22	-0.489925	0.112	0.294	1.99495e-17
Shisa4	7.41108e-22	-1.38201	0.049	0.194	2.01626e-17
Pkib	7.87521e-22	-1.6595	0.027	0.158	2.14253e-17
Grm8	7.95632e-22	-2.02318	0.081	0.237	2.1646e-17
Slc45a4	8.0929e-22	-0.563795	0.099	0.272	2.20175e-17
Radil	8.15152e-22	-1.07751	0.047	0.192	2.2177e-17
Ntm	8.37166e-22	-1.99081	0.095	0.25	2.2776e-17
Myh10	8.41251e-22	-0.614068	0.119	0.3	2.28871e-17
Bdnf	8.56401e-22	-2.00939	0.02	0.146	2.32992e-17
Tmem229a	8.59282e-22	-1.49438	0.031	0.164	2.33776e-17
Gpr156	8.65105e-22	-0.571891	0.063	0.22	2.3536e-17
Crot	9.20572e-22	-0.63013	0.132	0.319	2.50451e-17
Ntrk1	9.35357e-22	-1.49001	0.08	0.236	2.54473e-17
Stam	9.53704e-22	-0.591693	0.127	0.312	2.59465e-17
Ctnnbl1	1.00597e-21	-0.525734	0.109	0.291	2.73684e-17
5730522E02Rik	1.07055e-21	-1.605	0.036	0.173	2.91255e-17
Tmem130	1.07609e-21	-0.762468	0.051	0.198	2.92761e-17
Septin5	1.12758e-21	-0.493158	0.156	0.356	3.06769e-17
Clec2d	1.14981e-21	1.11584	0.175	0.078	3.12816e-17
Prkaa1	1.21148e-21	-0.474704	0.088	0.257	3.29595e-17
Ednrb	1.26345e-21	-2.51015	0.025	0.153	3.43734e-17
Mroh1	1.33763e-21	-0.596501	0.108	0.285	3.63917e-17
Vdac2	1.34777e-21	-0.535627	0.145	0.341	3.66673e-17
Lyrm1	1.57228e-21	-1.06889	0.035	0.17	4.27754e-17
Fam234b	1.68025e-21	-1.35566	0.033	0.168	4.57128e-17
Lcorl	1.7043e-21	-0.926239	0.229	0.424	4.63673e-17
Hells	1.72762e-21	-0.969482	0.036	0.174	4.70016e-17
Ube2ql1	1.81339e-21	-1.16879	0.043	0.183	4.93351e-17
Mthfs	1.85182e-21	-0.631225	0.144	0.33	5.03807e-17
Dpysl4	1.8672e-21	-2.80421	0.012	0.131	5.07991e-17
Gal3st1	1.87026e-21	-2.55334	0.017	0.139	5.08823e-17
Hoxc5	1.89295e-21	2.84499	0.136	0.057	5.14996e-17
Cntn3	1.90077e-21	-1.19055	0.083	0.241	5.17123e-17
Lrrfip1	1.91722e-21	-0.636392	0.105	0.28	5.216e-17
Trim37	1.93483e-21	-0.455859	0.188	0.399	5.26391e-17
Gli3	1.94639e-21	1.51366	0.195	0.095	5.29536e-17
2610316D01Rik	1.95246e-21	-2.2389	0.013	0.134	5.31185e-17
Lnx1	1.97464e-21	-1.94828	0.011	0.129	5.3722e-17
Agrn	2.01988e-21	-0.83418	0.08	0.239	5.49528e-17
Gm28050	2.07788e-21	-1.83439	0.013	0.134	5.65307e-17
Mkrn1	2.09837e-21	-0.352247	0.071	0.231	5.70883e-17
Dubr	2.12668e-21	-0.874282	0.056	0.205	5.78586e-17
Kcnb1	2.1276e-21	-0.787849	0.197	0.391	5.78835e-17
Txndc16	2.12803e-21	-0.625622	0.143	0.328	5.78951e-17
Gm14296	2.21034e-21	-0.567545	0.117	0.297	6.01344e-17
Gm13889	2.22643e-21	-0.960341	0.065	0.219	6.05723e-17
Gm29266	2.23448e-21	-3.06103	0.011	0.128	6.07913e-17
Azin2	2.25492e-21	-0.648429	0.112	0.289	6.13474e-17
Mir100hg	2.26424e-21	0.31269	0.777	0.641	6.1601e-17
Susd2	2.36778e-21	-0.797603	0.088	0.252	6.44178e-17
Tkt	2.38885e-21	-0.503282	0.228	0.447	6.49912e-17
Dnaaf10	2.39261e-21	-0.578454	0.18	0.386	6.50933e-17
Kcnk10	2.47484e-21	-2.21853	0.019	0.141	6.73306e-17
Clmn	2.48669e-21	1.36043	0.292	0.175	6.7653e-17
Scamp1	2.51482e-21	-0.384766	0.16	0.356	6.84181e-17
Wdtc1	2.80133e-21	-0.613165	0.076	0.238	7.6213e-17
Atp11b	2.85779e-21	-0.508402	0.173	0.374	7.7749e-17
Hoxc4	2.92709e-21	1.96306	0.313	0.213	7.96345e-17
C9orf72	2.9687e-21	-0.384808	0.141	0.332	8.07664e-17
Cyb5r3	3.00748e-21	-0.566211	0.096	0.265	8.18215e-17
Tbcel	3.00981e-21	-0.471783	0.149	0.341	8.1885e-17
Polr3g	3.2591e-21	-0.729932	0.064	0.217	8.8667e-17
Map9	3.28571e-21	-0.501502	0.084	0.247	8.93909e-17
Brinp1	3.29748e-21	-1.94023	0.031	0.161	8.97113e-17
Hoxd4	3.49784e-21	-0.791472	0.071	0.228	9.51622e-17
Zc3h14	3.51908e-21	-0.573944	0.131	0.313	9.57401e-17
Brms1l	3.52556e-21	-0.308892	0.115	0.294	9.59164e-17
Insyn2b	3.54711e-21	-2.49259	0.023	0.147	9.65027e-17
Gm42941	3.55562e-21	-2.41631	0.009	0.125	9.67341e-17
Tlx3	3.60816e-21	-1.06329	0.036	0.172	9.81635e-17
Tcea2	3.6241e-21	-0.991675	0.04	0.179	9.85972e-17
2700054A10Rik	3.64262e-21	2.76365	0.191	0.098	9.91011e-17
Pip4p2	3.78656e-21	-0.684032	0.131	0.31	1.03017e-16
Gars	3.9513e-21	-0.474233	0.165	0.365	1.07499e-16
Tango2	3.98678e-21	-0.522251	0.196	0.401	1.08464e-16
Sez6l2	4.20116e-21	-0.599487	0.084	0.249	1.14297e-16
Amd1	4.2551e-21	-0.474299	0.176	0.379	1.15764e-16
Gnpda2	4.41616e-21	-1.0525	0.055	0.2	1.20146e-16
Nsd2	4.44159e-21	-0.575152	0.195	0.404	1.20838e-16
Acaca	4.47629e-21	-0.57188	0.375	0.601	1.21782e-16
Wsb2	4.56812e-21	-0.529328	0.113	0.291	1.2428e-16
Tspyl4	4.58189e-21	-0.668075	0.159	0.349	1.24655e-16
Zfp608	4.60566e-21	-0.694576	0.291	0.504	1.25302e-16
Trim14	4.64799e-21	-2.81269	0.011	0.127	1.26453e-16
Lurap1l	4.9262e-21	-1.49729	0.023	0.148	1.34022e-16
Snx25	5.15464e-21	-0.514329	0.132	0.312	1.40237e-16
Fbxo8	5.17403e-21	-0.83826	0.057	0.205	1.40765e-16
Rnf19b	5.32e-21	-0.703369	0.048	0.19	1.44736e-16
Clstn1	5.37583e-21	-0.623726	0.3	0.523	1.46255e-16
Kcnq3	5.64488e-21	-1.71846	0.063	0.207	1.53575e-16
Macir	5.77152e-21	-0.719899	0.044	0.185	1.5702e-16
Gm13483	5.81158e-21	-1.11333	0.044	0.183	1.5811e-16
Plpp1	5.8815e-21	-0.60441	0.109	0.28	1.60012e-16
B4galt5	5.88585e-21	-0.570162	0.123	0.301	1.60131e-16
Gtf2a1	5.90296e-21	-0.349448	0.127	0.314	1.60596e-16
Rgcc	6.03764e-21	-1.57753	0.1	0.251	1.6426e-16
Elfn1	6.10865e-21	-1.63108	0.021	0.145	1.66192e-16
Minar1	6.54406e-21	-1.94004	0.027	0.153	1.78038e-16
Cdc14a	6.5454e-21	1.14765	0.357	0.237	1.78074e-16
Tnpo2	6.54628e-21	-0.440566	0.125	0.308	1.78098e-16
Tnr	6.62785e-21	-1.34179	0.047	0.186	1.80317e-16
Amigo1	6.65319e-21	-0.819777	0.052	0.195	1.81007e-16
Fmnl1	6.80368e-21	-1.11074	0.049	0.19	1.85101e-16
Epm2a	6.98037e-21	-1.20345	0.039	0.174	1.89908e-16
Pla2g6	6.99677e-21	-0.444949	0.035	0.168	1.90354e-16
Cbarp	7.11198e-21	-0.599751	0.079	0.239	1.93488e-16
Slc9a3r1	7.35856e-21	-1.86469	0.04	0.172	2.00197e-16
Rhoj	7.37662e-21	0.926455	0.331	0.203	2.00688e-16
Nipal2	7.39134e-21	-0.847131	0.059	0.206	2.01089e-16
Slc49a4	7.4429e-21	-0.475794	0.119	0.299	2.02492e-16
Kifc2	7.45195e-21	-0.515901	0.068	0.222	2.02738e-16
Tex2	7.64953e-21	-0.515257	0.216	0.433	2.08113e-16
Abhd4	7.8546e-21	-1.0457	0.063	0.211	2.13692e-16
Hsdl1	8.06721e-21	-0.682083	0.053	0.199	2.19476e-16
Mtmr9	8.09527e-21	-0.72734	0.1	0.268	2.2024e-16
Myef2	8.76353e-21	-0.421317	0.12	0.303	2.38421e-16
Gm46218	9.21024e-21	-1.20708	0.065	0.213	2.50574e-16
Stmn3	9.2624e-21	-0.664574	0.321	0.541	2.51993e-16
Zfp397	9.78814e-21	-0.65376	0.085	0.246	2.66296e-16
Snhg18	9.91578e-21	1.82489	0.151	0.066	2.69769e-16
Pigk	1.00638e-20	-0.485801	0.139	0.325	2.73796e-16
Slc25a13	1.01938e-20	-2.23713	0.037	0.165	2.77332e-16
Lypd6b	1.0322e-20	2.67118	0.184	0.094	2.8082e-16
Carns1	1.04362e-20	-2.32781	0.021	0.143	2.83929e-16
Rab4a	1.06103e-20	-0.996463	0.032	0.163	2.88663e-16
D430041D05Rik	1.06801e-20	-2.51096	0.035	0.162	2.90564e-16
Mtmr7	1.1088e-20	-0.587107	0.096	0.263	3.01659e-16
Grk2	1.11605e-20	-0.480348	0.157	0.348	3.03632e-16
Jak2	1.13134e-20	-0.573772	0.091	0.251	3.07793e-16
Matn4	1.20405e-20	-1.90953	0.04	0.17	3.27574e-16
Nagk	1.21867e-20	-0.359927	0.152	0.345	3.31552e-16
Tspan17	1.22498e-20	-0.441872	0.183	0.39	3.33269e-16
Tmem38a	1.22694e-20	-0.336028	0.095	0.262	3.338e-16
Bves	1.23331e-20	-1.51064	0.025	0.15	3.35534e-16
Cbl	1.24787e-20	-0.462256	0.232	0.451	3.39497e-16
Rab11a	1.25362e-20	-0.543407	0.144	0.329	3.4106e-16
Diablo	1.25467e-20	-0.448976	0.117	0.296	3.41345e-16
Mtus2	1.33086e-20	-0.835294	0.069	0.219	3.62074e-16
Tspan18	1.3597e-20	-1.09623	0.236	0.412	3.69919e-16
Mpnd	1.36229e-20	-0.577574	0.084	0.245	3.70624e-16
Zdhhc9	1.36332e-20	-0.644851	0.063	0.212	3.70906e-16
Ppip5k2	1.3954e-20	-0.351142	0.151	0.345	3.79632e-16
Ro60	1.41161e-20	-0.47251	0.095	0.264	3.84042e-16
Tiparp	1.43384e-20	-0.586712	0.091	0.253	3.90092e-16
Cpox	1.4591e-20	-0.940871	0.055	0.199	3.96963e-16
Capza2	1.48049e-20	-0.415876	0.145	0.333	4.02782e-16
Tpgs2	1.48602e-20	-0.669326	0.055	0.199	4.04288e-16
Tgm2	1.50809e-20	1.84474	0.107	0.039	4.10292e-16
Taldo1	1.51471e-20	-0.527189	0.103	0.271	4.12093e-16
Tlx2	1.56446e-20	-0.869454	0.048	0.188	4.25627e-16
Stk10	1.58956e-20	-1.53109	0.052	0.19	4.32457e-16
Col19a1	1.62235e-20	-1.70625	0.044	0.176	4.41376e-16
Rassf3	1.63056e-20	-1.23278	0.067	0.213	4.4361e-16
Gk	1.66793e-20	-0.486055	0.084	0.244	4.53776e-16
Arl2bp	1.66941e-20	-0.456086	0.093	0.258	4.5418e-16
Psmb2	1.67386e-20	-0.449743	0.192	0.398	4.5539e-16
Higd1a	1.67657e-20	-0.611729	0.083	0.241	4.56127e-16
Daam2	1.70008e-20	-1.27548	0.2	0.361	4.62523e-16
Sh3tc2	1.70518e-20	-1.95538	0.052	0.185	4.63911e-16
Faim	1.71686e-20	-1.11913	0.021	0.144	4.67088e-16
Pnkd	1.73044e-20	-0.659016	0.16	0.343	4.70783e-16
Cbx6	1.79754e-20	-0.473748	0.204	0.407	4.89038e-16
Hepacam	1.80658e-20	-2.73853	0.025	0.146	4.91498e-16
Ubqln1	1.81405e-20	-0.551972	0.135	0.317	4.93531e-16
Rbp1	1.87199e-20	1.78228	0.137	0.057	5.09294e-16
Ap1ar	1.8776e-20	-0.506193	0.161	0.35	5.1082e-16
Srxn1	1.89058e-20	-0.460354	0.093	0.259	5.1435e-16
Rragd	1.89073e-20	-0.875094	0.047	0.185	5.14391e-16
Pcx	1.89127e-20	-1.09597	0.101	0.26	5.14538e-16
Stt3b	1.93863e-20	-0.445732	0.18	0.38	5.27423e-16
Pfkm	1.96988e-20	-0.214367	0.101	0.274	5.35926e-16
Sh3glb2	2.08465e-20	-0.495134	0.149	0.336	5.67149e-16
Mib1	2.14458e-20	-0.364812	0.245	0.472	5.83455e-16
Cyp2j9	2.14934e-20	-1.85726	0.039	0.167	5.84748e-16
Plbd2	2.18372e-20	-0.792778	0.083	0.239	5.94103e-16
Rtf2	2.2543e-20	-0.369852	0.095	0.259	6.13306e-16
Nol4l	2.27429e-20	-0.488962	0.139	0.324	6.18744e-16
Mtmr4	2.34185e-20	-0.557835	0.065	0.215	6.37124e-16
Syn3	2.34434e-20	-0.939752	0.097	0.256	6.37801e-16
Txnrd1	2.38517e-20	-0.415959	0.125	0.305	6.48911e-16
Tmem151b	2.39906e-20	-1.1389	0.033	0.162	6.52687e-16
Tmem41b	2.41157e-20	-0.595269	0.087	0.246	6.56092e-16
Clcn3	2.45289e-20	-0.524116	0.288	0.517	6.67334e-16
Tnfrsf11a	2.45877e-20	-1.70066	0.031	0.157	6.68932e-16
Gm17482	2.4939e-20	-2.15187	0.007	0.116	6.78489e-16
Gde1	2.5319e-20	-0.697014	0.089	0.249	6.88829e-16
Lamp2	2.58823e-20	-0.391508	0.243	0.469	7.04154e-16
Galntl6	2.59104e-20	-1.88357	0.051	0.186	7.04919e-16
Pip5k1b	2.62253e-20	-1.01737	0.087	0.246	7.13486e-16
Cers6	2.66768e-20	1.32995	0.316	0.208	7.2577e-16
Dync1li2	2.68229e-20	-0.325699	0.231	0.447	7.29744e-16
Cdk5r1	2.70298e-20	-1.11582	0.036	0.167	7.35373e-16
Mal2	2.73077e-20	-1.07821	0.068	0.215	7.42934e-16
Mest	2.7494e-20	-1.52303	0.037	0.168	7.48001e-16
Zbtb10	2.75343e-20	-0.845845	0.045	0.182	7.49099e-16
Acsl3	2.8323e-20	-0.549087	0.119	0.293	7.70555e-16
Sash1	3.02989e-20	-0.933101	0.237	0.415	8.24311e-16
5730455P16Rik	3.04357e-20	-0.581111	0.104	0.271	8.28034e-16
Clcn6	3.08732e-20	-0.384434	0.103	0.272	8.39935e-16
Dync1li1	3.10522e-20	-0.246452	0.192	0.41	8.44807e-16
Gnb5	3.13344e-20	-0.510279	0.076	0.231	8.52485e-16
Sgsm3	3.17676e-20	-0.583533	0.067	0.216	8.64268e-16
Sgcb	3.20316e-20	-0.604217	0.069	0.22	8.71452e-16
Dtnb	3.27325e-20	-0.656668	0.185	0.375	8.90521e-16
Stip1	3.27739e-20	-0.450963	0.152	0.341	8.91647e-16
Dync1h1	3.49773e-20	-0.623109	0.475	0.676	9.51592e-16
Cfap20dc	3.52526e-20	-1.84413	0.016	0.132	9.59083e-16
Dbp	3.57246e-20	1.94285	0.191	0.097	9.71924e-16
Nim1k	3.65124e-20	-1.03131	0.028	0.153	9.93356e-16
Atrn	3.68023e-20	-0.524774	0.264	0.483	1.00124e-15
Brcc3	3.77394e-20	-0.611501	0.069	0.22	1.02674e-15
Dnajc13	3.86271e-20	-0.52839	0.252	0.468	1.05089e-15
Apbb1	3.87676e-20	-0.397904	0.12	0.295	1.05471e-15
Fam169a	3.903e-20	-0.848976	0.033	0.163	1.06185e-15
Spink10	4.04787e-20	-0.652112	0.048	0.186	1.10126e-15
Tmem62	4.21554e-20	-0.878587	0.041	0.175	1.14688e-15
Adar	4.23757e-20	-0.428823	0.137	0.322	1.15287e-15
Wdfy1	4.52058e-20	-0.384405	0.088	0.249	1.22987e-15
Ap3s2	4.52863e-20	-0.373088	0.135	0.317	1.23206e-15
Rdh11	4.64135e-20	-0.904274	0.04	0.173	1.26273e-15
St8sia3	4.66091e-20	-0.661917	0.065	0.213	1.26805e-15
Atp2c1	4.67322e-20	-0.53146	0.18	0.379	1.2714e-15
Rc3h1	4.67994e-20	-0.473423	0.249	0.472	1.27323e-15
Stxbp5l	4.80483e-20	-1.50656	0.063	0.202	1.3072e-15
Cdh4	4.81537e-20	-1.29998	0.048	0.183	1.31007e-15
Echdc1	4.85278e-20	-1.01716	0.079	0.229	1.32025e-15
Aagab	4.8844e-20	-0.960695	0.057	0.199	1.32885e-15
Celf6	5.01034e-20	-1.05812	0.044	0.177	1.36311e-15
Peli3	5.10556e-20	-1.09822	0.029	0.154	1.38902e-15
Tecpr1	5.20945e-20	-0.353258	0.175	0.376	1.41728e-15
Stxbp1	5.23271e-20	-0.590268	0.297	0.514	1.42361e-15
Arf3	5.25063e-20	-0.50619	0.181	0.375	1.42849e-15
Myo10	5.29537e-20	-0.806644	0.216	0.401	1.44066e-15
Mthfr	5.33381e-20	-0.609848	0.076	0.229	1.45112e-15
Cadm4	5.33866e-20	-1.17942	0.073	0.218	1.45244e-15
P2rx3	5.54019e-20	-2.49603	0.023	0.14	1.50726e-15
E230016M11Rik	5.73262e-20	-0.56252	0.101	0.266	1.55962e-15
Snx10	5.82705e-20	-0.456784	0.247	0.462	1.58531e-15
Dhx9	5.8403e-20	-0.365083	0.163	0.357	1.58891e-15
Sgtb	6.05666e-20	-0.573492	0.059	0.202	1.64778e-15
Insyn1	6.18566e-20	-1.25778	0.044	0.177	1.68287e-15
Tmx4	6.28869e-20	-0.464292	0.172	0.366	1.7109e-15
BC005537	6.41783e-20	-0.376817	0.251	0.474	1.74604e-15
Txnl1	6.48174e-20	-0.325328	0.127	0.306	1.76342e-15
Pcmt1	6.52535e-20	-0.411179	0.212	0.422	1.77529e-15
Efnb1	6.52574e-20	2.11379	0.195	0.102	1.77539e-15
Shroom2	6.62852e-20	1.25602	0.311	0.195	1.80336e-15
Pik3cd	6.74956e-20	-0.599468	0.081	0.237	1.83629e-15
Fbxw17	6.90159e-20	-0.60458	0.06	0.204	1.87765e-15
Ccnl2	6.93133e-20	1.23044	0.459	0.388	1.88574e-15
Frmd5	6.93407e-20	-0.391335	0.121	0.292	1.88648e-15
Cntnap4	6.9377e-20	-1.88862	0.029	0.151	1.88747e-15
Zfp385b	7.15654e-20	-1.08308	0.165	0.337	1.94701e-15
[truncated: 6,420 more rows]

## Sheet: FindMarkers_IMM_BC
	p_val	avg_log2FC	pct.1	pct.2	p_val_adj
Syk	0	6.08706	0.901	0.055	0
Pax5	0	8.08369	0.859	0.024	0
Bank1	0	7.35376	0.89	0.062	0
Ikzf3	0	7.27643	0.832	0.026	0
Ptprc	0	4.17603	0.817	0.073	0
Blnk	0	5.14748	0.759	0.051	0
Mir142hg	0	5.43817	0.723	0.042	0
Cd37	0	6.66762	0.696	0.023	0
Cd19	0	8.26006	0.665	0.007	0
Wdfy4	0	5.48803	0.712	0.058	0
Ms4a1	0	8.36265	0.649	0.008	0
Siglecg	0	7.72146	0.634	0.009	0
Btla	0	7.00399	0.628	0.033	0
Ighd	0	7.71927	0.602	0.011	0
Gm15987	0	5.89976	0.592	0.021	0
Cd79a	0	7.70443	0.565	0.011	0
Blk	0	8.21477	0.534	0.009	0
Iglc2	0	7.94052	0.497	0.005	0
Fam169b	0	5.85712	0.492	0.019	0
Napsa	0	6.67428	0.476	0.014	0
Iglc3	0	7.80855	0.461	0.005	0
Cd79b	0	8.11254	0.455	0.004	0
Cd22	0	6.93208	0.445	0.013	0
Pou2af1	0	7.66019	0.408	0.005	0
Zfp831	0	5.89794	0.403	0.015	0
H2-Ob	0	7.14259	0.382	0.008	0
Gm30211	0	7.55416	0.361	0.005	0
Gimap1	0	6.07136	0.335	0.01	0
Spib	0	7.94371	0.288	0.003	0
Cd2	0	6.99475	0.288	0.005	0
Gm43388	0	7.95252	0.267	0.004	0
5830428M24Rik	0	6.80854	0.251	0.006	0
Iglc1	0	7.01046	0.209	0.003	0
Gm15228	0	9.60528	0.126	0.001	0
Ighm	4.51077e-305	5.94079	0.869	0.101	1.2272e-300
Irag2	8.08141e-303	5.7401	0.487	0.026	2.19863e-298
Gm26740	2.71767e-301	4.40084	0.88	0.099	7.3937e-297
Haao	6.32139e-297	6.66124	0.262	0.007	1.7198e-292
4930426D05Rik	9.32136e-291	8.01921	0.168	0.002	2.53597e-286
Tbc1d10c	6.11486e-289	5.58759	0.419	0.02	1.66361e-284
Rhoh	1.93172e-285	5.61789	0.419	0.02	5.25542e-281
Ly6d	6.51492e-285	7.28929	0.162	0.002	1.77245e-280
H2-DMb2	3.21558e-284	7.1336	0.225	0.005	8.74832e-280
Slamf6	6.14621e-284	5.7211	0.314	0.011	1.67214e-279
Igkc	1.57227e-283	5.53142	0.586	0.043	4.27752e-279
Mndal	6.2941e-271	4.69847	0.785	0.085	1.71237e-266
A630001G21Rik	6.74623e-268	5.25572	0.581	0.045	1.83538e-263
2010309G21Rik	1.4121e-263	7.06801	0.257	0.007	3.84177e-259
Cmah	8.492e-262	5.33968	0.534	0.038	2.31033e-257
Atp2a3	7.31731e-253	5.4223	0.419	0.023	1.99075e-248
Cd72	1.53049e-248	6.21855	0.34	0.015	4.16385e-244
Mirt1	5.4706e-238	5.7915	0.346	0.016	1.48833e-233
Lyn	9.24729e-235	4.52539	0.916	0.15	2.51582e-230
Dock2	3.18711e-227	4.37477	0.906	0.149	8.67085e-223
Fcrl1	9.1369e-222	6.02918	0.251	0.009	2.48578e-217
Ikzf1	1.59275e-221	4.39068	0.723	0.087	4.33323e-217
Cd74	2.16089e-221	4.55809	0.707	0.084	5.87892e-217
Gimap3	2.90608e-219	5.20459	0.251	0.009	7.90629e-215
Arhgap30	4.67927e-217	4.71762	0.508	0.041	1.27304e-212
Irf4	2.37939e-216	7.05718	0.157	0.003	6.47338e-212
Ifi203	5.21839e-214	4.12773	0.634	0.066	1.41972e-209
Pld4	1.54958e-212	4.73005	0.372	0.021	4.21579e-208
Tspan32	1.66109e-210	5.21637	0.33	0.017	4.51916e-206
Ripor2	1.78614e-210	4.86435	0.88	0.158	4.85938e-206
Myo1g	4.48257e-209	4.83072	0.377	0.022	1.21953e-204
Gimap4	2.80613e-206	5.22316	0.267	0.011	7.63435e-202
Map4k1	5.1717e-205	5.66529	0.419	0.029	1.40701e-200
BE692007	1.38934e-204	6.24194	0.377	0.023	3.77985e-200
Fcrla	4.81669e-204	6.06414	0.309	0.015	1.31043e-199
Inpp5d	9.76045e-204	3.62833	0.691	0.083	2.65543e-199
Arhgap15	1.31814e-203	4.5818	0.979	0.218	3.58612e-199
Fcmr	3.95969e-201	7.17687	0.157	0.003	1.07727e-196
Niban3	8.61725e-198	6.33146	0.382	0.025	2.34441e-193
Kynu	5.52708e-194	5.63327	0.335	0.019	1.5037e-189
Apobec3	1.63605e-191	4.46954	0.681	0.09	4.45104e-187
AI506816	1.80332e-188	4.78456	0.524	0.051	4.90612e-184
Man1a	4.66755e-188	4.88759	0.806	0.141	1.26985e-183
Gimap6	1.51862e-187	5.25325	0.335	0.02	4.13157e-183
Il5ra	7.87841e-183	7.87462	0.188	0.006	2.1434e-178
Apbb1ip	2.5779e-182	3.87973	0.555	0.058	7.01344e-178
Arhgap45	6.63723e-182	4.24231	0.649	0.084	1.80572e-177
Ifi214	7.21474e-181	6.19592	0.152	0.004	1.96284e-176
E330020D12Rik	6.39419e-176	5.50476	0.272	0.014	1.7396e-171
Gm30054	2.47507e-174	6.04488	0.309	0.018	6.73368e-170
Traf3ip3	5.14129e-173	5.24303	0.356	0.025	1.39874e-168
Gimap8	5.63201e-173	4.91896	0.293	0.016	1.53225e-168
Evi2b	2.35747e-167	4.24501	0.414	0.034	6.41373e-163
Ccdc88c	1.03019e-166	4.39572	0.461	0.044	2.80274e-162
Bcl11a	3.13651e-166	5.10581	0.67	0.103	8.53318e-162
Fgd2	2.72566e-161	4.8828	0.429	0.039	7.41544e-157
Btk	1.57932e-158	4.77053	0.455	0.046	4.29668e-154
Card11	9.42714e-156	4.86501	0.602	0.086	2.56475e-151
Ptpn6	3.49462e-155	4.91587	0.398	0.035	9.50747e-151
Cytip	4.14335e-155	4.81017	0.277	0.016	1.12724e-150
Gm8369	2.37905e-154	5.82441	0.209	0.009	6.47245e-150
Fli1	5.55614e-154	3.59773	0.796	0.156	1.5116e-149
Hck	5.99225e-154	4.27972	0.435	0.041	1.63025e-149
A530032D15Rik	5.5778e-153	4.91366	0.351	0.027	1.5175e-148
Pou2f2	2.46657e-152	4.73351	0.717	0.133	6.71056e-148
Tnfrsf13b	3.36131e-152	6.23582	0.236	0.012	9.14479e-148
Tnfrsf13c	1.69318e-151	7.02605	0.141	0.004	4.60647e-147
H2-Q6	1.44219e-149	5.16672	0.267	0.016	3.92362e-145
4930523C07Rik	6.3581e-149	4.50304	0.482	0.054	1.72978e-144
Gm11342	4.49483e-148	6.37778	0.267	0.016	1.22286e-143
Rcsd1	4.2807e-147	3.99869	0.618	0.093	1.16461e-142
Cd180	8.49055e-147	4.88462	0.377	0.033	2.30994e-142
Sp140	3.07634e-145	4.49033	0.44	0.046	8.3695e-141
Klhl14	5.42651e-145	7.19566	0.23	0.012	1.47634e-140
Stap1	5.51215e-144	5.43123	0.272	0.017	1.49964e-139
Zfp981	9.04416e-144	5.34597	0.351	0.029	2.46056e-139
Ifi209	1.59814e-143	4.99447	0.225	0.011	4.3479e-139
Tmem163	3.79726e-143	4.71113	0.806	0.195	1.03308e-138
Gimap7	3.20169e-142	6.48125	0.11	0.002	8.71051e-138
Acap1	1.36601e-141	5.38996	0.225	0.012	3.71638e-137
Fcer2a	4.08077e-141	7.39874	0.147	0.005	1.11021e-136
Arhgap25	2.79462e-137	3.93714	0.466	0.054	7.60303e-133
Cd38	1.17692e-136	4.96458	0.319	0.025	3.20193e-132
Ccnd3	4.47849e-132	3.99551	0.885	0.274	1.21842e-127
Slc28a2	7.17918e-132	5.45766	0.22	0.012	1.95317e-127
Zbtb32	8.76468e-132	7.64484	0.115	0.003	2.38452e-127
Sp100	6.80304e-131	3.45528	0.702	0.138	1.85084e-126
Plcg2	5.14698e-130	4.16148	0.597	0.099	1.40029e-125
Dock8	2.91433e-128	3.5188	0.733	0.158	7.92873e-124
Ciita	7.49543e-128	4.47198	0.335	0.029	2.03921e-123
Grap2	8.059e-127	4.36924	0.33	0.029	2.19253e-122
Ly6e	1.05649e-126	3.94861	0.482	0.063	2.87429e-122
Chst3	1.26478e-126	4.2728	0.571	0.093	3.44095e-122
Nedd9	1.3595e-124	4.03204	0.832	0.244	3.69866e-120
AU020206	1.96549e-123	3.95078	0.539	0.082	5.34731e-119
Gvin1	5.601e-122	3.15826	0.508	0.07	1.52381e-117
Cyp4f18	3.48494e-121	5.40858	0.188	0.009	9.48113e-117
Inpp4b	5.85934e-121	4.30294	0.691	0.151	1.59409e-116
H2-DMb1	2.42163e-120	4.53585	0.319	0.028	6.58829e-116
Rftn1	2.52888e-118	3.86663	0.602	0.108	6.88007e-114
Birc3	2.73861e-118	4.14297	0.613	0.116	7.45066e-114
Irf8	2.07411e-117	4.26741	0.33	0.031	5.64281e-113
Dpp4	6.33394e-116	4.6736	0.298	0.026	1.72321e-111
Ltb	2.07242e-115	6.33255	0.12	0.004	5.63823e-111
Ffar1	3.87555e-115	7.01257	0.105	0.003	1.05438e-110
Sla	5.16796e-115	4.91903	0.257	0.019	1.40599e-110
Cd53	6.34804e-113	4.23883	0.262	0.02	1.72705e-108
Aff3	4.23532e-110	3.31485	0.953	0.511	1.15226e-105
Plac8	1.14919e-109	4.46107	0.209	0.013	3.12648e-105
Hvcn1	3.54269e-109	5.29532	0.267	0.022	9.63823e-105
Arhgdib	1.07173e-108	4.34446	0.304	0.028	2.91576e-104
Fcgr2b	4.35575e-106	4.25057	0.293	0.027	1.18503e-101
Prkcb	2.02106e-105	3.32779	0.869	0.334	5.49848e-101
Itga4	6.16804e-105	3.87229	0.571	0.11	1.67808e-100
Gvin2	1.61173e-104	3.17869	0.476	0.071	4.38486e-100
Sell	9.16332e-103	5.12713	0.168	0.009	2.49297e-98
Pik3ap1	2.34728e-102	3.72708	0.435	0.061	6.38602e-98
Ralgps2	6.62476e-102	3.54595	0.832	0.3	1.80233e-97
Lsp1	8.69821e-102	3.94981	0.34	0.038	2.36644e-97
AI662270	1.47602e-101	4.26494	0.283	0.026	4.01566e-97
H2-Ab1	4.61625e-100	4.24613	0.346	0.04	1.2559e-95
Ptk2b	1.2378e-99	3.82874	0.607	0.132	3.36756e-95
9930111J21Rik2	2.59343e-99	4.10151	0.366	0.045	7.05569e-95
Gimap9	1.37003e-98	5.53632	0.12	0.005	3.7273e-94
Cacna1e	1.96337e-98	4.95015	0.518	0.097	5.34155e-94
H2-Q7	4.46705e-98	4.03843	0.351	0.042	1.21531e-93
Marchf1	8.64379e-98	3.90151	0.623	0.145	2.35163e-93
Grap	1.89003e-94	5.513	0.152	0.008	5.14201e-90
Dapp1	1.88885e-91	4.21213	0.309	0.035	5.13882e-87
Ets1	2.22563e-91	4.05895	0.539	0.112	6.05505e-87
Foxp1	4.1743e-91	2.78608	0.974	0.691	1.13566e-86
Unc93b1	7.79524e-91	3.7	0.503	0.094	2.12077e-86
H2-Eb1	1.09556e-90	4.10179	0.351	0.045	2.98059e-86
Rac2	1.5433e-88	4.50335	0.178	0.012	4.19871e-84
Rasgrp2	3.93416e-88	3.90488	0.361	0.049	1.07033e-83
Cd84	1.92901e-87	2.59878	0.351	0.044	5.24807e-83
Ap1s3	1.70669e-86	5.08308	0.319	0.04	4.64323e-82
Tlr1	1.88046e-85	5.00441	0.131	0.006	5.11598e-81
Tnfaip8	3.44192e-84	3.74658	0.455	0.082	9.36408e-80
1700027J07Rik	4.42034e-84	5.90298	0.225	0.02	1.2026e-79
Dok3	5.02485e-84	4.85528	0.403	0.066	1.36706e-79
Sp110	1.09385e-83	3.73283	0.356	0.049	2.97592e-79
Gm12185	4.45241e-83	3.86908	0.403	0.065	1.21132e-78
Swap70	9.67497e-83	3.78436	0.55	0.126	2.63217e-78
St8sia4	4.19959e-82	3.70096	0.393	0.061	1.14254e-77
Cd52	9.31977e-82	4.69807	0.236	0.023	2.53554e-77
Trp53i11	6.60725e-80	4.2607	0.267	0.029	1.79757e-75
Stk17b	1.33332e-79	4.5486	0.298	0.037	3.62742e-75
Rnase6	2.58458e-79	5.11817	0.11	0.005	7.03161e-75
B3gnt5	3.41604e-79	4.07921	0.288	0.034	9.29368e-75
Malt1	3.17544e-78	3.77858	0.597	0.163	8.63911e-74
Gpr183	3.30974e-78	5.08124	0.152	0.01	9.00448e-74
Kmo	3.8563e-78	5.17762	0.136	0.008	1.04914e-73
Mef2c	9.20251e-78	3.44098	0.749	0.281	2.50363e-73
Ebf1	7.04189e-77	2.50733	0.958	0.61	1.91582e-72
Ptpn22	4.12894e-76	4.73966	0.414	0.076	1.12332e-71
ENSMUSG00000079190	9.66962e-76	5.29622	0.162	0.011	2.63072e-71
Rubcnl	2.29793e-75	4.87848	0.262	0.03	6.25174e-71
Il2rg	2.18607e-74	5.30977	0.157	0.011	5.94742e-70
Lax1	3.75354e-74	5.54647	0.162	0.012	1.02119e-69
Zc3h12d	3.84152e-73	5.27025	0.188	0.016	1.04512e-68
Bin2	9.87812e-73	3.91177	0.204	0.019	2.68744e-68
Fcrl5	4.23219e-72	5.6427	0.22	0.022	1.15141e-67
H2-Aa	4.9858e-72	3.81493	0.288	0.038	1.35644e-67
Gm42031	1.05054e-71	5.13979	0.147	0.01	2.85809e-67
Bach2	1.68627e-71	2.95949	0.901	0.579	4.58766e-67
H2-K1	4.65459e-71	2.97522	0.717	0.267	1.26633e-66
St3gal1	6.37077e-71	4.22691	0.476	0.109	1.73323e-66
Foxn3	2.05983e-70	2.46259	0.906	0.612	5.60398e-66
Baz1a	2.55544e-70	3.22774	0.618	0.189	6.95234e-66
Arhgap4	8.60209e-70	4.13351	0.351	0.058	2.34028e-65
Acp5	4.08163e-69	4.65292	0.147	0.01	1.11045e-64
Ptprj	7.22501e-69	2.75437	0.817	0.375	1.96564e-64
Elf4	1.58111e-68	3.30643	0.403	0.075	4.30156e-64
Nrros	1.05283e-67	3.18422	0.361	0.061	2.86433e-63
Helz2	1.55064e-67	4.15816	0.277	0.037	4.21866e-63
Ankrd44	1.5771e-67	2.71481	0.806	0.396	4.29066e-63
Rbms3	6.55018e-67	-2.90829	0.393	0.874	1.78204e-62
BC035044	1.0388e-66	4.69556	0.199	0.02	2.82617e-62
Arhgef18	1.14694e-66	3.65372	0.702	0.294	3.12037e-62
Dst	1.30326e-66	-2.15686	0.455	0.933	3.54566e-62
Plcl2	1.30935e-66	2.95017	0.586	0.172	3.56222e-62
Cd48	2.17431e-66	3.66603	0.225	0.025	5.91542e-62
Plekha2	6.67478e-66	3.48363	0.571	0.171	1.81594e-61
Dennd1c	8.19819e-66	4.1315	0.215	0.023	2.2304e-61
Ctsh	9.88856e-66	3.30441	0.33	0.052	2.69028e-61
Abi3	1.56103e-65	3.85801	0.209	0.022	4.24693e-61
Samd9l	3.52383e-65	3.61538	0.429	0.091	9.58692e-61
Il21r	6.22001e-65	5.03888	0.141	0.01	1.69221e-60
Arl5c	1.82089e-64	4.77647	0.162	0.013	4.95392e-60
Cnr2	1.67249e-63	5.35698	0.162	0.014	4.55017e-59
Gmfg	3.27681e-63	4.73957	0.147	0.011	8.91489e-59
Dgkd	4.58264e-63	3.42904	0.67	0.269	1.24675e-58
Fam111a	5.31413e-62	4.02118	0.33	0.057	1.44576e-57
Hepacam2	8.57605e-62	5.87599	0.141	0.011	2.3332e-57
Serinc3	1.01965e-61	2.6254	0.77	0.386	2.77407e-57
Trim30a	1.30013e-61	3.27307	0.393	0.079	3.53714e-57
Gm26510	8.90923e-61	4.10829	0.272	0.039	2.42385e-56
Cyb561a3	9.57126e-61	4.73294	0.309	0.051	2.60396e-56
Vav1	1.98584e-60	3.96753	0.225	0.027	5.40267e-56
Ctse	2.96025e-60	3.99905	0.283	0.043	8.05366e-56
Cybb	3.1517e-60	3.22528	0.272	0.039	8.57452e-56
C130026I21Rik	4.23101e-60	4.32941	0.476	0.126	1.15109e-55
Slc14a1	5.23164e-60	4.84799	0.162	0.014	1.42332e-55
Prkg1	6.85049e-60	-3.19029	0.366	0.85	1.86374e-55
Snx30	1.66775e-59	3.26937	0.555	0.17	4.53728e-55
Adgre5	2.18951e-59	3.52927	0.408	0.089	5.95679e-55
Kcnq5	4.32487e-59	2.56479	0.696	0.282	1.17662e-54
Slc9a7	6.78917e-57	3.82237	0.555	0.185	1.84706e-52
ENSMUSG00000079222	1.19952e-56	5.3728	0.12	0.008	3.26341e-52
Auts2	1.30509e-56	-2.77827	0.225	0.815	3.55064e-52
Akna	3.25717e-56	4.26573	0.236	0.032	8.86145e-52
Itpr1	3.87192e-56	3.25384	0.67	0.289	1.05339e-51
Kif21a	1.18956e-55	-2.54614	0.288	0.828	3.23632e-51
Ncf4	1.38917e-55	4.17885	0.168	0.017	3.77938e-51
Ly86	1.04708e-54	2.85497	0.576	0.194	2.84868e-50
Kif1b	2.35821e-54	-1.96374	0.403	0.883	6.41574e-50
Elmo1	2.49773e-54	1.78816	0.843	0.465	6.79534e-50
Pkig	4.90526e-54	3.10002	0.644	0.268	1.33452e-49
Ncf1	1.24253e-53	3.84576	0.215	0.028	3.38042e-49
Csmd1	4.61231e-53	-3.41723	0.429	0.854	1.25482e-48
Cpm	9.78306e-53	5.39438	0.168	0.018	2.66158e-48
Mtss1	2.07422e-52	2.44259	0.77	0.438	5.64311e-48
Cd40	3.92431e-52	5.17475	0.157	0.016	1.06765e-47
ENSMUSG00000079808	4.23383e-52	4.6664	0.157	0.016	1.15186e-47
ENSMUSG00000095500	4.62975e-51	5.49935	0.12	0.009	1.25957e-46
Slc12a6	3.50869e-50	2.70902	0.728	0.412	9.54574e-46
Itpr2	9.5727e-50	2.77783	0.565	0.198	2.60435e-45
Ppp1r16b	4.34641e-49	3.57427	0.429	0.118	1.18248e-44
Cr2	1.88002e-48	6.48894	0.126	0.011	5.1148e-44
Cadm1	2.57944e-48	-2.67955	0.277	0.788	7.01763e-44
Lamb3	2.78237e-48	4.25876	0.283	0.052	7.56973e-44
Agbl1	5.3427e-48	5.6489	0.435	0.127	1.45353e-43
Adgrl3	7.91021e-48	-3.99913	0.131	0.684	2.15205e-43
Cyrib	1.01464e-47	2.34272	0.733	0.41	2.76042e-43
Xylt1	2.07988e-47	2.75662	0.576	0.214	5.65851e-43
Lat2	2.82517e-47	3.92114	0.22	0.033	7.68616e-43
Lsamp	3.76941e-47	-3.37346	0.304	0.772	1.0255e-42
Pecam1	4.03463e-46	3.00268	0.555	0.211	1.09766e-41
Runx1	4.2666e-46	1.94629	0.759	0.399	1.16077e-41
Slamf7	7.07725e-45	3.60045	0.157	0.018	1.92544e-40
Mcoln2	1.13956e-44	5.01689	0.183	0.024	3.10029e-40
Aff1	1.64462e-44	2.47238	0.717	0.407	4.47436e-40
Stard13	1.80178e-44	-4.07384	0.136	0.678	4.90193e-40
Luzp2	7.75941e-44	-3.68076	0.131	0.663	2.11102e-39
Mir99ahg	8.24355e-44	-3.37713	0.178	0.715	2.24274e-39
Rasal3	9.21921e-44	4.02037	0.141	0.015	2.50818e-39
Sgcd	1.63577e-43	-2.78448	0.209	0.742	4.45027e-39
Pml	1.89116e-43	3.50569	0.372	0.096	5.1451e-39
Ank2	2.82143e-43	-2.38052	0.44	0.837	7.67599e-39
Frmd4a	2.85804e-43	-3.08504	0.194	0.706	7.77559e-39
Cmtm7	4.39825e-43	3.23263	0.304	0.064	1.19659e-38
Sorbs1	8.47464e-43	-2.39911	0.225	0.762	2.30561e-38
Samhd1	9.0017e-43	2.48353	0.639	0.31	2.449e-38
Trim2	9.07298e-43	-2.90564	0.131	0.681	2.46839e-38
Nfatc1	1.41239e-42	3.28397	0.361	0.092	3.84255e-38
Gm32401	1.506e-42	4.96679	0.115	0.01	4.09723e-38
Cd86	2.86178e-42	3.85698	0.173	0.023	7.78576e-38
Itgb7	2.87318e-42	3.85863	0.157	0.019	7.81677e-38
Clec2i	4.56387e-42	4.39268	0.126	0.012	1.24165e-37
Susd1	5.03548e-42	4.74584	0.246	0.045	1.36995e-37
Fmnl2	5.06788e-42	-2.41784	0.188	0.735	1.37877e-37
Akap13	6.56175e-42	2.07487	0.785	0.585	1.78519e-37
Pcdh9	8.59168e-42	-2.59094	0.304	0.782	2.33745e-37
Klf7	1.2476e-41	-1.84765	0.335	0.812	3.39422e-37
Ctnnd2	1.92452e-41	-4.14359	0.136	0.649	5.23586e-37
Myo1e	2.7204e-41	2.1496	0.738	0.472	7.40112e-37
Chst15	7.61805e-41	3.02277	0.487	0.174	2.07257e-36
Gm20559	8.18262e-41	2.88703	0.429	0.131	2.22616e-36
Tbc1d1	1.35496e-40	3.00438	0.524	0.209	3.68631e-36
Mir100hg	1.55398e-40	-3.29975	0.12	0.652	4.22777e-36
Edil3	2.13898e-40	-3.07233	0.173	0.677	5.81931e-36
Ctss	2.67249e-40	2.63194	0.288	0.06	7.27078e-36
Rora	3.29402e-40	-3.24564	0.162	0.678	8.9617e-36
Tln2	4.16466e-40	-2.51983	0.162	0.687	1.13304e-35
Arhgef1	6.93085e-40	2.45675	0.665	0.368	1.88561e-35
Srgn	9.10782e-40	3.43115	0.236	0.043	2.47787e-35
Tut4	1.01921e-39	2.35322	0.696	0.419	2.77285e-35
Il1rapl1	2.13716e-39	-3.31453	0.12	0.622	5.81437e-35
Ncam1	2.26382e-39	-3.49688	0.136	0.64	6.15894e-35
Cd83	3.00698e-39	4.80473	0.168	0.023	8.18079e-35
App	6.73057e-39	-1.96904	0.267	0.763	1.83112e-34
Rasa3	1.24637e-38	2.28075	0.665	0.332	3.39087e-34
Filip1l	1.35332e-38	3.23204	0.471	0.175	3.68183e-34
Magi2	1.58583e-38	-2.37902	0.246	0.725	4.3144e-34
Trim34a	1.6406e-38	3.64746	0.246	0.048	4.46342e-34
Nfia	1.8257e-38	-2.41545	0.262	0.742	4.967e-34
Agap1	1.86885e-38	-2.89019	0.115	0.64	5.08438e-34
Slc4a4	3.26541e-38	-3.42963	0.105	0.621	8.88388e-34
Nckap1l	3.64132e-38	3.13568	0.204	0.033	9.90658e-34
Trim5	4.84672e-38	3.59298	0.246	0.049	1.3186e-33
Pde4d	5.51533e-38	-2.65013	0.204	0.704	1.5005e-33
Pex5l	6.14524e-38	-2.9536	0.12	0.632	1.67187e-33
Rasgrp3	9.16461e-38	3.30912	0.22	0.039	2.49332e-33
Aim2	1.94825e-37	3.45784	0.267	0.057	5.30042e-33
Plcb2	3.99547e-37	4.01309	0.131	0.015	1.08701e-32
Lrch1	5.1657e-37	2.12253	0.702	0.425	1.40538e-32
Cdh11	5.64485e-37	-3.6755	0.084	0.584	1.53574e-32
Itgal	8.63993e-37	3.24108	0.152	0.02	2.35058e-32
Prkn	1.38293e-36	-2.33584	0.199	0.684	3.7624e-32
Gimap5	2.70915e-36	4.3434	0.136	0.017	7.37052e-32
Magi1	3.16957e-36	-2.06117	0.183	0.689	8.62313e-32
Fgd3	3.20283e-36	3.72537	0.199	0.034	8.71361e-32
Snx20	4.32358e-36	4.10776	0.115	0.012	1.17627e-31
Cdc42bpa	4.8228e-36	-2.59227	0.12	0.632	1.31209e-31
Dlgap1	9.33109e-36	-2.90857	0.173	0.645	2.53862e-31
Enox1	1.00271e-35	-3.86435	0.079	0.567	2.72797e-31
Ehbp1	1.22009e-35	-2.01003	0.22	0.725	3.31937e-31
Dmd	2.00302e-35	-2.76076	0.22	0.685	5.44943e-31
Mapt	3.49858e-35	-2.48856	0.178	0.651	9.51825e-31
Aopep	4.0539e-35	-1.80527	0.298	0.756	1.1029e-30
Tmem131l	4.67568e-35	2.61326	0.592	0.3	1.27206e-30
Irf2	8.87676e-35	2.06894	0.707	0.452	2.41501e-30
Trio	9.03743e-35	-2.11714	0.157	0.661	2.45872e-30
Csk	1.2383e-34	3.21577	0.497	0.212	3.36891e-30
Tanc2	1.29609e-34	-2.13977	0.188	0.684	3.52613e-30
Uvrag	1.31138e-34	2.16838	0.686	0.441	3.56774e-30
Tmod2	3.37692e-34	-2.32782	0.115	0.623	9.18726e-30
Trim12a	3.94049e-34	2.82597	0.366	0.11	1.07205e-29
Dock7	6.313e-34	-2.71368	0.105	0.595	1.71751e-29
Tenm3	9.8314e-34	-2.78163	0.115	0.599	2.67473e-29
Ero1b	1.05924e-33	3.70505	0.346	0.103	2.88177e-29
Tmtc2	1.52005e-33	-3.02272	0.136	0.612	4.13544e-29
Nkain2	1.52834e-33	-2.0362	0.209	0.69	4.158e-29
Immp2l	2.01355e-33	2.8341	0.66	0.4	5.47805e-29
Mbnl1	4.61947e-33	1.46556	0.812	0.651	1.25677e-28
Mdga2	9.70781e-33	-3.03366	0.147	0.595	2.64111e-28
Ptprt	1.69081e-32	-3.06394	0.162	0.608	4.60001e-28
Trim7	2.74428e-32	3.63764	0.304	0.083	7.46608e-28
Rbms1	3.12923e-32	-1.59812	0.476	0.835	8.51339e-28
Grik2	4.8081e-32	-4.08391	0.079	0.536	1.30809e-27
Macf1	5.30507e-32	1.89043	0.812	0.71	1.4433e-27
Piezo2	7.52843e-32	-2.43131	0.251	0.68	2.04819e-27
Il17ra	1.06789e-31	3.44844	0.236	0.052	2.90529e-27
Rel	1.08706e-31	3.33174	0.33	0.097	2.95747e-27
Itsn2	1.46451e-31	1.6675	0.759	0.594	3.98435e-27
Stat4	1.67013e-31	4.29721	0.178	0.031	4.54376e-27
Fermt2	1.845e-31	-3.07769	0.063	0.529	5.01951e-27
St8sia6	2.41199e-31	4.06629	0.194	0.036	6.56206e-27
9330159F19Rik	2.70752e-31	-3.99228	0.042	0.492	7.36608e-27
Cacna1i	3.7693e-31	3.88582	0.215	0.045	1.02548e-26
Rbfox2	3.81848e-31	-2.08181	0.173	0.647	1.03886e-26
Klhl6	4.14519e-31	3.61435	0.157	0.025	1.12774e-26
Lrrc4c	4.87107e-31	-3.8679	0.084	0.536	1.32522e-26
Galnt17	5.16046e-31	-2.66685	0.131	0.586	1.40395e-26
Zfp462	6.11086e-31	-2.68666	0.084	0.542	1.66252e-26
Stk10	7.4042e-31	2.40899	0.455	0.181	2.01439e-26
Dennd3	7.61564e-31	3.83221	0.204	0.041	2.07191e-26
S1pr1	1.16531e-30	3.35204	0.241	0.055	3.17034e-26
Kif21b	1.28312e-30	3.67732	0.257	0.063	3.49085e-26
Lifr	1.33884e-30	-2.01175	0.194	0.653	3.64245e-26
Hspa12a	1.64647e-30	-2.23813	0.141	0.606	4.47939e-26
Med13	1.83813e-30	2.10493	0.644	0.409	5.0008e-26
Baz2b	2.36331e-30	1.41821	0.827	0.703	6.42963e-26
Dtna	2.63953e-30	-2.65135	0.099	0.557	7.1811e-26
Fgfr1	2.82851e-30	-2.58759	0.099	0.564	7.69525e-26
Sh3bp5	3.57784e-30	2.47361	0.492	0.213	9.73388e-26
Aatk	3.69145e-30	-2.623	0.099	0.558	1.0043e-25
Igf1r	7.65078e-30	-2.10843	0.178	0.641	2.08147e-25
Shisa5	9.41452e-30	3.42066	0.361	0.123	2.56131e-25
Dennd5b	9.56479e-30	2.41274	0.607	0.35	2.6022e-25
Arhgap39	1.0966e-29	-2.53455	0.136	0.591	2.98342e-25
Grid2	1.11313e-29	-3.62006	0.105	0.535	3.02837e-25
Srgap3	1.1237e-29	-2.2692	0.12	0.578	3.05713e-25
Ank3	1.2067e-29	-2.37147	0.309	0.699	3.28294e-25
Dpyd	1.22344e-29	-3.3648	0.084	0.522	3.3285e-25
Farp1	1.35713e-29	-3.70543	0.037	0.476	3.6922e-25
Adgrb3	1.61399e-29	-4.20619	0.126	0.553	4.39101e-25
Eepd1	2.22433e-29	-3.0257	0.094	0.537	6.0515e-25
Prune2	2.25029e-29	-2.30766	0.356	0.708	6.12214e-25
Sh3kbp1	2.47698e-29	1.66337	0.696	0.454	6.73887e-25
Zfhx3	2.55937e-29	-1.77898	0.272	0.715	6.96303e-25
Macrod2	3.24528e-29	-2.47944	0.209	0.632	8.8291e-25
Mboat2	3.31303e-29	-3.76115	0.052	0.486	9.01342e-25
Adcy7	5.19777e-29	2.89233	0.277	0.074	1.4141e-24
Hcls1	5.64718e-29	4.12572	0.105	0.012	1.53637e-24
Tgfbr3	6.83631e-29	-2.56809	0.131	0.576	1.85989e-24
Arhgap17	8.72062e-29	1.99616	0.654	0.434	2.37253e-24
Slc35f1	9.41745e-29	-3.59438	0.131	0.554	2.56211e-24
H2-Q4	1.00223e-28	3.32943	0.22	0.049	2.72667e-24
Sptbn1	1.02079e-28	-1.04596	0.639	0.917	2.77717e-24
Fam107b	1.02167e-28	2.92854	0.487	0.228	2.77954e-24
Cadm2	1.02691e-28	-3.30884	0.084	0.513	2.7938e-24
Nav1	1.17057e-28	-2.66155	0.131	0.556	3.18467e-24
Fchsd2	1.39214e-28	2.63209	0.639	0.431	3.78745e-24
Soga3	1.86103e-28	-2.44354	0.105	0.545	5.06312e-24
Irak2	2.17816e-28	2.78569	0.356	0.12	5.92592e-24
Stox2	2.82924e-28	-2.67281	0.11	0.55	7.69724e-24
Dclk1	2.85677e-28	-2.95033	0.084	0.522	7.77214e-24
Ptn	3.53074e-28	-2.88815	0.047	0.482	9.60574e-24
Plcb4	3.74611e-28	-2.62598	0.115	0.553	1.01917e-23
Ube2e2	6.2425e-28	-3.16499	0.079	0.5	1.69834e-23
Large1	7.86746e-28	-1.86547	0.173	0.619	2.14042e-23
Csmd2	1.0024e-27	-3.69456	0.052	0.472	2.72712e-23
Gcnt2	1.51517e-27	-2.39861	0.11	0.541	4.12216e-23
Slco3a1	2.01e-27	-3.70268	0.042	0.461	5.4684e-23
Kif1a	2.03361e-27	-1.8125	0.209	0.639	5.53263e-23
Kcnb2	2.82589e-27	-3.32505	0.215	0.585	7.68811e-23
Nfib	3.91725e-27	-2.56042	0.136	0.563	1.06573e-22
Pam	4.09436e-27	-2.48876	0.131	0.555	1.11391e-22
Cyba	4.96078e-27	2.91573	0.162	0.029	1.34963e-22
Cux1	5.18895e-27	1.73068	0.717	0.555	1.41171e-22
Nek1	5.92843e-27	-2.0424	0.162	0.6	1.61289e-22
Neurl3	6.25981e-27	4.04846	0.11	0.014	1.70304e-22
Pclo	6.74775e-27	-2.00025	0.136	0.552	1.83579e-22
Tgfb1	7.83292e-27	3.41952	0.194	0.041	2.13102e-22
Pbx1	1.16864e-26	-1.97744	0.173	0.618	3.17939e-22
Edaradd	1.34238e-26	5.21596	0.11	0.015	3.65208e-22
Scml4	1.35999e-26	3.85694	0.335	0.117	3.7e-22
Ptpn13	1.45538e-26	-2.97296	0.084	0.5	3.9595e-22
Astn2	1.58251e-26	-3.59633	0.089	0.491	4.30537e-22
Camk1d	1.86794e-26	1.24812	0.895	0.817	5.08191e-22
Dnajc6	1.94666e-26	-2.9513	0.052	0.47	5.29608e-22
Rims2	2.19649e-26	-3.10049	0.068	0.478	5.97576e-22
H2-D1	2.28914e-26	2.37632	0.487	0.23	6.22783e-22
Nav3	2.4686e-26	-3.26577	0.12	0.527	6.71608e-22
ENSMUSG00000079800	2.86587e-26	4.71273	0.136	0.022	7.79688e-22
Rgl1	3.10785e-26	-2.71251	0.073	0.496	8.4552e-22
Tnrc6b	3.85577e-26	1.10864	0.822	0.768	1.049e-21
Ctif	4.94664e-26	-2.73208	0.068	0.486	1.34578e-21
Ppp2r3a	7.75641e-26	-2.65621	0.099	0.515	2.11021e-21
Ash1l	8.05201e-26	1.34677	0.775	0.657	2.19063e-21
Prickle2	8.53973e-26	-2.86321	0.058	0.467	2.32332e-21
Tgfbr2	1.04205e-25	2.11942	0.513	0.245	2.83501e-21
Tshz2	1.08528e-25	-2.2673	0.304	0.676	2.95261e-21
Klhl29	1.09043e-25	-3.03261	0.094	0.497	2.96662e-21
Il10ra	1.33666e-25	3.57055	0.147	0.026	3.63652e-21
Sipa1	1.59724e-25	2.65632	0.314	0.101	4.34546e-21
Fam219a	1.65694e-25	-1.78844	0.136	0.574	4.50787e-21
Nckap1	1.80576e-25	-1.73323	0.168	0.607	4.91276e-21
Me1	1.90328e-25	-3.10218	0.052	0.455	5.17807e-21
Lgr4	1.92986e-25	-3.53336	0.047	0.447	5.25036e-21
Srgap1	1.96068e-25	-2.73114	0.094	0.499	5.33424e-21
Foxo1	3.23158e-25	1.78665	0.602	0.338	8.79183e-21
Apbb2	3.24844e-25	-1.90422	0.168	0.59	8.83771e-21
Snhg11	3.54537e-25	-2.92937	0.209	0.575	9.64554e-21
Myo9a	4.31354e-25	-1.34541	0.288	0.702	1.17354e-20
Wdfy3	4.63656e-25	-2.05811	0.126	0.552	1.26142e-20
Ptprf	5.0965e-25	-1.78007	0.162	0.6	1.38655e-20
Man2a1	5.30648e-25	2.32081	0.45	0.205	1.44368e-20
Ddx5	5.48659e-25	1.27941	0.806	0.759	1.49268e-20
Cntrl	6.70058e-25	2.36259	0.508	0.271	1.82296e-20
Ncam2	6.95564e-25	-4.02608	0.089	0.474	1.89235e-20
Abca8a	7.25624e-25	-4.11143	0.068	0.45	1.97413e-20
Plxdc2	8.38533e-25	-2.49312	0.115	0.516	2.28131e-20
Cd80	8.72049e-25	3.71753	0.162	0.032	2.3725e-20
Ppp2r2b	9.57561e-25	-2.98616	0.099	0.489	2.60514e-20
Snx7	9.68932e-25	-4.3047	0.026	0.408	2.63608e-20
Bmpr2	9.73078e-25	-1.79885	0.136	0.56	2.64736e-20
Cbfa2t3	9.87913e-25	3.07717	0.288	0.09	2.68772e-20
9530059O14Rik	1.01422e-24	-3.25294	0.152	0.522	2.75928e-20
A230057D06Rik	1.13668e-24	-3.45382	0.073	0.459	3.09245e-20
Acyp2	1.14005e-24	-2.09449	0.12	0.538	3.10162e-20
Plce1	1.31936e-24	-3.28643	0.089	0.476	3.58946e-20
Ppp1r9a	1.64594e-24	-2.31507	0.105	0.513	4.47795e-20
Prkce	1.68654e-24	1.09524	0.895	0.783	4.5884e-20
Sv2c	1.71887e-24	-2.42717	0.105	0.507	4.67636e-20
Fbxl7	1.73053e-24	-3.15676	0.089	0.477	4.70809e-20
Dtx1	1.80658e-24	4.05873	0.105	0.014	4.91498e-20
Gm43305	2.09351e-24	3.84641	0.204	0.049	5.69562e-20
Sh3d19	2.92956e-24	-2.05807	0.094	0.509	7.97017e-20
Ccser2	3.16558e-24	-1.5202	0.241	0.664	8.61226e-20
Bicd1	4.20694e-24	-1.70422	0.173	0.611	1.14454e-19
Nhs	4.44401e-24	-2.87555	0.063	0.454	1.20904e-19
Sorcs1	4.5232e-24	-2.25292	0.141	0.537	1.23058e-19
Amph	5.04458e-24	-2.805	0.058	0.453	1.37243e-19
Dnm3	6.29733e-24	-1.73627	0.22	0.613	1.71325e-19
Prkd1	6.37219e-24	-2.83337	0.052	0.434	1.73362e-19
Slc12a2	6.69613e-24	-2.14242	0.12	0.532	1.82175e-19
Dip2c	6.81073e-24	-1.5082	0.257	0.674	1.85293e-19
Naaladl2	7.08234e-24	-2.6751	0.126	0.515	1.92682e-19
Cacna1c	7.14714e-24	-2.97335	0.141	0.521	1.94445e-19
Srpk3	7.4451e-24	2.90514	0.267	0.081	2.02551e-19
Rbm39	9.59118e-24	0.98501	0.869	0.795	2.60938e-19
Tmem154	1.12212e-23	4.37061	0.173	0.037	3.05283e-19
Tshz3	1.4985e-23	-3.18245	0.042	0.424	4.07683e-19
Hmgcs1	1.50689e-23	-1.84071	0.157	0.571	4.09964e-19
Gnao1	1.52468e-23	-1.95246	0.225	0.615	4.14804e-19
Rasal2	1.53193e-23	-2.01809	0.131	0.547	4.16777e-19
Upp2	1.5775e-23	-3.03745	0.058	0.436	4.29173e-19
Rbfox1	1.5923e-23	-1.9097	0.518	0.787	4.33201e-19
Ctnna1	1.68432e-23	-1.74853	0.152	0.572	4.58237e-19
Phactr1	1.74266e-23	-2.67802	0.12	0.499	4.74107e-19
Bcar3	1.89048e-23	2.79242	0.482	0.255	5.14325e-19
Cyth4	2.13263e-23	2.61927	0.178	0.038	5.80204e-19
Npas3	2.25742e-23	-2.91273	0.063	0.447	6.14155e-19
Tmem243	2.5727e-23	2.6402	0.435	0.206	6.9993e-19
Pknox2	2.8136e-23	-2.85798	0.052	0.434	7.65468e-19
Pard3	2.85288e-23	-2.43704	0.084	0.47	7.76156e-19
Tcp11l1	2.88204e-23	-2.01499	0.094	0.49	7.84089e-19
Nbea	3.09939e-23	-2.45156	0.063	0.453	8.4322e-19
Galnt18	3.16754e-23	-2.77244	0.058	0.436	8.61761e-19
Dgkh	3.40728e-23	-2.24043	0.309	0.661	9.26985e-19
Sox2ot	3.45882e-23	-3.35335	0.079	0.449	9.41007e-19
Ssbp2	3.51334e-23	-1.52756	0.225	0.644	9.5584e-19
Lama4	4.23227e-23	-2.6346	0.105	0.483	1.15143e-18
Slc38a1	4.33438e-23	2.51011	0.429	0.201	1.17921e-18
Abca8b	4.59849e-23	-3.29151	0.063	0.438	1.25107e-18
Pde7a	4.89761e-23	2.39504	0.524	0.306	1.33244e-18
Grb14	5.91331e-23	-2.94475	0.052	0.427	1.60878e-18
Ctnnal1	5.91782e-23	-2.75421	0.094	0.473	1.61e-18
Cdh19	5.92842e-23	-4.08767	0.079	0.438	1.61289e-18
Dpysl3	6.1066e-23	-1.92701	0.204	0.59	1.66136e-18
Pde7b	6.52957e-23	-3.0394	0.126	0.494	1.77643e-18
Garnl3	7.01214e-23	-2.81153	0.073	0.452	1.90772e-18
Nebl	8.60485e-23	-2.79113	0.105	0.479	2.34103e-18
Ptpn3	8.90535e-23	-2.92537	0.058	0.434	2.42279e-18
Dysf	9.03578e-23	-2.54916	0.068	0.453	2.45828e-18
Pik3c2b	9.31274e-23	3.02664	0.319	0.116	2.53362e-18
Icam1	9.73542e-23	3.87554	0.12	0.02	2.64862e-18
Pcdh7	1.02337e-22	-2.17377	0.141	0.523	2.78419e-18
Ctnna2	1.16049e-22	-3.30978	0.283	0.599	3.15722e-18
Lrp1	1.1753e-22	-3.27716	0.037	0.403	3.19752e-18
Ntrk2	1.18253e-22	-2.99243	0.084	0.453	3.21718e-18
Casp8	1.21378e-22	2.61085	0.194	0.046	3.30221e-18
St6gal1	1.40875e-22	1.52699	0.717	0.561	3.83265e-18
Cecr2	1.47831e-22	3.65877	0.34	0.133	4.0219e-18
Gramd1b	1.65479e-22	-1.76291	0.183	0.594	4.50202e-18
Slfn8	1.83135e-22	3.38964	0.141	0.027	4.98238e-18
Uaca	1.99078e-22	-2.8433	0.058	0.428	5.41612e-18
Gpc6	2.09366e-22	-2.58842	0.183	0.548	5.69602e-18
Syt1	2.17436e-22	-2.93005	0.147	0.505	5.91556e-18
Gria3	2.28802e-22	-1.9344	0.073	0.445	6.22479e-18
Cacna1a	2.37978e-22	-1.91351	0.141	0.509	6.47443e-18
Ptprs	2.47453e-22	-1.3667	0.178	0.593	6.7322e-18
Utrn	2.47814e-22	-1.28587	0.466	0.845	6.74202e-18
Cpeb1	2.59585e-22	-1.53371	0.178	0.576	7.06228e-18
Nfkb2	2.72851e-22	3.4359	0.162	0.034	7.42318e-18
Gm15411	2.82397e-22	4.18814	0.12	0.02	7.6829e-18
Sh3pxd2b	2.8894e-22	-3.89074	0.037	0.393	7.8609e-18
Clstn1	3.0378e-22	-1.80072	0.115	0.518	8.26463e-18
Cadps	3.04952e-22	-2.80572	0.178	0.519	8.29652e-18
Snx2	3.2111e-22	2.42402	0.529	0.325	8.73612e-18
Dock1	3.32309e-22	-2.68111	0.11	0.476	9.0408e-18
Epsti1	3.49572e-22	2.62862	0.194	0.047	9.51046e-18
Tcaf1	3.98396e-22	-2.14881	0.12	0.502	1.08388e-17
Epb41l3	4.04617e-22	-1.91016	0.225	0.591	1.1008e-17
Cyth1	4.0605e-22	1.88455	0.613	0.431	1.1047e-17
Nlgn1	4.87543e-22	-3.15362	0.094	0.456	1.32641e-17
Scd2	4.97401e-22	-1.35965	0.293	0.701	1.35323e-17
Galnt11	5.19474e-22	3.00083	0.455	0.241	1.41328e-17
Ankrd11	5.84911e-22	1.16137	0.78	0.714	1.59131e-17
Arhgap32	6.43627e-22	-1.85554	0.12	0.522	1.75105e-17
Ccm2	6.43962e-22	2.54453	0.487	0.274	1.75196e-17
Fign	6.69423e-22	-3.1401	0.094	0.452	1.82123e-17
9530026P05Rik	7.31924e-22	-2.66294	0.084	0.455	1.99127e-17
E2f2	8.14415e-22	3.58593	0.152	0.031	2.2157e-17
Lama2	8.81631e-22	-2.55234	0.162	0.516	2.39857e-17
Eml4	9.01008e-22	2.06928	0.571	0.38	2.45128e-17
Gpcpd1	9.51313e-22	1.58586	0.654	0.481	2.58814e-17
Psmb9	1.01314e-21	3.2461	0.183	0.044	2.75636e-17
Map3k5	1.02991e-21	2.09168	0.571	0.379	2.80198e-17
Zdhhc2	1.12594e-21	-1.73997	0.147	0.542	3.06322e-17
Slc44a1	1.32211e-21	-1.48308	0.168	0.569	3.59694e-17
Unc80	1.46604e-21	-3.15499	0.063	0.419	3.98852e-17
Cobl	1.4674e-21	-2.19337	0.073	0.444	3.99222e-17
Adam22	1.64555e-21	-2.92786	0.079	0.433	4.47689e-17
Arhgef3	1.67699e-21	2.41507	0.471	0.25	4.56241e-17
Ophn1	1.73123e-21	-2.18858	0.11	0.485	4.70998e-17
Rgs7bp	1.92691e-21	-1.69001	0.225	0.579	5.24235e-17
Iqgap1	2.10057e-21	1.52271	0.665	0.496	5.7148e-17
Magi3	2.33065e-21	-1.36241	0.199	0.588	6.34078e-17
Arhgap28	2.52976e-21	-3.33202	0.042	0.393	6.88245e-17
Nr6a1	2.96386e-21	-1.70506	0.173	0.554	8.06346e-17
Ptprm	3.03426e-21	-2.44242	0.084	0.447	8.25502e-17
Sox5	3.03521e-21	3.02784	0.497	0.288	8.2576e-17
Robo2	3.10271e-21	-2.94143	0.099	0.452	8.44123e-17
Rapgef1	3.40072e-21	2.27505	0.539	0.35	9.25201e-17
Plekha5	3.41803e-21	-2.06513	0.215	0.56	9.2991e-17
Zfyve9	3.61673e-21	-2.23872	0.084	0.453	9.83969e-17
Cdh2	4.00985e-21	-2.82174	0.068	0.426	1.09092e-16
Adam23	4.09706e-21	-2.45794	0.115	0.475	1.11465e-16
Slc24a2	4.12436e-21	-2.47493	0.12	0.481	1.12207e-16
Rapgef6	4.13233e-21	1.43479	0.675	0.534	1.12424e-16
Nrbp2	4.26159e-21	-2.1564	0.073	0.445	1.15941e-16
Deptor	4.45588e-21	-1.87407	0.136	0.515	1.21227e-16
Meg3	4.6577e-21	-2.70646	0.513	0.781	1.26717e-16
Spire1	4.86961e-21	-1.90405	0.099	0.485	1.32483e-16
Lpar1	5.44513e-21	-2.84992	0.094	0.449	1.4814e-16
Enah	5.95027e-21	-2.55797	0.089	0.45	1.61883e-16
Itga7	7.35493e-21	-3.38233	0.037	0.379	2.00098e-16
Sntb1	7.44121e-21	-3.25261	0.105	0.446	2.02445e-16
Nrxn1	7.74031e-21	-2.44491	0.262	0.594	2.10583e-16
Osbpl3	7.82479e-21	-2.5106	0.12	0.464	2.12881e-16
Ttll7	7.9112e-21	-1.65601	0.262	0.62	2.15232e-16
Cacnb4	7.96076e-21	-2.23136	0.094	0.445	2.1658e-16
Acaca	8.85342e-21	-1.36434	0.194	0.596	2.40866e-16
Kmt2e	1.0295e-20	1.17744	0.78	0.708	2.80085e-16
Laptm5	1.06034e-20	3.03407	0.157	0.034	2.88475e-16
1700025G04Rik	1.11568e-20	-2.43321	0.073	0.435	3.03533e-16
Tmeff2	1.14805e-20	-3.11624	0.052	0.399	3.12339e-16
Myt1l	1.38616e-20	-3.12933	0.068	0.411	3.77119e-16
Ddhd1	1.5526e-20	-1.70295	0.236	0.613	4.22399e-16
Mtcl1	1.56683e-20	-2.42025	0.084	0.44	4.26271e-16
Gulp1	1.62975e-20	-2.05388	0.131	0.5	4.4339e-16
Snx5	1.66078e-20	2.53703	0.403	0.192	4.51832e-16
Scn7a	1.6998e-20	-2.45481	0.099	0.455	4.62447e-16
Cxcr5	2.09595e-20	3.16433	0.293	0.106	5.70223e-16
Gpam	2.1244e-20	-3.54737	0.047	0.388	5.77963e-16
Cpeb2	2.26263e-20	-1.83049	0.11	0.484	6.15572e-16
Cttnbp2	2.31155e-20	-3.75005	0.026	0.359	6.28882e-16
Dnaaf9	2.41495e-20	-1.21199	0.246	0.642	6.57011e-16
Slc24a3	2.64229e-20	-2.62884	0.079	0.428	7.18862e-16
Erc2	2.72392e-20	-3.28129	0.099	0.432	7.41071e-16
Peli2	2.83801e-20	-2.48461	0.073	0.427	7.72108e-16
Tspan18	2.87809e-20	-3.1243	0.068	0.408	7.83012e-16
Ak5	2.94324e-20	-2.862	0.047	0.388	8.00738e-16
Elavl2	2.98008e-20	-2.29011	0.157	0.499	8.10761e-16
Zfp536	3.12697e-20	-2.67225	0.105	0.449	8.50724e-16
Arhgap42	3.20154e-20	-2.25959	0.073	0.434	8.71012e-16
Tns1	3.23918e-20	-1.52777	0.162	0.547	8.81251e-16
Sdk1	3.24043e-20	-1.82073	0.141	0.51	8.81591e-16
Smchd1	3.6449e-20	1.72261	0.613	0.457	9.91632e-16
Dock10	3.80511e-20	1.25	0.743	0.595	1.03522e-15
Gab2	3.80679e-20	-1.51584	0.141	0.522	1.03568e-15
Ppp1r1c	3.99782e-20	-2.17779	0.079	0.436	1.08765e-15
Pkia	4.11821e-20	-3.19847	0.026	0.359	1.1204e-15
Lrrk1	4.1651e-20	2.14235	0.366	0.155	1.13316e-15
Sash1	4.3063e-20	-3.0328	0.073	0.411	1.17157e-15
Klf2	4.46356e-20	2.63911	0.183	0.045	1.21436e-15
Ptprz1	4.6922e-20	-3.89082	0.052	0.382	1.27656e-15
Tjp1	5.39803e-20	-2.31443	0.094	0.454	1.46859e-15
Mpdz	5.67484e-20	-1.97701	0.105	0.469	1.5439e-15
Dipk1a	5.68151e-20	3.16758	0.309	0.119	1.54571e-15
Clec2d	5.94458e-20	2.1777	0.257	0.08	1.61728e-15
2310001H17Rik	6.22732e-20	3.75047	0.168	0.04	1.6942e-15
Dock3	6.35039e-20	-2.96431	0.052	0.388	1.72769e-15
Fgd4	6.42197e-20	-2.8507	0.052	0.393	1.74716e-15
Kcnh7	6.58002e-20	-2.93465	0.157	0.485	1.79016e-15
Prkd2	6.59908e-20	3.16644	0.262	0.088	1.79535e-15
Megf9	6.62739e-20	-1.84624	0.136	0.506	1.80305e-15
Gm26871	6.71454e-20	-3.08301	0.147	0.469	1.82676e-15
Rabgap1l	6.73565e-20	1.41708	0.723	0.594	1.8325e-15
Gpm6b	6.93952e-20	-1.43373	0.33	0.712	1.88797e-15
Thrb	7.20376e-20	-2.79055	0.047	0.387	1.95986e-15
Kif3c	7.60376e-20	-2.38038	0.063	0.411	2.06868e-15
Snhg14	7.61891e-20	-2.82332	0.068	0.408	2.0728e-15
2210408F21Rik	7.65276e-20	-2.06932	0.099	0.463	2.08201e-15
Septin8	7.82494e-20	-2.55243	0.047	0.385	2.12885e-15
Ctnnd1	7.97228e-20	-2.2307	0.063	0.413	2.16894e-15
Parva	7.97349e-20	-2.46042	0.089	0.437	2.16927e-15
Tmem123	8.75943e-20	3.50848	0.257	0.086	2.38309e-15
Gab1	8.82658e-20	-1.83455	0.11	0.479	2.40136e-15
Ank	8.8556e-20	-1.69213	0.141	0.514	2.40925e-15
Fsd1l	9.53116e-20	-3.04559	0.042	0.375	2.59305e-15
Igsf11	1.06585e-19	-3.42188	0.047	0.376	2.89976e-15
Purg	1.1058e-19	-1.92493	0.089	0.451	3.00844e-15
Trim30d	1.15099e-19	3.1639	0.183	0.047	3.13139e-15
Gm20186	1.19186e-19	3.39797	0.215	0.063	3.24258e-15
Sema6d	1.42412e-19	-2.1664	0.131	0.472	3.87445e-15
Mical2	1.48848e-19	-3.5365	0.031	0.357	4.04957e-15
Camta1	1.57217e-19	-1.40036	0.335	0.659	4.27723e-15
Gm29683	1.69889e-19	-3.77932	0.058	0.378	4.62199e-15
Tnik	1.86732e-19	-1.86516	0.157	0.518	5.08023e-15
Cacna2d1	1.91338e-19	-1.84194	0.173	0.517	5.20555e-15
Abcc5	1.9516e-19	-1.58966	0.126	0.501	5.30953e-15
Tead1	2.01695e-19	-2.19721	0.089	0.436	5.48731e-15
Cachd1	2.12665e-19	-2.87645	0.037	0.368	5.78576e-15
Rian	2.29885e-19	-2.59119	0.157	0.481	6.25425e-15
Rims1	2.48681e-19	-2.6419	0.115	0.451	6.76562e-15
Stk39	2.60158e-19	-1.85159	0.188	0.566	7.07785e-15
Cobll1	2.71108e-19	1.71656	0.497	0.265	7.37575e-15
Dock4	2.82244e-19	-2.05256	0.11	0.458	7.67873e-15
Fer	3.00026e-19	-1.94392	0.079	0.43	8.16252e-15
Grid1	3.08392e-19	-3.6568	0.058	0.378	8.3901e-15
Ghr	3.38822e-19	-2.24325	0.12	0.469	9.218e-15
Frmd3	3.4486e-19	-2.19826	0.11	0.46	9.38226e-15
Csgalnact1	3.53812e-19	-1.66707	0.099	0.454	9.6258e-15
Gria4	3.5419e-19	-2.43714	0.084	0.422	9.6361e-15
Fdft1	3.72987e-19	-1.7479	0.12	0.48	1.01475e-14
Mapre2	3.8391e-19	-1.42774	0.257	0.641	1.04446e-14
Mapk4	4.90643e-19	-4.73536	0.026	0.338	1.33484e-14
Ntrk3	4.9708e-19	-2.3212	0.147	0.485	1.35236e-14
Kctd16	5.19222e-19	-3.86659	0.11	0.424	1.41259e-14
Dlg2	5.40036e-19	-2.72688	0.115	0.457	1.46922e-14
Ptbp3	5.7183e-19	1.70428	0.581	0.403	1.55572e-14
Nf1	5.73734e-19	-1.31451	0.288	0.656	1.5609e-14
Cep85l	5.81237e-19	-1.87802	0.089	0.439	1.58131e-14
Map1b	6.16314e-19	-1.60527	0.806	0.94	1.67674e-14
Syt11	6.33024e-19	-1.31081	0.325	0.703	1.72221e-14
Tcf7l1	6.96566e-19	-3.58543	0.047	0.365	1.89508e-14
Camk2g	7.46465e-19	-1.43134	0.215	0.581	2.03083e-14
Map2	7.52713e-19	-1.96867	0.126	0.464	2.04783e-14
Dpp6	7.66265e-19	-2.79461	0.241	0.545	2.0847e-14
Col5a3	7.66426e-19	-2.77361	0.063	0.388	2.08514e-14
Adamts6	8.50436e-19	2.86342	0.283	0.105	2.3137e-14
Schip1	8.61146e-19	-2.33602	0.126	0.473	2.34283e-14
Chl1	1.00297e-18	-2.98521	0.068	0.394	2.72869e-14
Smg1	1.02126e-18	1.53618	0.639	0.513	2.77843e-14
Ext1	1.08776e-18	-1.27414	0.288	0.654	2.95935e-14
Clcf1	1.13133e-18	3.37926	0.11	0.02	3.0779e-14
Mvb12b	1.16024e-18	-1.47351	0.105	0.468	3.15656e-14
B3galt1	1.17662e-18	-2.98804	0.079	0.408	3.20111e-14
Vcl	1.34607e-18	-1.82036	0.105	0.455	3.66213e-14
Firre	1.43026e-18	-1.53103	0.099	0.448	3.89117e-14
Tmtc1	1.45764e-18	-2.06601	0.126	0.467	3.96565e-14
Gucy1a2	1.52875e-18	-3.45855	0.047	0.362	4.15912e-14
Ncald	1.53507e-18	-1.81372	0.079	0.424	4.1763e-14
Trim36	1.53538e-18	-2.50255	0.099	0.42	4.17716e-14
Mtus1	1.60575e-18	-2.50748	0.068	0.396	4.36861e-14
Pcbp3	1.62548e-18	-1.89157	0.183	0.518	4.42228e-14
Npdc1	1.64376e-18	-1.84289	0.105	0.452	4.47201e-14
Synm	1.64409e-18	-2.08	0.12	0.463	4.47292e-14
Trim9	1.76664e-18	-3.49474	0.026	0.336	4.80633e-14
Anks1b	1.77646e-18	-2.19106	0.188	0.522	4.83304e-14
Kcnip3	1.83801e-18	-2.09384	0.089	0.423	5.00049e-14
Sestd1	1.86505e-18	-2.22743	0.068	0.402	5.07405e-14
Dync1i1	1.96151e-18	-2.28854	0.105	0.436	5.33647e-14
Limch1	2.01299e-18	-2.21375	0.131	0.463	5.47653e-14
Msmo1	2.02293e-18	-1.82952	0.089	0.436	5.50357e-14
Rgs7	2.03608e-18	-2.73813	0.084	0.411	5.53935e-14
Zfp532	2.10871e-18	-2.63463	0.058	0.381	5.73696e-14
Coro1a	2.16378e-18	2.36148	0.461	0.26	5.88678e-14
Kif13a	2.20562e-18	-1.78366	0.11	0.466	6.0006e-14
Map4	2.31294e-18	-0.98486	0.424	0.773	6.29259e-14
Akap6	2.334e-18	-1.53868	0.194	0.509	6.34987e-14
1500004A13Rik	2.39855e-18	-2.55623	0.042	0.362	6.52548e-14
Arhgef10l	2.41772e-18	-2.36108	0.063	0.391	6.57764e-14
Mapk10	2.51109e-18	-2.22582	0.131	0.461	6.83166e-14
Pirb	2.58257e-18	2.73385	0.157	0.037	7.02615e-14
Phf24	2.60103e-18	-1.97679	0.204	0.541	7.07637e-14
Timp3	2.61074e-18	-1.81258	0.157	0.502	7.10277e-14
Kcnma1	2.7167e-18	-2.79279	0.094	0.414	7.39105e-14
Tcf7l2	3.04639e-18	-2.48553	0.079	0.403	8.288e-14
Stk4	3.13901e-18	2.61571	0.45	0.263	8.53999e-14
Atrx	3.18285e-18	1.10063	0.743	0.662	8.65926e-14
Hdac4	3.25338e-18	-1.82872	0.105	0.448	8.85115e-14
Ocrl	3.29203e-18	-1.93149	0.052	0.376	8.9563e-14
Cask	3.40217e-18	-1.57646	0.099	0.452	9.25593e-14
Pik3cd	3.52079e-18	2.45023	0.424	0.228	9.57867e-14
Tanc1	3.53246e-18	-1.63796	0.084	0.428	9.61042e-14
Peg3	3.55252e-18	-1.96424	0.11	0.451	9.66498e-14
Kif5a	3.55261e-18	-1.69588	0.23	0.568	9.66524e-14
Lmbr1	3.65106e-18	-2.50592	0.037	0.352	9.93308e-14
Syn2	3.66294e-18	-3.0683	0.052	0.363	9.9654e-14
Oxr1	3.80052e-18	-1.33522	0.288	0.633	1.03397e-13
Tsc22d1	3.80475e-18	-1.62468	0.12	0.473	1.03512e-13
Pcsk5	3.89796e-18	-3.2519	0.047	0.358	1.06048e-13
Matn2	3.94924e-18	-2.73322	0.084	0.406	1.07443e-13
Mafg	4.15227e-18	-1.48944	0.126	0.486	1.12967e-13
Frmd4b	4.35141e-18	-2.74811	0.073	0.393	1.18384e-13
Hacd3	4.37414e-18	-2.30411	0.068	0.395	1.19003e-13
Zfhx4	4.38998e-18	-2.7382	0.068	0.387	1.19434e-13
Scn10a	4.50237e-18	-2.6695	0.12	0.436	1.22491e-13
Cttnbp2nl	4.8359e-18	-3.09259	0.031	0.34	1.31566e-13
Adcy2	5.00111e-18	-3.01938	0.052	0.365	1.3606e-13
N4bp2	5.39249e-18	2.84593	0.288	0.111	1.46708e-13
Miat	5.62682e-18	-2.7325	0.073	0.388	1.53083e-13
Lix1	5.66252e-18	-1.54027	0.162	0.518	1.54054e-13
Fam171a1	5.85379e-18	-2.82121	0.052	0.366	1.59258e-13
Pcbp4	5.8972e-18	-1.67472	0.105	0.452	1.60439e-13
Fstl1	6.56543e-18	-1.32195	0.461	0.78	1.78619e-13
Map3k1	7.00889e-18	2.12947	0.508	0.327	1.90684e-13
Lrfn5	7.05706e-18	-3.26459	0.063	0.372	1.91994e-13
Igsf3	7.12686e-18	-1.79249	0.094	0.431	1.93893e-13
Tspan7	7.12781e-18	-2.04123	0.089	0.423	1.93919e-13
Erc1	7.29138e-18	-1.36962	0.147	0.508	1.98369e-13
A330076H08Rik	7.59197e-18	-3.64034	0.026	0.328	2.06547e-13
Gabbr2	8.11448e-18	-2.36238	0.089	0.412	2.20763e-13
Myo18a	8.65458e-18	-1.48393	0.188	0.554	2.35456e-13
Ccdc85a	8.99954e-18	-3.05626	0.052	0.359	2.44842e-13
Prph	1.01795e-17	-1.57851	0.288	0.62	2.76942e-13
Ptpn12	1.03463e-17	-1.57416	0.11	0.457	2.81482e-13
Maged1	1.12275e-17	-1.87817	0.089	0.423	3.05455e-13
Kctd8	1.12649e-17	-3.14979	0.084	0.388	3.06472e-13
Grm7	1.16365e-17	-3.39714	0.12	0.43	3.16582e-13
Gm5914	1.16837e-17	2.99799	0.325	0.143	3.17867e-13
Fgf12	1.2459e-17	-2.50389	0.236	0.548	3.38958e-13
Kank1	1.26626e-17	-2.45648	0.099	0.42	3.445e-13
Eml1	1.35523e-17	-1.8388	0.152	0.483	3.68703e-13
Aspa	1.46396e-17	-3.38631	0.063	0.362	3.98284e-13
Plscr4	1.52802e-17	-3.59542	0.037	0.334	4.15713e-13
Prkar1b	1.56043e-17	-1.80297	0.089	0.418	4.2453e-13
Fam189b	1.57302e-17	-1.99446	0.115	0.441	4.27957e-13
Ralyl	1.59435e-17	-3.14071	0.141	0.446	4.3376e-13
Rgmb	1.65962e-17	-1.55329	0.126	0.466	4.51517e-13
Rbm47	1.67755e-17	2.60788	0.246	0.084	4.56393e-13
Ksr1	1.71874e-17	-2.35957	0.068	0.387	4.676e-13
Hmcn1	1.81777e-17	-3.09004	0.063	0.366	4.94541e-13
Lamp2	1.85769e-17	-1.39482	0.11	0.463	5.05402e-13
Rab3c	1.94186e-17	-2.60883	0.079	0.389	5.28303e-13
Ppfia2	2.08601e-17	-2.60522	0.058	0.366	5.6752e-13
Ctdspl	2.22843e-17	-2.75743	0.052	0.357	6.06267e-13
Btg2	2.23275e-17	3.22876	0.199	0.06	6.07441e-13
Fmn1	2.50669e-17	-1.7215	0.152	0.462	6.81969e-13
Kcna2	2.57118e-17	-1.78538	0.141	0.485	6.99516e-13
Cdh6	2.6269e-17	-4.90688	0.021	0.309	7.14674e-13
Stard9	2.62979e-17	-2.26426	0.063	0.38	7.15461e-13
Arhgap31	2.76745e-17	-1.91415	0.141	0.475	7.52914e-13
Hecw1	2.96306e-17	-2.51915	0.12	0.427	8.0613e-13
Tafa5	3.16246e-17	-3.02251	0.042	0.343	8.6038e-13
Srcin1	3.36327e-17	-3.21467	0.026	0.32	9.1501e-13
Gm17167	3.40653e-17	-2.36247	0.084	0.401	9.26782e-13
Fam172a	3.60233e-17	1.25514	0.712	0.587	9.80049e-13
Mapk8ip1	3.72079e-17	-1.84144	0.089	0.411	1.01228e-12
Nacc2	3.75526e-17	-1.59902	0.168	0.514	1.02166e-12
Cyth3	4.00072e-17	-1.7991	0.068	0.388	1.08844e-12
Ldlr	4.08686e-17	-1.6096	0.105	0.442	1.11187e-12
Mcl1	4.20735e-17	2.57393	0.366	0.178	1.14465e-12
Grik3	4.49785e-17	-1.55907	0.157	0.5	1.22368e-12
Kif3a	4.61472e-17	-1.57609	0.099	0.435	1.25548e-12
Afap1l2	4.68908e-17	-3.94439	0.037	0.324	1.27571e-12
Azin2	4.85286e-17	-5.71783	0.005	0.284	1.32027e-12
Cacna1b	5.23592e-17	-2.36548	0.068	0.372	1.42448e-12
Daam2	5.52768e-17	-3.24066	0.063	0.357	1.50386e-12
Gm4316	5.81032e-17	4.06992	0.173	0.048	1.58075e-12
Tacc2	6.172e-17	-1.65373	0.105	0.44	1.67915e-12
Plekha6	6.17698e-17	-2.05987	0.105	0.423	1.68051e-12
Kcna6	6.28682e-17	-2.46686	0.063	0.37	1.71039e-12
Myo10	6.35962e-17	-2.31051	0.084	0.396	1.7302e-12
Prex2	7.06984e-17	-2.41274	0.099	0.408	1.92342e-12
Lrrc49	7.37569e-17	-1.87089	0.079	0.395	2.00663e-12
Add2	7.37585e-17	-2.10755	0.084	0.399	2.00667e-12
Pmepa1	7.66013e-17	-2.21244	0.141	0.454	2.08402e-12
Btbd3	8.04495e-17	-1.83858	0.089	0.412	2.18871e-12
Nuak2	9.03274e-17	3.26632	0.11	0.022	2.45745e-12
Hcn1	9.24793e-17	-1.76399	0.178	0.491	2.51599e-12
Cntn1	9.28498e-17	-1.94829	0.141	0.466	2.52607e-12
Myb	1.02867e-16	4.82708	0.105	0.02	2.79861e-12
Itsn1	1.0774e-16	-1.53912	0.115	0.45	2.93117e-12
Cpeb3	1.1439e-16	-0.543569	0.131	0.465	3.11209e-12
Unc79	1.16415e-16	-3.19983	0.037	0.326	3.16718e-12
Cntfr	1.16624e-16	-2.47059	0.042	0.34	3.17286e-12
4732471J01Rik	1.18795e-16	-2.10087	0.068	0.377	3.23193e-12
Csf2rb	1.21838e-16	3.17132	0.115	0.023	3.31472e-12
Nrg1	1.22033e-16	-2.73303	0.141	0.451	3.32003e-12
Epb41l4b	1.23991e-16	-2.26893	0.084	0.395	3.37331e-12
Sparcl1	1.2406e-16	-1.79298	0.084	0.403	3.37517e-12
Nrxn3	1.27145e-16	-2.07453	0.194	0.493	3.45911e-12
Avil	1.30744e-16	-1.78308	0.141	0.469	3.55701e-12
Stxbp1	1.32605e-16	-1.45883	0.162	0.508	3.60765e-12
Gramd3	1.33299e-16	2.409	0.267	0.1	3.62653e-12
Samd12	1.33302e-16	-3.00358	0.063	0.358	3.62662e-12
Cdr1os	1.39538e-16	-2.12958	0.084	0.389	3.79627e-12
Cttn	1.51099e-16	-2.59886	0.042	0.338	4.11079e-12
Elovl6	1.53156e-16	-1.23538	0.141	0.485	4.16676e-12
Pip4k2a	1.56321e-16	1.7879	0.545	0.383	4.25287e-12
Nrcam	1.6258e-16	-2.42782	0.079	0.383	4.42316e-12
Map1a	1.62893e-16	-1.73057	0.33	0.653	4.43168e-12
Snx10	1.6393e-16	-1.38102	0.12	0.456	4.45987e-12
Rusc2	1.65018e-16	-2.59918	0.047	0.345	4.48949e-12
Pde4dip	1.70306e-16	-1.89582	0.141	0.461	4.63334e-12
Wasf2	1.76556e-16	1.74475	0.565	0.417	4.80339e-12
Fdps	1.83037e-16	-1.5094	0.11	0.437	4.97971e-12
Cdh1	1.85985e-16	-2.02594	0.094	0.407	5.0599e-12
Kcnh8	1.89228e-16	-3.88927	0.042	0.325	5.14814e-12
Dnm1	1.97947e-16	-1.86182	0.089	0.41	5.38535e-12
Luzp1	1.99645e-16	-1.56175	0.094	0.417	5.43155e-12
Lck	2.01429e-16	3.24932	0.105	0.02	5.48007e-12
Mib1	2.03302e-16	-1.06784	0.115	0.466	5.53104e-12
Lhfp	2.03859e-16	-2.40363	0.11	0.416	5.54617e-12
Rtn1	2.09697e-16	-1.05821	0.356	0.686	5.70502e-12
Elavl4	2.13762e-16	-1.62218	0.267	0.548	5.8156e-12
Tmem178b	2.17397e-16	-2.31684	0.094	0.4	5.91451e-12
Eno2	2.18805e-16	-2.14449	0.079	0.39	5.9528e-12
Coro2b	2.2012e-16	-1.59022	0.084	0.403	5.98857e-12
Nap1l5	2.29348e-16	-2.54879	0.047	0.343	6.23964e-12
Zcchc7	2.50707e-16	1.07466	0.754	0.665	6.82073e-12
Caskin1	2.52456e-16	-2.49207	0.031	0.319	6.86833e-12
Nmnat2	2.57871e-16	-1.61727	0.079	0.39	7.01563e-12
Zfp521	2.63868e-16	-3.0618	0.063	0.354	7.17878e-12
Tmem117	2.70473e-16	-2.26126	0.073	0.379	7.35848e-12
Crmp1	2.83352e-16	-2.95183	0.042	0.327	7.70888e-12
Nrg3	2.94712e-16	-2.87706	0.22	0.5	8.01793e-12
Scn9a	2.98757e-16	-1.79904	0.246	0.531	8.12798e-12
Itgb8	3.015e-16	-2.83593	0.068	0.363	8.20261e-12
Dpysl5	3.18767e-16	-2.56455	0.042	0.332	8.67238e-12
5330434G04Rik	3.19359e-16	-2.06874	0.058	0.357	8.68848e-12
Smim14	3.23211e-16	1.58862	0.602	0.481	8.79328e-12
Sobp	3.27008e-16	-2.01794	0.073	0.376	8.89657e-12
Csrnp3	3.61907e-16	-2.10969	0.058	0.359	9.84603e-12
Ptk2	3.77984e-16	-1.26808	0.178	0.527	1.02834e-11
Zfpm2	3.79574e-16	-2.95458	0.058	0.347	1.03267e-11
Grik4	3.86144e-16	-2.70224	0.079	0.371	1.05054e-11
Spats2l	3.93728e-16	-4.31629	0.016	0.287	1.07118e-11
Irf5	4.13272e-16	3.43977	0.162	0.044	1.12435e-11
Hoxc6	4.1528e-16	-2.6855	0.042	0.329	1.12981e-11
Hmgcr	4.17011e-16	-1.71587	0.099	0.414	1.13452e-11
Ndrg2	4.26071e-16	-3.14156	0.047	0.33	1.15917e-11
Tec	4.4535e-16	1.83111	0.424	0.224	1.21162e-11
Cdk14	4.53115e-16	-0.920893	0.236	0.598	1.23275e-11
Sybu	4.63918e-16	-2.69353	0.031	0.316	1.26214e-11
Elavl3	4.78013e-16	-1.47889	0.136	0.452	1.30048e-11
Fzd3	4.78526e-16	-2.96053	0.021	0.3	1.30188e-11
Cd9	4.82798e-16	-1.30981	0.241	0.583	1.3135e-11
Fmn2	4.89985e-16	-1.82259	0.089	0.402	1.33305e-11
Med12l	4.90975e-16	-2.60592	0.052	0.346	1.33575e-11
Atp8a2	5.31557e-16	-2.2512	0.12	0.427	1.44615e-11
Stmn2	5.36986e-16	-1.23456	0.382	0.687	1.46092e-11
Pls3	5.37769e-16	-1.95254	0.052	0.349	1.46305e-11
Pcsk2	5.4598e-16	-1.8902	0.157	0.466	1.48539e-11
Kifap3	5.76401e-16	-1.20396	0.22	0.579	1.56816e-11
Flywch1	5.97518e-16	-1.46742	0.12	0.446	1.62561e-11
Themis2	6.50564e-16	3.09805	0.141	0.035	1.76992e-11
Rb1	7.13075e-16	1.47395	0.623	0.479	1.93999e-11
Rph3a	7.21592e-16	-2.00065	0.079	0.386	1.96316e-11
Glcci1	7.42637e-16	2.34673	0.487	0.324	2.02042e-11
Myo6	7.58352e-16	-1.61543	0.079	0.386	2.06317e-11
Nos1ap	7.72008e-16	-2.43921	0.052	0.344	2.10032e-11
Reep1	8.27026e-16	-1.63097	0.136	0.452	2.25001e-11
Per3	8.8493e-16	-1.84209	0.105	0.416	2.40754e-11
Gm20707	8.88097e-16	3.71352	0.136	0.033	2.41616e-11
Col28a1	9.20327e-16	-3.25378	0.047	0.324	2.50384e-11
Slc9a9	9.24412e-16	-1.61006	0.309	0.596	2.51496e-11
Fam135a	9.37238e-16	-2.14275	0.068	0.362	2.54985e-11
Snap91	9.76402e-16	-2.15315	0.089	0.386	2.6564e-11
Cntnap2	9.82953e-16	-2.66538	0.408	0.644	2.67422e-11
Sulf1	1.0083e-15	-3.14972	0.052	0.332	2.74319e-11
Ccser1	1.07109e-15	-2.7702	0.084	0.368	2.914e-11
Adgrg6	1.07202e-15	-3.73035	0.031	0.302	2.91654e-11
Frmpd1	1.07228e-15	-3.05052	0.031	0.31	2.91723e-11
Gtf2ird1	1.08567e-15	-2.83189	0.037	0.315	2.95367e-11
Abi2	1.09494e-15	-1.70062	0.058	0.354	2.9789e-11
Ccdc136	1.14539e-15	-2.18079	0.037	0.318	3.11616e-11
2900026A02Rik	1.14627e-15	-2.83214	0.021	0.295	3.11855e-11
Vegfa	1.15255e-15	-3.22432	0.016	0.285	3.13562e-11
Hdac9	1.22073e-15	1.42549	0.618	0.411	3.32111e-11
L1cam	1.25058e-15	-1.51227	0.11	0.427	3.40232e-11
Vwa5a	1.25824e-15	-1.91053	0.089	0.393	3.42316e-11
Nsdhl	1.34214e-15	-1.93087	0.079	0.381	3.65143e-11
Shtn1	1.41017e-15	-1.57866	0.126	0.445	3.83652e-11
Chn1	1.41461e-15	-2.73034	0.047	0.329	3.8486e-11
Srrm3	1.49954e-15	-2.9408	0.037	0.312	4.07964e-11
Tcf4	1.53297e-15	1.33869	0.654	0.519	4.17059e-11
St3gal4	1.54315e-15	-1.95838	0.162	0.465	4.19829e-11
Sv2b	1.56762e-15	-2.92454	0.042	0.318	4.26486e-11
Ttbk2	1.60277e-15	-1.45982	0.152	0.481	4.3605e-11
Rnf217	1.62911e-15	-3.50629	0.016	0.281	4.43215e-11
Pacs2	1.67427e-15	-1.48943	0.105	0.42	4.55502e-11
Kalrn	1.81346e-15	-1.67464	0.162	0.484	4.93369e-11
Epb41l1	1.84179e-15	-2.28051	0.068	0.357	5.01078e-11
Acvr1	1.84772e-15	-2.35565	0.031	0.311	5.02691e-11
Cend1	1.85121e-15	-2.23055	0.052	0.341	5.03641e-11
Rin3	2.02116e-15	1.85259	0.351	0.165	5.49878e-11
Cracd	2.03125e-15	-1.84933	0.099	0.406	5.52623e-11
Cpt1c	2.12499e-15	-4.41556	0.005	0.263	5.78126e-11
Cntnap5a	2.19241e-15	-3.64267	0.026	0.294	5.96468e-11
Sgip1	2.20134e-15	-2.54166	0.073	0.359	5.98897e-11
Btg1	2.22298e-15	2.52772	0.387	0.21	6.04784e-11
Gmip	2.24293e-15	2.86356	0.293	0.128	6.10211e-11
Xkr4	2.25321e-15	-2.46572	0.094	0.386	6.13007e-11
Daam1	2.27461e-15	-1.63825	0.115	0.428	6.18832e-11
Elapor2	2.29056e-15	-3.84962	0.021	0.284	6.23168e-11
Fads2	2.3147e-15	-1.61099	0.099	0.412	6.29738e-11
Ano3	2.32605e-15	-2.35882	0.126	0.429	6.32825e-11
Apc2	2.42167e-15	-2.49303	0.042	0.321	6.5884e-11
Ldb2	2.46494e-15	-2.57775	0.12	0.403	6.70612e-11
Samd4	2.49054e-15	-2.1127	0.094	0.39	6.77575e-11
Anxa2	2.50025e-15	-1.09483	0.314	0.667	6.80219e-11
Opcml	2.58023e-15	-2.78747	0.131	0.419	7.01976e-11
Tbc1d5	2.64473e-15	1.62172	0.613	0.52	7.19526e-11
Btbd9	2.72577e-15	1.12162	0.665	0.564	7.41573e-11
Mamld1	2.76754e-15	-2.52427	0.021	0.287	7.52936e-11
Osbpl1a	2.77054e-15	-1.44395	0.099	0.415	7.53752e-11
Pirt	3.13414e-15	-1.60304	0.136	0.446	8.52673e-11
Arhgef25	3.15877e-15	-1.73241	0.047	0.334	8.59376e-11
Slc7a2	3.17393e-15	-3.09798	0.042	0.314	8.635e-11
Cpe	3.26012e-15	-1.46143	0.188	0.506	8.86947e-11
Apba1	3.2935e-15	-1.49677	0.209	0.52	8.9603e-11
Spock2	3.30577e-15	-1.49357	0.272	0.573	8.99367e-11
Rab6a	3.31521e-15	-1.20608	0.257	0.604	9.01935e-11
Ppp1r14c	3.3983e-15	-2.99704	0.052	0.325	9.24541e-11
Vezt	3.6944e-15	-1.37625	0.147	0.463	1.0051e-10
Pde10a	3.76326e-15	-3.1917	0.037	0.307	1.02383e-10
Selplg	3.90633e-15	3.27519	0.131	0.032	1.06276e-10
Dok4	3.95158e-15	-1.92709	0.073	0.364	1.07507e-10
Grip1	3.97506e-15	-2.21361	0.173	0.449	1.08145e-10
Acss2	4.02102e-15	-1.96139	0.084	0.381	1.09396e-10
Mapk3	4.05728e-15	-1.54084	0.178	0.499	1.10382e-10
Mgat3	4.06039e-15	-1.4784	0.089	0.399	1.10467e-10
Atf6	4.06203e-15	2.0577	0.497	0.35	1.10512e-10
Cnksr2	4.19686e-15	-2.21643	0.068	0.355	1.1418e-10
Clk1	4.26032e-15	1.15948	0.665	0.561	1.15906e-10
Kif26b	4.26166e-15	-3.94158	0.021	0.282	1.15943e-10
Garem1	4.41256e-15	-2.61382	0.052	0.33	1.20048e-10
Neo1	4.62207e-15	-3.34865	0.026	0.291	1.25748e-10
Phldb2	4.81311e-15	-2.668	0.031	0.303	1.30946e-10
Smap2	4.83982e-15	2.42204	0.45	0.292	1.31672e-10
Zbtb16	4.8607e-15	-3.96346	0.037	0.299	1.3224e-10
Cntn2	4.95162e-15	-2.12244	0.042	0.321	1.34714e-10
Ndrg1	5.0076e-15	-1.60964	0.162	0.475	1.36237e-10
Klf9	5.04716e-15	-1.16527	0.157	0.494	1.37313e-10
Tmod1	5.05732e-15	-2.70784	0.058	0.332	1.37589e-10
Kif5c	5.17724e-15	-1.41613	0.209	0.528	1.40852e-10
Calm3	5.17966e-15	-1.6492	0.162	0.477	1.40918e-10
D130009I18Rik	5.92759e-15	-3.02044	0.141	0.417	1.61266e-10
Snrpn	6.14907e-15	-1.3685	0.194	0.518	1.67292e-10
Cpne8	6.40581e-15	-1.57522	0.089	0.39	1.74276e-10
Map6	6.4487e-15	-1.4322	0.131	0.446	1.75443e-10
Gkap1	6.47704e-15	-0.965483	0.073	0.371	1.76214e-10
Eva1c	6.60918e-15	-3.51193	0.037	0.3	1.79809e-10
Ccdc141	6.7355e-15	-2.57965	0.052	0.327	1.83246e-10
Antxr1	6.75415e-15	-2.79835	0.052	0.325	1.83754e-10
Rbm25	6.78869e-15	0.897514	0.801	0.773	1.84693e-10
Ank1	7.26087e-15	-2.06682	0.073	0.357	1.97539e-10
Scg3	7.39606e-15	-1.45284	0.204	0.525	2.01217e-10
Zc3h12a	7.5451e-15	3.0587	0.131	0.032	2.05272e-10
Xkr6	7.55301e-15	-2.53265	0.052	0.328	2.05487e-10
Ppfibp1	7.69905e-15	-2.0067	0.073	0.36	2.0946e-10
Nckap5	7.70329e-15	-3.85445	0.037	0.297	2.09576e-10
Plxna2	8.08218e-15	-1.85418	0.094	0.388	2.19884e-10
Hk1	8.08282e-15	-1.34111	0.11	0.425	2.19901e-10
Gm12394	8.19667e-15	-2.54195	0.047	0.32	2.22999e-10
Arid1b	8.53779e-15	1.36572	0.686	0.617	2.32279e-10
Dip2a	8.6671e-15	-3.62386	0.01	0.264	2.35797e-10
Tmem63b	8.83642e-15	-1.07185	0.11	0.429	2.40404e-10
Zfp36l1	8.85873e-15	2.10835	0.335	0.155	2.41011e-10
Tubb3	9.15951e-15	-1.32754	0.34	0.653	2.49194e-10
Ndrg4	9.34477e-15	-1.25703	0.304	0.621	2.54234e-10
Rab6b	9.53704e-15	-1.21998	0.298	0.61	2.59465e-10
1110051M20Rik	9.76112e-15	-0.977932	0.162	0.505	2.65561e-10
Carmil3	9.78972e-15	-4.72045	0.016	0.266	2.66339e-10
Ppp2r5a	1.01615e-14	2.13901	0.325	0.152	2.76454e-10
Arhgef28	1.0169e-14	-2.32045	0.063	0.34	2.76657e-10
Ppm1h	1.03137e-14	-1.48548	0.141	0.46	2.80595e-10
Zwint	1.05631e-14	-1.29855	0.173	0.497	2.87379e-10
Iqsec2	1.06058e-14	-1.80019	0.052	0.332	2.88541e-10
Cpeb4	1.06248e-14	-0.938876	0.12	0.445	2.89058e-10
Fam171b	1.06269e-14	-1.79389	0.073	0.361	2.89116e-10
Arhgap44	1.12001e-14	-2.65621	0.037	0.304	3.04709e-10
Galnt13	1.21146e-14	-2.47423	0.094	0.369	3.2959e-10
Sik1	1.21371e-14	3.51524	0.162	0.047	3.30202e-10
Epdr1	1.23572e-14	-1.39468	0.089	0.386	3.3619e-10
Ccdc92	1.29178e-14	-1.55688	0.089	0.389	3.51442e-10
Appl2	1.30859e-14	-2.15909	0.052	0.327	3.56016e-10
Frmd6	1.33848e-14	-2.84111	0.084	0.35	3.64147e-10
Tap1	1.35713e-14	2.80655	0.204	0.07	3.69221e-10
Lhfpl3	1.44443e-14	-1.16974	0.11	0.398	3.92973e-10
Slc22a17	1.45109e-14	-2.67558	0.037	0.301	3.94785e-10
Pou4f1	1.52986e-14	-1.6743	0.073	0.361	4.16213e-10
Slc25a27	1.56677e-14	-1.49913	0.084	0.372	4.26257e-10
Usp13	1.56769e-14	-2.31674	0.063	0.336	4.26505e-10
Ust	1.5874e-14	-1.83212	0.12	0.412	4.31868e-10
Map4k2	1.61554e-14	2.23146	0.414	0.243	4.39524e-10
2610307P16Rik	1.62925e-14	-1.44934	0.12	0.413	4.43254e-10
Sf3b1	1.63102e-14	1.20107	0.66	0.577	4.43735e-10
Kazn	1.72652e-14	-2.19308	0.079	0.355	4.69718e-10
Ywhag	1.78296e-14	-1.32583	0.335	0.653	4.85073e-10
Cald1	1.79915e-14	-2.85263	0.063	0.329	4.89476e-10
Zfyve28	1.81969e-14	-1.9059	0.084	0.366	4.95064e-10
D130043K22Rik	1.83892e-14	-3.22656	0.031	0.289	5.00295e-10
Colgalt2	1.84674e-14	-3.69663	0.021	0.271	5.02423e-10
Sntb2	1.85052e-14	-1.34775	0.136	0.446	5.03451e-10
Ctbp2	1.86212e-14	-3.52613	0.026	0.28	5.0661e-10
Raph1	1.86534e-14	-1.21417	0.131	0.437	5.07484e-10
Evi5l	1.94103e-14	-2.30677	0.042	0.31	5.28075e-10
Gdap1	1.99761e-14	-2.05284	0.042	0.312	5.43471e-10
Shroom3	2.01771e-14	-1.78413	0.047	0.32	5.48939e-10
Dpysl2	2.08675e-14	-1.133	0.314	0.632	5.67721e-10
Nedd4	2.09703e-14	-0.752935	0.398	0.727	5.70518e-10
Mid2	2.20939e-14	-2.3007	0.042	0.308	6.01086e-10
Prrxl1	2.26229e-14	-2.83201	0.031	0.29	6.15478e-10
Lingo2	2.27092e-14	-3.28925	0.141	0.416	6.17827e-10
Etl4	2.32489e-14	-2.14264	0.157	0.451	6.3251e-10
2210408I21Rik	2.32845e-14	-1.5842	0.099	0.397	6.33479e-10
Thsd4	2.34048e-14	-3.24907	0.031	0.289	6.36751e-10
Dgki	2.44789e-14	-3.22439	0.136	0.411	6.65974e-10
Tom1l2	2.51802e-14	-0.750519	0.304	0.68	6.85052e-10
Hs6st3	2.57979e-14	-3.68239	0.052	0.312	7.01857e-10
Gabrb3	2.62297e-14	-2.67383	0.052	0.316	7.13605e-10
Dok6	2.62724e-14	-2.38675	0.079	0.351	7.14767e-10
Syn1	2.63383e-14	-1.73308	0.11	0.401	7.16559e-10
Mfap3l	2.73437e-14	-2.49588	0.047	0.312	7.43913e-10
Ikzf2	2.74769e-14	-3.80979	0.021	0.27	7.47536e-10
Aacs	2.87809e-14	-1.98854	0.047	0.319	7.83014e-10
Rasgef1a	2.92811e-14	-2.21845	0.042	0.307	7.96621e-10
9330111N05Rik	2.94771e-14	-1.14411	0.199	0.528	8.01954e-10
Sox6	3.00676e-14	-2.22049	0.105	0.381	8.18019e-10
Rbfox3	3.1114e-14	-1.54817	0.152	0.446	8.46488e-10
Galnt14	3.12778e-14	-3.49987	0.031	0.283	8.50944e-10
Grik5	3.14311e-14	-2.25355	0.042	0.307	8.55115e-10
Abr	3.22156e-14	-1.11793	0.141	0.458	8.76458e-10
Spock1	3.23673e-14	-2.43058	0.079	0.353	8.80585e-10
Nwd2	3.28752e-14	-2.54344	0.047	0.31	8.94402e-10
Notch2	3.3757e-14	1.99578	0.424	0.242	9.18393e-10
Snx29	3.41683e-14	1.42431	0.639	0.513	9.29583e-10
Pcyt2	3.41837e-14	-1.61386	0.068	0.35	9.30001e-10
Bmpr1a	3.4928e-14	-1.28517	0.12	0.424	9.5025e-10
Armh4	3.65953e-14	-1.83605	0.052	0.327	9.95613e-10
Tafa1	3.71348e-14	-3.16445	0.084	0.352	1.01029e-09
Nup210	3.7406e-14	3.33532	0.225	0.085	1.01767e-09
Smarca1	3.86947e-14	-6.53031	0	0.235	1.05273e-09
Fbln2	3.96954e-14	-3.96287	0.031	0.279	1.07995e-09
Cplane1	3.99796e-14	-1.41472	0.147	0.453	1.08769e-09
Kcnb1	4.07869e-14	-1.75115	0.099	0.386	1.10965e-09
Sgpp2	4.12494e-14	-2.61203	0.042	0.302	1.12223e-09
Sptan1	4.16474e-14	-0.809339	0.361	0.698	1.13306e-09
Prdm16	4.36831e-14	-1.2815	0.272	0.583	1.18844e-09
Trarg1	4.38349e-14	-1.81637	0.131	0.42	1.19257e-09
Pip4p2	4.38988e-14	-1.73633	0.042	0.305	1.19431e-09
Chka	4.3904e-14	-1.1681	0.147	0.458	1.19445e-09
Plekha4	4.53053e-14	-1.69935	0.12	0.408	1.23258e-09
Pcyt1b	4.63953e-14	-2.06898	0.042	0.306	1.26223e-09
Lmo2	4.89597e-14	2.50259	0.178	0.056	1.332e-09
Plec	4.93115e-14	-1.10619	0.23	0.549	1.34157e-09
Hmgcll1	5.15499e-14	-2.42128	0.026	0.28	1.40247e-09
Asic2	5.22363e-14	-2.89113	0.188	0.46	1.42114e-09
Tbc1d19	5.22785e-14	-2.05138	0.063	0.335	1.42229e-09
Pkm	5.44111e-14	-1.18053	0.22	0.555	1.48031e-09
Ttc28	5.51404e-14	-1.19625	0.188	0.506	1.50015e-09
Fbxl2	5.58606e-14	-1.88857	0.052	0.317	1.51974e-09
Plxna4	5.79461e-14	-2.387	0.089	0.356	1.57648e-09
Napb	5.8648e-14	-1.24978	0.168	0.474	1.59558e-09
Fnip2	6.45155e-14	-2.7174	0.037	0.293	1.75521e-09
Brsk2	6.53772e-14	-2.3999	0.031	0.285	1.77865e-09
Abcd3	6.56029e-14	-1.60187	0.094	0.38	1.78479e-09
Rin2	6.70103e-14	-1.83549	0.047	0.313	1.82308e-09
Asph	6.91472e-14	-1.24871	0.115	0.418	1.88122e-09
Unc13c	6.99948e-14	-3.57805	0.031	0.28	1.90428e-09
Efr3b	7.03898e-14	-1.87613	0.047	0.309	1.91503e-09
Snx8	7.21665e-14	2.66751	0.34	0.178	1.96336e-09
Adgrl1	7.33177e-14	-1.62812	0.058	0.329	1.99468e-09
Arhgef40	7.35521e-14	-2.46014	0.058	0.319	2.00106e-09
Kidins220	7.61775e-14	-0.978694	0.277	0.596	2.07249e-09
Cltb	7.69901e-14	-1.26704	0.099	0.393	2.09459e-09
Dnajb14	7.89764e-14	-1.74462	0.073	0.345	2.14863e-09
Acsbg1	7.89852e-14	-4.18951	0.031	0.273	2.14887e-09
Ptch1	8.02485e-14	-1.9097	0.11	0.396	2.18324e-09
Atp2b2	8.0885e-14	-2.34716	0.047	0.307	2.20056e-09
Pxdn	8.26388e-14	-3.87001	0.026	0.269	2.24827e-09
Nfic	8.32815e-14	-1.2189	0.188	0.513	2.26576e-09
Gm49678	8.77958e-14	-3.13881	0.058	0.311	2.38857e-09
Camsap2	8.92958e-14	-1.11687	0.115	0.421	2.42938e-09
Nbeal1	8.95144e-14	-0.934357	0.236	0.58	2.43533e-09
Flot2	8.95481e-14	-1.22927	0.11	0.413	2.43625e-09
Pakap	8.95687e-14	-2.77943	0.037	0.289	2.4368e-09
Sfxn5	8.98395e-14	-2.20824	0.047	0.309	2.44417e-09
Lrsam1	9.30063e-14	-1.93281	0.063	0.327	2.53033e-09
Tox	9.3252e-14	-2.41592	0.079	0.343	2.53701e-09
Nr2f2	9.60643e-14	-1.91706	0.115	0.391	2.61353e-09
Bicc1	9.63154e-14	-1.83496	0.037	0.294	2.62036e-09
Syne2	9.92937e-14	-1.26082	0.157	0.456	2.70138e-09
Gpt2	9.95932e-14	-2.31512	0.026	0.275	2.70953e-09
Acly	1.01383e-13	-1.08411	0.12	0.424	2.75821e-09
Arhgef9	1.01469e-13	-2.59296	0.037	0.289	2.76056e-09
Fasn	1.04858e-13	-1.78699	0.068	0.339	2.85278e-09
Epn2	1.05682e-13	-1.27767	0.089	0.376	2.87519e-09
Slc7a14	1.10346e-13	-2.60516	0.037	0.287	3.00208e-09
Cacna2d3	1.14365e-13	-2.72482	0.063	0.323	3.11142e-09
Nrg2	1.16749e-13	-2.74716	0.021	0.261	3.17628e-09
Parm1	1.18633e-13	-1.51434	0.188	0.475	3.22753e-09
Ncs1	1.21601e-13	-2.58663	0.021	0.266	3.30826e-09
Lrmda	1.22394e-13	-1.04872	0.215	0.53	3.32984e-09
Mpped2	1.22449e-13	-2.35095	0.068	0.331	3.33134e-09
Oxct1	1.22455e-13	-1.04747	0.162	0.478	3.3315e-09
Pacsin1	1.23468e-13	-1.39777	0.126	0.419	3.35906e-09
Arhgap23	1.23603e-13	-1.77013	0.084	0.357	3.36275e-09
Farp2	1.26191e-13	-2.86946	0.037	0.285	3.43315e-09
Usp31	1.28363e-13	-1.71098	0.052	0.314	3.49225e-09
Gdpd5	1.29829e-13	-2.0667	0.031	0.28	3.53213e-09
Cpne2	1.36873e-13	-2.66366	0.031	0.279	3.72378e-09
Ppp2r2c	1.39856e-13	-1.46926	0.11	0.397	3.80493e-09
Dennd2a	1.44198e-13	-3.18496	0.021	0.263	3.92305e-09
Dzank1	1.44596e-13	-4.10464	0.021	0.259	3.93388e-09
Atl1	1.47091e-13	-1.39742	0.105	0.393	4.00176e-09
Atxn2	1.5123e-13	-0.848326	0.246	0.591	4.11436e-09
B4galt6	1.52054e-13	-1.61906	0.068	0.339	4.13679e-09
Jph4	1.52598e-13	-1.66284	0.068	0.337	4.15158e-09
Rcor3	1.53831e-13	-1.83037	0.052	0.315	4.18513e-09
Gna12	1.54938e-13	-1.34636	0.089	0.377	4.21523e-09
Mir124a-1hg	1.56903e-13	-3.81654	0.01	0.245	4.2687e-09
Tro	1.59569e-13	-2.04856	0.037	0.289	4.34122e-09
Pcdh10	1.62053e-13	-3.60204	0.021	0.26	4.40881e-09
Rassf3	1.62382e-13	2.24218	0.372	0.205	4.41776e-09
Grb10	1.80445e-13	-2.88346	0.031	0.277	4.9092e-09
Unc13b	1.8127e-13	-1.77543	0.073	0.345	4.93163e-09
Megf10	1.84141e-13	-3.63807	0.037	0.276	5.00974e-09
Dlc1	1.86401e-13	-1.21099	0.23	0.552	5.07121e-09
Ift43	1.88405e-13	-2.40724	0.031	0.278	5.12575e-09
Xist	1.88756e-13	0.700133	0.906	0.799	5.13531e-09
Cabp1	1.89268e-13	-1.68004	0.063	0.324	5.14922e-09
Ahnak2	1.93061e-13	-1.3933	0.277	0.586	5.25242e-09
Mamdc2	1.93598e-13	-1.75698	0.105	0.386	5.26702e-09
Nipbl	1.95957e-13	1.03043	0.696	0.642	5.33122e-09
Abhd17b	2.04827e-13	2.10259	0.513	0.39	5.57251e-09
Mapre3	2.05545e-13	-1.22565	0.126	0.425	5.59204e-09
Arfgef3	2.05727e-13	-1.63008	0.126	0.407	5.597e-09
Slc6a17	2.1637e-13	-2.68443	0.016	0.254	5.88656e-09
C130071C03Rik	2.17702e-13	-4.4224	0.026	0.26	5.9228e-09
Spata13	2.20727e-13	-1.13762	0.157	0.458	6.0051e-09
Ptprd	2.26118e-13	-2.48985	0.178	0.456	6.15177e-09
Lamb1	2.26469e-13	-2.47932	0.073	0.33	6.16132e-09
Timp2	2.31297e-13	-1.1068	0.225	0.552	6.29267e-09
Denn2b	2.31436e-13	-2.24272	0.047	0.299	6.29645e-09
Mcf2l	2.36196e-13	-2.48805	0.026	0.271	6.42595e-09
Jakmip2	2.39611e-13	-2.0426	0.047	0.305	6.51885e-09
Dlg5	2.40405e-13	-1.85543	0.026	0.268	6.54045e-09
Acadsb	2.60147e-13	-1.75569	0.037	0.288	7.07756e-09
Pdzd2	2.60665e-13	-1.32975	0.293	0.581	7.09165e-09
Gsr	2.62143e-13	-2.23902	0.047	0.299	7.13187e-09
Spats2	2.63196e-13	-2.3594	0.026	0.27	7.1605e-09
Mxi1	2.70249e-13	-1.59278	0.089	0.362	7.35238e-09
Syt7	2.71665e-13	-1.67649	0.105	0.38	7.39092e-09
Prnp	2.78167e-13	-1.28085	0.131	0.425	7.5678e-09
Cpd	2.78788e-13	-1.75032	0.068	0.335	7.5847e-09
Gabra2	2.83608e-13	-2.42302	0.042	0.289	7.71585e-09
Ret	2.84266e-13	-1.61051	0.073	0.343	7.73374e-09
Clasp2	2.85057e-13	-0.879365	0.393	0.712	7.75525e-09
Mirg	2.8797e-13	-4.27434	0.016	0.246	7.83452e-09
Vps13b	3.04585e-13	1.13014	0.66	0.578	8.28655e-09
C78859	3.08462e-13	-1.8995	0.089	0.347	8.392e-09
Sdc3	3.18735e-13	-3.04089	0.031	0.272	8.6715e-09
Dlg4	3.1913e-13	-1.59381	0.063	0.33	8.68225e-09
Rufy3	3.23e-13	-0.912468	0.351	0.66	8.78753e-09
Fbln5	3.24428e-13	-3.78461	0.021	0.254	8.82639e-09
Fat3	3.31645e-13	-2.82108	0.063	0.314	9.02274e-09
Pgm2l1	3.34174e-13	-1.48699	0.178	0.464	9.09154e-09
Ica1	3.41819e-13	-2.23936	0.031	0.275	9.29953e-09
Ap3s1	3.54597e-13	-1.9494	0.047	0.301	9.64716e-09
Rab11fip3	3.56562e-13	-1.36282	0.099	0.382	9.70064e-09
Tex2	3.74233e-13	-0.674092	0.131	0.427	1.01814e-08
Ranbp17	3.76498e-13	-2.08399	0.042	0.294	1.0243e-08
Nol4l	3.86916e-13	-1.46355	0.058	0.319	1.05264e-08
Arhgef11	3.88216e-13	-1.0246	0.194	0.516	1.05618e-08
Dab2ip	3.89925e-13	-1.50911	0.073	0.345	1.06083e-08
Atp9a	3.94773e-13	-1.24768	0.136	0.435	1.07402e-08
A830018L16Rik	4.18552e-13	-2.71373	0.084	0.335	1.13871e-08
Arid5b	4.20314e-13	1.55132	0.55	0.399	1.14351e-08
Kcnd3	4.22678e-13	-2.586	0.073	0.332	1.14994e-08
Insc	4.23911e-13	-4.13559	0.016	0.244	1.15329e-08
Kcnt1	4.27296e-13	-2.22807	0.021	0.258	1.1625e-08
Bend6	4.31361e-13	-2.36741	0.021	0.258	1.17356e-08
Usp14	4.31532e-13	-0.824552	0.11	0.403	1.17403e-08
Dclk2	4.33939e-13	-1.34736	0.178	0.47	1.18057e-08
Ptov1	4.41388e-13	-1.63423	0.063	0.327	1.20084e-08
Bean1	4.53426e-13	-1.78933	0.058	0.314	1.23359e-08
Nectin3	4.5503e-13	-2.07142	0.026	0.265	1.23795e-08
Sema6a	4.60581e-13	-2.85009	0.052	0.297	1.25306e-08
Spred1	4.67946e-13	-1.50922	0.073	0.341	1.27309e-08
Akap11	4.6852e-13	-0.91353	0.199	0.526	1.27466e-08
Isl1	4.89024e-13	-1.90884	0.052	0.302	1.33044e-08
Clip3	4.99051e-13	-1.25525	0.105	0.394	1.35772e-08
Kirrel	5.02653e-13	-2.18479	0.079	0.33	1.36752e-08
Syt9	5.04466e-13	-3.89022	0.026	0.256	1.37245e-08
Cdh20	5.24518e-13	-4.31677	0.021	0.249	1.427e-08
Cdkl2	5.42847e-13	-1.80376	0.042	0.288	1.47687e-08
Dcbld2	5.54153e-13	-1.83115	0.037	0.282	1.50763e-08
Homer2	5.6107e-13	-3.04262	0.026	0.259	1.52645e-08
Mast1	5.61903e-13	-1.94863	0.052	0.304	1.52871e-08
Adamts5	5.68325e-13	-2.45103	0.073	0.324	1.54618e-08
Mink1	5.72484e-13	-1.15918	0.094	0.375	1.5575e-08
Tbc1d32	5.75266e-13	-2.14512	0.031	0.271	1.56507e-08
Spaca6	5.78535e-13	-2.08698	0.042	0.288	1.57396e-08
Fgf1	6.14212e-13	-1.25107	0.173	0.468	1.67102e-08
Hnrnpll	6.19791e-13	-2.03639	0.042	0.289	1.6862e-08
Micu3	6.2691e-13	-1.11919	0.152	0.453	1.70557e-08
Prkar2a	6.29771e-13	-1.11231	0.126	0.424	1.71336e-08
C030017B01Rik	6.30815e-13	-2.47991	0.031	0.271	1.71619e-08
Gnb5	6.48224e-13	-3.89921	0.005	0.227	1.76356e-08
E230016M11Rik	6.5365e-13	-2.69758	0.026	0.261	1.77832e-08
Bcan	6.56366e-13	-3.05699	0.037	0.271	1.78571e-08
Mblac2	6.56682e-13	-1.59623	0.084	0.352	1.78657e-08
Arrb1	6.60429e-13	-1.21076	0.12	0.41	1.79676e-08
Snph	6.67645e-13	-1.97336	0.047	0.297	1.81639e-08
Jam3	6.69576e-13	-2.11862	0.058	0.31	1.82165e-08
Sqle	6.71273e-13	-1.59663	0.068	0.329	1.82626e-08
Shank2	6.79171e-13	-3.47911	0.026	0.257	1.84775e-08
Acvr2a	6.81374e-13	-1.86849	0.052	0.303	1.85375e-08
Zc2hc1a	7.00327e-13	-1.18786	0.131	0.419	1.90531e-08
Rhobtb3	7.66103e-13	-1.73678	0.068	0.327	2.08426e-08
Mmd2	7.73744e-13	-2.74901	0.042	0.28	2.10505e-08
Elovl7	7.78047e-13	-1.26705	0.089	0.359	2.11676e-08
Spred2	7.93607e-13	-1.02637	0.11	0.399	2.15909e-08
Hs3st5	8.18375e-13	-2.18391	0.063	0.311	2.22647e-08
Ampd3	8.187e-13	-1.27026	0.079	0.345	2.22736e-08
Psd4	8.23527e-13	3.37184	0.157	0.049	2.24049e-08
Scn2a	8.58132e-13	-2.85111	0.037	0.27	2.33464e-08
Apobec1	8.65493e-13	1.32669	0.277	0.119	2.35466e-08
Nalf1	8.71528e-13	-1.77693	0.073	0.32	2.37108e-08
Rims3	8.98083e-13	-2.69442	0.042	0.28	2.44332e-08
Pcx	9.02506e-13	-3.12321	0.026	0.256	2.45536e-08
Map7d1	9.03218e-13	-1.0529	0.12	0.411	2.4573e-08
Dync2i1	9.19361e-13	-3.4375	0.01	0.234	2.50121e-08
Gm2115	9.23809e-13	-2.88568	0.037	0.272	2.51332e-08
Tle1	9.25689e-13	-1.19855	0.11	0.392	2.51843e-08
Spire2	9.29405e-13	-2.56016	0.047	0.288	2.52854e-08
Arhgef10	9.45621e-13	-1.68676	0.084	0.345	2.57266e-08
P4ha1	9.54572e-13	-1.57841	0.063	0.323	2.59701e-08
Gnal	9.72797e-13	-1.69823	0.157	0.428	2.64659e-08
Gm48228	9.74494e-13	2.89276	0.204	0.077	2.65121e-08
Bsn	9.87513e-13	-2.26186	0.042	0.284	2.68663e-08
Hoxd4	9.98532e-13	-4.36652	0.005	0.224	2.71661e-08
Slc25a12	1.0038e-12	-1.00498	0.141	0.439	2.73094e-08
Sorbs2	1.01809e-12	-2.23237	0.11	0.367	2.76981e-08
Maf	1.06196e-12	-0.982016	0.162	0.453	2.88917e-08
Pold1	1.06891e-12	3.47924	0.141	0.041	2.90808e-08
Pja2	1.0812e-12	-0.845621	0.251	0.576	2.94151e-08
Dscam	1.08222e-12	-3.14616	0.052	0.288	2.94429e-08
Rap1gap2	1.08469e-12	-1.70898	0.105	0.369	2.95101e-08
Dzip3	1.088e-12	-0.896935	0.084	0.357	2.96002e-08
Ptp4a2	1.1038e-12	1.44735	0.565	0.46	3.00301e-08
Trerf1	1.10411e-12	-1.27461	0.105	0.381	3.00385e-08
Hmbox1	1.12237e-12	-1.05307	0.236	0.538	3.05353e-08
Mpzl1	1.19171e-12	-2.35628	0.042	0.282	3.24216e-08
Bace1	1.23406e-12	-1.84317	0.052	0.3	3.35739e-08
Bag3	1.23575e-12	-1.14735	0.115	0.398	3.36198e-08
Acer3	1.24034e-12	-1.22072	0.12	0.401	3.37448e-08
Reep5	1.24488e-12	-1.04882	0.325	0.636	3.38683e-08
Anxa5	1.2571e-12	-1.24226	0.199	0.5	3.42007e-08
Atp11a	1.26091e-12	-1.77452	0.11	0.373	3.43043e-08
Gnaq	1.3186e-12	-0.864577	0.571	0.805	3.58739e-08
Arhgef17	1.33043e-12	-1.50534	0.079	0.338	3.61957e-08
Pkd2	1.33518e-12	-1.9205	0.047	0.292	3.63248e-08
Nrxn2	1.34247e-12	-1.16801	0.131	0.42	3.65232e-08
Myo16	1.34258e-12	-4.35192	0.021	0.243	3.65262e-08
Ndufa10	1.37236e-12	-1.1504	0.115	0.396	3.73365e-08
Rfx7	1.38175e-12	1.59964	0.539	0.415	3.75919e-08
Fam168a	1.38842e-12	-0.946765	0.262	0.578	3.77734e-08
Cilk1	1.40879e-12	-2.04941	0.052	0.298	3.83275e-08
Rtn4	1.41199e-12	-0.907898	0.482	0.754	3.84146e-08
Runx1t1	1.43483e-12	-1.60758	0.099	0.363	3.9036e-08
Zswim6	1.43818e-12	-1.03788	0.267	0.595	3.9127e-08
Map7	1.44405e-12	-1.48417	0.11	0.373	3.9287e-08
Tspan3	1.45178e-12	-1.60296	0.079	0.338	3.9497e-08
Hip1	1.47179e-12	-0.974032	0.215	0.529	4.00416e-08
Slc6a15	1.47334e-12	-2.36257	0.037	0.273	4.00837e-08
Acsl6	1.50259e-12	-2.5534	0.037	0.27	4.08794e-08
Cntln	1.5486e-12	-1.3606	0.115	0.395	4.21311e-08
Cdh10	1.54975e-12	-3.24381	0.026	0.253	4.21625e-08
Dennd1b	1.55466e-12	1.19418	0.576	0.465	4.22962e-08
Pygb	1.68531e-12	-1.1036	0.236	0.546	4.58507e-08
Flot1	1.70184e-12	-1.17831	0.105	0.376	4.63003e-08
Impact	1.7084e-12	-0.921803	0.126	0.424	4.64788e-08
Mertk	1.78273e-12	-2.67399	0.073	0.31	4.85011e-08
Lin7a	1.78512e-12	-3.16316	0.031	0.259	4.85659e-08
Amer2	1.78777e-12	-3.22843	0.016	0.236	4.86382e-08
Dhcr24	1.79031e-12	-1.22598	0.12	0.401	4.87072e-08
Kank4	1.82701e-12	-1.77995	0.089	0.346	4.97056e-08
Ttyh1	1.82858e-12	-2.65113	0.068	0.304	4.97484e-08
Igsf9b	1.82956e-12	-2.95905	0.026	0.252	4.97751e-08
A830082K12Rik	1.84049e-12	-3.51773	0.016	0.235	5.00722e-08
Trpm3	1.84767e-12	-0.711935	0.759	0.91	5.02678e-08
Pld1	1.86861e-12	-2.74542	0.047	0.281	5.08374e-08
Ctnnbip1	1.88599e-12	-2.65045	0.037	0.269	5.13102e-08
Nxpe4	1.91117e-12	-2.22917	0.068	0.315	5.19953e-08
Plxnd1	1.91459e-12	-1.97507	0.058	0.302	5.20882e-08
Grina	1.92781e-12	-0.998968	0.136	0.427	5.24479e-08
Kctd1	1.98184e-12	-1.86629	0.099	0.359	5.39179e-08
Ttc7b	1.99744e-12	-1.07226	0.094	0.364	5.43424e-08
Kirrel3	2.00071e-12	-4.22282	0.042	0.272	5.44313e-08
Fam78b	2.0345e-12	-2.28	0.037	0.271	5.53507e-08
Rnf180	2.04305e-12	-2.87026	0.016	0.238	5.55833e-08
Sc5d	2.0448e-12	-1.45414	0.068	0.322	5.56308e-08
Dbn1	2.13897e-12	-2.17729	0.026	0.254	5.81928e-08
Map4k3	2.16625e-12	-0.886068	0.141	0.436	5.8935e-08
Khdrbs2	2.25756e-12	-3.64113	0.026	0.249	6.14191e-08
Necab1	2.2991e-12	-2.25861	0.052	0.293	6.25492e-08
Agrn	2.30998e-12	-3.58401	0.016	0.235	6.28454e-08
Car11	2.36357e-12	-2.40761	0.031	0.262	6.43032e-08
Cdh18	2.40745e-12	-0.730074	0.058	0.298	6.5497e-08
Apbb1	2.41852e-12	-1.56971	0.047	0.29	6.57982e-08
Bicdl1	2.46381e-12	-2.71341	0.026	0.251	6.70305e-08
Tef	2.46643e-12	-1.13541	0.136	0.426	6.71016e-08
Fhl1	2.48753e-12	-1.65254	0.099	0.361	6.76757e-08
Flnb	2.50447e-12	-1.08942	0.178	0.474	6.81366e-08
Kcna1	2.5613e-12	-1.45594	0.105	0.373	6.96826e-08
Ldhb	2.56541e-12	-1.68972	0.094	0.354	6.97945e-08
Mitf	2.59332e-12	-1.85262	0.058	0.303	7.0554e-08
Ndrg3	2.61486e-12	-1.22572	0.094	0.361	7.11399e-08
Bnc2	2.6602e-12	-2.20822	0.11	0.36	7.23734e-08
Usp20	2.66673e-12	-1.45673	0.063	0.316	7.2551e-08
Wdpcp	2.67004e-12	-1.00787	0.094	0.354	7.26411e-08
Dync1i2	2.67849e-12	-0.847372	0.492	0.738	7.2871e-08
Cry2	2.6797e-12	-1.51482	0.073	0.33	7.29039e-08
Onecut2	2.68057e-12	-1.72049	0.084	0.335	7.29275e-08
Lgi4	2.69657e-12	-2.65549	0.042	0.271	7.3363e-08
Clip4	2.72942e-12	-1.57553	0.073	0.329	7.42567e-08
Cipc	2.91384e-12	-1.93706	0.058	0.3	7.9274e-08
Pcsk1n	2.9209e-12	-1.24728	0.126	0.403	7.94661e-08
Nalcn	2.93441e-12	-1.92414	0.058	0.305	7.98336e-08
Nlgn2	2.95581e-12	-2.26584	0.037	0.268	8.04158e-08
Amotl1	2.97012e-12	-1.64474	0.079	0.334	8.0805e-08
Armcx3	2.98082e-12	-1.65429	0.058	0.304	8.10961e-08
Snx24	3.00227e-12	-1.84982	0.052	0.294	8.16798e-08
Tspan5	3.02227e-12	-1.05886	0.215	0.519	8.22239e-08
Pak1	3.08583e-12	-2.7812	0.042	0.271	8.39531e-08
Reps2	3.31724e-12	-2.17369	0.052	0.291	9.02489e-08
Dapk1	3.42975e-12	-1.18251	0.168	0.455	9.33097e-08
Ckb	3.51637e-12	-1.01721	0.173	0.47	9.56665e-08
Raet1e	3.5529e-12	3.36275	0.131	0.037	9.66603e-08
Pfkm	3.55646e-12	-1.8745	0.037	0.269	9.67571e-08
Acsl3	3.65102e-12	-1.48222	0.047	0.288	9.93297e-08
Amy1	3.68643e-12	-1.48218	0.094	0.353	1.00293e-07
Csnk1g3	3.73997e-12	1.493	0.545	0.444	1.0175e-07
Etv1	3.76565e-12	-2.25149	0.073	0.314	1.02448e-07
Bcam	3.76626e-12	-1.49082	0.11	0.372	1.02465e-07
Mras	3.80342e-12	-1.84453	0.063	0.307	1.03476e-07
Tulp4	3.83509e-12	-0.958871	0.215	0.514	1.04337e-07
Npr2	3.87811e-12	-1.6463	0.037	0.271	1.05508e-07
Thra	3.88929e-12	-0.981764	0.152	0.439	1.05812e-07
Gm14410	3.92903e-12	-1.32732	0.063	0.313	1.06893e-07
Nfasc	3.97289e-12	-1.51976	0.11	0.373	1.08086e-07
Ap3b2	3.99605e-12	-1.54597	0.089	0.347	1.08717e-07
Negr1	3.9992e-12	-2.24518	0.089	0.333	1.08802e-07
Nuak1	4.06049e-12	-1.27228	0.063	0.314	1.1047e-07
Cp	4.09478e-12	-2.72508	0.052	0.282	1.11403e-07
Gnai1	4.10228e-12	-2.29483	0.047	0.279	1.11607e-07
Zswim5	4.12395e-12	-3.1376	0.021	0.24	1.12196e-07
Herc4	4.20963e-12	1.59857	0.539	0.431	1.14527e-07
Plcb1	4.25423e-12	-1.16259	0.257	0.55	1.1574e-07
Eml2	4.32621e-12	-0.889392	0.141	0.428	1.17699e-07
Cdc42bpb	4.41397e-12	-1.0713	0.12	0.394	1.20087e-07
Sqstm1	4.50852e-12	-1.12475	0.173	0.459	1.22659e-07
Entpd3	4.51507e-12	-2.68345	0.026	0.248	1.22837e-07
Ppp2r5b	4.60521e-12	-1.24969	0.084	0.343	1.25289e-07
Lrrk2	4.61496e-12	2.22905	0.403	0.258	1.25554e-07
Gabbr1	4.71757e-12	-0.903647	0.173	0.475	1.28346e-07
Efna5	4.8285e-12	-1.3961	0.131	0.397	1.31364e-07
Gfra2	4.92263e-12	-2.53565	0.063	0.295	1.33925e-07
Ttc8	4.96605e-12	-2.95932	0.031	0.253	1.35106e-07
Ccp110	5.02676e-12	-1.32574	0.063	0.311	1.36758e-07
Gm14296	5.06987e-12	-1.53131	0.052	0.292	1.37931e-07
Cyp2j6	5.10242e-12	-3.90331	0.016	0.228	1.38816e-07
Kmt2a	5.14518e-12	1.33688	0.639	0.59	1.3998e-07
Rtkn	5.17652e-12	-2.39991	0.042	0.271	1.40832e-07
Fam102b	5.37326e-12	-1.63002	0.079	0.329	1.46185e-07
Zfp385b	5.3834e-12	-1.75196	0.089	0.332	1.46461e-07
Glt8d1	5.45701e-12	-1.39016	0.063	0.309	1.48463e-07
Slc35f4	5.4586e-12	-4.24896	0.016	0.227	1.48507e-07
Kit	5.53091e-12	-2.31747	0.037	0.266	1.50474e-07
Egfem1	5.55709e-12	-2.81283	0.084	0.318	1.51186e-07
Ssbp3	5.60672e-12	-1.00188	0.215	0.525	1.52536e-07
Gpr45	5.67481e-12	-4.06428	0.005	0.212	1.54389e-07
Nipal2	5.73675e-12	-6.18702	0	0.202	1.56074e-07
Afdn	5.7377e-12	-1.18224	0.105	0.375	1.561e-07
Ubac2	6.05922e-12	1.82507	0.471	0.34	1.64847e-07
Lrp1b	6.11739e-12	-2.40362	0.168	0.423	1.6643e-07
Ebf3	6.12768e-12	-1.79728	0.068	0.314	1.6671e-07
6430548M08Rik	6.17042e-12	-2.15869	0.042	0.271	1.67872e-07
Rps6kc1	6.17184e-12	-1.24364	0.058	0.305	1.67911e-07
Fermt3	6.37469e-12	2.7378	0.168	0.057	1.7343e-07
Arnt2	6.41811e-12	-1.83654	0.068	0.308	1.74611e-07
Rnf112	6.45268e-12	-3.33988	0.021	0.236	1.75552e-07
Pak3	6.4591e-12	-2.63843	0.047	0.275	1.75726e-07
Hmgcs2	6.47769e-12	-2.59527	0.047	0.273	1.76232e-07
Tubb5	6.52021e-12	-1.19251	0.33	0.603	1.77389e-07
Col4a2	6.54463e-12	-2.41427	0.058	0.288	1.78053e-07
Olfm1	6.62572e-12	-1.36727	0.147	0.416	1.80259e-07
Jph3	6.67001e-12	-1.99181	0.031	0.257	1.81464e-07
Eml6	6.69679e-12	-1.01262	0.147	0.424	1.82193e-07
2510009E07Rik	6.70713e-12	-1.33794	0.073	0.328	1.82474e-07
Rcan2	6.88102e-12	-1.20139	0.141	0.402	1.87205e-07
Insig1	6.88395e-12	-1.58763	0.031	0.256	1.87285e-07
Paqr8	6.94227e-12	-2.01378	0.058	0.294	1.88872e-07
Otud7a	7.01212e-12	-1.75894	0.084	0.327	1.90772e-07
Marchf8	7.18867e-12	-1.9494	0.037	0.264	1.95575e-07
Pacrg	7.19844e-12	-2.30659	0.052	0.285	1.95841e-07
Pik3r3	7.27765e-12	-2.5288	0.031	0.254	1.97996e-07
Sh3glb2	7.34221e-12	-1.34608	0.079	0.331	1.99752e-07
Ctsl	7.40081e-12	-0.926179	0.178	0.467	2.01347e-07
Tubb2a	7.5489e-12	-1.14272	0.178	0.46	2.05375e-07
C77080	7.67497e-12	-1.5408	0.063	0.305	2.08805e-07
Scrn1	8.04248e-12	-1.39524	0.047	0.281	2.18804e-07
Snap47	8.0807e-12	-2.14957	0.031	0.255	2.19843e-07
Fads1	8.11221e-12	-2.39998	0.047	0.274	2.20701e-07
Dusp3	8.32989e-12	-1.48924	0.063	0.307	2.26623e-07
Scn11a	8.39112e-12	-1.81434	0.105	0.355	2.28289e-07
Gnaz	8.43579e-12	-1.81786	0.042	0.273	2.29504e-07
Ston2	8.83947e-12	-1.91581	0.047	0.277	2.40487e-07
Bhlhb9	8.90592e-12	-0.801057	0.079	0.335	2.42294e-07
Hmgn3	8.90881e-12	-2.03109	0.042	0.269	2.42373e-07
Ackr1	8.93697e-12	-1.84938	0.037	0.265	2.43139e-07
Tmem38a	9.08687e-12	-1.68546	0.031	0.257	2.47217e-07
Mapk8ip2	9.70931e-12	-1.16252	0.115	0.385	2.64151e-07
Sorl1	9.75942e-12	1.18786	0.545	0.404	2.65515e-07
Ptpn9	9.80129e-12	-0.824273	0.126	0.399	2.66654e-07
Atp1a2	9.86783e-12	-1.38617	0.199	0.461	2.68464e-07
Dock11	9.90653e-12	1.3268	0.545	0.383	2.69517e-07
Scamp1	9.9354e-12	-1.44058	0.094	0.351	2.70303e-07
Rnf11	1.00402e-11	-0.877167	0.094	0.356	2.73153e-07
Gm14326	1.00967e-11	-1.6051	0.052	0.286	2.74691e-07
Vars	1.01219e-11	3.18029	0.23	0.1	2.75376e-07
Rusc1	1.04645e-11	-1.69875	0.052	0.286	2.84697e-07
Psmd1	1.04778e-11	-0.954237	0.162	0.455	2.85059e-07
Slc25a51	1.06123e-11	-0.775964	0.089	0.352	2.88719e-07
Jup	1.07375e-11	-2.07741	0.047	0.274	2.92124e-07
Tuba1a	1.07653e-11	-1.05914	0.545	0.791	2.92881e-07
Scn8a	1.09195e-11	-1.52548	0.131	0.389	2.97077e-07
Car10	1.11222e-11	-2.38114	0.115	0.355	3.0259e-07
D630045J12Rik	1.12092e-11	-3.10274	0.016	0.225	3.04958e-07
Syngr3	1.13356e-11	-3.16348	0.016	0.225	3.08397e-07
Pfkp	1.16902e-11	-0.813465	0.141	0.418	3.18044e-07
Arl8b	1.17613e-11	-1.20038	0.068	0.317	3.19978e-07
Art3	1.19274e-11	-1.61014	0.12	0.367	3.24497e-07
Pir	1.19626e-11	-3.07101	0.016	0.224	3.25455e-07
Lonrf2	1.202e-11	-2.65795	0.026	0.242	3.27016e-07
Myh10	1.20947e-11	-1.73665	0.058	0.295	3.29049e-07
Lgi1	1.22682e-11	-1.73125	0.089	0.334	3.33768e-07
Fam110b	1.23705e-11	-1.75289	0.042	0.271	3.36553e-07
Pde11a	1.25738e-11	-2.70182	0.063	0.287	3.42084e-07
Phldb1	1.3334e-11	-2.09392	0.047	0.273	3.62765e-07
Cpq	1.34169e-11	-1.21534	0.11	0.37	3.6502e-07
Wipi1	1.35975e-11	-2.35853	0.052	0.278	3.69933e-07
Lss	1.38206e-11	-2.27925	0.021	0.235	3.76002e-07
Lpin1	1.39603e-11	-1.24188	0.089	0.347	3.79804e-07
Arl8a	1.39628e-11	-0.836439	0.152	0.437	3.79872e-07
Fam184a	1.42995e-11	-2.47133	0.037	0.256	3.89032e-07
Epb41l5	1.43112e-11	-1.99041	0.031	0.252	3.89351e-07
Jakmip3	1.43152e-11	-3.30315	0.005	0.206	3.89459e-07
Kctd12	1.44851e-11	2.85409	0.11	0.028	3.94082e-07
Mgll	1.4559e-11	-1.12303	0.12	0.377	3.96093e-07
Adam11	1.46566e-11	-2.03002	0.052	0.283	3.98748e-07
Pea15a	1.4861e-11	-0.973581	0.11	0.377	4.04308e-07
Ckap5	1.48738e-11	-0.708807	0.22	0.525	4.04657e-07
Slc27a1	1.49026e-11	-2.01639	0.058	0.287	4.05439e-07
Morrbid	1.4992e-11	-2.19139	0.068	0.298	4.07873e-07
Vat1	1.50506e-11	-2.07401	0.037	0.259	4.09467e-07
Dmxl2	1.55059e-11	-1.14436	0.173	0.449	4.21853e-07
Vstm5	1.60155e-11	-2.87708	0.016	0.224	4.35719e-07
Nicn1	1.65095e-11	-2.22476	0.031	0.25	4.49158e-07
Ryr2	1.67072e-11	-2.7094	0.047	0.268	4.54536e-07
Rpn2	1.67848e-11	-1.89493	0.047	0.274	4.56648e-07
Col11a1	1.68359e-11	-3.04903	0.047	0.264	4.58038e-07
Scamp5	1.69012e-11	-1.57436	0.058	0.293	4.59814e-07
Tubb2b	1.70936e-11	-1.58237	0.089	0.335	4.6505e-07
Asxl3	1.76847e-11	-1.95589	0.042	0.268	4.81131e-07
Crlf3	1.77467e-11	1.67057	0.492	0.361	4.82818e-07
Reck	1.78663e-11	-2.7492	0.026	0.238	4.86072e-07
Dmtn	1.7931e-11	-1.68235	0.063	0.296	4.87832e-07
Gm10125	1.80841e-11	-1.862	0.058	0.29	4.91997e-07
Dgkg	1.80976e-11	-2.77682	0.031	0.247	4.92363e-07
Megf8	1.90519e-11	-1.95434	0.047	0.273	5.18326e-07
Rufy2	1.90637e-11	-0.855684	0.126	0.395	5.18647e-07
Spock3	1.90965e-11	-2.40738	0.052	0.277	5.19538e-07
Scg5	1.91304e-11	-1.32476	0.063	0.304	5.20461e-07
Ahi1	1.9175e-11	-1.04792	0.11	0.374	5.21676e-07
Fam13a	1.91804e-11	-3.265	0.031	0.242	5.21821e-07
Plcxd3	1.93293e-11	-2.6757	0.042	0.261	5.25874e-07
Palm	1.93694e-11	-1.2093	0.068	0.308	5.26965e-07
Grik1	1.9796e-11	-3.28352	0.225	0.478	5.38571e-07
Fndc3b	2.00142e-11	-0.96299	0.115	0.375	5.44507e-07
Faxc	2.02067e-11	-3.31628	0.01	0.211	5.49744e-07
Zmat3	2.02649e-11	-1.68995	0.052	0.283	5.51328e-07
Id4	2.0428e-11	-1.51479	0.052	0.28	5.55764e-07
Hoxa9	2.09627e-11	-4.31975	0.01	0.21	5.70313e-07
Wipf1	2.09662e-11	1.16661	0.576	0.45	5.70407e-07
Snap25	2.11668e-11	-1.06563	0.314	0.579	5.75864e-07
Aox1	2.12671e-11	-1.83628	0.058	0.29	5.78592e-07
Arhgap5	2.13647e-11	-0.501716	0.173	0.476	5.81248e-07
Sox10	2.182e-11	-2.38495	0.058	0.278	5.93636e-07
Pla2g7	2.1827e-11	-0.929059	0.11	0.376	5.93825e-07
Slc25a4	2.18851e-11	-0.982585	0.272	0.56	5.95407e-07
Gm47283	2.2197e-11	1.46046	0.539	0.433	6.03891e-07
Ehd3	2.22535e-11	-1.11849	0.084	0.334	6.0543e-07
Zmat4	2.25891e-11	-2.82278	0.052	0.273	6.14558e-07
Abcg2	2.2868e-11	-4.01127	0.026	0.232	6.22147e-07
9530077C05Rik	2.29927e-11	-2.38525	0.016	0.222	6.25541e-07
Lrrfip1	2.37013e-11	1.96218	0.414	0.271	6.44817e-07
Bmerb1	2.38609e-11	-1.43096	0.063	0.301	6.49159e-07
Synpr	2.39317e-11	-2.10217	0.068	0.296	6.51085e-07
Zc3h12b	2.39538e-11	-1.04325	0.084	0.334	6.51686e-07
Cacna2d2	2.42718e-11	-6.51996	0	0.192	6.60338e-07
Ablim3	2.43776e-11	-1.58085	0.026	0.239	6.63218e-07
Zfp804a	2.44417e-11	-3.29113	0.037	0.249	6.6496e-07
Spata7	2.45707e-11	-1.96224	0.021	0.232	6.68469e-07
Cuedc1	2.48276e-11	-1.0884	0.126	0.394	6.75458e-07
Ric3	2.50707e-11	-2.48223	0.016	0.221	6.82074e-07
Kcnh1	2.55389e-11	-1.79535	0.047	0.274	6.9481e-07
Ift81	2.60157e-11	-2.32858	0.031	0.245	7.07782e-07
Hsdl2	2.61353e-11	-2.47566	0.026	0.237	7.11037e-07
Dpp10	2.65217e-11	-2.81563	0.215	0.45	7.21548e-07
Chpt1	2.66626e-11	-1.8508	0.058	0.286	7.25383e-07
Gnb4	2.74794e-11	-2.14699	0.042	0.263	7.47606e-07
Nemp2	2.84693e-11	2.77409	0.173	0.062	7.74537e-07
Lgr5	2.85858e-11	-3.66633	0.026	0.231	7.77704e-07
Zdhhc1	2.89291e-11	-2.89892	0.021	0.227	7.87044e-07
Trim67	2.91998e-11	-2.42816	0.016	0.22	7.9441e-07
Marchf11	2.94495e-11	-2.05291	0.026	0.239	8.01202e-07
Stxbp5l	2.94734e-11	-6.64968	0.005	0.198	8.01852e-07
4930578G10Rik	2.9685e-11	-1.4498	0.052	0.275	8.07611e-07
Pdzd4	2.97429e-11	-1.03435	0.052	0.283	8.09186e-07
Ndst3	3.00161e-11	-2.95716	0.026	0.235	8.16617e-07
Pcdhac2	3.0021e-11	-1.17215	0.126	0.39	8.16752e-07
Clip2	3.01292e-11	-1.23342	0.105	0.362	8.19695e-07
Csad	3.01453e-11	-1.6542	0.079	0.314	8.20133e-07
Susd4	3.06323e-11	-1.56711	0.052	0.281	8.33383e-07
Hspa4l	3.06633e-11	-0.884456	0.141	0.418	8.34225e-07
Rgs17	3.06856e-11	-1.75305	0.031	0.246	8.34832e-07
Vdac1	3.0817e-11	-1.18017	0.126	0.388	8.38407e-07
Rsbn1l	3.10683e-11	1.53175	0.513	0.407	8.45244e-07
Aplp2	3.1143e-11	-0.685736	0.23	0.532	8.47276e-07
Lrrn1	3.30875e-11	-1.73681	0.089	0.328	9.00179e-07
Znrf3	3.35674e-11	-1.04974	0.084	0.335	9.13236e-07
Oaz2	3.39049e-11	-1.23954	0.063	0.301	9.22416e-07
Prkaa2	3.49544e-11	-2.02087	0.037	0.254	9.50969e-07
Pde1c	3.56857e-11	-2.08478	0.079	0.31	9.70866e-07
Abhd4	3.56876e-11	-4.07313	0.01	0.206	9.70916e-07
Elf1	3.5816e-11	1.53601	0.508	0.399	9.7441e-07
Ppargc1a	3.58567e-11	-1.52315	0.099	0.346	9.75516e-07
C1galt1	3.6782e-11	2.90398	0.277	0.14	1.00069e-06
Ntm	3.72414e-11	-3.42997	0.037	0.246	1.01319e-06
Arid4a	3.73527e-11	1.55784	0.518	0.409	1.01622e-06
Gpr158	3.77845e-11	-2.38845	0.084	0.314	1.02796e-06
Scn1a	3.78916e-11	-2.19259	0.079	0.305	1.03088e-06
Osbpl10	3.79049e-11	-2.11474	0.063	0.289	1.03124e-06
Pcdhga1	3.80112e-11	-2.02773	0.031	0.245	1.03413e-06
Ksr2	4.06517e-11	-1.59977	0.079	0.318	1.10597e-06
Prrt2	4.1153e-11	-0.85411	0.063	0.301	1.11961e-06
Exoc6b	4.2111e-11	-0.798088	0.288	0.589	1.14567e-06
Hey2	4.21634e-11	-3.64365	0.026	0.227	1.1471e-06
Ptpdc1	4.2235e-11	-1.93508	0.042	0.26	1.14905e-06
Ddr1	4.22558e-11	-2.2588	0.026	0.234	1.14961e-06
Ly6a	4.22937e-11	2.3665	0.105	0.027	1.15064e-06
Tnfrsf21	4.26758e-11	-1.49672	0.073	0.308	1.16104e-06
Hacd1	4.30446e-11	-3.41133	0.01	0.207	1.17107e-06
Mmp16	4.3156e-11	-2.05493	0.042	0.26	1.1741e-06
Lrp8	4.3384e-11	-2.36979	0.016	0.216	1.18031e-06
Reep2	4.35421e-11	-1.81637	0.047	0.266	1.18461e-06
Syngr1	4.40466e-11	-1.20867	0.099	0.354	1.19833e-06
Dlgap4	4.41261e-11	-0.663695	0.162	0.451	1.2005e-06
Epha5	4.45022e-11	-3.3353	0.031	0.236	1.21073e-06
Clpb	4.4771e-11	-1.71516	0.068	0.297	1.21804e-06
Sult4a1	4.47964e-11	-1.04667	0.162	0.44	1.21873e-06
Mark1	4.52684e-11	-3.18143	0.026	0.229	1.23157e-06
Sugct	4.53565e-11	-1.21707	0.073	0.312	1.23397e-06
Rassf8	4.57402e-11	-3.79413	0.016	0.213	1.24441e-06
Wdr35	4.66814e-11	-4.86242	0.005	0.196	1.27001e-06
Sptbn4	4.68192e-11	-2.58999	0.026	0.232	1.27376e-06
Cbx6	4.70162e-11	-1.10948	0.141	0.402	1.27912e-06
Snx21	4.71271e-11	-1.53673	0.042	0.259	1.28214e-06
Wasf3	4.72113e-11	-2.96114	0.016	0.214	1.28443e-06
Trpc1	4.75338e-11	-1.76293	0.042	0.259	1.29321e-06
Dock9	4.89249e-11	-0.914278	0.199	0.496	1.33105e-06
Cntn3	4.90083e-11	-2.9489	0.031	0.236	1.33332e-06
Adamts17	4.92443e-11	-2.72328	0.052	0.268	1.33974e-06
Cd99l2	5.02072e-11	-0.947609	0.099	0.355	1.36594e-06
Cyp51	5.04753e-11	-1.46156	0.058	0.284	1.37323e-06
Man1c1	5.05044e-11	-1.51534	0.068	0.299	1.37402e-06
Ulk4	5.08157e-11	-3.17118	0.01	0.206	1.38249e-06
Phactr3	5.1493e-11	-1.9552	0.021	0.225	1.40092e-06
Gm48765	5.18252e-11	-1.11452	0.157	0.421	1.40996e-06
Thsd7a	5.26729e-11	-1.39135	0.178	0.434	1.43302e-06
Map7d2	5.27516e-11	-1.35709	0.272	0.551	1.43516e-06
Syne1	5.31374e-11	-0.982306	0.272	0.552	1.44566e-06
Dkk3	5.33309e-11	-1.8313	0.037	0.253	1.45092e-06
A330023F24Rik	5.47897e-11	-0.876387	0.162	0.436	1.49061e-06
Mical3	5.50358e-11	-0.915547	0.293	0.593	1.4973e-06
Cacnb3	5.5121e-11	-1.27257	0.084	0.326	1.49962e-06
Dusp10	5.54185e-11	3.30057	0.173	0.064	1.50772e-06
Pcdh17	5.57635e-11	-1.96851	0.052	0.271	1.5171e-06
Tvp23a	5.98951e-11	-2.34057	0.026	0.233	1.62951e-06
Lima1	6.12705e-11	-1.61803	0.094	0.331	1.66692e-06
Svip	6.28283e-11	-1.55455	0.047	0.269	1.70931e-06
Lrp11	6.34885e-11	-1.68446	0.052	0.275	1.72727e-06
Ptprr	6.38438e-11	-2.77	0.052	0.265	1.73693e-06
Disc1	6.6026e-11	-2.47139	0.026	0.23	1.7963e-06
Niban2	6.65973e-11	-2.04624	0.052	0.269	1.81185e-06
Actr3b	6.66006e-11	-1.80566	0.037	0.248	1.81194e-06
Zfp704	6.67459e-11	-1.80178	0.052	0.272	1.81589e-06
Ttll5	6.73212e-11	-0.651751	0.131	0.399	1.83154e-06
Rab15	6.87331e-11	-1.99769	0.037	0.247	1.86995e-06
Gas2l3	6.92184e-11	-3.00149	0.031	0.235	1.88316e-06
Ttc3	6.95051e-11	-0.696935	0.487	0.784	1.89095e-06
Cpne6	6.95662e-11	-2.11106	0.063	0.281	1.89262e-06
Grin1	6.97758e-11	-1.41396	0.047	0.266	1.89832e-06
Gng3	7.24744e-11	-1.01776	0.147	0.414	1.97174e-06
Fam234a	7.44354e-11	-2.01319	0.047	0.262	2.02509e-06
Syt14	7.48423e-11	-2.71343	0.01	0.204	2.03616e-06
Astn1	7.55132e-11	-1.74117	0.042	0.258	2.05441e-06
Cpne3	7.56514e-11	-1.08927	0.157	0.42	2.05817e-06
Lmln	7.73056e-11	-2.94844	0.01	0.203	2.10318e-06
Ppme1	7.82342e-11	-1.15632	0.089	0.329	2.12844e-06
Cd59a	7.82828e-11	-1.35642	0.079	0.312	2.12976e-06
Prdm12	7.89112e-11	-1.8332	0.052	0.274	2.14686e-06
Rgs3	8.02857e-11	-1.20809	0.084	0.325	2.18425e-06
Unc13a	8.11972e-11	-1.00233	0.058	0.281	2.20905e-06
St13	8.14538e-11	-0.695875	0.199	0.501	2.21603e-06
Ptprn2	8.4332e-11	-2.02168	0.031	0.239	2.29434e-06
Adgrg1	8.45299e-11	-2.14842	0.042	0.253	2.29972e-06
Dleu2	8.57097e-11	0.904347	0.539	0.356	2.33182e-06
Psmd2	8.57526e-11	-1.24609	0.094	0.336	2.33298e-06
Vps13c	8.72431e-11	-0.742589	0.136	0.403	2.37353e-06
Lpxn	8.79175e-11	2.98825	0.136	0.043	2.39188e-06
Epas1	8.8956e-11	-2.13902	0.063	0.28	2.42014e-06
Rarb	8.99025e-11	-2.18403	0.042	0.254	2.44589e-06
Stac	9.03091e-11	-4.218	0.016	0.208	2.45695e-06
Mbnl2	9.21877e-11	-0.585911	0.67	0.874	2.50806e-06
Agbl4	9.23503e-11	-2.11322	0.11	0.335	2.51248e-06
Pkp4	9.43315e-11	-1.21656	0.089	0.332	2.56638e-06
Gpi1	9.52709e-11	-0.779987	0.23	0.526	2.59194e-06
Ttc9	9.53886e-11	-1.11826	0.094	0.337	2.59514e-06
Rps6ka2	9.55255e-11	-1.07933	0.073	0.308	2.59887e-06
Arhgap21	9.55753e-11	-0.801919	0.147	0.41	2.60022e-06
Snta1	9.56819e-11	-2.94966	0.037	0.238	2.60312e-06
Diaph1	9.64517e-11	1.9268	0.419	0.285	2.62406e-06
Tubb4a	9.65637e-11	-1.58391	0.084	0.316	2.62711e-06
Slc20a1	9.73235e-11	-1.54474	0.052	0.273	2.64778e-06
Syp	9.87208e-11	-1.33819	0.079	0.311	2.6858e-06
Rab27b	9.92709e-11	-2.8961	0.026	0.226	2.70076e-06
Syt4	9.93921e-11	-1.09438	0.162	0.422	2.70406e-06
Hoxc4	9.99982e-11	-2.27547	0.021	0.22	2.72055e-06
Jam2	1.00708e-10	-3.83086	0.021	0.214	2.73987e-06
Arfgap3	1.01528e-10	-1.04931	0.089	0.33	2.76216e-06
Rundc3a	1.02402e-10	-1.22465	0.079	0.313	2.78596e-06
Tmem65	1.03057e-10	-1.17748	0.089	0.327	2.80376e-06
Dusp26	1.04487e-10	-1.49283	0.042	0.257	2.84266e-06
Mpc1	1.05361e-10	-0.688181	0.136	0.403	2.86645e-06
Ifi30	1.06522e-10	3.281	0.105	0.028	2.89804e-06
Cmtm4	1.07e-10	-2.27002	0.021	0.22	2.91104e-06
Ece2	1.08382e-10	-1.82398	0.037	0.247	2.94864e-06
Ctnnb1	1.09065e-10	-1.0513	0.126	0.382	2.96723e-06
Rasgrp1	1.09775e-10	1.88478	0.34	0.193	2.98653e-06
Apba2	1.10305e-10	-2.37381	0.021	0.218	3.00095e-06
Fam76a	1.13757e-10	-1.36605	0.052	0.272	3.09486e-06
Acpp	1.13835e-10	-2.14248	0.073	0.291	3.097e-06
Hecw2	1.1556e-10	-1.37279	0.094	0.331	3.14394e-06
Tspan17	1.15618e-10	-0.800386	0.126	0.384	3.1455e-06
Camk2a	1.17686e-10	-1.58421	0.068	0.292	3.20176e-06
Mprip	1.18191e-10	-0.660076	0.293	0.622	3.21549e-06
Ddhd2	1.18512e-10	-0.810666	0.105	0.36	3.22424e-06
Nrn1	1.19739e-10	-0.904875	0.126	0.389	3.25762e-06
Rgcc	1.19798e-10	-2.56453	0.042	0.247	3.25921e-06
Khdrbs3	1.24028e-10	-2.0386	0.037	0.244	3.37431e-06
Psmd3	1.24389e-10	-1.30933	0.068	0.292	3.38413e-06
Atp6v0e2	1.24704e-10	-1.53293	0.068	0.292	3.3927e-06
Abtb2	1.25075e-10	-1.03918	0.11	0.361	3.40279e-06
Golim4	1.25954e-10	-0.83419	0.073	0.306	3.42671e-06
Glul	1.2817e-10	-1.05663	0.157	0.42	3.487e-06
Crip2	1.29001e-10	-0.964068	0.157	0.42	3.50961e-06
Mfsd6	1.29975e-10	-0.940852	0.115	0.367	3.53609e-06
Parvb	1.32688e-10	-1.553	0.047	0.26	3.60992e-06
Dock5	1.33482e-10	-1.59505	0.084	0.314	3.6315e-06
Cc2d2a	1.35826e-10	-2.71939	0.031	0.231	3.69527e-06
Zfp292	1.3871e-10	1.52548	0.513	0.415	3.77373e-06
Gas6	1.40397e-10	-1.49358	0.063	0.286	3.81963e-06
Ptms	1.40455e-10	-0.816417	0.152	0.425	3.82121e-06
Tulp3	1.4103e-10	-0.69891	0.079	0.318	3.83687e-06
Srrm4	1.41203e-10	-3.66328	0.01	0.198	3.84157e-06
Clstn2	1.42579e-10	-1.64307	0.099	0.33	3.87902e-06
Pdia4	1.4262e-10	2.55413	0.267	0.134	3.88011e-06
Ndfip2	1.43959e-10	-0.78083	0.147	0.417	3.91655e-06
Limk1	1.44248e-10	-1.02376	0.084	0.324	3.92441e-06
Pmm1	1.443e-10	-1.01182	0.12	0.373	3.92583e-06
Rap1gap	1.44805e-10	-1.44575	0.089	0.323	3.93957e-06
Ntng1	1.44985e-10	-2.71926	0.068	0.279	3.94446e-06
Plp1	1.47905e-10	-0.880696	0.188	0.454	4.02389e-06
Tespa1	1.52466e-10	3.34246	0.209	0.091	4.148e-06
Cul9	1.53145e-10	-1.03703	0.089	0.328	4.16647e-06
Traf3	1.54311e-10	1.86619	0.461	0.348	4.19818e-06
Dgkz	1.56076e-10	-1.28614	0.262	0.515	4.24621e-06
Ror1	1.61939e-10	-2.90164	0.047	0.251	4.40571e-06
Six1	1.64463e-10	-3.21993	0.016	0.206	4.47439e-06
Myo1b	1.65065e-10	-2.55273	0.037	0.239	4.49076e-06
Sgce	1.65408e-10	-2.35416	0.031	0.23	4.5001e-06
Ltbp3	1.66047e-10	-2.41993	0.026	0.222	4.51747e-06
Ppef1	1.66702e-10	-1.70201	0.037	0.245	4.53529e-06
Trim46	1.72004e-10	-2.49252	0.021	0.216	4.67955e-06
Nat8l	1.73351e-10	-1.39022	0.105	0.346	4.71618e-06
Ror2	1.74307e-10	-2.44397	0.063	0.272	4.74219e-06
Mtmr7	1.74842e-10	-1.71545	0.047	0.258	4.75674e-06
Gm1604a	1.7645e-10	-1.70377	0.031	0.234	4.8005e-06
Zhx3	1.79381e-10	-1.31661	0.026	0.227	4.88023e-06
Hdx	1.80126e-10	-3.074	0.005	0.188	4.9005e-06
Prelid1	1.80144e-10	-1.16137	0.063	0.285	4.90098e-06
Plekhg1	1.80283e-10	-1.24529	0.126	0.376	4.90479e-06
Ogfrl1	1.81571e-10	-0.932236	0.105	0.352	4.93981e-06
Disp2	1.82977e-10	-1.3722	0.058	0.277	4.97808e-06
Gapdh	1.83614e-10	-1.38828	0.099	0.333	4.99541e-06
Arhgef4	1.85527e-10	-2.72877	0.021	0.214	5.04745e-06
Uhmk1	1.91472e-10	-1.30184	0.126	0.37	5.2092e-06
Adk	1.95308e-10	-0.842518	0.277	0.56	5.31355e-06
Abca5	1.9591e-10	-1.34687	0.079	0.305	5.32992e-06
Ablim1	1.96483e-10	0.991617	0.592	0.461	5.34551e-06
Mif4gd	1.97427e-10	2.87847	0.22	0.098	5.3712e-06
Cep112	1.98292e-10	-1.54519	0.073	0.296	5.39473e-06
Dtx3	1.98322e-10	-0.878994	0.073	0.304	5.39556e-06
Gm9801	1.99266e-10	-5.42751	0.005	0.185	5.42123e-06
Prdm5	2.01318e-10	-3.6206	0.021	0.21	5.47706e-06
Ncdn	2.05573e-10	-1.23278	0.141	0.395	5.59282e-06
Nr3c1	2.06784e-10	1.46463	0.503	0.399	5.62577e-06
Lhfpl4	2.07838e-10	-1.07402	0.131	0.382	5.65445e-06
Tango2	2.08607e-10	-0.993567	0.141	0.395	5.67537e-06
Atn1	2.14302e-10	-1.85068	0.026	0.224	5.83029e-06
Adamts9	2.17146e-10	-3.01989	0.026	0.219	5.90766e-06
Ttl	2.18084e-10	-1.22136	0.131	0.379	5.9332e-06
Clgn	2.23338e-10	-1.02429	0.073	0.305	6.07615e-06
Ece1	2.25564e-10	-0.743274	0.126	0.386	6.13668e-06
Fnbp1	2.25821e-10	1.11078	0.639	0.617	6.1437e-06
Acat1	2.28138e-10	-1.07134	0.105	0.347	6.20671e-06
Mtfr1l	2.30874e-10	-1.5298	0.026	0.224	6.28116e-06
Sned1	2.31714e-10	-1.97296	0.052	0.265	6.30402e-06
Sh3bgrl2	2.33636e-10	-1.67406	0.094	0.321	6.35629e-06
Rit2	2.34653e-10	-1.67907	0.047	0.256	6.38397e-06
Basp1	2.35302e-10	-1.45073	0.105	0.336	6.40164e-06
Atcay	2.37424e-10	-1.60882	0.042	0.25	6.45936e-06
Nrp1	2.55635e-10	-2.05704	0.068	0.28	6.95481e-06
Ap2m1	2.56144e-10	-1.21026	0.089	0.322	6.96865e-06
Nhsl1	2.5802e-10	-2.76169	0.031	0.226	7.01969e-06
Etfa	2.58887e-10	-1.10889	0.12	0.367	7.04327e-06
Map9	2.5967e-10	-2.32593	0.042	0.243	7.06458e-06
Dnah7b	2.61962e-10	-2.74052	0.026	0.219	7.12693e-06
Lhfpl2	2.64971e-10	-2.94088	0.026	0.218	7.20881e-06
Dlat	2.65436e-10	-0.847875	0.084	0.322	7.22145e-06
Adcy9	2.68688e-10	-0.827416	0.152	0.415	7.30993e-06
Hs6st2	2.72804e-10	-2.49914	0.052	0.255	7.42191e-06
[truncated: 7,282 more rows]

## Sheet: FindMarkers_IMM_HSC
	p_val	avg_log2FC	pct.1	pct.2	p_val_adj
[truncated: 9,488 more rows]

[truncated: 11 more sheets: FindMarkers_IMM_MYEL, FindMarkers_IMM_TC, FindMarkers_MUR, FindMarkers_MSC, FindMarkers_NEU_NF, FindMarkers_NEU_NP, FindMarkers_NEU_PEP, FindMarkers_NEU_TH, FindMarkers_NMSC, FindMarkers_SGC, FindMarkers_VEC]
